# Supplementary material
Source: publisher figshare collection journal article supplement (https://plos.figshare.com/articles/dataset/_/6806699)
Supplement: Supplementary file 1 [file 1]

Archive with 7 entries (7 files):
- pone.0200507.s001.pdf
- pone.0200507.s002.pdf
- pone.0200507.s003.xlsx
- pone.0200507.s004.pdf
- pone.0200507.s005.pdf
- pone.0200507.s006.pdf
- pone.0200507.s007.pdf
