# Supplementary material
Source: publisher figshare collection journal article supplement (https://plos.figshare.com/articles/dataset/_/6806699)
Supplement: Supplementary file 1 [file 1 › pone.0200507.s001.pdf]

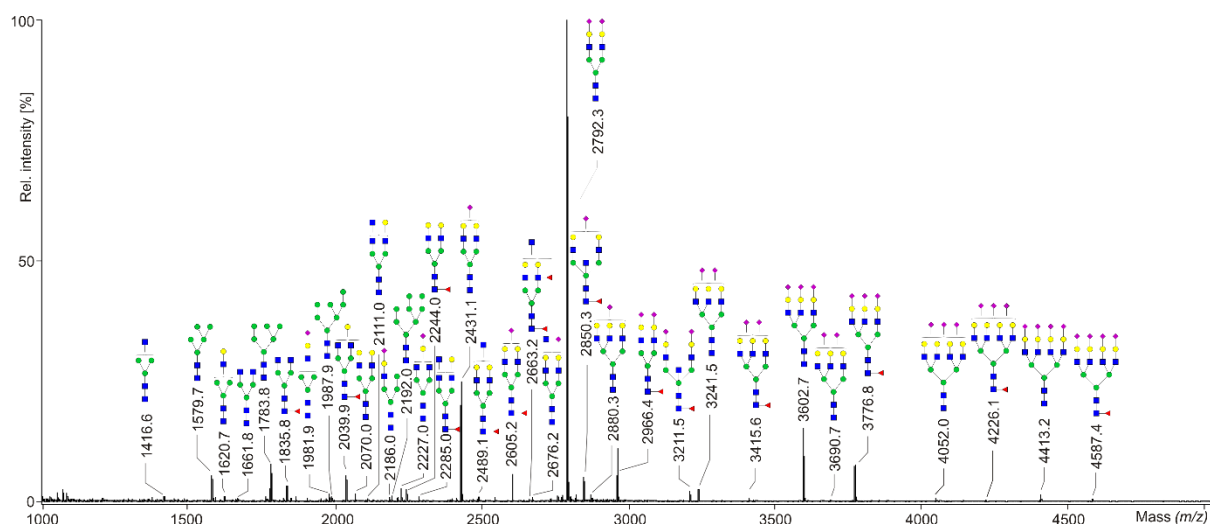

**S1 Fig.** MALDI-TOF-MS N-glycome profile obtained after PNGase F enzymatic release from plasmatic proteins, purification and permethylation. Measurements were performed in positive-ion mode. All ions are present in their sodiated form  $[M+Na]^+$ . Structures are depicted following the CFG notation.
