# Supplementary material
Source: publisher figshare collection journal article supplement (https://plos.figshare.com/articles/dataset/_/6806699)
Supplement: Supplementary file 1 [file 1 › pone.0200507.s003.xlsx]

## Sheet: MALDI-TOF-MS
Condition	Person	Tube	Sample Type	Collection method	Additive	Conditions before centrifugation	Conditions after centrifugation	Storage time	Storage Temperature	Reference	Hemolysis	Sample	SampleX (X= A,B,C for replicates)	Free hemoglobin [mg/dl]	N3H3	N2H5	N3H4	N4H3	N2H6	N4H3F1	N3H4S1	N2H7	N4H4F1	N4H5	N5H4	N3H5S1	N2H8	N4H4S1	N4H5F1	N5H4F1	N5H5	N3H6S1	N4H5S1	N5H5F1	N5H6	N4H5S1F1	N5H5F2	N5H5S1	N5H6F1	N4H5S2	N5H5S1F1	N5H6S1	N4H5S2F1	N5H5S2	N5H6S1F1	N5H5S2F1	N5H6S2	N5H6S2F1	N5H6S3
1	1	F	Serum	Free flow	clot activator	0.5h,RT	stored immediately	until analysis	-80C	reference	none	3	3-A		0.00156024	0.00665247	0.00207118	0.000720113	0.00677935	0.00403263	0.00443041	0.00248267	0.0164186	0.00263698	0.00236608	0.00217063	0.00359028	0.00785609	0.00940604	0.00178656	0.000288045	0.00042178	0.0987412	0.00205404	0.000205746	0.0199506	0.00272614	0.0101604	0.00115904	0.532198	0.0136204	0.00345311	0.0462861	0.00034634	0.000168026	0.0152458	0.0145737	0.00270557	0.129099
1	1	F	Serum	Free flow	clot activator	0.5h,RT	stored immediately	until analysis	-80C	reference	none	3	3-B		0.00268671	0.00879939	0.00239432	0.000405489	0.0113399	0.00406041	0.00625612	0.00193366	0.0128212	0.00324116	0.00146473	0.00380112	0.00440246	0.00901731	0.0118557	0.00231984	0.000750293	0.000278601	0.102296	0.00292118	0	0.0212178	0.00330736	0.0091773	0	0.533067	0.0107386	0.00524378	0.048587	0.00145645	0.00338459	0.0122198	0.0149286	0.00188952	0.114701
1	1	F	Serum	Free flow	clot activator	0.5h,RT	stored immediately	until analysis	-80C	reference	none	3	3-C		0.00117115	0.00799833	0.00352253	0.000635509	0.0127102	0.00442132	0.00516578	0.00440317	0.0187747	0.00293242	0.00138904	0.00435777	0.00331372	0.00936013	0.0166685	0.00322294	0.000826161	0.00076261	0.128318	0.00270545	0.00041762	0.0154519	0.0033228	0.00844319	0.00145259	0.53666	0.0108763	0.00401278	0.0449759	0.00171587	0.00210626	0.0108127	0.0104496	0.00242401	0.0926935
2	1	A	Serum	Free flow	clot activator	6h,RT	stored immediately	until analysis	-80C	sample	none	4	4-A		0.000661745	0.00427103	4.9e-05	2.45e-05	0.00463867	0.00119063	0.00150279	0.00108227	0.00258506	0.000917155	0.000633366	0.00161244	0.00190268	0.00347384	0.00326487	0.000628206	0.000199942	0.000554679	0.0853651	0.00107453	0.000104486	0.0148628	0.00200329	0.00776422	0.000396015	0.609902	0.0108898	0.00320811	0.0487718	0.00109775	0.00185366	0.0104821	0.0105466	0.001219	0.136995
2	1	A	Serum	Free flow	clot activator	6h,RT	stored immediately	until analysis	-80C	sample	none	4	4-B		0.00056464	0.00804157	0.000846961	1.64e-05	0.0110433	0.00127499	0.00229317	0.0019981	0.00512366	0.00116571	0.00175221	0.00340241	0.00326581	0.00283049	0.00506537	0.00145896	0.000652069	0.00142982	0.117815	0.00103639	6.56e-05	0.0204036	0.00185785	0.0122527	8.74e-05	0.599226	0.0113165	0.00298895	0.0470837	0.000140249	0.00123128	0.0102273	0.00897596	0.00169392	0.0957284
2	1	A	Serum	Free flow	clot activator	6h,RT	stored immediately	until analysis	-80C	sample	none	4	4-C		0.00151699	0.00969609	0.000286003	0.000600016	0.00966513	0.00209342	0.00228213	0.00259024	0.00555789	0.00244134	0.00183838	0.00287772	0.00373868	0.00643212	0.00600901	0.00157007	0.000635398	0.00139168	0.124719	0.000834421	0.000648666	0.0190693	0.00197843	0.00825133	0.00028158	0.58392	0.00917125	0.0051967	0.0438248	0.00139316	0.00217156	0.00850195	0.0113546	0.00105998	0.0997236
3	1	B	Serum	Free flow	clot activator	2h,RT	stored immediately	until analysis	-80C	sample	none	5	5-A		0.00302306	0.00715482	0.00185779	0.000636605	0.00916152	0.00321684	0.00444388	0.00219528	0.0112866	0.003237	0.00160419	0.00351011	0.00341062	0.00997565	0.0105882	0.00215626	0.000739346	0.000427221	0.119048	0.00202556	3.19e-05	0.022075	0.00870179	0.0131346	3.71e-05	0.521696	0.0113132	0.00305558	0.0436104	0.00217902	0.00121534	0.0120493	0.0146725	0.00170108	0.118474
3	1	B	Serum	Free flow	clot activator	2h,RT	stored immediately	until analysis	-80C	sample	none	5	5-B		0.00156156	0.00929164	0.00281944	0.000476384	0.0108302	0.00292882	0.00372616	0.0023373	0.00972053	0.0028727	0.00172851	0.00274604	0.00279786	0.00699464	0.00794884	0.00159034	0.000826116	0.000791574	0.10685	0.00191273	8.49e-05	0.0189532	0.00478543	0.0104272	0.000102185	0.56914	0.010869	0.00276043	0.0441742	0.00130538	0.00178176	0.011072	0.0137648	0.00211854	0.107525
3	1	B	Serum	Free flow	clot activator	2h,RT	stored immediately	until analysis	-80C	sample	none	5	5-C		0.00158079	0.0071816	0.00198315	0.000222074	0.00734398	0.00391615	0.0043018	0.00184107	0.0103515	0.00229596	0.00146736	0.00300756	0.00313173	0.00670402	0.00916714	0.00187569	0.000864419	0	0.11191	0.00276877	0	0.0232581	0.00460745	0.013328	2.03e-05	0.537339	0.0121186	0.00393167	0.0482415	0.00125723	0.00182435	0.0141316	0.0158485	0.00175869	0.113425
4	1	C	Serum	Free flow	clot activator	2h,4C	stored immediately	until analysis	-80C	sample	none	6	6-A		0.00299278	0.0107271	0.00319851	0	0.0114632	0.00313101	0.00918086	0.00329495	0.00986557	0.00509833	0.00275169	0.00485724	0.00540693	0.0152821	0.00708816	0.00212163	0.00155907	0.00109939	0.144171	0.00227271	0	0.0227914	0.00262632	0.0112221	0.00050469	0.551858	0.00571875	0.00292527	0.0477045	0.00187089	0.00120225	0.00823899	0.00974341	0.00117011	0.0683839
4	1	C	Serum	Free flow	clot activator	2h,4C	stored immediately	until analysis	-80C	sample	none	6	6-B		0.00230395	0.0149657	0.00307597	0.00115847	0.0193492	0.00376482	0.010772	0.00483145	0.0125396	0.00520143	0.00227276	0.00393638	0.00701149	0.0122892	0.0121315	0.00244172	0.00123992	0.00102244	0.154239	0.00245038	0.000134303	0.0276812	0.00137509	0.0120448	0	0.512882	0.0105554	0.00367124	0.0484522	0.00154145	0.0023594	0.00959877	0.00996616	0.00111342	0.0683646
4	1	C	Serum	Free flow	clot activator	2h,4C	stored immediately	until analysis	-80C	sample	none	6	6-C		0.00419604	0.0378577	0.0112913	0.000476238	0.0410627	0.00849827	0.0107186	0.0100107	0.0240693	0.004225	0.00281881	0.00623293	0.0160376	0.0136114	0.0136211	0.00199183	0.00126461	0.00140941	0.160734	0.000968565	2.57e-05	0.0275381	0.000196287	0.0100364	9.33e-05	0.501244	0.00906461	0.00189852	0.0447245	9.65e-05	0.00139975	0.00572773	0.00225248	0.000154456	0.0202691
5	1	D	Serum	Free flow	clot activator	0.5h,RT	6h,RT	until analysis	-80C	sample	none	11	11-A		0.00284961	0.0151185	0.0024641	0.00100154	0.0184132	0.00480102	0.00747179	0.00358487	0.0200308	0.00337423	0.00323513	0.00627948	0.0091291	0.0141169	0.0131988	0.00267474	0.00192359	0.000782948	0.150235	0.00261115	0.000520641	0.0257499	0.00160962	0.0118794	0.000162949	0.562856	0.0152099	0.00538923	0.044942	0.00103333	0.000687564	0.00997166	0.00494013	0.000119231	0.0256704
5	1	D	Serum	Free flow	clot activator	0.5h,RT	6h,RT	until analysis	-80C	sample	none	11	11-B		0.00386749	0.0211102	0.00174593	0.00142012	0.0242571	0.00730184	0.00997535	0.0053451	0.0200944	0.00345352	0.00302423	0.00458234	0.00995619	0.012164	0.0144772	0.00379849	0.00160602	0.00123806	0.14968	0.00243203	0.000686105	0.0242417	0.00205065	0.00862039	0.000275975	0.541272	0.010648	0.000958247	0.0408003	0.000266393	0.00143162	0.00818152	0.00459959	0.000895003	0.0448421
5	1	D	Serum	Free flow	clot activator	0.5h,RT	6h,RT	until analysis	-80C	sample	none	11	11-C		0.00390098	0.015484	0.00338186	0.00126289	0.0196749	0.00727677	0.00825277	0.00364749	0.0207951	0.00473886	0.00302667	0.00360499	0.00598049	0.0136124	0.0146901	0.00376437	0.000760463	0.000730105	0.160125	0.00289765	4.55e-05	0.0305627	0.00248782	0.0127214	7.13e-05	0.533536	0.0136762	0.00409223	0.0465325	0.00106708	0.000824215	0.00836206	0.00615656	0.000807518	0.0367269
6	1	E	Serum	Free flow	gel	0.5h,RT	6h,RT	until analysis	-80C	sample	none	12	12-A		0.00256007	0.0103437	0.00200306	0.0011612	0.0115539	0.00410773	0.00632489	0.00253467	0.011318	0.00153314	0.0017799	0.00307898	0.00430005	0.0119458	0.0117517	0.00194319	0.00100335	0.00105233	0.125028	0.00181074	0	0.0212172	0.00203391	0.0105524	0.000255826	0.573364	0.0081955	0.00261451	0.0430586	0.00219176	0.0022734	0.00922788	0.00968328	0.0011739	0.0812583
6	1	E	Serum	Free flow	gel	0.5h,RT	6h,RT	until analysis	-80C	sample	none	12	12-B		0.00323464	0.0147213	0.00197387	0.00114867	0.0150153	0.00486115	0.00743232	0.00344048	0.0159618	0.0041499	0.00109169	0.0030141	0.0052471	0.0115381	0.0127437	0.00123872	0.00103472	0.000909743	0.132865	0.00224219	0	0.0221518	0.00229365	0.00873904	0.000336329	0.544535	0.00811601	0.00280458	0.0405947	0.000845417	0.00244436	0.00850012	0.00952197	0.00124056	0.0868078
6	1	E	Serum	Free flow	gel	0.5h,RT	6h,RT	until analysis	-80C	sample	none	12	12-C		0.00176613	0.00781951	0.000863411	0.000309991	0.00888261	0.00110557	0.00256741	0.00214458	0.00602549	0.00197469	0.00157595	0.00186692	0.00403623	0.00566225	0.00533007	0.000950259	0.000324572	0.000588286	0.0992885	0.00140098	0	0.0174229	0.000862143	0.00995649	0.000124884	0.594722	0.0115927	0.00638493	0.0510389	0.00194996	0.00170844	0.0127261	0.0128497	0.0019823	0.101845
7	1	F	Serum	Free flow	clot activator	0.5h,RT	stored immediately	2 M	-80C	sample	none	10	10-A		0.00432239	0.0207313	0.00645283	0.00224965	0.0219888	0.00552605	0.00782184	0.00527994	0.0206429	0.00664126	0.00300337	0.00428394	0.00819871	0.011902	0.0163551	0.00199584	0.00130364	0.00158052	0.162651	0.00278802	0	0.0281033	0.00173434	0.0109521	0	0.518803	0.011379	0.00171127	0.0415281	0.000584523	0.00107291	0.00727193	0.0076834	0.00106906	0.0441507
7	1	F	Serum	Free flow	clot activator	0.5h,RT	stored immediately	2 M	-80C	sample	none	10	10-B		0.00627456	0.0238262	0.00288252	0.00106179	0.0337031	0.00910364	0.0099374	0.00941006	0.0275924	0.00908582	0.00507025	0.00493485	0.013814	0.0121536	0.0260995	0.0037626	0.00248702	0.000652041	0.180056	0.00391938	3.92e-05	0.0300759	0.00107605	0.0151359	0	0.455481	0.00988039	0.00287183	0.0364074	0.000780312	7.13e-06	0.00679477	0.00790645	0.00152856	0.0369811
7	1	F	Serum	Free flow	clot activator	0.5h,RT	stored immediately	2 M	-80C	sample	none	10	10-C		0.00409519	0.0157924	0.00567967	0.00150875	0.0161303	0.00390295	0.00846416	0.00364081	0.0149419	0.00625637	0.0043049	0.00358256	0.00788163	0.0147846	0.0127341	0.00304081	0.00133399	0.000419422	0.153893	0.00283692	0.000110681	0.0232721	8.16e-05	0.0118487	0	0.549821	0.00904086	0.00412431	0.0402586	0.000541753	0.00018641	0.00601753	0.00848746	0.00076894	0.0499869
8	1	F	Serum	Free flow	clot activator	0.5h,RT	stored immediately	2 M	-20C	sample	none	9	9-A		0.00114357	0.00919899	0.00140291	0.00024702	0.0101419	0.003311	0.00282224	0.00276298	0.0143242	0.00339843	0.00201019	0.00192335	0.00563921	0.00677573	0.0145941	0.00223198	0.00072111	0.000508121	0.128143	0.00264035	0	0.0270677	0.00129025	0.0133702	2.46e-05	0.512388	0.0119455	0.0041741	0.0518219	0.00137826	0.00216744	0.013156	0.0144416	0.00227892	0.106664
8	1	F	Serum	Free flow	clot activator	0.5h,RT	stored immediately	2 M	-20C	sample	none	9	9-B		0.00306136	0.0190448	0.00306136	0.000405399	0.0172563	0.00698121	0.00460843	0.00446833	0.0181327	0.00418813	0.00205382	0.00290337	0.00692159	0.0071392	0.012618	0.00288847	0.000825702	0.000584251	0.12317	0.00199421	0.000447131	0.0230243	0.000938976	0.00867137	0.00020568	0.556789	0.0092109	0.0024622	0.0464689	9.24e-05	0.000575309	0.00949409	0.0108176	0.00108802	0.0746828
8	1	F	Serum	Free flow	clot activator	0.5h,RT	stored immediately	2 M	-20C	sample	none	9	9-C		0.00213642	0.0111767	0.0023021	0.000395972	0.0120067	0.00512858	0.00730891	0.0032357	0.0178113	0.00458433	0.00199643	0.00321168	0.00591141	0.0102505	0.0156359	0.00234518	0.00113656	0.000619638	0.144514	0.00269062	0.000460586	0.0292447	0.00169738	0.0128533	0.000492065	0.55085	0.011986	0.00392492	0.0447465	0.00149111	0.00163608	0.00893256	0.0102456	0.0010504	0.0576081
9	1	F	Serum	Free flow	clot activator	0.5h,RT	24h,4C	until analysis	-80C	sample	none	7	7-A		0.00116622	0.0102567	0.000606344	0.000183529	0.0109049	0.00238356	0.00266931	0.00319202	0.00644443	0.00320131	0.0021466	0.00349867	0.00534558	0.0059798	0.00699502	0.00161692	0.000813104	0.00111047	0.122656	0.00391916	0	0.021826	0.00253224	0.011272	0.000360089	0.56823	0.0105169	0.0051365	0.0490209	0.000887445	0.00229528	0.00895576	0.0108352	0.0016657	0.0936859
9	1	F	Serum	Free flow	clot activator	0.5h,RT	24h,4C	until analysis	-80C	sample	none	7	7-B		0.00412033	0.0145564	0.00324217	0.000242372	0.0139733	0.00364261	0.00556754	0.00238157	0.00806151	0.0030279	0.00108541	0.00397631	0.00542001	0.00779455	0.007503	0.00125753	0.000713066	0.00118727	0.121818	0.00203733	0.000105379	0.0199026	0.00179145	0.00968435	0.000530409	0.589411	0.013745	0.00288037	0.0457276	0.000853572	0.00114161	0.00670915	0.0087535	0.00128563	0.0726239
9	1	F	Serum	Free flow	clot activator	0.5h,RT	24h,4C	until analysis	-80C	sample	none	7	7-C		0.00126939	0.0149174	0.00136293	0.000350085	0.0169831	0.0019081	0.00190542	0.00337792	0.00677721	0.00202301	0.00226353	0.00230361	0.00642446	0.0041636	0.00799049	0.00190275	0.000996806	0.00165689	0.120651	0.00244792	4.81e-05	0.0247465	0.00189473	0.010409	0.000187068	0.574329	0.0151205	0.00333249	0.0497495	0.000996806	0.00173706	0.00929996	0.011168	0.00197223	0.0772699
10	1	F	Serum	Free flow	clot activator	0.5h,RT	48h,4C	until analysis	-80C	sample	none	8	8-A		0.00122108	0.00491221	0.000828005	0.000934995	0.00714271	0.00200954	0.00260729	0.00130946	0.0088057	0.00260263	0.00123038	0.00303292	0.00230027	0.00490756	0.00887082	0.00163043	0.000674499	0.000444239	0.116932	0.00111176	0	0.0195535	0.00285848	0.00827075	0.000186069	0.618962	0.00604025	0.00335156	0.0470614	0.00120479	0.00361438	0.00823354	0.010278	0.00146762	0.0823307
10	1	F	Serum	Free flow	clot activator	0.5h,RT	48h,4C	until analysis	-80C	sample	none	8	8-B		0.00118069	0.00438919	0.00142688	0.000754475	0.0050616	0.00262346	0.00330645	0.00161219	0.00891869	0.00255198	0.00113304	0.00176574	0.00327469	0.00446067	0.00879162	0.00153278	0.000754475	0.000505631	0.122371	0.000119128	0.000164131	0.0196772	0.000794184	0.00928137	0.000367972	0.614953	0.00729326	0.00386768	0.0439978	0.000725355	0.0023852	0.00930519	0.0100941	0.00185839	0.0841438
10	1	F	Serum	Free flow	clot activator	0.5h,RT	48h,4C	until analysis	-80C	sample	none	8	8-C		0.000920376	0.00551439	0.00162573	0.000131108	0.00727123	0.00340618	0.00254349	0.00222096	0.00997991	0.00232585	0.00137401	0.00405647	0.00302859	0.00531773	0.00975179	0.00181453	0.000996418	0.000317281	0.124361	0.00075518	0	0.0218688	0.00101739	0.00967312	0.000374968	0.58334	0.00604406	0.00342453	0.0437454	0.00198759	0.00219474	0.00947908	0.010798	0.00165196	0.0973553
11	1	H	Plasma	Free flow	citrate	0.5h,RT	stored immediately	until analysis	-80C	reference	none	2	2-A		0.00333912	0.00944359	0.00239477	0.0012193	0.0117348	0.00398464	0.0042795	0.00251829	0.0127947	0.00512424	0.00239477	0.00916466	0.00426356	0.00965876	0.0137032	0.00285698	0.00119141	0.000382525	0.183373	0.00222741	0.000103601	0.0251152	0.00734767	0.0128863	0	0.548342	0.0107824	0.00293668	0.0388223	0.000410417	0.00251032	0.00655472	0.00690537	0.000697311	0.0417669
11	1	H	Plasma	Free flow	citrate	0.5h,RT	stored immediately	until analysis	-80C	reference	none	2	2-B		0.00144029	0.00650181	0.00150092	5.9e-05	0.00955117	0.0028429	0.00471414	0.00300512	0.010921	0.00359008	0.00131576	0.00691472	0.00374247	0.00825343	0.0115502	0.00115682	0.000930702	0.000680002	0.180881	0.00139441	0	0.0219633	0.00737188	0.00912678	0.000104868	0.576237	0.00620523	0.00257418	0.0370986	0.000142555	0.00150584	0.00480917	0.00702615	0.000720966	0.0560666
11	1	H	Plasma	Free flow	citrate	0.5h,RT	stored immediately	until analysis	-80C	reference	none	2	2-C		0.00344641	0.00901622	0.00172503	0.00123895	0.00988239	0.00497043	0.00698419	0.00198817	0.0123713	0.00357067	0.000946575	0.00759818	0.00285069	0.00893216	0.00967773	0.000888099	0.00158981	0.000924647	0.181596	0.000979468	0.00020832	0.0202874	0.00494485	0.00839492	9.87e-05	0.602921	0.00263141	0.0037461	0.0335577	0.000709018	0.00167021	0.00296399	0.00448801	0.000592066	0.0338976
12	1	G	Plasma	Vacuum	citrate	0.5h,RT	stored immediately	until analysis	-80C	sample	none	1	1-A		0.00131482	0.00673902	0.00176052	0.00058387	0.00542865	0.00184075	0.00426091	0.00192989	0.0109687	0.00302632	0.00171595	0.00184521	0.00194326	0.00506318	0.00881599	0.00167138	0	0	0.0960979	0.00129699	9.81e-05	0.0178325	0.000588327	0.00969848	0.00105631	0.588817	0.0105409	0.0031734	0.0470929	0.00105186	0.00238451	0.0128362	0.0126089	0.0027589	0.109656
12	1	G	Plasma	Vacuum	citrate	0.5h,RT	stored immediately	until analysis	-80C	sample	none	1	1-B		0.00405765	0.00656714	0.00271411	0.000293417	0.0066791	0.00379512	0.00728524	0.00202689	0.0123544	0.004131	0.00146322	0.00420822	0.00315809	0.0112541	0.0102889	0.00246702	0.00115822	0.000440126	0.13164	0.00149797	0.000752846	0.0221839	0.00205006	0.0108217	0	0.555512	0.0100032	0.00239753	0.0405803	0.00166398	0.000795315	0.0101538	0.015165	0.00296506	0.088029
12	1	G	Plasma	Vacuum	citrate	0.5h,RT	stored immediately	until analysis	-80C	sample	none	1	1-C		0.00146931	0.0086533	0.00302145	0.000938642	0.01146	0.00492633	0.00538645	0.0036104	0.0177974	0.00313801	0.00114109	0.0039969	0.00609197	0.010276	0.0142575	0.00267789	0.00125152	5.21e-05	0.138278	0.00153066	2.15e-05	0.023601	0.00348156	0.0103005	3.07e-06	0.514201	0.0111625	0.0024601	0.0419045	0.00120244	2.76e-05	0.0114171	0.0133833	0.00280059	0.101094
13	1	I	Plasma	Free flow	EDTA	0.5h,RT	stored immediately	until analysis	-80C	sample	none	14	14-A		0.00137283	0.00607928	0.00147082	0.000459513	0.00885729	0.00363044	0.00346966	0.00160592	0.0110883	0.0026296	0.00160687	0.00288552	0.00366469	0.0058205	0.0101055	0.00158784	0.000362473	0.000841014	0.143193	0.00124344	2.28e-05	0.0226931	0.00237368	0.0108257	0.000232135	0.561293	0.00977346	0.00344778	0.0493886	0.000697357	0.00221004	0.00895908	0.0108447	0.00119873	0.087376
13	1	I	Plasma	Free flow	EDTA	0.5h,RT	stored immediately	until analysis	-80C	sample	none	14	14-B		0.000672902	0.0034755	0.000601796	0.000639951	0.00425073	0.00161462	0.0015227	0.000740539	0.00649142	0.00170653	0.000610468	0.00178458	0.00107005	0.00318068	0.00597114	0.000733602	0.000475194	0.000473459	0.106747	0.000790833	0	0.0154455	0.00252338	0.00777479	7.63e-05	0.598671	0.00749731	0.0035258	0.0498953	0.000610468	0.00164757	0.0100675	0.0108566	0.00146894	0.124672
13	1	I	Plasma	Free flow	EDTA	0.5h,RT	stored immediately	until analysis	-80C	sample	none	14	14-C		0.0015811	0.00498667	0.00145121	0.000649461	0.00750538	0.00227535	0.00319356	0.00173638	0.00852362	0.00253663	0.00101226	0.00334435	0.00276655	0.00555551	0.00855348	0.00110035	0.000313533	0.000283673	0.130489	0.00120486	3.43e-05	0.0205424	0.00282777	0.011217	8.66e-05	0.572013	0.00844449	0.00360563	0.0490366	0.00184686	0.00212008	0.010142	0.0113365	0.00138402	0.0972938
14	1	J	Plasma	Free flow	Li heparin	0.5h,RT	stored immediately	until analysis	-80C	sample	none	13	13-A		0.00280716	0.0128441	0.00285476	0.000839998	0.0125508	0.00528108	0.00369937	0.00302829	0.0172576	0.00408789	0.0026321	0.00459312	0.00478507	0.00933058	0.0144535	0.00149111	0.000975135	0.000396197	0.15717	0.00217754	8.91e-05	0.0229533	0.00486032	0.0115051	0.000102888	0.522103	0.0112517	0.00295151	0.041186	0.00162011	0.00280716	0.00873168	0.0113484	0.000597366	0.0783594
14	1	J	Plasma	Free flow	Li heparin	0.5h,RT	stored immediately	until analysis	-80C	sample	none	13	13-B		0.00188431	0.00770886	0.00113903	0.000790252	0.0083495	0.00371079	0.00404121	0.00216057	0.0145926	0.00363828	0.00186228	0.00466992	0.00355843	0.00859089	0.0126275	0.00242032	0.00139877	0.000483697	0.15263	0.00269842	1.28e-05	0.0259012	0.00700396	0.0116344	0.000272596	0.514163	0.0115564	0.00439732	0.0415768	0.00150708	0.00341341	0.0107193	0.0134563	0.00187054	0.0917858
14	1	J	Plasma	Free flow	Li heparin	0.5h,RT	stored immediately	until analysis	-80C	sample	none	13	13-C		0.00229634	0.014416	0.00411107	0.00118665	0.0144955	0.00660601	0.00529027	0.00244529	0.0204188	0.0043196	0.00245274	0.00373124	0.00567506	0.00927969	0.0164617	0.00238571	0.000898676	0.000935914	0.15592	0.00183955	0	0.0270198	0.00363194	0.0129141	0.000355002	0.503665	0.0119261	0.00274319	0.0469794	0.00127106	0.00177501	0.0102355	0.0102454	0.00142745	0.0735971
15	1	K	Plasma	Free flow	citrate	hemolysis	stored immediately	until analysis	-80C	sample	hemolysis	15	15-A	175	0.00173837	0.00793137	0.00187744	0.000399549	0.0106918	0.0051555	0.00392375	0.00246462	0.0141354	0.0033774	0.00206507	0.00501423	0.00455287	0.00943575	0.0143253	0.00203306	0.000809031	0.000639057	0.151075	0.00255071	0.000108165	0.0286936	0.00809583	0.0120218	2.98e-05	0.529955	0.0123882	0.00330014	0.045404	0.00199333	0.00132006	0.0108209	0.011801	0.00126818	0.0752896
15	1	K	Plasma	Free flow	citrate	hemolysis	stored immediately	until analysis	-80C	sample	hemolysis	15	15-B	175	0.00231985	0.00702427	0.00157426	0.000728323	0.0117568	0.00286798	0.00424586	0.00273094	0.00989117	0.00251083	0.00161094	0.00508532	0.00401171	0.00835144	0.00952863	0.00227237	0.000515761	0.000934412	0.129887	0.00140701	0.000105742	0.0232546	0.00969695	0.012388	0	0.515231	0.0101998	0.00323268	0.0475504	0.00235653	0.00145233	0.0132253	0.013208	0.00203607	0.113311
15	1	K	Plasma	Free flow	citrate	hemolysis	stored immediately	until analysis	-80C	sample	hemolysis	15	15-C	175	0.00253408	0.00688342	0.00225693	0.000622754	0.00882788	0.00379063	0.00601554	0.00241041	0.0125633	0.00357532	0.00195991	0.00592169	0.00369126	0.011214	0.0107944	0.0030696	0.00132943	0.00104897	0.144181	0.00213327	0.000205376	0.0251763	0.00926844	0.0135979	0.000426211	0.51185	0.012815	0.00345607	0.0467596	0.00228343	0.00236404	0.0133274	0.0128062	0.0015348	0.089119
1	2	F	Serum	Free flow	clot activator	0.5h,RT	stored immediately	until analysis	-80C	reference	none	18	18-A		0.0010969	0.00777765	0.00119944	0.000308671	0.0126961	0.00527838	0.00362501	0.00376493	0.0143227	0.00237003	0.00217672	0.0041772	0.00621079	0.00745082	0.00930818	0.00309418	0.000540441	0.000951646	0.118095	0.0030803	0.000324692	0.0336974	0.00470055	0.0117743	0.000320419	0.559195	0.0195253	0.00344985	0.0426083	0.000970871	0.000314011	0.0138816	0.0096019	0.000647247	0.0807991
1	2	F	Serum	Free flow	clot activator	0.5h,RT	stored immediately	until analysis	-80C	reference	none	18	18-B		0.00182152	0.00679301	0.00162988	0.00129125	0.0112528	0.00435564	0.00378258	0.00235365	0.0103579	0.00170802	0.00170988	0.00301416	0.00438727	0.00553339	0.00673906	0.00251738	0.000455844	0.000708885	0.0967321	0.00157778	0	0.0258864	0.00416958	0.00751492	0	0.564468	0.0159378	0.00236667	0.0413032	0.00269785	0.00176756	0.014427	0.011932	0.00135079	0.120884
1	2	F	Serum	Free flow	clot activator	0.5h,RT	stored immediately	until analysis	-80C	reference	none	18	18-C		0.0013004	0.0122283	0.00176684	0.000879888	0.0179918	0.00584295	0.00500017	0.00369624	0.0158786	0.00281458	0.00223506	0.00574401	0.007002	0.00783772	0.0117937	0.00407434	0.000786245	0.0010283	0.1329	0.00272977	0.000233223	0.0351938	0.00475634	0.0111435	0.000279161	0.561264	0.0182427	0.0026909	0.0393193	0.00083395	0.000931127	0.0107035	0.00931303	0.000856919	0.0552086
2	2	A	Serum	Free flow	clot activator	6h,RT	stored immediately	until analysis	-80C	sample	none	19	19-A		0.00250203	0.0104821	0.00216281	0.000227348	0.0129504	0.00603495	0.00488498	0.00311792	0.0128951	0.00279554	0.00195953	0.00395393	0.00474304	0.00730281	0.0082134	0.0027775	0.000319972	0.000241783	0.0937216	0.00239979	0	0.0229562	0.0059736	0.00724627	0.000251406	0.543505	0.0200223	0.0041897	0.0412246	0.00116321	0.000753016	0.0136998	0.0119809	0.00111509	0.123045
2	2	A	Serum	Free flow	clot activator	6h,RT	stored immediately	until analysis	-80C	sample	none	19	19-B		0.00165771	0.0138413	0.00223923	0.000696692	0.0177949	0.00710286	0.0036515	0.00380443	0.0153537	0.00303977	0.00152932	0.0037931	0.00495614	0.00565472	0.00791661	0.0020542	0.000681587	7.36e-05	0.0930848	0.00264328	0.000443693	0.0246108	0.00464272	0.00609653	0.000128388	0.556273	0.0185445	0.00181631	0.0384785	0.000309641	0.000913818	0.011908	0.0110055	0.000961019	0.116085
2	2	A	Serum	Free flow	clot activator	6h,RT	stored immediately	until analysis	-80C	sample	none	19	19-C		0.00333233	0.0265655	0.00418957	0.00139593	0.0291802	0.0167475	0.00487142	0.00664675	0.0413283	0.0064141	0.00592195	0.00436137	0.0126421	0.0101169	0.0250944	0.00914868	0.00217084	0.000218337	0.124064	0.00664138	0.000391933	0.0383003	0.00278827	0.0113338	5.73e-05	0.444405	0.0311596	0.0040446	0.0370976	0.00107737	0.000501102	0.0105571	0.0102332	0.00104158	0.057573
3	2	B	Serum	Free flow	clot activator	2h,RT	stored immediately	until analysis	-80C	sample	none	20	20-A		0.000660352	0.0145359	0.000981055	0.000177267	0.017747	0.00595805	0.00175913	0.00339648	0.0168823	0.00195129	0.00147767	0.00267388	0.00539648	0.00361164	0.011912	0.00201759	0.000179973	0.000779432	0.0977212	0.00195941	0.000284168	0.031134	0.00297023	0.00785927	8.93e-05	0.584694	0.0186225	0.00296482	0.0413924	0.000867388	0.00085115	0.0109973	0.00943843	0.000684709	0.0874723
3	2	B	Serum	Free flow	clot activator	2h,RT	stored immediately	until analysis	-80C	sample	none	20	20-B		0.000757252	0.00955628	0.00126293	0.000405731	0.0121042	0.00458332	0.00212776	0.0032594	0.0129521	0.00157803	0.00162377	0.00217943	0.00507206	0.00455791	0.00834078	0.00270713	0.000315945	0.000553116	0.0834781	0.0023158	0.000193125	0.0271569	0.00312472	0.00828657	4.15e-05	0.55686	0.0186264	0.00194056	0.0419775	0.00100035	0.00104779	0.0162098	0.0124667	0.00118077	0.129739
3	2	B	Serum	Free flow	clot activator	2h,RT	stored immediately	until analysis	-80C	sample	none	20	20-C		0.00149687	0.0170462	0.00107881	0.000468882	0.0212979	0.00732041	0.0039658	0.00518058	0.0214466	0.00326566	0.00177133	0.00367228	0.0100193	0.00781597	0.013764	0.00294544	0.00115124	0.00121223	0.123913	0.00217287	0	0.0321686	0.00226309	0.00625176	8.51e-05	0.55346	0.0154375	0.00143714	0.0310085	0.00119571	0.00083611	0.00944118	0.00766349	0.00101909	0.0781686
4	2	C	Serum	Free flow	clot activator	2h,4C	stored immediately	until analysis	-80C	sample	none	21	21-A		0.00220858	0.0145275	0.00137832	0.000932512	0.0189202	0.00681388	0.00798361	0.00503883	0.016319	0.0034642	0.00158691	0.00436808	0.00699793	0.008229	0.0101104	0.00270346	0.000965231	0.000613494	0.114793	0.00348874	0	0.0287933	0.00277299	0.00667482	0.000163599	0.556705	0.016957	0.0037505	0.0349528	0.000773003	0.00182003	0.0102045	0.0102249	0.000523515	0.0842369
4	2	C	Serum	Free flow	clot activator	2h,4C	stored immediately	until analysis	-80C	sample	none	21	21-B		0.000705054	0.00878968	0.00108805	0.000320321	0.0112617	0.00328329	0.00213779	0.00304653	0.00963226	0.00205423	0.00133525	0.00212213	0.00460809	0.00600428	0.00774863	0.00208209	0	0.00116116	0.0931611	0.0021169	5.57e-05	0.0260992	0.00400401	0.00757106	0.000372547	0.578275	0.0188572	0.00219002	0.0390217	0.000962704	0.00125865	0.0154624	0.0144197	0.000990557	0.114835
4	2	C	Serum	Free flow	clot activator	2h,4C	stored immediately	until analysis	-80C	sample	none	21	21-C		0.0036495	0.00765928	0.00196674	0.00109358	0.0147379	0.005239	0.00580698	0.00384871	0.0142843	0.00313662	0.0019837	0.00451842	0.00557385	0.0101643	0.00910043	0.00220411	0.00111901	0.00128432	0.115389	0.00342061	5.93e-05	0.0223463	0.00283143	0.00844767	0.000627323	0.590578	0.016552	0.00164884	0.0365797	0.000868928	0.000856212	0.0101813	0.0119403	0.000877405	0.0716505
5	2	D	Serum	Free flow	clot activator	0.5h,RT	6h,RT	until analysis	-80C	sample	none	26	26-A		0.00395626	0.0340804	0.00625536	0.00127158	0.0395626	0.00872263	0.0116903	0.00871238	0.0195352	0.00463307	0.0031728	0.00511914	0.0136039	0.0127712	0.0127814	0.00458384	0.000879852	0.000449155	0.135083	0.0034989	0.00019689	0.0363836	0.00225808	0.00857907	0.00091882	0.492912	0.0217297	0.00257803	0.0407111	0.000982399	0.00067886	0.00915128	0.00687679	0.00032815	0.0413264
5	2	D	Serum	Free flow	clot activator	0.5h,RT	6h,RT	until analysis	-80C	sample	none	26	26-B		0.00403738	0.018512	0.00300001	0.000934717	0.0265449	0.00648764	0.0101306	0.00582847	0.0146813	0.00444801	0.00270555	0.00372671	0.00842326	0.0127889	0.00934177	0.00359029	0.00105628	0.000494373	0.127334	0.00275688	0.000272851	0.0301906	0.000543	0.00734941	0	0.529189	0.0200424	0.00225305	0.0414598	0.00166277	0.000913105	0.0114841	0.00775329	0.000875284	0.0723177
5	2	D	Serum	Free flow	clot activator	0.5h,RT	6h,RT	until analysis	-80C	sample	none	26	26-C		0.00318577	0.019553	0.00284834	0.00139109	0.0265018	0.00708942	0.00837795	0.00613005	0.0152143	0.00445942	0.00337434	0.00328006	0.0105895	0.012538	0.0102239	0.00475219	0.00132989	0.000693063	0.132287	0.00367538	0.000645094	0.0317634	0.00138447	0.00989971	0.000375478	0.523848	0.0233888	0.00431882	0.0392267	0.00116944	0.00119756	0.0117672	0.00857148	0.000769151	0.0566955
6	2	E	Serum	Free flow	gel	0.5h,RT	6h,RT	until analysis	-80C	sample	none	27	27-A		0.00134165	0.0137794	0.00156159	0.000285925	0.0181526	0.0034421	0.00428154	0.00405427	0.00764666	0.00373169	0.00259165	0.00311218	0.00690618	0.00668258	0.00610706	0.00260632	0.000905429	0.00127567	0.110037	0.00416057	0	0.034124	1.83e-05	0.0091166	0	0.564353	0.0238014	0.00264664	0.0401908	0.00130866	0.000109971	0.0130132	0.011481	0.00115836	0.085092
6	2	E	Serum	Free flow	gel	0.5h,RT	6h,RT	until analysis	-80C	sample	none	27	27-B		0.000910938	0.00653272	0.000778064	0.000563001	0.00844638	0.00177256	0.00269583	0.00177667	0.00469304	0.00126983	0.00162736	0.00216159	0.00347252	0.00538892	0.00296431	0.0017438	0.000554782	0.00102737	0.0839515	0.00179037	2.88e-05	0.0239748	0.00316568	0.00958745	0.000123285	0.587249	0.0190708	0.00264925	0.0416442	0.00256569	0.00134654	0.0171927	0.0145709	0.00115614	0.125193
6	2	E	Serum	Free flow	gel	0.5h,RT	6h,RT	until analysis	-80C	sample	none	27	27-C		0.00230013	0.0166397	0.00336172	0.000739901	0.016873	0.0044957	0.00456808	0.00344215	0.00977956	0.00287114	0.0018015	0.00373972	0.00430268	0.00593529	0.00450374	0.00157631	0.000932918	0.000554926	0.0928173	0.00156023	0.000450374	0.0240066	0.00304807	0.00633741	0.000490586	0.592669	0.0196235	0.00473697	0.035467	0.00223579	0.00136721	0.0114282	0.00749552	0.000715774	0.0938789
7	2	F	Serum	Free flow	clot activator	0.5h,RT	stored immediately	2 M	-80C	sample	none	25	25-A		0.000813073	0.00864601	0.00153994	0.000658296	0.0104583	0.00603438	0.00523894	0.00288984	0.0140613	0.00409867	0.00199252	0.00285261	0.00509004	0.00840894	0.00999003	0.00334046	0.000903197	0.000260575	0.109334	0.00258028	0.000407516	0.031512	0.00196901	0.010278	6.66e-05	0.562964	0.0216199	0.00247057	0.0457065	0.00216493	0.00137929	0.0150037	0.0135107	0.00104818	0.0823026
7	2	F	Serum	Free flow	clot activator	0.5h,RT	stored immediately	2 M	-80C	sample	none	25	25-B		0.00111283	0.0103917	0.00116573	0.000736666	0.0153857	0.00594622	0.00502147	0.00417117	0.0138889	0.00381264	0.00113439	0.00332871	0.00705906	0.00690624	0.00956882	0.00275858	0.000677889	0.000493723	0.115572	0.00367941	0	0.0341883	0.00191611	0.00878317	0.000615194	0.556766	0.0184695	0.00276054	0.0415021	0.00107169	0.00168297	0.0136459	0.0128701	0.00114222	0.0822675
7	2	F	Serum	Free flow	clot activator	0.5h,RT	stored immediately	2 M	-80C	sample	none	25	25-C		0.00355408	0.0226308	0.00637852	0.000419743	0.0317945	0.00963055	0.0106505	0.00669627	0.0265379	0.00545666	0.00403267	0.00511929	0.0120352	0.0120705	0.0167387	0.00613531	0.000137299	0.000317749	0.138256	0.00260868	1.96e-05	0.0387733	0.00228309	0.00982669	0.00108662	0.480963	0.0186491	0.00231447	0.0418527	0.0021654	0.000447203	0.0109643	0.0101758	0.00128276	0.0486313
8	2	F	Serum	Free flow	clot activator	0.5h,RT	stored immediately	2 M	-20C	sample	none	24	24-A		0.00237497	0.0135967	0.00262993	0.00109069	0.0179594	0.00644971	0.00808968	0.00488057	0.0189777	0.00516701	0.00273381	0.00255124	0.00764428	0.0118717	0.0129577	0.00371748	0.000904975	0.000650008	0.124491	0.0034814	0.000560297	0.0356292	0.00179893	0.00957699	0.000332086	0.531494	0.0209183	0.00375525	0.0404516	0.0019453	0.000469013	0.0122809	0.0121125	0.00119929	0.0678227
8	2	F	Serum	Free flow	clot activator	0.5h,RT	stored immediately	2 M	-20C	sample	none	24	24-B		0.00427439	0.017182	0.00298616	0.000553305	0.0200964	0.00739571	0.00676637	0.00555839	0.0249705	0.00549504	0.00254267	0.00385624	0.00738303	0.0134187	0.0152771	0.00512758	0.000891202	0.000984123	0.13814	0.0035817	0	0.0395592	0.00151209	0.00867549	2.96e-05	0.540989	0.0223138	0.00303684	0.0354496	0.00196825	0.000409699	0.0103354	0.00833337	0.000359015	0.0364506
8	2	F	Serum	Free flow	clot activator	0.5h,RT	stored immediately	2 M	-20C	sample	none	24	24-C		0.00288918	0.0126252	0.00266717	0.000917442	0.0163954	0.00529177	0.00960729	0.00529379	0.0163477	0.00454768	0.00212583	0.00311322	0.00742875	0.0129871	0.0105764	0.00417158	0.00109992	0.000860672	0.12201	0.00385833	0.000225052	0.0333533	0.00174263	0.00985465	0	0.538596	0.0210069	0.0035248	0.0393365	0.0022414	0.000712665	0.0132416	0.0129304	0.000872837	0.0708022
9	2	F	Serum	Free flow	clot activator	0.5h,RT	24h,4C	until analysis	-80C	sample	none	22	22-A		3.22e-05	0.0063579	0.00024604	2.1e-05	0.00789426	0.00154334	0.00122181	0.00218361	0.00544504	0.0010974	0.00138118	0.00199768	0.003144	0.00336208	0.00378147	0.00189843	0.000529825	0.000696182	0.0842772	0.00182014	0	0.0275062	0.00181455	0.00911188	0.000257224	0.583759	0.0215481	0.00341381	0.0438693	0.00169013	0.00185509	0.0171907	0.0136035	0.00110439	0.128406
9	2	F	Serum	Free flow	clot activator	0.5h,RT	24h,4C	until analysis	-80C	sample	none	22	22-B		0.00118215	0.00940926	0.000631011	0.000330149	0.011293	0.00265318	0.00209405	0.00311911	0.0055127	0.00157886	0.00157487	0.00259993	0.00449962	0.00562585	0.00434652	0.00230572	0.000463274	0.000428662	0.0802702	0.00292874	0.00050188	0.023804	0.00239758	0.00801677	0.000205012	0.535395	0.0223623	0.00284887	0.0410024	0.00167471	0.000688255	0.0184604	0.0161574	0.00124871	0.15691
9	2	F	Serum	Free flow	clot activator	0.5h,RT	24h,4C	until analysis	-80C	sample	none	22	22-C		0.00158172	0.00947282	0.00230029	0.00107785	0.0120097	0.00141523	0.00341757	0.00293123	0.00596761	0.00167812	0.00131883	0.00496425	0.00369361	0.00692278	0.0052841	0.00141523	5.26e-05	0.000543307	0.0888044	0.00190157	0.000569596	0.0212065	0.00513513	0.0073916	0.000683515	0.548293	0.0183804	0.0037199	0.0369449	0.000801816	0.000359284	0.0178985	0.0147876	0.0022258	0.141106
10	2	F	Serum	Free flow	clot activator	0.5h,RT	48h,4C	until analysis	-80C	sample	none	23	23-A		0.000617749	0.0090997	0.000846169	0.00067626	0.0140304	0.00283669	0.00124788	0.00278381	0.00742986	0.00177223	0.0026274	0.00163945	0.00546184	0.00394391	0.00530544	0.00292446	0.00014853	0.000509727	0.0920063	0.00371437	0	0.0325663	0.000803411	0.0101315	0.000237423	0.540422	0.0311935	0.00302236	0.0454749	0.000748275	0.00173622	0.0171687	0.0121749	0.00131989	0.125584
10	2	F	Serum	Free flow	clot activator	0.5h,RT	48h,4C	until analysis	-80C	sample	none	23	23-B		0.000517556	0.00860409	0.000293102	0.000413428	0.0105949	0.00177481	0.000885477	0.00186891	0.00609575	0.0010274	0.00138221	0.00162749	0.00395842	0.00295262	0.00395225	0.00181338	0.000500587	0.000668735	0.0753303	0.00216973	0.000161206	0.0256302	0.00164831	0.00854855	0.000180489	0.530973	0.0252415	0.00308837	0.0457956	0.00155498	0.00112459	0.0227578	0.0117626	0.00132821	0.163778
10	2	F	Serum	Free flow	clot activator	0.5h,RT	48h,4C	until analysis	-80C	sample	none	23	23-C		0.000687304	0.013237	0.000892643	0.000212313	0.0188586	0.00231994	0.00160474	0.0041246	0.00717136	0.00164968	0.00137616	0.00245709	0.00719306	0.00522181	0.00549223	0.0026818	0.000712099	0.00100887	0.0976754	0.00273449	0	0.0321406	0.00229437	0.00965402	0	0.559138	0.0257014	0.00298167	0.0466235	0.000836078	0.000719073	0.0165751	0.00897602	0.000729146	0.102683
11	2	H	Plasma	Free flow	citrate	0.5h,RT	stored immediately	until analysis	-80C	reference	none	17	17-A		0.00119544	0.0075862	0.00147499	0.000432093	0.0114546	0.00430944	0.00280892	0.00293913	0.0120386	0.00192559	0.00160966	0.0040101	0.00394245	0.00618142	0.00887227	0.00261234	0.000361248	0.000251469	0.105993	0.00267425	0	0.0289911	0.00945052	0.00864697	8.23e-05	0.533655	0.0211502	0.0035461	0.042714	0.00130521	0.000700157	0.0157762	0.0136412	0.00103587	0.118821
11	2	H	Plasma	Free flow	citrate	0.5h,RT	stored immediately	until analysis	-80C	reference	none	17	17-B		0.00333727	0.0110942	0.00186175	0.000684569	0.0154213	0.00675549	0.00379982	0.00357548	0.021032	0.00424155	0.00316382	0.00529847	0.00572401	0.00932262	0.0129906	0.00484749	0.00155184	0.000314532	0.123639	0.00515045	0.0001272	0.0350009	0.00673236	0.0103472	0.000689194	0.488858	0.0251186	0.00473416	0.0396079	0.00198201	0.0014894	0.014857	0.0142279	0.00121881	0.0962305
11	2	H	Plasma	Free flow	citrate	0.5h,RT	stored immediately	until analysis	-80C	reference	none	17	17-C		0.00275187	0.012426	0.00250882	0.00124411	0.0161789	0.00670117	0.00370212	0.00361973	0.0179751	0.00352361	0.00222457	0.00416763	0.00546118	0.00847945	0.0113151	0.00432006	0.00101341	0.000438048	0.112555	0.00300729	0.000587726	0.0291542	0.00620407	0.00916879	0.000782719	0.503246	0.0218475	0.00315696	0.0408716	0.00174258	0.00099831	0.0151957	0.0133227	0.00120017	0.1115
12	2	G	Plasma	Vacuum	citrate	0.5h,RT	stored immediately	until analysis	-80C	sample	none	16	16-A		0.00420713	0.0176108	0.00344005	0.00109487	0.0230818	0.00809662	0.0100768	0.00519049	0.0190352	0.00472584	0.0024719	0.00547772	0.00828248	0.0130286	0.0120047	0.00266959	0.00105432	0.000297372	0.120561	0.0022286	0.000419024	0.0258088	0.00246683	0.00658948	2.87e-05	0.496839	0.0163571	0.00135169	0.0370346	0.0014801	0.000775532	0.0118459	0.010947	0.00107797	0.106315
12	2	G	Plasma	Vacuum	citrate	0.5h,RT	stored immediately	until analysis	-80C	sample	none	16	16-B		0.00731717	0.041112	0.00338126	0.00238171	0.04242	0.0131395	0.0117454	0.00786885	0.0273141	0.00285331	0.00234316	0.00323889	0.00930441	0.0116535	0.015447	0.00373126	0.000287704	0.000777098	0.127106	0.00112709	0.000910569	0.0237934	0.00134657	0.00661423	0.000575408	0.498472	0.0168618	0.00303424	0.0318165	0.0015364	0	0.00850062	0.00594391	0.00059617	0.0587598
12	2	G	Plasma	Vacuum	citrate	0.5h,RT	stored immediately	until analysis	-80C	sample	none	16	16-C		0.00512802	0.0189841	0.00322795	0.00180322	0.0242816	0.00604684	0.00875867	0.00444369	0.0175416	0.00202368	0.00203515	0.00427548	0.00591175	0.0116387	0.0104459	0.00327638	0.000721287	0.000498275	0.102851	0.00172166	0	0.0225014	0.00234355	0.0077978	0	0.518871	0.0174294	0.00166431	0.0405845	0.00240472	0.000349174	0.0147061	0.00921999	0.000300749	0.109734
13	2	I	Plasma	Free flow	EDTA	0.5h,RT	stored immediately	until analysis	-80C	sample	none	29	29-A		0.00296897	0.0138831	0.00293002	0.00102461	0.0267417	0.00406248	0.00403552	0.00713931	0.0174962	0.00254055	0.00303788	0.00404451	0.0133409	0.00458378	0.00812497	0.00481746	0.000632142	0.0005153	0.103827	0.00274427	0	0.0299294	0.00283415	0.00935929	0.000347528	0.55209	0.0253755	0.002208	0.0474046	0.000215707	0.000299593	0.0136525	0.00634838	0.000638133	0.070704
13	2	I	Plasma	Free flow	EDTA	0.5h,RT	stored immediately	until analysis	-80C	sample	none	29	29-B		0.00197667	0.0205035	0.00240405	0.000632177	0.0241741	0.00678923	0.00213249	0.00505074	0.0150075	0.00138233	0.00103063	0.00395556	0.00758168	0.00502403	0.00927565	0.00286038	0.000458551	0.000776866	0.103256	0.0019455	2.89e-05	0.026567	0.00304736	0.00736353	0.000191434	0.554809	0.0241385	0.00286261	0.0441478	0.000963848	0.000396224	0.0136185	0.00708751	0.000532008	0.0867218
13	2	I	Plasma	Free flow	EDTA	0.5h,RT	stored immediately	until analysis	-80C	sample	none	29	29-C		0.0012977	0.007494	0.0017231	0.000255673	0.013194	0.00364172	0.00267704	0.00212488	0.00925793	0.00137505	0.0015813	0.00269638	0.00428628	0.00419174	0.00577304	0.00155982	0.000500603	0.000926007	0.0890836	0.00155552	0.000165435	0.0199145	0.00592344	0.00754342	9.24e-05	0.586135	0.0186899	0.00251805	0.0441089	0.000644553	0.00040392	0.0137204	0.00829325	0.000571503	0.121099
14	2	J	Plasma	Free flow	Li heparin	0.5h,RT	stored immediately	until analysis	-80C	sample	none	28	28-A		0.00185786	0.00976559	0.00208691	0.000781683	0.0154682	0.00635345	0.00579173	0.0025941	0.0147265	0.00287041	0.00148338	0.00464465	0.00575901	0.0074678	0.0113544	0.00212872	0.000890755	0.000459921	0.124113	0.00220144	0.000389024	0.0267408	0.00327034	0.00631164	5.45e-05	0.570912	0.014423	0.00233414	0.0327071	0.00162336	0.000843491	0.0100746	0.00958562	0.00110345	0.0865505
14	2	J	Plasma	Free flow	Li heparin	0.5h,RT	stored immediately	until analysis	-80C	sample	none	28	28-B		0.00201364	0.01508	0.00146325	0.000861392	0.0188969	0.00635416	0.00428682	0.00426221	0.018445	0.00283252	0.00260655	0.00368944	0.00720437	0.0075892	0.0122362	0.00273856	0.000299809	0.000971024	0.119205	0.00193981	0.000530259	0.0306163	0.00345899	0.00710592	0.000319946	0.557164	0.0167155	0.00279897	0.035722	0.000977736	0.000476562	0.0107036	0.00862063	0.000351269	0.0832821
14	2	J	Plasma	Free flow	Li heparin	0.5h,RT	stored immediately	until analysis	-80C	sample	none	28	28-C		0.0027614	0.00893891	0.00224283	0.000877254	0.0137379	0.00511875	0.00433657	0.00264256	0.0152439	0.00250644	0.00136558	0.00511875	0.00496966	0.00915931	0.010903	0.00332319	0.000998254	0.00113006	0.124134	0.00212399	0.000293858	0.0313175	0.00452888	0.00768569	0.00132668	0.55592	0.0175904	0.00438843	0.0351831	0.00103067	0.00146281	0.0104125	0.0110089	0.000749771	0.0852902
15	2	K	Plasma	Free flow	citrate	hemolysis	stored immediately	until analysis	-80C	sample	hemolysis	30	30-A	133	0.00151508	0.0142235	0.00187748	0.000708054	0.023247	0.00821799	0.003388	0.00517412	0.0230232	0.00390419	0.00293119	0.00841442	0.00953969	0.00642882	0.0164192	0.00301037	0.000598419	0.000921231	0.146933	0.00334841	0.000108111	0.0359021	0.00802004	0.00963866	6.24e-05	0.527485	0.0163355	0.00245915	0.0349337	0.000331948	0.00138718	0.0082926	0.00641816	0.000602988	0.0569793
15	2	K	Plasma	Free flow	citrate	hemolysis	stored immediately	until analysis	-80C	sample	hemolysis	30	30-B	133	0.00121478	0.00924635	0.00149556	0.000600564	0.013267	0.00517304	0.00263819	0.00303987	0.014318	0.00286438	0.000735106	0.00441259	0.00606999	0.00614019	0.00953688	0.00346689	0.00067271	0.000432874	0.123675	0.00251145	0	0.0315706	0.00702543	0.0101062	0	0.557523	0.0171083	0.00194209	0.0396606	0.00117578	0.001673	0.0124052	0.0105196	0.00138832	0.0850032
15	2	K	Plasma	Free flow	citrate	hemolysis	stored immediately	until analysis	-80C	sample	hemolysis	30	30-C	133	0.00116878	0.00882256	0.00149331	0.000131629	0.012675	0.00467284	0.00221387	0.00291627	0.0138358	0.00276989	0.00177813	0.00463085	0.00583027	0.00587339	0.0100095	0.00314549	0.000667224	0.000569637	0.110276	0.00283457	0	0.0295791	0.00611849	0.0112736	0.000133899	0.523395	0.0222794	0.00217529	0.0444646	0.00132424	0.00141274	0.01788	0.0133513	0.000959986	0.111329
1	3	F	Serum	Free flow	clot activator	0.5h,RT	stored immediately	until analysis	-80C	reference	none	33	33-A		0.00416184	0.0522531	0.0104151	0.000397275	0.0457344	0.0101821	0.00981154	0.00605844	0.0250379	0.00484943	0.00214681	0.0067976	0.010396	0.0099567	0.0130127	0.00171707	0.000540523	0.00135226	0.13333	0.00180493	0	0.0286401	0.00169797	0.00526007	0.000315146	0.539136	0.00841917	0.00079073	0.033818	0.000536703	0.000712421	0.00411218	0.00250016	0.00074298	0.0148959
1	3	F	Serum	Free flow	clot activator	0.5h,RT	stored immediately	until analysis	-80C	reference	none	33	33-B		0.0022047	0.0186544	0.002071	0.00145394	0.0205917	0.00740084	0.00709102	0.00282818	0.0173445	0.0039466	0.00166863	0.00365735	0.00449424	0.00909775	0.0127667	0.00232168	0.000919159	0.00101943	0.123786	0.000676192	6.3e-05	0.0279617	0.00156064	0.00497374	0	0.590963	0.00997577	0.00434383	0.0369746	0.000631199	0.00141409	0.00638141	0.00646497	0.00191031	0.040506
1	3	F	Serum	Free flow	clot activator	0.5h,RT	stored immediately	until analysis	-80C	reference	none	33	33-C		0.00112761	0.0120372	0.00131741	0.00130996	0.0165495	0.00475048	0.00648284	0.00225336	0.011131	0.00249154	0.00181609	0.0031521	0.00511333	0.00761975	0.0071341	0.00221987	0.00100666	0.000876411	0.124716	0.000828032	0.000184214	0.025081	0.0017491	0.00505937	0	0.661839	0.00366753	0.00277995	0.0366939	0.000279112	0.000664286	0.0045365	0.0039485	0.0014365	0.0258104
2	3	A	Serum	Free flow	clot activator	6h,RT	stored immediately	until analysis	-80C	sample	none	34	34-A		0.000109245	0.00718493	0.000328574	0.000210086	0.00925722	0.00196724	0.00160337	0.00150421	0.00654795	0.00158909	0.00101681	0.00231178	0.00243195	0.00427735	0.00657569	0.00176472	0.000533618	0.00151346	0.100221	0.00183951	0	0.0285868	0.00272355	0.00601854	7.48e-05	0.643594	0.011111	0.00433701	0.039339	0.000553786	0.000805049	0.00855721	0.00848242	0.00253027	0.0584459
2	3	A	Serum	Free flow	clot activator	6h,RT	stored immediately	until analysis	-80C	sample	none	34	34-B		0.00074478	0.00954469	0.000378702	0.000357663	0.0112923	0.00190052	0.00194961	0.00231008	0.00618686	0.00130302	0.000639585	0.00232411	0.00301559	0.00415029	0.00564967	0.00118239	0.000966391	0.000899066	0.0989408	0.00168172	0.000199169	0.0244445	0.00214738	0.00373232	0.000293143	0.655113	0.00858671	0.00335221	0.0357705	0.000914495	0.000238442	0.00659502	0.00827253	0.00233673	0.0587437
2	3	A	Serum	Free flow	clot activator	6h,RT	stored immediately	until analysis	-80C	sample	none	34	34-C		1.06e-05	0.0109576	0.000332369	0.000190357	0.011432	0.00323456	0.00181292	0.00164221	0.00781522	0.00122372	0.000888333	0.00196702	0.00268615	0.00429965	0.00698731	0.00179933	9.97e-05	0.000580136	0.0886052	0.00140804	0.000122372	0.0269355	0.0022722	0.00535568	0	0.616403	0.0106434	0.00245651	0.0411458	0.000513662	0.00163465	0.00909182	0.00953296	0.0028342	0.07701
3	3	B	Serum	Free flow	clot activator	2h,RT	stored immediately	until analysis	-80C	sample	none	35	35-A		0.00413906	0.0288522	0.00418535	0.000790124	0.0295608	0.00951676	0.00824396	0.00422612	0.0222689	0.0047694	0.00188219	0.00643119	0.00785386	0.0105383	0.016554	0.00274946	0.000560911	0.00174114	0.134721	0.00267673	0.000255661	0.0316821	0.00238139	0.00594522	1.54e-05	0.542875	0.00979556	0.00373904	0.0371777	0.000412143	0.000962034	0.00579535	0.00581298	0.00171689	0.0318805
3	3	B	Serum	Free flow	clot activator	2h,RT	stored immediately	until analysis	-80C	sample	none	35	35-B		0.00569944	0.0185072	0.00218189	0.0033849	0.0190423	0.00724552	0.00598761	0.00439122	0.0131691	0.00408475	0.00242432	0.00627121	0.00752454	0.0088785	0.00947315	0.00290461	0.000187542	0.0012762	0.113952	0.0018617	0	0.0244765	0.00438207	0.00534265	0.000773038	0.610883	0.00868638	0.00362276	0.0339954	0.00103377	0.000388806	0.00612026	0.00637642	0.00295493	0.0308621
3	3	B	Serum	Free flow	clot activator	2h,RT	stored immediately	until analysis	-80C	sample	none	35	35-C		0.00295776	0.0193268	0.0023657	0.0010317	0.0196349	0.00755099	0.00489805	0.00391576	0.019439	0.00398443	0.00220659	0.00480008	0.00552779	0.00967887	0.0140946	0.00276431	0.000489052	0.000992339	0.126659	0.00266299	0.000345853	0.0321024	0.00382783	0.00582675	0	0.557957	0.0120437	0.00366286	0.038033	0.00123686	0.00124775	0.00740109	0.0097266	0.00318135	0.0436269
4	3	C	Serum	Free flow	clot activator	2h,4C	stored immediately	until analysis	-80C	sample	none	36	36-A		0.00241905	0.0126457	0.00268406	0.000611558	0.0135698	0.00722319	0.0103761	0.00112799	0.0194	0.00300343	0.000964903	0.00286074	0.00306459	0.014127	0.0145075	0.00406347	0	0.00177352	0.111399	0.00108042	0.00133863	0.0245235	0.00142697	0.00148813	0.00173275	0.657167	0.00517107	0.00488567	0.0266436	0.000319369	0.00144735	0.00495362	0.00534774	0.00154249	0.0212754
4	3	C	Serum	Free flow	clot activator	2h,4C	stored immediately	until analysis	-80C	sample	none	36	36-B		0.00206762	0.014301	0.00436676	0.000920736	0.0144626	0.00834585	0.00929889	0.00158302	0.0219631	0.00486213	0.00126534	0.00312296	0.00360756	0.0128903	0.0147264	0.00253606	0.000296143	0.00154533	0.092499	0.00173378	0	0.0231638	0.00118457	0.00499136	0.00032845	0.598893	0.0091589	0.004356	0.0346757	0.00186301	0.000796894	0.00736589	0.00714513	0.00291297	0.0545657
4	3	C	Serum	Free flow	clot activator	2h,4C	stored immediately	until analysis	-80C	sample	none	36	36-C		0.00521511	0.0236205	0.00443066	0.00194659	0.0164806	0.00986367	0.0123986	0.00127835	0.0241653	0.0046413	0.00221533	0.00509163	0.00361716	0.01059	0.0173377	0.00172868	0.000566543	0.000334115	0.0971767	0.00130014	0	0.025509	0.000326852	0.00462677	0.00149626	0.588014	0.0113962	0.00321041	0.031356	0.0015471	0.00103866	0.00633366	0.00799698	0.00337747	0.0440669
5	3	D	Serum	Free flow	clot activator	0.5h,RT	6h,RT	until analysis	-80C	sample	none	41	41-A		0.000760222	0.0134164	0.00104205	0.000670227	0.0172009	0.00506815	0.00333693	0.0025696	0.0136627	0.00380822	0.00244882	0.00163412	0.00512025	0.00612204	0.0124667	0.00262881	0.000836008	0.000918898	0.134237	0.00288458	0	0.033959	0.00175017	0.00665964	9.47e-05	0.586098	0.0118415	0.00447844	0.0340963	0.000409715	0.00128125	0.00725171	0.00908951	0.00298879	0.0431527
5	3	D	Serum	Free flow	clot activator	0.5h,RT	6h,RT	until analysis	-80C	sample	none	41	41-B		0.000682416	0.00607651	0.000391386	0.000287685	0.00586744	0.00204892	0.00174785	0.00113736	0.00501944	0.000742629	0.00034288	0.00127953	0.00247543	0.00373656	0.00411624	0.00160568	0.000316119	0.00075601	0.0732041	0.000508467	5.35e-05	0.0189253	0.00146853	0.00431695	0.000242525	0.6329	0.0114689	0.00338197	0.038891	0.00024587	0.00104202	0.0106076	0.0105022	0.00325151	0.0925041
5	3	D	Serum	Free flow	clot activator	0.5h,RT	6h,RT	until analysis	-80C	sample	none	41	41-C		0.000580003	0.0138585	0.00201219	6.48e-06	0.0144385	0.00382024	0.00415075	0.00208671	0.011114	0.0035513	0.00100447	0.00287733	0.00267968	0.00473723	0.00842787	0.00106604	0.000356427	0.000952631	0.0956908	0.00197007	6.48e-05	0.0248235	0.00217096	0.00487656	0.00040503	0.631941	0.0141015	0.00358695	0.0392069	0.00126693	0.00133822	0.00726462	0.00736507	0.00197655	0.0534445
6	3	E	Serum	Free flow	gel	0.5h,RT	6h,RT	until analysis	-80C	sample	none	42	42-A		0.00180596	0.0117913	0.00261915	0.000711541	0.0151355	0.0043709	0.00973456	0.00202281	0.0136243	0.00386943	0.00100293	0.00389992	0.00425908	0.010026	0.0096668	0.00273774	0.000891121	0.000464196	0.126376	0.000626834	0.000189744	0.0241958	0.00142986	0.00464874	0.00135532	0.634278	0.00859948	0.00151118	0.0353297	0.000372712	0.000806413	0.00543143	0.0052383	0.00159589	0.0315552
6	3	E	Serum	Free flow	gel	0.5h,RT	6h,RT	until analysis	-80C	sample	none	42	42-B		0.00142127	0.00787672	0.00114336	0.000833748	0.00905177	0.00286692	0.00274747	0.00229646	0.00997328	0.00166993	0.00194541	0.00201123	0.00307414	0.00574116	0.0066261	0.00149928	0.000468069	0.000175526	0.0974875	0.000962954	8.04e-05	0.0213825	0.00132863	0.00481233	0.000370555	0.664963	0.00598007	0.00265239	0.0383865	0.000848375	0	0.0082229	0.00665779	0.00161386	0.0543569
6	3	E	Serum	Free flow	gel	0.5h,RT	6h,RT	until analysis	-80C	sample	none	42	42-C		0.00386728	0.0249497	0.00523815	0.00120251	0.0319003	0.00982693	0.0108996	0.00577206	0.019827	0.00634927	0.00240503	0.00368931	0.00796544	0.00755178	0.0137808	0.002583	0.00126504	0.00098606	0.141165	0.0023906	0.000745558	0.028639	0.0021549	0.00605585	0.000182782	0.580039	0.00916315	0.00271768	0.0275905	0.00236173	0.000235693	0.00347286	0.00379032	0.00208756	0.0160223
7	3	F	Serum	Free flow	clot activator	0.5h,RT	stored immediately	2 M	-80C	sample	none	40	40-A		0.0015431	0.010864	0.00223884	0.000483905	0.0118785	0.00703428	0.00821808	0.00271132	0.0192212	0.00339564	0.00160852	0.00281516	0.00386293	0.0107819	0.0130748	0.00303323	0.000547249	0.000787124	0.125907	0.00122534	2.08e-05	0.0321485	0.00232399	0.00713085	0.000669783	0.601426	0.00989824	0.00428453	0.0374621	0.000494289	0.00110384	0.0078349	0.00840499	0.00231672	0.0352814
7	3	F	Serum	Free flow	clot activator	0.5h,RT	stored immediately	2 M	-80C	sample	none	40	40-B		0.00243005	0.00773721	0.0025858	0.000937407	0.00940724	0.0053187	0.0102336	0.0020623	0.0195788	0.00393711	0.00201903	0.00438851	0.00293336	0.0143568	0.0140351	0.0033415	0.000767232	0.000248052	0.133885	0.00301701	0.000258148	0.0318502	0.00191519	0.00599652	8.36e-05	0.581115	0.0107614	0.00319584	0.0354758	0.000987883	0.00123738	0.00842513	0.00950387	0.00320305	0.0408955
7	3	F	Serum	Free flow	clot activator	0.5h,RT	stored immediately	2 M	-80C	sample	none	40	40-C		0.00125434	0.00965621	0.00157349	0.000523261	0.00979723	0.00469822	0.00371478	0.00210789	0.01621	0.00306535	0.000586349	0.00149185	0.00380014	0.00421207	0.00928139	0.00270166	0.000237509	0.000794169	0.109603	0.00144361	0.00031173	0.025688	0.00104652	0.00419351	6.68e-05	0.639803	0.00925541	0.00269424	0.0361533	0.00115043	0.00158834	0.00728112	0.00855402	0.00236395	0.0460507
8	3	F	Serum	Free flow	clot activator	0.5h,RT	stored immediately	2 M	-20C	sample	none	39	39-A		0.00152493	0.0132129	0.00100073	0.000702102	0.0139531	0.00773901	0.00360582	0.00311339	0.0255394	0.00335484	0.00178226	0.00492107	0.00465103	0.00617278	0.0175653	0.00323094	0.000333578	0.00146774	0.110341	0.00253202	0	0.0319409	0.00416178	0.00588368	0.000368524	0.582043	0.0119135	0.00348192	0.0426853	0.000962611	0.00158211	0.00877151	0.00877787	0.00246212	0.040706
8	3	F	Serum	Free flow	clot activator	0.5h,RT	stored immediately	2 M	-20C	sample	none	39	39-B		0.00207492	0.01529	0.00306605	0.00146252	0.016551	0.0109709	0.00304188	0.00248991	0.025169	0.00229249	0.00105559	0.00190974	0.00578158	0.00761074	0.0180297	0.00283237	0.000189362	0.000560028	0.120366	0.00315872	0.000100724	0.0289764	0.00345283	0.00683717	0.000120869	0.603581	0.00752613	0.00391617	0.0317362	0	0.000503622	0.00634564	0.00634967	0.0015995	0.0347942
8	3	F	Serum	Free flow	clot activator	0.5h,RT	stored immediately	2 M	-20C	sample	none	39	39-C		0.00204658	0.0184088	0.00290448	0.00114215	0.0160212	0.00802092	0.00266158	0.00331276	0.0216337	0.00384508	0.00187086	0.00416034	0.00683225	0.00575212	0.0188068	0.00211893	0.00160728	0.000186052	0.120882	0.00143674	0.000382441	0.0326677	0.00321457	0.00536968	0.000718369	0.612438	0.00891501	0.00407765	0.0376497	5.17e-06	0.00180884	0.00475984	0.0055764	0.00270293	0.0221764
9	3	F	Serum	Free flow	clot activator	0.5h,RT	24h,4C	until analysis	-80C	sample	none	37	37-A		0.00286994	0.0167239	0.00375762	0.000933116	0.0207525	0.00867067	0.0128705	0.00429396	0.0244428	0.00679876	0.00279204	0.00601495	0.00878021	0.018272	0.0201001	0.0042404	0.0010029	0.00182242	0.174489	0.00342981	0	0.0395211	0.00167555	0.00702433	0.000286426	0.520922	0.00839236	0.00307685	0.0317592	0.000488466	0.00099316	0.00534554	0.00464124	0.00175507	0.0203062
9	3	F	Serum	Free flow	clot activator	0.5h,RT	24h,4C	until analysis	-80C	sample	none	37	37-B		0.00335158	0.0127255	0.00220753	0.0013213	0.0182685	0.00706571	0.00640507	0.00522879	0.0186794	0.00437478	0.00343215	0.00564371	0.00700529	0.0114244	0.0129713	0.00393569	0.0013495	0.000431033	0.13758	0.00281178	0	0.0295922	0.00420962	0.00690055	0.00192555	0.580581	0.00945855	0.0030978	0.0361745	0.000157105	0.00250563	0.00427004	0.00703752	0.00272316	0.0284119
9	3	F	Serum	Free flow	clot activator	0.5h,RT	24h,4C	until analysis	-80C	sample	none	37	37-C		0.00148047	0.00810281	0.00133658	0	0.00841329	0.00576662	0.00434674	0.00130629	0.0127865	0.00283977	0.00109426	0.00312753	0.00450198	0.00759165	0.00748184	0.00248007	0.000666399	0.00132144	0.109956	0.00200677	0.000408927	0.0278373	0.00163192	0.00618312	0.00077999	0.634647	0.0110448	0.00342287	0.0400445	0.0001666	0.00053009	0.00973851	0.00800815	0.00333199	0.0415364
10	3	F	Serum	Free flow	clot activator	0.5h,RT	48h,4C	until analysis	-80C	sample	none	38	38-A		0.00191085	0.0121293	0.00419255	0.000848567	0.0104259	0.00641559	0.00890891	0.00278037	0.0184569	0.00320989	0.000477712	0.0034236	0.00297732	0.0104845	0.00897805	0.00247237	0.000951234	0.000808758	0.0943544	0.00204494	0.000201142	0.0220774	0.0021057	0.00459484	0.000226285	0.607717	0.00674873	0.00369598	0.0349861	0.00154628	0.000148761	0.00754282	0.00797863	0.00223561	0.0632067
10	3	F	Serum	Free flow	clot activator	0.5h,RT	48h,4C	until analysis	-80C	sample	none	38	38-B		0.00377696	0.0191641	0.00397312	0.00184692	0.0223825	0.0104265	0.00908	0.00402133	0.0287528	0.00434882	0.00208132	0.00522989	0.00567209	0.011547	0.0178724	0.00258004	0.000992449	0.000872757	0.127308	0.00238387	0	0.0303038	0.00286597	0.0046547	0.000214449	0.581419	0.00681582	0.00392824	0.0280429	0.0011271	0.0015161	0.00397811	0.00432888	0.00120357	0.0291118
10	3	F	Serum	Free flow	clot activator	0.5h,RT	48h,4C	until analysis	-80C	sample	none	38	38-C		0.00338175	0.0130444	0.00231135	0.00145986	0.0153316	0.00851365	0.00870959	0.00325718	0.0258191	0.00368171	0.00244077	0.00532662	0.00491056	0.0181896	0.0194197	0.00366478	0.000613215	0.00145744	0.140899	0.00221943	0.000453561	0.0330543	0.00301165	0.00479566	0	0.582047	0.00501215	0.00380387	0.0267057	0.000188682	0.000462028	0.00428041	0.00557215	0.00162798	0.0301649
11	3	H	Plasma	Free flow	citrate	0.5h,RT	stored immediately	until analysis	-80C	reference	none	32	32-A		0.00179305	0.00782399	0.0014388	0.000298406	0.00907083	0.00536781	0.00276243	0.00133061	0.0184636	0.00253208	0.000952804	0.00392814	0.00279734	0.00813373	0.0139622	0.00292123	0.000212025	0.00055842	0.117697	0.00212549	0	0.027216	0.00626652	0.00596201	0.000120409	0.565426	0.00983168	0.00446212	0.0336814	0.000896962	0.00115349	0.00870961	0.011144	0.00342556	0.0706288
11	3	H	Plasma	Free flow	citrate	0.5h,RT	stored immediately	until analysis	-80C	reference	none	32	32-B		0.00181058	0.0110635	0.00154425	0.000617244	0.013145	0.00826192	0.00458932	0.00170999	0.0249995	0.00414925	0.000692685	0.00508998	0.00432642	0.00998906	0.0184339	0.00310794	0.00056695	0.00100016	0.134244	0.00194546	8.69e-05	0.0281052	0.00539059	0.0049208	0	0.550378	0.00828021	0.00164255	0.0292071	0.000625245	0.00145052	0.00738635	0.00991362	0.00261186	0.0617461
11	3	H	Plasma	Free flow	citrate	0.5h,RT	stored immediately	until analysis	-80C	reference	none	32	32-C		0.00106428	0.00961867	0.00112271	0.000613585	0.0110438	0.00697441	0.00358655	0.00199561	0.0228801	0.00279473	0.00114536	0.00372388	0.00401022	0.00752591	0.0158561	0.00375455	0.000485755	0.00127538	0.136592	0.0023959	0	0.0320905	0.00599779	0.00671583	0.000503286	0.603575	0.0078926	0.0034631	0.0302322	0.00141417	0.00111468	0.00628997	0.00737982	0.00204236	0.0356025
12	3	G	Plasma	Vacuum	citrate	0.5h,RT	stored immediately	until analysis	-80C	sample	none	31	31-A		0.0038457	0.0143351	0.00209328	0.000717278	0.0142975	0.0098014	0.00535135	0.00266417	0.0232247	0.00438522	0.00156839	0.00362194	0.00253661	0.0103472	0.013369	0.00246133	0.000556256	0.000445423	0.136983	0.00233168	0	0.027336	0.00677127	0.00615646	0.00014011	0.571766	0.0098014	0.00242369	0.0325995	0.000612718	0.00111251	0.00662488	0.00884573	0.00207237	0.0442558
12	3	G	Plasma	Vacuum	citrate	0.5h,RT	stored immediately	until analysis	-80C	sample	none	31	31-B		0.00142408	0.00640838	0.00107725	0.000372099	0.00603398	0.00519676	0.0031973	0.00147347	0.0117096	0.00236352	0.00149529	0.00280223	0.00181341	0.00763148	0.0102867	0.00279878	0.000467421	0.000447897	0.117424	0.002081	0	0.0243174	0.00601101	0.00584104	0.000213613	0.603921	0.0101133	0.0022682	0.034696	0.000542071	0.00151941	0.0081368	0.0117108	0.00351198	0.0636256
12	3	G	Plasma	Vacuum	citrate	0.5h,RT	stored immediately	until analysis	-80C	sample	none	31	31-C		0.0020847	0.00857291	0.00198247	0.000847512	0.00875515	0.00573552	0.00346857	0.00139869	0.0124682	0.00308927	0.000971971	0.00329818	0.00200914	0.00795653	0.00933744	0.00242845	0.000241511	0.000112606	0.101778	0.00173058	0	0.0240118	0.00770169	0.00554438	0.000530436	0.586838	0.0101094	0.00333819	0.0383781	0.00134387	0.00175281	0.00879367	0.0122341	0.00344635	0.0730742
13	3	I	Plasma	Free flow	EDTA	0.5h,RT	stored immediately	until analysis	-80C	sample	none	44	44-A		0.00204674	0.0215915	0.00434538	0.00177279	0.0238492	0.00842625	0.00794133	0.00444614	0.0218875	0.00582217	0.0015996	0.00487438	0.00764219	0.00972042	0.0135714	0.00382897	0.00220103	0.000875373	0.157936	0.00142642	0.000733676	0.0293376	0.00166258	0.00556712	0.000557342	0.569049	0.010876	0.00231753	0.03635	0.0012123	0.000497514	0.00503497	0.00410292	0.00168777	0.0154607
13	3	I	Plasma	Free flow	EDTA	0.5h,RT	stored immediately	until analysis	-80C	sample	none	44	44-B		0.00647025	0.0141943	0.00575342	0.00161353	0.0180442	0.00896975	0.0103309	0.00339621	0.0190778	0.00439762	0.00170482	0.00469831	0.00647562	0.0125136	0.0140332	0.00406471	0.00048057	0.000367811	0.169577	0.00363784	0.000845697	0.0325043	0.00262569	0.00766497	0.000442984	0.548409	0.0077992	0.00411304	0.0310975	0.00108464	0.00106585	0.00528091	0.00636286	0.0019894	0.0243641
13	3	I	Plasma	Free flow	EDTA	0.5h,RT	stored immediately	until analysis	-80C	sample	none	44	44-C		0.00299539	0.00809202	0.00192087	0.000901854	0.010315	0.00655039	0.005277	0.00269323	0.0129667	0.00327596	0.00156013	0.00178983	0.0037662	0.00894608	0.00831093	0.00304164	0.000332992	0.000317576	0.108998	0.00205962	0	0.0278896	0.00151696	0.00687567	0	0.574268	0.0175006	0.00458018	0.0503866	0.00076619	0.000804731	0.0150509	0.0128927	0.00480526	0.0533897
14	3	J	Plasma	Free flow	Li heparin	0.5h,RT	stored immediately	until analysis	-80C	sample	none	43	43-A		0.00129376	0.00757042	0.000455778	0.00035563	0.00741304	0.0035236	0.00269584	0.000748049	0.0101498	0.00210108	0.0012774	0.00296154	0.00183538	0.00680397	0.00636659	0.00175975	0.000531401	0.000351542	0.108629	0.00124675	0	0.0237168	0.00456596	0.00592307	0.000570234	0.634172	0.00775641	0.0048991	0.0381096	0.000756224	0.000809364	0.00743552	0.00733742	0.00224619	0.0589099
14	3	J	Plasma	Free flow	Li heparin	0.5h,RT	stored immediately	until analysis	-80C	sample	none	43	43-B		0.00298552	0.0086654	0.0024575	0.000453996	0.010923	0.00509758	0.00526537	0.00133731	0.0124726	0.00243776	0.00113006	0.00520862	0.0028054	0.00835451	0.00863086	0.00202324	0.000367638	0.000631646	0.116993	0.00161366	3.95e-05	0.0245429	0.00569715	0.00528017	0.000298552	0.624874	0.0112586	0.00405636	0.0353155	0.000804362	0.00156185	0.00732809	0.00660515	0.00166054	0.0435244
14	3	J	Plasma	Free flow	Li heparin	0.5h,RT	stored immediately	until analysis	-80C	sample	none	43	43-C		0.00212151	0.00930413	0.00185052	0.000333836	0.01137	0.00572261	0.00457067	0.00200301	0.0137841	0.00271293	0.00125292	0.00434193	0.00354546	0.0093948	0.00922994	0.00234303	0.00031632	0.000802648	0.126069	0.00141983	0.000223588	0.0267254	0.00857051	0.00611105	5.05e-05	0.608216	0.010419	0.00215242	0.0361779	0.00109012	0.00052033	0.00736293	0.00653041	0.00192986	0.0461167
15	3	K	Plasma	Free flow	citrate	hemolysis	stored immediately	until analysis	-80C	sample	hemolysis	45	45-A	156	0.00103606	0.00381699	0.000730803	0.000508329	0.00524756	0.00315862	0.0028081	0.0014629	0.00980311	0.00221181	0.00108521	0.00377172	0.00187551	0.00671434	0.00690447	0.00187939	0.00017591	0.000495394	0.120211	0.00190656	0	0.025613	0.00958064	0.00646987	9.7e-05	0.63223	0.00708556	0.0040925	0.0360693	0.00125595	0.00147066	0.00895202	0.0102351	0.00299435	0.050428
15	3	K	Plasma	Free flow	citrate	hemolysis	stored immediately	until analysis	-80C	sample	hemolysis	45	45-B	156	0.00363635	0.00674473	0.00400387	0.00170559	0.007516	0.00601487	0.010143	0.00145454	0.0169938	0.00497702	0.00152701	0.00838303	0.00353283	0.0145972	0.0113749	0.00301261	0.000496925	0.000970557	0.149745	0.00071433	0	0.0260989	0.00627368	0.00568358	0.000160465	0.576084	0.00530571	0.00399352	0.0302788	0.000313166	0.000716918	0.00583628	0.00959946	0.00338789	0.0403131
15	3	K	Plasma	Free flow	citrate	hemolysis	stored immediately	until analysis	-80C	sample	hemolysis	45	45-C	156	0.00450713	0.00851432	0.00481379	0.00156938	0.011331	0.00610227	0.014346	0.00283467	0.0205746	0.00602497	0.0013323	0.009826	0.00371084	0.0172322	0.0141012	0.00318514	0.000968942	0.00132456	0.176311	0.00245843	0.000121118	0.0258058	0.00822312	0.00618731	6.44e-05	0.570099	0.00532145	0.00346861	0.0232572	0.000891633	0.00101275	0.00410512	0.00641667	0.00125499	0.019469
1	4	F	Serum	Free flow	clot activator	0.5h,RT	stored immediately	until analysis	-80C	reference	none	48	48-A		0.00206953	0.016248	0.00186407	0.00126911	0.0266106	0.0116638	0.00493519	0.00376238	0.0227391	0.00243335	0.00300905	0.00551945	0.0102834	0.00987465	0.0121325	0.00396998	0.00133117	0.00120704	0.125453	0.00415403	0.000819677	0.035321	0.00428458	0.005192	0.000265379	0.580449	0.0182191	0.00292772	0.035244	0.000224716	0.00131191	0.00500153	0.0037046	0.00103369	0.0217161
1	4	F	Serum	Free flow	clot activator	0.5h,RT	stored immediately	until analysis	-80C	reference	none	48	48-B		0.00129466	0.00974608	0.00136829	0.000340335	0.0140037	0.0058107	0.00312691	0.00303245	0.0138843	0.00309219	0.00145024	0.00264072	0.00549815	0.00564262	0.00731512	0.00240596	0.000318109	0.000145858	0.0903694	0.00510641	9.31e-05	0.0308427	0.00331445	0.00479108	0.000398678	0.586297	0.0234498	0.00315886	0.0522907	0.0012391	0.00179336	0.0104212	0.00955716	0.00334223	0.054455
1	4	F	Serum	Free flow	clot activator	0.5h,RT	stored immediately	until analysis	-80C	reference	none	48	48-C		0.00233653	0.0121655	0.000579459	9.97e-05	0.0184274	0.00803454	0.00438021	0.0026948	0.0184617	0.00297206	0.00149849	0.00402506	0.00752674	0.00864827	0.00899408	0.00351414	0.00150472	0.000395652	0.101829	0.00453287	0	0.0351071	0.00427429	0.00748935	8.1e-05	0.57625	0.0266489	0.00354841	0.0494846	0.00144553	0.00103119	0.00951435	0.00672609	0.00198761	0.0375838
2	4	A	Serum	Free flow	clot activator	6h,RT	stored immediately	until analysis	-80C	sample	none	49	49-A		0.00104896	0.0120623	0.00192898	7.37e-05	0.0152583	0.00902135	0.00481784	0.00307469	0.0189258	0.00340028	0.00133001	0.00400079	0.00675603	0.00742564	0.0109211	0.00267077	0.00106739	0.000668078	0.112454	0.00327588	0	0.0325438	0.00255559	0.00459668	0.00050221	0.609168	0.0153212	0.0024189	0.0389912	0.000942988	0.00151277	0.00599427	0.00667617	0.00216242	0.0341365
2	4	A	Serum	Free flow	clot activator	6h,RT	stored immediately	until analysis	-80C	sample	none	49	49-B		0.00164208	0.0123148	0.00134198	0.000306254	0.017675	0.00838121	0.00392436	0.00386588	0.0177843	0.00257777	0.00140046	0.00321644	0.00618203	0.00745937	0.00918301	0.0030133	0.000333956	0.000711002	0.0962592	0.00355501	0.000353962	0.0322336	0.00472462	0.00491853	0.00014928	0.585864	0.016153	0.00356425	0.0450671	0.000988016	0.0012835	0.00845969	0.00875518	0.00271166	0.0517724
3	4	B	Serum	Free flow	clot activator	2h,RT	stored immediately	until analysis	-80C	sample	none	50	50-A		0.00040479	0.0056004	0.000438724	0.000350252	0.00670448	0.00384671	0.00118649	0.00214878	0.0100688	0.000767161	0.000787764	0.00171733	0.00266992	0.00477022	0.00556404	0.00158159	0.000112711	0.00039873	0.0708903	0.0016337	0	0.0239674	0.00520773	0.00431452	0	0.627173	0.0161625	0.00385641	0.0446493	0.000990159	0.00137192	0.00920836	0.0104312	0.00272688	0.0766798
3	4	B	Serum	Free flow	clot activator	2h,RT	stored immediately	until analysis	-80C	sample	none	50	50-B		0.00122696	0.00607946	0.000623102	0.000572581	0.00724627	0.00428233	0.0019487	0.00113313	0.00813161	0.00203531	0.000416204	0.000940668	0.0020714	0.0042703	0.00513639	0.00121493	0.000618291	0.000702494	0.064461	0.00129913	0.000550928	0.020584	0.00361111	0.00322618	0	0.630435	0.0130539	0.00188374	0.0427342	0	0.00168406	0.00761677	0.00937541	0.00208823	0.087778
3	4	B	Serum	Free flow	clot activator	2h,RT	stored immediately	until analysis	-80C	sample	none	50	50-C		0.00113409	0.0100919	0.00119975	9.71e-05	0.0153519	0.00636675	0.00327914	0.00365124	0.0150386	0.00188513	0.000748305	0.00269089	0.00639001	0.00556236	0.00885107	0.0026307	0.000604664	0.000830386	0.0897036	0.00261018	0.000121754	0.0290622	0.00287831	0.00485646	0.000350212	0.610424	0.0183301	0.00176474	0.0401007	0.000612872	0.00151439	0.00834764	0.00755282	0.00260881	0.0552474
4	4	C	Serum	Free flow	clot activator	2h,4C	stored immediately	until analysis	-80C	sample	none	51	51-A		0.00444282	0.026524	0.00408726	0.00109658	0.0278565	0.0127037	0.00944722	0.0033994	0.0239321	0.0041803	0.00186751	0.00315018	0.0064798	0.00966654	0.00912489	0.00288434	0.00103012	0.000897204	0.0977188	0.00244571	0	0.0234635	0.00204031	0.00346919	0.000269161	0.608012	0.0188812	0.000731055	0.035928	0.000235931	0.00157177	0.00464552	0.00501769	0.000970309	0.0265074
4	4	C	Serum	Free flow	clot activator	2h,4C	stored immediately	until analysis	-80C	sample	none	51	51-B		0.00257645	0.0240394	0.0045704	0.00292371	0.0254397	0.0107091	0.00765095	0.00675479	0.0225384	0.0056682	0.00334939	0.00348381	0.00606027	0.00805422	0.0125686	0.00155707	0.00199395	0	0.0958777	0.0045592	0.00068332	0.024734	0.00434636	0.00153467	0.000212837	0.549446	0.0211493	0.00526493	0.0364624	0.00321497	0.000291251	0.0096897	0.00609387	0.00294612	0.0461521
4	4	C	Serum	Free flow	clot activator	2h,4C	stored immediately	until analysis	-80C	sample	none	51	51-C		0.00511871	0.0250807	0.00525547	0.000805904	0.0314791	0.0140716	0.0130654	0.0061151	0.0264727	0.00463028	0.00123084	0.00485496	0.00868423	0.0124305	0.0127675	0.00429327	0.00165577	0.00204651	0.121565	0.00356552	0.000346783	0.0294375	0.00139202	0.00314058	0	0.568827	0.0148286	0.00184625	0.0299992	8.79e-05	0.00106477	0.00489892	0.0041907	0.00154831	0.0194052
5	4	D	Serum	Free flow	clot activator	0.5h,RT	6h,RT	until analysis	-80C	sample	none	56	56-A		0.00242259	0.0187976	0.00317688	5.88e-05	0.0247364	0.0102375	0.0054833	0.00471831	0.0221136	0.0033985	0.00138095	0.00448676	0.00804574	0.00753983	0.011429	0.00350626	0.000824597	0.000967507	0.100173	0.00365069	0.000525786	0.0311115	0.00306301	0.00489485	0.000210161	0.570478	0.0204399	0.00400988	0.038283	0.000790207	0.00154297	0.00862273	0.00707289	0.00216504	0.0425695
5	4	D	Serum	Free flow	clot activator	0.5h,RT	6h,RT	until analysis	-80C	sample	none	56	56-B		0.00207624	0.0239185	0.00261245	0.000863429	0.0304142	0.0139816	0.00359938	0.00586879	0.0288067	0.0037081	0.00220291	0.00416726	0.0114484	0.00920956	0.0155702	0.0050803	0.000831763	0.000832819	0.106911	0.00546557	0.000136164	0.0354418	0.00350122	0.00540541	8.23e-05	0.541708	0.0231268	0.00348116	0.0381756	0.00126242	0.00148409	0.00720932	0.00597223	0.0023834	0.0315194
5	4	D	Serum	Free flow	clot activator	0.5h,RT	6h,RT	until analysis	-80C	sample	none	56	56-C		0.00312485	0.0338091	0.00251049	0.00129237	0.0404475	0.0136664	0.00388098	0.00810628	0.0287602	0.00390316	0.00179196	0.00390509	0.0114211	0.00679461	0.0145084	0.00340743	0.000723344	0.00103486	0.100416	0.00344987	0.0001167	0.0336953	0.00245744	0.00451077	0	0.533202	0.0200665	0.00303419	0.0378646	0.000260404	0.0014544	0.00680329	0.00610117	0.00174471	0.0370343
6	4	E	Serum	Free flow	gel	0.5h,RT	6h,RT	until analysis	-80C	sample	none	57	57-A		0.0014142	0.0228635	0.00145439	0.000620027	0.0291643	0.0134311	0.00308961	0.00620602	0.0291729	0.00324749	0.00192993	0.00276142	0.00996063	0.00661363	0.0161638	0.00434306	0.000567402	0.000828617	0.109434	0.00469039	1.63e-05	0.0354143	0.00278343	0.00504825	9.09e-05	0.556315	0.0217172	0.00353358	0.0397162	0.00152806	0.00141803	0.0066385	0.00559364	0.00201413	0.0308502
6	4	E	Serum	Free flow	gel	0.5h,RT	6h,RT	until analysis	-80C	sample	none	57	57-B		0.00226348	0.0172151	0.00122058	0.00116135	0.0197874	0.0107822	0.00330848	0.00320271	0.0206442	0.00325772	0.00137289	0.00294252	0.00500715	0.00713101	0.0113195	0.00280502	0.000617697	0.000825006	0.102815	0.00350522	0.000194617	0.0300979	0.00304406	0.00363214	0.000186155	0.630201	0.0175747	0.0032281	0.0356254	0.000215771	0.000674812	0.00407637	0.00413561	0.00130732	0.0271765
6	4	E	Serum	Free flow	gel	0.5h,RT	6h,RT	until analysis	-80C	sample	none	57	57-C		0.00166012	0.0171082	0.00100043	0.00102224	0.018722	0.00867678	0.00310489	0.00290862	0.0196597	0.00163286	0.000485224	0.00242884	0.00637606	0.0038409	0.00895756	0.00229527	0	0.00103587	0.0910503	0.00262784	0.00022353	0.0281839	0.00303401	0.00326027	0.000117217	0.6211	0.0195562	0.00302856	0.0406034	0.000179914	0.000744192	0.00631609	0.00543832	0.00142023	0.0439209
7	4	F	Serum	Free flow	clot activator	0.5h,RT	stored immediately	2 M	-80C	sample	none	55	55-A		0.00460038	0.0207369	0.00373466	0.000851624	0.0310068	0.0106403	0.0113167	0.00597748	0.0226596	0.00514397	0.00164486	0.00367829	0.00912023	0.014695	0.0111516	0.0042239	0.000591909	0.000545603	0.125483	0.00377493	0.000533523	0.033469	0.00197504	0.0044071	0	0.565424	0.0194947	0.00365816	0.0363863	0.000831491	0.000728813	0.00555267	0.00505941	0.00155225	0.0185606
7	4	F	Serum	Free flow	clot activator	0.5h,RT	stored immediately	2 M	-80C	sample	none	55	55-B		0.00525805	0.0298029	0.00553555	0.00264363	0.0385006	0.0146933	0.0100231	0.00796375	0.0289448	0.00513755	0.00259251	0.00330454	0.0118452	0.0143172	0.0137111	0.00492577	0.00116115	0.000715678	0.139492	0.00524709	0.00100414	0.0364302	0.0010297	0.00401656	0.000649953	0.53008	0.018604	0.00236247	0.0317235	0.00107352	0	0.00340312	0.002954	0.000799661	0.0115677
7	4	F	Serum	Free flow	clot activator	0.5h,RT	stored immediately	2 M	-80C	sample	none	55	55-C		0.00166811	0.0223491	0.00305474	0.00117331	0.0252231	0.0132975	0.0146426	0.00531839	0.0250276	0.00480581	0.00233476	0.00384287	0.00892423	0.0180381	0.0120353	0.00644133	0.000420731	0.000580727	0.129511	0.00377473	0.000272586	0.0373295	0.00277919	0.00566801	0.000159996	0.532716	0.0223284	0.0041599	0.0387546	0.000488877	0.00195847	0.00657466	0.00501321	0.00171848	0.023632
8	4	F	Serum	Free flow	clot activator	0.5h,RT	stored immediately	2 M	-20C	sample	none	54	54-A		0.00268878	0.030877	0.00727478	0.00219249	0.0354065	0.0115844	0.00795954	0.00655861	0.0268627	0.00567911	0.00185953	0.00415881	0.00713658	0.0126209	0.0150459	0.00452946	0	0.000106797	0.116315	0.00468024	8.8e-05	0.0341689	0.000213595	0.00581103	0	0.533578	0.0197638	0.00417138	0.0380701	0.00181555	0.00191607	0.00841814	0.00526448	0.000904636	0.0235017
8	4	F	Serum	Free flow	clot activator	0.5h,RT	stored immediately	2 M	-20C	sample	none	54	54-B		0.00344811	0.0260442	0.00567959	0.000977969	0.0288811	0.0126302	0.0102551	0.00550301	0.0215619	0.0056369	0.00166099	0.00308138	0.0103211	0.0123954	0.0119103	0.0045949	0.000972147	0.00143397	0.122446	0.00518479	0.000285241	0.0358744	0.00163577	0.00557869	0.000347334	0.530074	0.0211835	0.0032987	0.0384163	0.000118365	0.000754821	0.00803331	0.00762389	0.00228969	0.0310971
8	4	F	Serum	Free flow	clot activator	0.5h,RT	stored immediately	2 M	-20C	sample	none	54	54-C		0.000804159	0.0361915	0.00301889	0.000443825	0.0368858	0.0109462	0.0043284	0.00960157	0.0302768	0.00344074	0.00151604	0.00569942	0.0156701	0.00607733	0.0150593	0.0051721	0.000790976	0.000773399	0.110693	0.00716712	0.000443825	0.0391972	0.000751427	0.00556759	0	0.543875	0.0226131	0.00228065	0.0426556	0.000162589	0.00163029	0.0053303	0.00382744	0.00134466	0.0139563
9	4	F	Serum	Free flow	clot activator	0.5h,RT	24h,4C	until analysis	-80C	sample	none	52	52-A		0.00418045	0.0303446	0.00607462	3.16e-06	0.0389079	0.0137999	0.00738377	0.00811108	0.024602	0.00358279	0.00281437	0.00327605	0.0156024	0.0122314	0.0111626	0.00628965	0.00200484	0.000806365	0.113321	0.00630546	0.000683039	0.0356287	0.00100875	0.00341203	0.000964476	0.531717	0.028656	0.00292505	0.0421144	0.000894907	0.000477495	0.00633708	0.0033646	0.000790554	0.0167882
9	4	F	Serum	Free flow	clot activator	0.5h,RT	24h,4C	until analysis	-80C	sample	none	52	52-B		0.00383232	0.0301179	0.00458308	0.00141418	0.0430633	0.00974887	0.0161331	0.00800519	0.020725	0.00567993	0.00316448	0.00605918	0.0138819	0.0243053	0.0104499	0.00556051	0.00123063	0.00153691	0.160692	0.00575954	3.1e-05	0.0394853	0.00196039	0.00466601	0.000676682	0.493486	0.0182218	0.00302959	0.0332625	0.000718698	0.00152143	0.00404572	0.00265034	0.000781723	0.0129399
9	4	F	Serum	Free flow	clot activator	0.5h,RT	24h,4C	until analysis	-80C	sample	none	52	52-C		0.00330187	0.0251813	0.00248802	0.00158297	0.0346791	0.00970344	0.0108993	0.0062708	0.0183289	0.00468439	0.00152963	0.00370192	0.0085446	0.0124573	0.00866591	0.00307389	0.000728683	0.000979033	0.119253	0.00382752	0	0.0326144	0.00118293	0.00444694	0.000146253	0.548979	0.0231028	0.00254222	0.0418335	0.000708896	0.00117088	0.00627596	0.0051567	0.00155372	0.0325292
10	4	F	Serum	Free flow	clot activator	0.5h,RT	48h,4C	until analysis	-80C	sample	none	53	53-A		0.00192716	0.0227272	0.00177939	0.000989899	0.0293387	0.00663981	0.00322679	0.00649001	0.0128565	0.00328549	0.00298184	0.00284419	0.0113869	0.0068888	0.00890301	0.00474503	0	0.0011235	0.0902468	0.00864188	0.000388672	0.0370716	0.00150813	0.00584425	0.000973704	0.545999	0.0308265	0.00287455	0.0431001	0.000868439	0.00178344	0.00941517	0.00694953	0.00192312	0.0469908
10	4	F	Serum	Free flow	clot activator	0.5h,RT	48h,4C	until analysis	-80C	sample	none	53	53-B		0.00100657	0.0239233	0.00168192	0.000445215	0.0320748	0.00711699	0.0045812	0.00646314	0.0144146	0.00413383	0.00235727	0.00466508	0.0116337	0.00859673	0.00938608	0.00444139	0.00113992	0.0016303	0.120481	0.00672769	0.000733422	0.0418481	0.00179161	0.00522429	0.000402199	0.522601	0.0284959	0.00339611	0.0434482	0.00119369	0.00099797	0.0087645	0.0059405	0.00305198	0.0372798
10	4	F	Serum	Free flow	clot activator	0.5h,RT	48h,4C	until analysis	-80C	sample	none	53	53-C		0.000790226	0.012854	0.000599449	0.000615347	0.0186362	0.00347699	0.0029243	0.00348073	0.00894591	0.00246419	0.00130083	0.00325722	0.00778442	0.00652848	0.0057607	0.00379589	0.000687356	0.00161879	0.104666	0.00486293	0	0.0382871	0.00238564	0.0058645	0.000111286	0.595431	0.0230129	0.00386603	0.0453861	0.000599449	0.00138593	0.00834459	0.00800699	0.00244923	0.0431052
11	4	H	Plasma	Free flow	citrate	0.5h,RT	stored immediately	until analysis	-80C	reference	none	47	47-A		0.00428272	0.0170338	0.00311754	0.00160906	0.0184001	0.0116344	0.00556927	0.00260084	0.0233452	0.00340884	0.00109582	0.00362731	0.00349207	0.00917578	0.00929715	0.00342271	0.00161946	0.00142873	0.11649	0.00308633	0.000405732	0.028644	0.00398449	0.00376602	0.000377989	0.60187	0.0194474	0.00242052	0.0376047	0.000693558	0.000117905	0.00471273	0.00487918	0.00132816	0.0294485
11	4	H	Plasma	Free flow	citrate	0.5h,RT	stored immediately	until analysis	-80C	reference	none	47	47-B		0.00923976	0.0391341	0.00905706	0.00189668	0.0410221	0.0162783	0.0144687	0.00575963	0.0291635	0.00489829	0.00123545	0.00742139	0.00784771	0.00974438	0.0115976	0.00157476	0.000930937	0	0.111364	0.00102664	8.7e-06	0.0184273	0.000957038	0.00283631	0.000287111	0.524204	0.0120674	0.00138335	0.025144	0.000591623	0.000991839	0.00545511	0.0025318	0.00282761	0.0416833
11	4	H	Plasma	Free flow	citrate	0.5h,RT	stored immediately	until analysis	-80C	reference	none	47	47-C		0.0032767	0.0151214	0.00264566	0.000654404	0.0185103	0.00880641	0.00433309	0.00297287	0.0154065	0.00343095	0.0015285	0.00275317	0.00263164	0.00837638	0.00857737	0.00250076	0.00125739	0	0.0853203	0.00209409	0.000724519	0.0208475	0.00196789	0.00273448	0.000331877	0.56175	0.0189263	0.00161264	0.0423119	0.000757239	0.000761914	0.00933928	0.00984411	0.00334214	0.076369
12	4	G	Plasma	Vacuum	citrate	0.5h,RT	stored immediately	until analysis	-80C	sample	none	46	46-A		0.0023367	0.0105681	0.0012774	0.000760207	0.0138239	0.00736529	0.00514698	0.00354867	0.0181141	0.00396616	0.000454878	0.00450205	0.0064088	0.00734036	0.0101257	0.00283208	0.000314676	0.000735283	0.110853	0.00299721	0.000230555	0.0256165	0.00731232	0.00440858	0.00041126	0.582574	0.0176219	0.00298163	0.0389544	3.12e-05	0.00259218	0.0079666	0.00748368	0.00257972	0.0516225
12	4	G	Plasma	Vacuum	citrate	0.5h,RT	stored immediately	until analysis	-80C	sample	none	46	46-B		0.0012174	0.0147228	0.00153939	0.0012174	0.0234363	0.00984232	0.00428532	0.00430341	0.0221809	0.00367753	0.00185233	0.00457656	0.00992915	0.00897585	0.0121686	0.00354367	0.000566191	0.00081763	0.140251	0.00384214	0.000101299	0.0325533	0.00363411	0.00574693	0	0.546148	0.0177328	0.00248726	0.0356718	0.00136392	0.00220869	0.00698604	0.00591697	0.00216166	0.0371316
12	4	G	Plasma	Vacuum	citrate	0.5h,RT	stored immediately	until analysis	-80C	sample	none	46	46-C		0.00167522	0.0210884	0.00253135	0.00132312	0.0263142	0.0116042	0.00454754	0.00483663	0.0238533	0.0030947	0.0016641	0.00418804	0.0092804	0.00649702	0.0117339	0.00258695	0.000611528	0.00110075	0.137231	0.00313176	0.000211255	0.0314362	0.00326519	0.00358022	0	0.566927	0.0139354	0.00369511	0.0293014	0.000400273	0.00045216	0.00436964	0.00447342	0.00183088	0.0338193
13	4	I	Plasma	Free flow	EDTA	0.5h,RT	stored immediately	until analysis	-80C	sample	none	59	59-A		0.000820985	0.0121692	0.0031442	0.000232903	0.0259571	0.0106029	0.00411657	0.0050016	0.0159364	0.00472212	0.00263763	0.00355178	0.00862907	0.00592739	0.0074762	0.00519375	0.00175842	0.00105389	0.124021	0.00459984	0.000931614	0.0316108	0.00168273	0.0059565	0	0.587575	0.0245946	0.00183412	0.0450843	0.0016245	7.57e-05	0.00666686	0.00333634	0.00136249	0.0236397
13	4	I	Plasma	Free flow	EDTA	0.5h,RT	stored immediately	until analysis	-80C	sample	none	59	59-B		0.00123493	0.0162929	0.00220642	0.00172891	0.02623	0.00600178	0.00624876	0.00624053	0.0138313	0.00289798	0.00295561	0.00179477	0.0106204	0.00731904	0.00461042	0.00293914	0.000847988	0.00161365	0.122143	0.00119377	0.000889152	0.025522	0.00285681	0.00406705	0.000798591	0.610848	0.0199565	0	0.0427616	0.000279918	0.00231344	0.00554074	0.00412468	0.00074096	0.0235872
13	4	I	Plasma	Free flow	EDTA	0.5h,RT	stored immediately	until analysis	-80C	sample	none	59	59-C		0.00197725	0.00921447	0.000363768	0.000557386	0.0223834	0.00668863	0.0035174	0.00378142	0.0114675	0.0035262	0.00189511	0.00187458	0.0057	0.00365528	0.00568533	0.00209166	9.68e-05	0.000968091	0.0983317	0.00208873	0	0.0242169	0.000947556	0.0024349	0	0.630967	0.0219434	0.00340299	0.0453477	0.00150494	0.00239676	0.0067561	0.00399558	0.00176017	0.0412289
14	4	J	Plasma	Free flow	Li heparin	0.5h,RT	stored immediately	until analysis	-80C	sample	none	58	58-A		0.00171967	0.0165541	0.00257488	0.000235761	0.0180473	0.0100268	0.00444709	0.004632	0.0175526	0.00321744	0.00147004	0.00296319	0.00803436	0.00704971	0.0120931	0.00159023	0.00153938	0.000448408	0.120811	0.00418822	0.000735019	0.0274268	0.00273667	0.00475682	0.000346707	0.60971	0.0197854	0.00255176	0.0378465	0.00118805	0.00106324	0.00563052	0.00487239	0.00138683	0.0248196
14	4	J	Plasma	Free flow	Li heparin	0.5h,RT	stored immediately	until analysis	-80C	sample	none	58	58-B		0.00350287	0.0225274	0.00192379	0.00165131	0.0279705	0.0106761	0.00905429	0.00554157	0.0206824	0.00326979	0.0023834	0.00494079	0.00815477	0.00883762	0.0111882	0.00357181	0.000656584	0.00102099	0.128201	0.00272811	0.000587642	0.0288831	0.00132958	0.00401501	0.000357838	0.581418	0.0157974	0.000597491	0.0330097	0.000807598	0.00140509	0.00362763	0.00391981	0.00207152	0.0272515
14	4	J	Plasma	Free flow	Li heparin	0.5h,RT	stored immediately	until analysis	-80C	sample	none	58	58-C		0.00414623	0.02646	0.00232817	0.00221045	0.0264469	0.0133412	0.00901184	0.00687986	0.0275325	0.00425087	0.00214505	0.00188346	0.0135374	0.0152639	0.00931267	0.00427703	0.00126872	0.00155647	0.113008	0.00432934	0	0.0296514	0.00221045	0.00418547	0.000287751	0.544059	0.0201949	0.000457786	0.042888	0.000837094	0.00136028	0.00783467	0.00309986	0.00194886	0.0289713
15	4	K	Plasma	Free flow	citrate	hemolysis	stored immediately	until analysis	-80C	sample	hemolysis	60	60-A	130	0.00583881	0.0227565	0.00529278	0.00135267	0.0310555	0.0103094	0.0103715	0.00644999	0.0217482	0.00464747	0.00232994	0.0112743	0.00983476	0.0128597	0.0108089	0.00325757	0.000940042	0.00118824	0.146907	0.0031614	0.00017684	0.0304164	0.00788643	0.00472503	0.000645309	0.546608	0.0173148	0.00355851	0.0358519	0.00112309	0.00115101	0.00378809	0.00351197	0.000651514	0.013021
15	4	K	Plasma	Free flow	citrate	hemolysis	stored immediately	until analysis	-80C	sample	hemolysis	60	60-B	130	0.00207194	0.0120277	0.00300548	0.00159841	0.0181198	0.0077234	0.0062023	0.00304606	0.0173371	0.00434296	0.0015211	0.00840567	0.00522624	0.0109743	0.00857768	0.00233673	0.000670675	0.00123311	0.133768	0.00296102	0	0.0302519	0.00697928	0.00508901	0.000471599	0.598652	0.0171457	0.00241404	0.0376351	0.000879416	0.00180135	0.00575582	0.00398346	0.00110555	0.023319
15	4	K	Plasma	Free flow	citrate	hemolysis	stored immediately	until analysis	-80C	sample	hemolysis	60	60-C	130	0.00220948	0.011873	0.00338527	0.00106583	0.0181817	0.00606168	0.00878716	0.00372363	0.014925	0.00402984	0.00162074	0.00694818	0.00602954	0.0131993	0.00857568	0.00301985	0.000607353	0.000741004	0.13578	0.00341742	0	0.0291123	0.00643218	0.00480807	0.000333283	0.590912	0.0159062	0.00217564	0.0359861	0.000187789	0.00100831	0.0051718	0.00450354	0.00157167	0.0280736
1	5	F	Serum	Free flow	clot activator	0.5h,RT	stored immediately	until analysis	-80C	reference	none	63	63-A		0.00212072	0.00966957	0.00210718	0.000252681	0.0149398	0.00225608	0.00574399	0.00482351	0.00651106	0.00228316	0.00158377	0.00188609	0.00498143	0.00780605	0.00609594	0.00247718	0.000261706	0.000369998	0.0857808	0.00162438	4.51e-06	0.0194339	0.0012995	0.00602374	0.000329388	0.55053	0.0169206	0.00262157	0.0360748	0.00104231	0.00117768	0.0106938	0.014845	0.00184548	0.142395
1	5	F	Serum	Free flow	clot activator	0.5h,RT	stored immediately	until analysis	-80C	reference	none	63	63-B		0.00271063	0.0189441	0.00370251	0.000575442	0.0292907	0.00372901	0.0068523	0.00697723	0.0112968	0.00408109	0.0011736	0.00376687	0.010286	0.00818111	0.00848019	0.00259706	0.000242291	0.000526226	0.103337	0.00311571	8.71e-05	0.0259441	0.00229041	0.00618978	5.68e-05	0.555566	0.0189896	0.00312328	0.0355524	0.00154461	0.00049594	0.00813947	0.0120048	0.0012001	0.0837495
1	5	F	Serum	Free flow	clot activator	0.5h,RT	stored immediately	until analysis	-80C	reference	none	63	63-C		0.00635623	0.0218874	0.0031592	0.00255384	0.0314596	0.00626165	0.00965731	0.00516444	0.0102721	0.00842768	0.00246871	0.00367943	0.0125706	0.0196835	0.0139516	0.0041429	0.000160798	3.78e-05	0.104131	0.00229846	0	0.0254155	0.00197686	0.00807771	0.000340512	0.481995	0.023571	0.00329162	0.036397	0.00162689	0	0.00971406	0.00798313	0.000255384	0.102863
2	5	A	Serum	Free flow	clot activator	6h,RT	stored immediately	until analysis	-80C	sample	none	64	64-A		0.0011833	0.0098975	0.0015883	0.00100412	0.0156292	0.00339124	0.00483396	0.00352375	0.00631028	0.0027436	0.000628975	0.00379438	0.00565518	0.00996655	0.00711097	0.00154724	0.000343417	0.000754024	0.110866	0.00107504	0.000485263	0.0237182	0.00567198	0.00592021	0	0.610285	0.0108363	0.00308142	0.0289329	0.000511392	0.00102838	0.00513632	0.0105078	0.00142966	0.0872223
2	5	A	Serum	Free flow	clot activator	6h,RT	stored immediately	until analysis	-80C	sample	none	64	64-B		0.0027535	0.0135039	0.00242097	0.000397413	0.0224619	0.00240475	0.00764817	0.00438371	0.00893368	0.00487844	0.00186946	0.00492305	0.00594903	0.00855249	0.00965956	0.00178836	0.000145988	0.000239259	0.110116	0.00233581	0.000531235	0.0221943	0.00393357	0.00419717	0.000210872	0.610706	0.00686145	0.000450131	0.0248991	0.00121251	0.00133823	0.00401063	0.00932703	0.00115574	0.0815264
2	5	A	Serum	Free flow	clot activator	6h,RT	stored immediately	until analysis	-80C	sample	none	64	64-C		0.00137421	0.00634188	0.00102323	0.000688454	0.00769179	0.00158209	0.00191417	0.00181968	0.00433861	0.00140661	0.000804546	0.00130401	0.0030751	0.0045843	0.00440611	0.000969236	0.000718152	0.000691154	0.07036	0.000286181	0.000483268	0.0187584	0.00216796	0.0045465	0.000242984	0.5977	0.00562373	0.00290231	0.032441	0.00134721	0.000677655	0.00820205	0.0152243	0.00139581	0.163512
3	5	B	Serum	Free flow	clot activator	2h,RT	stored immediately	until analysis	-80C	sample	none	65	65-A		0.00110477	0.00685137	0.00121785	0.000583481	0.0119252	0.00287443	0.00486686	0.00317522	0.00832478	0.00271612	0.00078702	0.00346696	0.00541077	0.00755359	0.00818682	0.00156839	0.000310964	0.000561996	0.103152	0.00173122	9.27e-05	0.0277764	0.00333692	0.00718043	0.000109685	0.58694	0.012313	0.00377001	0.0336191	0.00256121	0.00075762	0.00800364	0.0160423	0.0018149	0.105231
3	5	B	Serum	Free flow	clot activator	2h,RT	stored immediately	until analysis	-80C	sample	none	65	65-B		0.000937029	0.00938858	0.00125471	0.000468515	0.0133584	0.00251398	0.00328874	0.00314248	0.00748938	0.00203175	0.00102388	0.00337102	0.00568845	0.00577073	0.00845612	0.00138269	0.000313105	0.000102845	0.0826688	0.00136441	0.00018512	0.0232955	0.00422806	0.00563817	4.11e-05	0.572801	0.0144554	0.00377326	0.0347844	0.00159295	0.000617068	0.00923774	0.0161215	0.00218031	0.132359
3	5	B	Serum	Free flow	clot activator	2h,RT	stored immediately	until analysis	-80C	sample	none	65	65-C		0.00208298	0.0106261	0.00104865	0.000336427	0.0173904	0.00353606	0.00336427	0.00382596	0.0099747	0.00331058	0.00175729	0.003307	0.00726897	0.00625253	0.00967406	0.00185393	0.000103791	0.00105223	0.0955703	0.00241941	0	0.0260623	0.00415165	0.00672138	0.000386533	0.568236	0.015719	0.00444155	0.0351208	0.00161771	0.00125623	0.00895468	0.0127055	0.0023013	0.108788
4	5	C	Serum	Free flow	clot activator	2h,4C	stored immediately	until analysis	-80C	sample	none	66	66-A		0.00215321	0.00840066	0.00107376	0.000410135	0.012428	0.00109797	0.00418965	0.00336653	0.00373821	0.0022415	0.00080603	0.00334374	0.00437478	0.00825825	0.00458981	0.00133864	0.000300481	0.000941318	0.0939338	0.00205495	2.85e-05	0.0220234	0.00492447	0.00614064	7.83e-05	0.582126	0.0159654	0.004033	0.0311917	0.00188406	0.000521214	0.00816853	0.0148517	0.00136285	0.125247
4	5	C	Serum	Free flow	clot activator	2h,4C	stored immediately	until analysis	-80C	sample	none	66	66-B		0.00075663	0.00940257	0.000991142	0.000209438	0.0146975	0.00149704	0.0022168	0.00334215	0.00353537	0.00147934	0.000557517	0.00182447	0.00476839	0.00394244	0.00452798	0.00132152	0.0008525	0.000699109	0.0785332	0.0017404	0	0.0230086	0.00261355	0.00533476	0.000147491	0.555982	0.0157358	0.00209733	0.0347386	0.00149556	0.00117108	0.00871379	0.0170869	0.00155013	0.158546
4	5	C	Serum	Free flow	clot activator	2h,4C	stored immediately	until analysis	-80C	sample	none	66	66-C		0.0041975	0.0208992	0.00386631	0.00236247	0.0300056	0.00355965	0.00575776	0.00707269	0.00914323	0.00679793	0.00212696	0.00487704	0.013012	0.0122736	0.0112432	0.0039399	0.00121435	0.000262497	0.119846	0.00421957	0.000461209	0.0324049	0.00280406	0.00857653	0	0.482643	0.0235879	0.00406011	0.0312052	0.00242871	0.00190862	0.00636616	0.0154554	0.00254401	0.097899
5	5	D	Serum	Free flow	clot activator	0.5h,RT	6h,RT	until analysis	-80C	sample	none	71	71-A		0.0029325	0.0259038	0.00311578	0.00105605	0.0278064	0.00619665	0.00158844	0.00721779	0.0135977	0.00409328	0.000916406	0.00296741	0.00689487	0.00727888	0.0153083	0.00169317	8.73e-06	0.000410201	0.0989806	0.001859	0	0.0247168	0.00254848	0.00582136	0	0.54822	0.0156575	0.00466058	0.0291504	0.00131788	0.000392746	0.00626647	0.0123409	0.00178917	0.100255
5	5	D	Serum	Free flow	clot activator	0.5h,RT	6h,RT	until analysis	-80C	sample	none	71	71-B		0.00250321	0.00785075	7.02e-05	0.00147985	0.00876374	0.00374729	0.00276908	0.00238282	0.00688258	0.00210691	0.00128923	0.00164038	0.00440946	0.00404326	0.00583414	0.00126916	0.00086283	0.000356168	0.074991	0.00122401	0.000295971	0.0183101	0.00178084	0.00416366	0	0.601764	0.0116031	0.00299984	0.0264166	0.00184104	0.000993258	0.00595453	0.0127318	0.00136949	0.149892
5	5	D	Serum	Free flow	clot activator	0.5h,RT	6h,RT	until analysis	-80C	sample	none	71	71-C		0.00220587	0.0128686	0.000919632	9.94e-05	0.0154163	0.00223694	0.00297637	0.0052071	0.0084631	0.00239229	0.00165285	0.00184548	0.00488399	0.004797	0.00924603	0.00107497	0.000341755	0.00100662	0.0843389	0.000229908	0.000472243	0.022096	0.00192004	0.00577255	0.000354182	0.602756	0.0103956	0.0018082	0.0298383	0.00262219	0.00173984	0.00530652	0.00958778	0.00243578	0.116458
6	5	E	Serum	Free flow	gel	0.5h,RT	6h,RT	until analysis	-80C	sample	none	72	72-A		0.00264274	0.013008	0.00247816	0.000705105	0.0208651	0.00345071	0.00708098	0.00452427	0.00979292	0.00365645	0.000729419	0.00651053	0.0082574	0.00993506	0.00960963	0.00159911	0.000647126	0.000478798	0.10977	0.0016627	0.000201993	0.0271942	0.00605418	0.00711464	0.000759344	0.557733	0.0117717	0.00333849	0.0330483	0.00148128	0.000172068	0.00724369	0.0130473	0.00148876	0.0963058
6	5	E	Serum	Free flow	gel	0.5h,RT	6h,RT	until analysis	-80C	sample	none	72	72-B		0.00170049	0.00848655	0.00158935	0.000411009	0.0159129	0.00343096	0.00528844	0.00378728	0.00760985	0.00328808	0.00129477	0.00418771	0.00659555	0.00806143	0.00809671	0.00282767	0.000218735	0.000714415	0.108166	0.00138473	0	0.028746	0.00594993	0.00869117	0.000781447	0.574245	0.0172553	0.00260188	0.0337433	0.0015382	0.000603284	0.008543	0.0149798	0.0015576	0.0922213
6	5	E	Serum	Free flow	gel	0.5h,RT	6h,RT	until analysis	-80C	sample	none	72	72-C		0.001965	0.0110404	0.00167472	0.000239245	0.0169003	0.00239245	0.00404484	0.00338771	0.00688707	0.00275929	0.000551859	0.00389172	0.00746764	0.00645005	0.00769731	0.00185654	0.000637987	0	0.0980299	0.00309743	0.000752825	0.0255291	0.00395871	0.00719968	0.0012377	0.554982	0.0158125	0.00297302	0.0366396	0.00341004	0.00196181	0.00942307	0.0152607	0.00236055	0.11598
7	5	F	Serum	Free flow	clot activator	0.5h,RT	stored immediately	2 M	-80C	sample	none	70	70-A		0.00233	0.0241086	0.0048166	0.000981219	0.0293215	0.00587453	0.0083899	0.0082237	0.014258	0.00584896	0.00198801	0.00444266	0.0116404	0.0119121	0.0136955	0.00320574	0.000811823	0.000562523	0.126683	0.00235876	0.000127846	0.0327798	0.00328245	0.00798719	0	0.542713	0.013491	0.00145745	0.0283243	0.00230443	0.00139992	0.00600557	0.0116468	0.000987612	0.056655
7	5	F	Serum	Free flow	clot activator	0.5h,RT	stored immediately	2 M	-80C	sample	none	70	70-B		0.00396434	0.0307999	0.00479636	0.00114074	0.0399973	0.00597475	0.00797386	0.00786844	0.0201643	0.00645664	0.00130262	0.00474742	0.0144907	0.0115504	0.0182104	0.00272195	0.00187487	0.0013478	0.129886	0.00240571	0.000417893	0.0321251	0.00294784	0.00646794	0	0.495942	0.0118704	0.00284619	0.0286615	0.00096379	0.000436717	0.00477754	0.0121904	0.00123862	0.0699764
7	5	F	Serum	Free flow	clot activator	0.5h,RT	stored immediately	2 M	-80C	sample	none	70	70-C		0.000743227	0.0076983	0.00204593	0.000957145	0.0124539	0.00307987	0.00481589	0.00292354	0.00680423	0.00288789	0.000416866	0.0015605	0.00501061	0.00545216	0.00739114	0.00196091	0.000392183	0.000145354	0.0864393	0.00267397	0.00035653	0.0192307	0.00166472	0.00538908	0.000219403	0.585301	0.00986216	0.00416591	0.0304284	0.00180185	0.00109701	0.00627766	0.0168529	0.000663694	0.135934
8	5	F	Serum	Free flow	clot activator	0.5h,RT	stored immediately	2 M	-20C	sample	none	69	69-A		0.00311119	0.0235067	0.00324736	0.00145084	0.0324684	0.00609143	0.0031688	0.0071023	0.0163887	0.00492343	0.00107896	0.00585049	0.013618	0.00519578	0.0158702	0.00221554	0.000382351	0.00175463	0.108331	0.00265027	0.000282835	0.0314575	0.00522721	0.00615952	1.57e-05	0.528692	0.0174363	0.00420062	0.0309338	0.00106849	0.00131466	0.00831745	0.0131309	0.00097421	0.0760879
8	5	F	Serum	Free flow	clot activator	0.5h,RT	stored immediately	2 M	-20C	sample	none	69	69-B		0.00282272	0.0192548	0.00221976	0.000232114	0.0293717	0.00486639	0.0037992	0.00844681	0.012857	0.00417538	0.000397528	0.00411669	0.0123074	0.00494109	0.0138628	0.00255859	0.00107519	0.000282805	0.107503	0.00372983	0	0.0294518	0.00411402	0.00742231	0	0.532024	0.0189907	0.00458892	0.035332	0.00140336	0.000325493	0.00909246	0.0121019	0.0015581	0.0885181
8	5	F	Serum	Free flow	clot activator	0.5h,RT	stored immediately	2 M	-20C	sample	none	69	69-C		0.00291542	0.015436	0.00222759	0.000665135	0.0213594	0.00474498	0.00640869	0.00503128	0.012772	0.00381623	0.00108761	0.00442376	0.0078891	0.00821904	0.0107591	0.00181035	0.000689576	0.000216474	0.113829	0.00229393	2.79e-05	0.0277471	0.00592686	0.00602113	0.000532457	0.564951	0.0143222	0.00322617	0.0308912	0.00134249	0.000696559	0.00606477	0.012566	0.000869389	0.0837494
9	5	F	Serum	Free flow	clot activator	0.5h,RT	24h,4C	until analysis	-80C	sample	none	67	67-A		0.00323936	0.0093744	0.00191604	0.00110105	0.013153	0.00234411	0.00881255	0.00363451	0.00678126	0.00229884	0.00122248	0.00712084	0.00456063	0.00994447	0.00640875	0.00160733	0.000166702	0	0.0986133	0.00237498	0.000965223	0.0200207	0.0059992	0.00658163	0.000296358	0.539794	0.0104116	0.00350691	0.0267093	0.00262812	0.00204981	0.00658163	0.0175469	0.00180696	0.138093
9	5	F	Serum	Free flow	clot activator	0.5h,RT	24h,4C	until analysis	-80C	sample	none	67	67-B		0.00346459	0.0124718	0.00191251	0.000180217	0.016694	0.00473714	0.00591039	0.00420752	0.00866882	0.00267384	0.00121739	0.00556099	0.00631128	0.0091212	0.0081061	0.00208537	0.000536974	0.0010482	0.100484	0.00153736	9.19e-05	0.0259108	0.00673792	0.0071241	0.000257453	0.572925	0.00922786	0.00309312	0.0242962	0.00162931	0.000180217	0.0081061	0.0156311	0.00149323	0.10898
9	5	F	Serum	Free flow	clot activator	0.5h,RT	24h,4C	until analysis	-80C	sample	none	67	67-C		0.0028457	0.0161256	0.00330501	0.00173738	0.0163853	0.00615071	0.005961	0.0052321	0.0107637	0.00811774	0.000279578	0.00525207	0.00677976	0.00573135	0.0116025	0	0.000818764	0.000149774	0.0958153	0.00124811	0.000449322	0.0195904	0.00532196	0.00446326	0	0.587383	0.00669988	0.00435343	0.0186718	0.0015876	0.00268594	0.00544178	0.0144881	0.00265599	0.104213
10	5	F	Serum	Free flow	clot activator	0.5h,RT	48h,4C	until analysis	-80C	sample	none	68	68-A		0.000658707	0.00617538	0.00143504	0.000417573	0.0125684	0.00331118	0.00419338	0.00217609	0.00665177	0.00109392	0.000552844	0.0015409	0.0037464	0.00533435	0.00594601	0.0015409	0.00022349	0.00185261	0.0676645	0.00013527	0.00121155	0.0174146	0.00297594	0.00338176	0.000529318	0.642522	0.00297594	0.00265835	0.0294477	0.00208199	0.000546962	0.00589308	0.0105864	0.000147033	0.128965
10	5	F	Serum	Free flow	clot activator	0.5h,RT	48h,4C	until analysis	-80C	sample	none	68	68-B		0.00618069	0.0101958	0.00163428	0.00166118	0.0159797	0.0040958	0.00480197	0.00281124	0.00746525	0.00237408	0.000208489	0.00356449	0.00576371	0.009039	0.00437827	0.00241443	0.00191675	0.000497683	0.090733	0.00115678	0.00133164	0.0179771	0.00075325	0.00500373	0.000699446	0.613993	0.00929457	0.00353759	0.026848	0.00135854	0.00107607	0.00440517	0.00949633	0.00154685	0.107311
10	5	F	Serum	Free flow	clot activator	0.5h,RT	48h,4C	until analysis	-80C	sample	none	68	68-C		0.00373968	0.00739522	0.00352465	0.000444087	0.0143323	0.00397341	0.00662858	0.00476809	0.00766167	0.00188386	0.00110321	0.00545526	0.00557212	0.0076383	0.00621254	0.000827404	0	0.00124344	0.0944877	0	0	0.0181702	0.00279074	0.00336571	0.000182309	0.617183	0.00660054	0.00198203	0.0258505	0.00181375	0.000186984	0.00645095	0.0118127	0.000864801	0.107726
11	5	H	Plasma	Free flow	citrate	0.5h,RT	stored immediately	until analysis	-80C	reference	none	62	62-A		0.000756598	0.00624871	0.000681735	0.000262818	0.010621	0.00122489	0.00110384	0.00150523	0.00291808	0.00160558	0.000581386	0.00136028	0.00383396	0.00383715	0.00331948	0.00101304	0	0.000305825	0.090623	0.00141125	1.11e-05	0.0213201	0.00235581	0.00555104	0.000363167	0.581805	0.0143913	0.0020468	0.0368089	0.00159921	0.000895175	0.00815374	0.0139788	0.00198946	0.148846
11	5	H	Plasma	Free flow	citrate	0.5h,RT	stored immediately	until analysis	-80C	reference	none	62	62-B		0.0023925	0.0137205	0.00240771	0.00105392	0.0189357	0.00139725	0.00406572	0.00456117	0.00461984	0.00271193	4.35e-05	0.00424391	0.0064517	0.00763599	0.00493493	0.00092788	0.000486757	0.000869208	0.106395	0.00142767	0.000236859	0.0191791	0.0085856	0.00424608	0.000425912	0.565439	0.0147135	0.00156892	0.0279689	0.00212521	0.000990897	0.00657556	0.0145049	0.000964821	0.126198
11	5	H	Plasma	Free flow	citrate	0.5h,RT	stored immediately	until analysis	-80C	reference	none	62	62-C		0.00185169	0.0126625	0.00167003	0.000414927	0.0168923	0.00192807	0.00453117	0.00312744	0.00504106	0.00400684	0.00123653	0.00350521	0.00529497	0.00749553	0.00511125	0.0016948	0.000883527	0.000792697	0.117206	0.00214276	0.000136245	0.0238532	0.00379008	0.0047438	0.000348869	0.542731	0.0120948	0.00346186	0.0296353	0.00113537	0.0016948	0.00692784	0.0141344	0.0016948	0.130062
12	5	G	Plasma	Vacuum	citrate	0.5h,RT	stored immediately	until analysis	-80C	sample	none	61	61-A		0.0019696	0.0135754	0.00222163	0.000516755	0.018438	0.00184253	0.00319372	0.0037846	0.00506802	0.00134695	0.000779369	0.00240164	0.00463597	0.00556147	0.00302217	0.0016371	0.00069889	0	0.0961038	0.000809019	0	0.0186752	0.00401756	0.0040218	0	0.55655	0.016083	0.0026812	0.0347179	0.00170911	0.000408745	0.00810713	0.0132641	0.00182135	0.14266
12	5	G	Plasma	Vacuum	citrate	0.5h,RT	stored immediately	until analysis	-80C	sample	none	61	61-B		0.0024171	0.0105959	0.000850745	0.00131144	0.0158662	0.00161242	0.00412473	0.0046837	0.00519354	0.00389131	0.000820032	0.00340298	0.00587536	0.0056573	0.0060105	0.00158171	0	0.000184277	0.0982165	0.00225432	0	0.0240174	0.00213761	0.00457007	0.000420766	0.534618	0.0160689	0.00260752	0.0345734	0.00161242	0.00102888	0.0094964	0.016158	0.00145272	0.142167
12	5	G	Plasma	Vacuum	citrate	0.5h,RT	stored immediately	until analysis	-80C	sample	none	61	61-C		0.00271732	0.0179281	0.00363161	0.000613314	0.0312307	0.00325397	0.00563908	0.00660164	0.00893565	0.00425912	0.00164402	0.00336471	0.010273	0.00596278	0.00839899	0.00249017	0.000678621	0.00141971	0.124693	0.00289337	0.000990956	0.030095	0.003112	0.00657893	0	0.521615	0.0186237	0.00286781	0.0324205	0.00196204	0.00136292	0.00815764	0.0130244	0.00228289	0.0919857
13	5	I	Plasma	Free flow	EDTA	0.5h,RT	stored immediately	until analysis	-80C	sample	none	74	74-A		0.00310397	0.015234	0.0016342	0.000703263	0.0239312	0.00337212	0.00349102	0.0045358	0.005234	0.00199342	0.000812041	0.00218568	0.007149	0.00500127	0.00524918	0.0017278	0.000419934	0.00105236	0.0984442	0.000877814	0.00018467	0.0213028	0.00180875	0.00506957	0.000101189	0.589312	0.0159575	0.00294713	0.03979	0.000958765	0.000149254	0.00758917	0.00842904	0.000857577	0.103063
13	5	I	Plasma	Free flow	EDTA	0.5h,RT	stored immediately	until analysis	-80C	sample	none	74	74-B		0.00479946	0.018618	0.00479946	0.000873265	0.0342494	0.0047296	0.00861039	0.00733542	0.00821917	0.00458289	0.00192468	0.00349306	0.0113559	0.00945571	0.0066962	0.00272459	0.000129243	0.00127147	0.124241	0.00168016	0.000733542	0.0252129	0.00142517	0.00632942	0	0.575775	0.0145556	0.00429646	0.0346477	0.00313327	0.000492521	0.00555396	0.00861738	0.00143565	0.0485919
13	5	I	Plasma	Free flow	EDTA	0.5h,RT	stored immediately	until analysis	-80C	sample	none	74	74-C		0.00190539	0.0151101	0.00196674	0	0.0329983	0.00399142	0.00439023	0.00785332	0.00938036	0.00421639	0.00178609	0.00260414	0.013215	0.00708981	0.00762154	0.00233486	0.000347673	0.000538553	0.108014	0.0015918	0.000194288	0.0275378	0.0025496	0.0060911	0	0.545077	0.0209933	0.00216444	0.0406334	0.00149295	0.000705572	0.0102461	0.00954397	0.0020315	0.0881726
14	5	J	Plasma	Free flow	Li heparin	0.5h,RT	stored immediately	until analysis	-80C	sample	none	73	73-A		0.00202217	0.00839654	0.00191955	0.000745487	0.0128061	0.00230588	0.00669128	0.00258657	0.00542968	0.00341656	0.000615706	0.00226966	0.00370933	0.00806454	0.00510674	0.00187126	0.000196181	0.000371234	0.114636	0.000980904	0	0.0184742	0.000896395	0.00558361	0.000301817	0.602963	0.011964	0.003987	0.0320288	0.00279482	0.000570433	0.00632306	0.0119368	0.00141854	0.102609
14	5	J	Plasma	Free flow	Li heparin	0.5h,RT	stored immediately	until analysis	-80C	sample	none	73	73-B		0.00267732	0.00861902	0.00237088	0.00107415	0.0124802	0.00327729	0.00641911	0.00331923	0.00662232	0.00191606	0.000587074	0.00138704	0.00750293	0.0070836	0.0048353	0.00182896	0.000406436	0	0.0877192	0.00241604	0.000193541	0.0200379	0.000309665	0.00630943	0	0.575065	0.0239475	0.000916094	0.0430854	0.00108383	0.000696747	0.014164	0.0111157	0.00146446	0.116444
14	5	J	Plasma	Free flow	Li heparin	0.5h,RT	stored immediately	until analysis	-80C	sample	none	73	73-C		0.0035822	0.0165101	0.00266914	0.000903231	0.0241107	0.00318527	0.00928915	0.00584458	0.00778622	0.00454934	0.000856534	0.00264333	0.00865136	0.012193	0.00689651	0.00226852	0.00037481	0.000481723	0.124111	0.00230416	0	0.0260057	0.00148572	0.00756257	0.000100769	0.545859	0.0182785	0.0039988	0.0368322	0.00194779	0.00109125	0.00924368	0.012832	0.00104455	0.0814272
15	5	K	Plasma	Free flow	citrate	hemolysis	stored immediately	until analysis	-80C	sample	hemolysis	75	75-A	187	0.00282936	0.0127196	0.00191308	0.000527555	0.018631	0.00329583	0.00705258	0.00266832	0.00772729	0.00299596	0.00109121	0.00304038	0.00526167	0.0089851	0.00655557	0.00142995	0.000996801	0.000360959	0.112694	0.00128002	0.000541438	0.019625	0.00280715	0.00501733	0.000491459	0.578125	0.0146716	0.0021241	0.031595	0.00304871	0.000105511	0.00674993	0.0101318	0.00119949	0.103109
15	5	K	Plasma	Free flow	citrate	hemolysis	stored immediately	until analysis	-80C	sample	hemolysis	75	75-B	187	0.00513512	0.0279276	0.00469257	0.00135383	0.0415811	0.00440453	0.00957631	0.00883262	0.0110087	0.00506442	0.00107887	0.00403006	0.0092097	0.0131298	0.00826699	0.00319734	0.00155546	0.000259244	0.127454	0.00252174	0.000536818	0.0243218	0.00227558	0.00488373	3.67e-05	0.557212	0.014316	7.86e-05	0.036721	0.00127265	0.000887713	0.00521892	0.00755211	0.000688698	0.0486043
15	5	K	Plasma	Free flow	citrate	hemolysis	stored immediately	until analysis	-80C	sample	hemolysis	75	75-C	187	0.00525183	0.0264839	0.00434162	0.0015932	0.0454397	0.00466406	0.0122797	0.00963534	0.00942461	0.00459424	0.0015183	0.00540163	0.015221	0.0184354	0.00736044	0.00280936	0.000991463	0.000699483	0.133964	0.00255546	0	0.0263315	0.0028119	0.00670285	4.82e-05	0.51348	0.0157174	0.00163128	0.0328338	0.00148656	7.62e-06	0.00639309	0.00748992	0.000708369	0.062014
1	6	F	Serum	Free flow	clot activator	0.5h,RT	stored immediately	until analysis	-80C	reference	none	78	78-A		0.00314821	0.0192837	0.00385498	0.00095458	0.0159624	0.00772975	0.00616371	0.00213717	0.0205763	0.00256681	0.00162836	0.00401041	0.0031724	0.00472451	0.0121111	0.00206019	0.000346053	0.000613658	0.101765	0.000990505	3.74e-05	0.0168151	0.0033227	0.00804721	0.000207485	0.566935	0.00704424	0.00560504	0.0338363	0.00108288	0.00153744	0.0106126	0.0102291	0.00151838	0.087355
1	6	F	Serum	Free flow	clot activator	0.5h,RT	stored immediately	until analysis	-80C	reference	none	78	78-B		0.00207202	0.0172062	0.00264318	0.00079778	0.0171079	0.00603696	0.00605649	0.00204696	0.0181256	0.00223084	0.00175364	0.00416651	0.00386988	0.00506562	0.0115879	0.00211034	0.000389493	0.000647067	0.101692	0.000602112	1.84e-05	0.0184643	0.0038006	0.00906189	1.07e-05	0.561943	0.00833081	0.00663871	0.038072	0.00106899	0.00143969	0.0111866	0.0110672	0.00174074	0.0879378
1	6	F	Serum	Free flow	clot activator	0.5h,RT	stored immediately	until analysis	-80C	reference	none	78	78-C		0.00423456	0.0246281	0.00555446	0.000914967	0.0215535	0.00727777	0.00757306	0.00177247	0.0193655	0.00275587	0.00164921	0.00495746	0.00325948	0.00617527	0.0108889	0.00236946	0.000338009	0.000752391	0.0939229	0.000830276	0	0.0179526	0.00471133	0.00935573	0.000164089	0.522534	0.00733638	0.00632348	0.037497	0.00139173	0.00279481	0.0113373	0.0114038	0.00171575	0.101229
2	6	A	Serum	Free flow	clot activator	6h,RT	stored immediately	until analysis	-80C	sample	none	79	79-A		0.00241429	0.0171768	0.00452452	0.00149758	0.0157473	0.00635792	0.00402078	0.00344898	0.0222868	0.00241429	0.00227814	0.00681627	0.00589957	0.00530961	0.0133739	0.00254589	0.000585419	0.000417508	0.117565	0.00142044	0.000158835	0.0189195	0.00455175	0.00908988	0.000136144	0.589004	0.00654852	0.00244152	0.0307912	0.000385741	0.000903088	0.007438	0.00640784	8.62e-05	0.0659708
2	6	A	Serum	Free flow	clot activator	6h,RT	stored immediately	until analysis	-80C	sample	none	79	79-B		0.00841451	0.0178017	0.00833911	0.00229967	0.0213303	0.00848991	0.00378502	0.00324215	0.0200787	0.00251832	0.00066351	0.00548904	0.00431282	0.00263142	0.00721567	0.00199053	0.000942486	0	0.0764167	0.000520252	0	0.0103673	0.00263142	0.00508942	0.000346835	0.637731	0.00396598	0.00342311	0.0256281	0.000557952	0.00103296	0.00665772	0.00650692	0.00152306	0.0779096
2	6	A	Serum	Free flow	clot activator	6h,RT	stored immediately	until analysis	-80C	sample	none	79	79-C		0.00916687	0.0548409	0.00604219	0.0017806	0.0495213	0.012876	0.00747999	0.00732708	0.0299421	0.00378315	0.00191377	0.00679438	0.0101977	0.00200995	0.0143878	0.00104074	0.000414322	0.000483375	0.0948846	8.88e-05	0.000406923	0.0110905	0.00211353	0.00372643	0	0.59358	0.00322332	0.00277694	0.0170439	0	0.000451315	0.00279421	0.00276954	0.000527767	0.0348597
3	6	B	Serum	Free flow	clot activator	2h,RT	stored immediately	until analysis	-80C	sample	none	80	80-A		0.00166845	0.0135214	0.00353621	0.000917267	0.0135163	0.00702897	0.00392968	0.00203383	0.0208289	0.00282079	0.00144105	0.00437171	0.00378405	0.00414942	0.0128928	0.00131586	0.000396035	0.000278502	0.0978103	0.000792069	0.000171189	0.0145715	0.00217691	0.00651541	0.000137973	0.595273	0.00459145	0.00412898	0.0268052	0.00119066	0.000380704	0.00581532	0.00882007	0.00115233	0.101025
3	6	B	Serum	Free flow	clot activator	2h,RT	stored immediately	until analysis	-80C	sample	none	80	80-B		0.0028232	0.00938933	0.00451277	0.0010805	0.0112315	0.00523083	0.00508095	0.00116226	0.0129224	0.00199886	0.00107505	0.00384239	0.00170455	0.00332735	0.00762892	0.00170182	0.000437379	0.00020847	0.0808701	0.000803905	0	0.0129388	0.00343226	0.00592301	0	0.591611	0.00426887	0.00385874	0.0313441	0.000418303	0.00134211	0.0082625	0.0122384	0.00133257	0.123299
3	6	B	Serum	Free flow	clot activator	2h,RT	stored immediately	until analysis	-80C	sample	none	80	80-C		0.00468531	0.0185575	0.00486035	0.00123398	0.0174828	0.00930811	0.00800401	0.00206189	0.0273813	0.00312082	0.00178737	0.00970712	0.00437383	0.00744519	0.0186075	0.00229129	0.000543059	0.000368019	0.12172	0.000742562	0.000217441	0.0221165	0.00722013	0.0078344	0.000104915	0.559609	0.00588124	0.00523055	0.0294225	0.000721905	0.00148621	0.00575784	0.00837692	0.00100349	0.0610026
4	6	C	Serum	Free flow	clot activator	2h,4C	stored immediately	until analysis	-80C	sample	none	81	81-A		0.00679361	0.021312	0.00639963	0.00282375	0.0222447	0.011146	0.0093867	0.00338964	0.0320755	0.00388963	0.00305583	0.0106044	0.00533804	0.00742684	0.0179998	0.00349995	0.00027077	0.000414035	0.107787	0.0015358	0.000355296	0.0187963	0.00414751	0.00838958	7.31e-05	0.509243	0.00685235	0.00460452	0.0275168	0.00103007	0.00112176	0.00939386	0.0107893	0.00138537	0.0865032
4	6	C	Serum	Free flow	clot activator	2h,4C	stored immediately	until analysis	-80C	sample	none	81	81-B		0.0036468	0.0243046	0.00468967	0.00140042	0.0266521	0.0095037	0.0064023	0.00317783	0.0264305	0.00271923	0.00187457	0.0071783	0.00714461	0.0053685	0.0163115	0.00201319	0.000567424	0.000610175	0.118308	0.000388646	0	0.0210607	0.00421552	0.0077794	5.18e-05	0.552712	0.00590872	0.00434248	0.0327098	0.000386055	0.000542809	0.00709409	0.00896737	0.00101048	0.0638909
4	6	C	Serum	Free flow	clot activator	2h,4C	stored immediately	until analysis	-80C	sample	none	81	81-C		0.00626326	0.0229716	0.00505994	0.00193237	0.0263838	0.0108083	0.0106917	0.00496779	0.0338558	0.0039596	0.00292701	0.011437	0.00766715	0.00977568	0.022622	0.00336335	0.00104342	0.00107324	0.125479	0.00112473	0	0.0224648	0.00542039	0.0102229	0	0.517699	0.00708445	0.00403006	0.0274272	0.0006911	0.000582692	0.00739342	0.00876477	0.0010353	0.0553856
5	6	D	Serum	Free flow	clot activator	0.5h,RT	6h,RT	until analysis	-80C	sample	none	86	86-A		0.00341296	0.025257	0.00285174	0.000968117	0.0232769	0.00633661	0.0034989	0.00307447	0.0230279	0.00173103	0.00269214	0.0039549	0.0071574	0.00411625	0.0126785	0.00272371	0.000541935	0.000598058	0.111442	0.000799749	2.98e-05	0.0177436	0.00421622	0.00811675	0.000208706	0.592309	0.0064015	0.00409696	0.0304431	0.000308675	0.000520889	0.00796943	0.00589113	0.00125224	0.0606704
5	6	D	Serum	Free flow	clot activator	0.5h,RT	6h,RT	until analysis	-80C	sample	none	86	86-B		0.0024249	0.0203909	0.00157963	0.000661135	0.0221347	0.00567733	0.00283756	0.00225407	0.0183831	0.00159516	0.00237165	0.00568399	0.00491636	0.00263788	0.0122132	0.00199006	0.000505835	0.00109598	0.119295	0.000685539	0.000177486	0.0174091	0.00307051	0.00868794	0.000301726	0.616786	0.00711053	0.00268891	0.0321915	5.77e-05	0.00115144	0.00577717	0.00574389	0.000845277	0.0532458
5	6	D	Serum	Free flow	clot activator	0.5h,RT	6h,RT	until analysis	-80C	sample	none	86	86-C		0.00289409	0.0256083	0.0026856	0.00106563	0.0249746	0.00662546	0.00447765	0.00291726	0.0195223	0.0020022	0.0020535	0.00381907	0.00512299	0.00336237	0.0132724	0.00169111	0.000585768	0.000794261	0.120074	0.00136017	0.00025648	0.0161202	0.00286927	0.00724764	2.15e-05	0.598251	0.0052868	0.00326971	0.0272498	0.000205184	0.000895199	0.00671978	0.00571537	0.00105405	0.0601736
6	6	E	Serum	Free flow	gel	0.5h,RT	6h,RT	until analysis	-80C	sample	none	87	87-A		0.00276851	0.0312726	0.0027005	0.00116496	0.0265063	0.00900035	0.00340618	0.00352346	0.0277057	0.00269262	0.00275963	0.00654329	0.00714844	0.00409313	0.0182008	0.00232105	0.000696808	0.000487864	0.125951	0.00107724	0	0.0174241	0.00354712	0.00834001	0.000163607	0.541374	0.00666156	0.00448342	0.0297725	0.000614019	0.00085253	0.00795366	0.00774866	0.00129309	0.0656842
6	6	E	Serum	Free flow	gel	0.5h,RT	6h,RT	until analysis	-80C	sample	none	87	87-B		0.00293504	0.0296797	0.00227275	0.000694372	0.029841	0.00869285	0.00378885	0.00399075	0.0262823	0.00236615	0.00227369	0.00526345	0.00801735	0.0040266	0.0163998	0.00208972	0.000502853	0.000985895	0.121991	0.00127836	0	0.0189131	0.00289447	0.00859096	0.000201896	0.563334	0.00641728	0.0040417	0.0294231	0.000491532	0.00101325	0.00696447	0.00633331	0.00123402	0.0574225
6	6	E	Serum	Free flow	gel	0.5h,RT	6h,RT	until analysis	-80C	sample	none	87	87-C		0.00238918	0.0233778	0.00263571	0.000234722	0.0213112	0.00650404	0.00368999	0.00271308	0.0214725	0.0023328	0.00212693	0.00479935	0.00469969	0.00303959	0.0129897	0.00187909	0.000813005	0.000643847	0.110562	0.000803826	3.02e-05	0.0167964	0.00278651	0.00709675	1.84e-05	0.590247	0.00491737	0.0032153	0.0312679	0.000885126	0.000655649	0.0070679	0.00852082	0.000890372	0.0728859
7	6	F	Serum	Free flow	clot activator	0.5h,RT	stored immediately	2 M	-80C	sample	none	85	85-A		0.00730295	0.054071	0.0055248	0.00135474	0.0470872	0.00951793	0.00781641	0.00589054	0.0275166	0.00400339	0.0028098	0.00339593	0.00907082	0.0049837	0.0141809	0.00255386	0.00048028	0.000546635	0.122396	0.000635108	0	0.0164725	0.00108774	0.00609435	3.08e-05	0.547007	0.00633686	0.00482808	0.0255425	0.000707782	0.00121097	0.00446866	0.00531389	0.000378379	0.0379896
7	6	F	Serum	Free flow	clot activator	0.5h,RT	stored immediately	2 M	-80C	sample	none	85	85-B		0.00499596	0.027448	0.00494657	0.00122455	0.0262295	0.00613585	0.0082846	0.0033088	0.0218705	0.00461902	0.00243196	0.00533964	0.00651178	0.00885908	0.0134247	0.00314351	0.000595645	0.00142108	0.11794	0.000663171	0.000120943	0.0203799	0.00143418	0.0117174	0	0.515022	0.010516	0.00809109	0.0359907	0.00143116	0.00157226	0.0124743	0.0112326	0.0022314	0.069115
7	6	F	Serum	Free flow	clot activator	0.5h,RT	stored immediately	2 M	-80C	sample	none	85	85-C		0.00519216	0.0222302	0.0115065	0.00118719	0.0369693	0.00607638	0.00853007	0.00417271	0.0282455	0.00405178	0.00300113	0.00540801	0.00615309	0.00556795	0.0118537	0.00343153	0.00053573	0.000691768	0.121895	0.00094533	0	0.02074	0.00144075	0.0107809	0	0.540383	0.00815168	0.00775638	0.0362931	0.00134713	0.000932326	0.00992271	0.0101113	0.00175153	0.0444812
8	6	F	Serum	Free flow	clot activator	0.5h,RT	stored immediately	2 M	-20C	sample	none	84	84-A		0.00220516	0.0249107	0.0120549	0.00269055	0.0250958	0.00956585	0.00737336	0.0027197	0.0274936	0.00403139	0.00280461	0.00496035	0.00678532	0.00780425	0.0154767	0.0041011	0.000784481	0.000584242	0.118819	0.00102527	0	0.0216575	0.00171724	0.0112134	0.000726183	0.517385	0.00941123	0.00577905	0.0367058	0.000282616	0.00273744	0.011752	0.0101083	0.00130536	0.0629536
8	6	F	Serum	Free flow	clot activator	0.5h,RT	stored immediately	2 M	-20C	sample	none	84	84-B		0.00539255	0.0395413	0.00542528	0.00164373	0.0340414	0.00998094	0.00924867	0.00453743	0.0261382	0.00464526	0.00262761	0.00629167	0.00770579	0.00894181	0.0148832	0.00314637	0.000529492	0.00136584	0.127963	0.00128859	0	0.0215557	0.00227354	0.00977387	0.000118022	0.493654	0.00785922	0.00668275	0.0364362	0.000833131	0.00250959	0.0103752	0.0102631	0.0015241	0.0575097
8	6	F	Serum	Free flow	clot activator	0.5h,RT	stored immediately	2 M	-20C	sample	none	84	84-C		0.00997059	0.0787374	0.00772688	0.00202304	0.0507375	0.0117173	0.00958304	0.00834251	0.0277738	0.00530516	0.00326914	0.00505298	0.0119584	0.00468768	0.0142652	0.00210093	0.000563708	0.00131656	0.123914	0.00104954	0	0.0131767	0.000925298	0.00453934	0.000521059	0.526848	0.0047841	0.00446887	0.0194016	0.000409801	0.000506225	0.00306702	0.00336556	0.000469139	0.028853
9	6	F	Serum	Free flow	clot activator	0.5h,RT	24h,4C	until analysis	-80C	sample	none	82	82-A		0.0103208	0.0769453	0.0102827	0.00298391	0.0760585	0.0250282	0.00974694	0.0111221	0.0728487	0.00919137	0.00668213	0.00630972	0.0199441	0.00897463	0.0413077	0.00612351	0.0018163	0.00108215	0.144272	0.00226045	4.73e-05	0.0215849	0.00145456	0.00874569	9.31e-05	0.357044	0.00737813	0.0037669	0.0172411	0.000402943	0.000958515	0.00292744	0.00420343	0.000549467	0.0213407
9	6	F	Serum	Free flow	clot activator	0.5h,RT	24h,4C	until analysis	-80C	sample	none	82	82-B		0.0161096	0.0967319	0.0152562	0.00685224	0.0939564	0.0283858	0.0108796	0.0148013	0.0791587	0.0112711	0.00870724	0.00675349	0.0257197	0.00857676	0.0391491	0.0086085	0.00146708	0.00136128	0.132672	0.00490554	0.000296237	0.0202393	0.00134717	0.00690161	0.000126959	0.301763	0.00669354	0.00395688	0.0129604	0	0.000109325	0.00184443	0.00391456	0.00123785	0.0165893
9	6	F	Serum	Free flow	clot activator	0.5h,RT	24h,4C	until analysis	-80C	sample	none	82	82-C		0.00611413	0.0348602	0.0056205	0.00204683	0.0340237	0.0124973	0.0119313	0.00516155	0.0313047	0.00513367	0.00337622	0.00718728	0.00720763	0.0103231	0.0177319	0.0028728	0.000861389	0.000881737	0.1371	0.00144318	0.00013113	0.019919	0.00453529	0.00917609	1.43e-05	0.516401	0.00791679	0.0053801	0.0288554	0.000460462	0.000938258	0.00650827	0.00668462	0.000705389	0.0422472
10	6	F	Serum	Free flow	clot activator	0.5h,RT	48h,4C	until analysis	-80C	sample	none	83	83-A		0.00589658	0.0340162	0.00647433	0.00151199	0.0361606	0.014578	0.0125375	0.00585628	0.0416048	0.00633997	0.00392598	0.00938366	0.0122312	0.0108249	0.0248314	0.00508058	0.00123521	0.00122805	0.14387	0.00186491	0.000280363	0.0252327	0.00493457	0.0110031	5.46e-05	0.46252	0.00840463	0.00519344	0.0289383	0.000387851	0.00164187	0.00769521	0.00672245	0.00107488	0.0408954
10	6	F	Serum	Free flow	clot activator	0.5h,RT	48h,4C	until analysis	-80C	sample	none	83	83-B		0.00389976	0.0188186	0.00390275	0.00144867	0.0197126	0.00833997	0.00819346	0.00317019	0.029786	0.00385416	0.00278971	0.00770085	0.00712825	0.00911663	0.0194502	0.00431463	0.00107118	0.00105249	0.126998	0.00188372	0.000242193	0.0251014	0.00547028	0.0121224	0.000257143	0.511694	0.00941788	0.0048618	0.0350933	0.000861879	0.00124236	0.0115617	0.0100749	0.00173497	0.0624612
10	6	F	Serum	Free flow	clot activator	0.5h,RT	48h,4C	until analysis	-80C	sample	none	83	83-C		0.00250198	0.0180356	0.00361884	0.00119634	0.0194694	0.00831577	0.00872316	0.00266395	0.0252603	0.00439288	0.00231319	0.00612479	0.00389705	0.00789646	0.0157879	0.00218501	0.000937002	0.000740262	0.130948	0.000918123	0	0.0198211	0.00418521	0.00985094	0.000119237	0.557057	0.008124	0.00630464	0.0291136	0.000858505	0.00140103	0.00799582	0.00955981	0.00114964	0.0586486
11	6	H	Plasma	Free flow	citrate	0.5h,RT	stored immediately	until analysis	-80C	reference	none	77	77-A		0.00506755	0.0247922	0.00640129	0.0016947	0.0221354	0.0111518	0.00678212	0.00277676	0.0368422	0.00315097	0.00184372	0.0108645	0.00511225	0.00655362	0.0213531	0.00269149	0.000942973	0.000800575	0.150232	0.00110855	8.28e-07	0.0222505	0.00924097	0.00719772	0.000290591	0.517719	0.00508742	0.00293489	0.0254454	0.00058615	0.000443752	0.00507003	0.00608917	0.000660661	0.0560436
11	6	H	Plasma	Free flow	citrate	0.5h,RT	stored immediately	until analysis	-80C	reference	none	77	77-B		0.00494471	0.0199258	0.00489046	0.00104302	0.0197797	0.00822426	0.00604985	0.00229341	0.0246448	0.00310193	0.0017089	0.0089164	0.00415282	0.00611635	0.0152646	0.00244129	0.000506633	0.000535509	0.127782	0.00089864	0.00028788	0.0182187	0.00801863	0.00687412	9.1e-05	0.546402	0.0059536	0.00528771	0.0282953	0.000560884	0.00127752	0.00692924	0.00793288	0.00100102	0.0715666
11	6	H	Plasma	Free flow	citrate	0.5h,RT	stored immediately	until analysis	-80C	reference	none	77	77-C		0.00470644	0.0168461	0.00616464	0.00104577	0.0159975	0.0070388	0.00517765	0.00115291	0.0188106	0.00221479	0.00167816	0.00654389	0.00226504	0.00530755	0.011184	0.00149423	0.000257887	0.000883643	0.120225	0.000675057	0.000114722	0.0146901	0.00683401	0.00654673	0.000529996	0.535054	0.00559862	0.00501458	0.0283922	0.000404845	0.00115006	0.00756311	0.00885444	0.00115101	0.103974
12	6	G	Plasma	Vacuum	citrate	0.5h,RT	stored immediately	until analysis	-80C	sample	none	76	76-A		0.00618422	0.0359024	0.0059286	0.00184087	0.0359045	0.0158826	0.00564076	0.00352709	0.0445461	0.00495983	0.00239077	0.00542381	0.00710143	0.00501998	0.023476	0.00218026	0.000547751	0.000569231	0.154573	0.000753963	8.81e-05	0.0181016	0.00220604	0.00606607	1.5e-05	0.526051	0.00324784	0.00240581	0.0190467	0.000272801	0.000607896	0.00261417	0.00413498	0.00017614	0.0418503
12	6	G	Plasma	Vacuum	citrate	0.5h,RT	stored immediately	until analysis	-80C	sample	none	76	76-B		0.00494012	0.0289341	0.00536839	0.00178589	0.0279704	0.0124541	0.00851405	0.00260604	0.0358121	0.00518209	0.00200645	0.00546047	0.00476238	0.00719711	0.022617	0.00200003	0.000214136	0.000922926	0.166594	0.00137475	0.000214136	0.0188825	0.00216277	0.00528916	0	0.510344	0.00323559	0.00348185	0.0219083	0.000237691	0.00107282	0.00375595	0.00623778	0.000603863	0.0569366
12	6	G	Plasma	Vacuum	citrate	0.5h,RT	stored immediately	until analysis	-80C	sample	none	76	76-C		0.00718931	0.0488778	0.00613671	0.00156244	0.0451074	0.0160541	0.0100428	0.00540072	0.0452472	0.00448586	0.00206202	0.00583656	0.00721603	0.00658283	0.0249128	0.00182354	0.000674319	0.000602364	0.16174	0.00095597	0.000182971	0.0166812	0.00245263	0.0048662	0	0.498819	0.00281651	0.00252664	0.0179106	0.000516018	0.000509851	0.00217509	0.00401713	0.000427617	0.0342648
13	6	I	Plasma	Free flow	EDTA	0.5h,RT	stored immediately	until analysis	-80C	sample	none	89	89-A		0.00170745	0.00725664	0.00209932	0.00101817	0.00715868	0.00455552	0.00375428	0.00112663	0.0118437	0.000874716	0.00130857	0.00390123	0.00146252	0.00406568	0.00811387	0.00195936	0.000538825	0.000391873	0.095442	0.000675281	7e-05	0.0138765	0.00331692	0.00698024	7.7e-05	0.574542	0.00564017	0.00529028	0.0309055	0.000657787	0.000517832	0.00873666	0.00933497	0.000748757	0.125448
13	6	I	Plasma	Free flow	EDTA	0.5h,RT	stored immediately	until analysis	-80C	sample	none	89	89-B		0.0103495	0.0436836	0.0063791	0.00156638	0.0404893	0.00878783	0.00590587	0.0060857	0.0229988	0.00428271	0.0023614	0.00532854	0.00767575	0.00237087	0.00884935	0.001803	0.00111682	0.000567873	0.0981379	0.000350188	0	0.00888721	0.000724038	0.00314223	0.000397511	0.62183	0.00285356	0.00196389	0.0167049	0.000506353	0.000837612	0.00309017	0.00238507	0.00116414	0.0422166
13	6	I	Plasma	Free flow	EDTA	0.5h,RT	stored immediately	until analysis	-80C	sample	none	89	89-C		0.0085539	0.0336292	0.00588612	0.00203664	0.0326803	0.00926112	0.00604278	0.00424338	0.021848	0.00160246	0.00133389	0.00610993	0.00739905	0.0025514	0.0100086	0.00302587	0.000747515	0.000505803	0.103869	0	6.71e-05	0.00942227	0.00310196	0.00390319	0.000577421	0.596293	0.00200531	0.0026454	0.0201918	0.000487899	0.000541612	0.00467756	0.00435976	5.82e-05	0.0676657
14	6	J	Plasma	Free flow	Li heparin	0.5h,RT	stored immediately	until analysis	-80C	sample	none	88	88-A		0.00289145	0.0237558	0.00207543	0.000579144	0.0225895	0.0070404	0.00381476	0.00307611	0.0219116	0.00522749	0.00202511	0.00448457	0.00517052	0.00430798	0.0150957	0.00249602	0.000598607	0.000807004	0.157394	0.00112031	0.000250646	0.0197944	0.00253257	0.00816499	0.000236405	0.520383	0.00720987	0.00435308	0.0302461	0.000203175	0.00161496	0.00789013	0.0116052	0.00158695	0.0715989
14	6	J	Plasma	Free flow	Li heparin	0.5h,RT	stored immediately	until analysis	-80C	sample	none	88	88-B		0.0055262	0.0430698	0.00487786	0.0012117	0.0396149	0.0107761	0.00850518	0.00477442	0.0309456	0.00740858	0.00231266	0.00812443	0.00880045	0.00664854	0.0206653	0.0025754	0.000972756	0.00101064	0.183571	0.0011335	1.17e-05	0.0209801	0.00294061	0.00725803	4.81e-05	0.45454	0.00548298	0.00420427	0.0242082	0.000439513	0.000832403	0.00599534	0.00803215	0.001066	0.052134
14	6	J	Plasma	Free flow	Li heparin	0.5h,RT	stored immediately	until analysis	-80C	sample	none	88	88-C		0.00563237	0.0318639	0.0043064	0.000992525	0.0305991	0.00805325	0.00628789	0.00373406	0.022602	0.00542405	0.00185494	0.00617342	0.00726762	0.00616773	0.0150016	0.00257161	0.00063206	0.00120369	0.1719	0.00122075	0.000243155	0.0195889	0.00274367	0.0072534	0	0.512315	0.00666542	0.00425734	0.026511	0.000847486	0.00117311	0.00577385	0.00887158	0.00122146	0.0508641
15	6	K	Plasma	Free flow	citrate	hemolysis	stored immediately	until analysis	-80C	sample	hemolysis	90	90-A	596	0.00562439	0.0315668	0.00556031	0.00164155	0.0307989	0.0104921	0.00881798	0.0035994	0.029795	0.00286915	0.00230468	0.0111715	0.00737273	0.00820876	0.0173441	0.00280914	0.000528876	0.00119709	0.13405	0.00151747	7.12e-06	0.0208723	0.00778464	0.00826775	1.42e-05	0.530745	0.00671672	0.0040459	0.0295662	0.000580746	0.0012154	0.00618886	0.00427169	0.0006316	0.0462919
15	6	K	Plasma	Free flow	citrate	hemolysis	stored immediately	until analysis	-80C	sample	hemolysis	90	90-B	596	0.00584239	0.0422678	0.00564889	0.00159418	0.0371434	0.0107385	0.00922528	0.00383008	0.0319873	0.00348458	0.00254249	0.0109595	0.00604678	0.00749207	0.0197153	0.00204759	0.000398934	0.000949868	0.147748	0.000959205	0	0.0208011	0.00705008	0.00744279	0.000164969	0.501928	0.00565822	0.0044111	0.0263675	0.000452367	0.00163309	0.00486554	0.0033995	0.000452886	0.0473061
15	6	K	Plasma	Free flow	citrate	hemolysis	stored immediately	until analysis	-80C	sample	hemolysis	90	90-C	596	0.00286796	0.0154177	0.00243534	0.00107848	0.0125577	0.00525168	0.00465314	0.00144289	0.0162442	0.00183987	0.00150004	0.00523325	0.00293863	0.00557185	0.00977086	0.00176736	0.000353349	0.000779825	0.106642	0.000637257	4.92e-05	0.0174136	0.00570274	0.00831998	1.23e-06	0.565331	0.00729373	0.00390957	0.0365719	0.000583179	0.00175322	0.00936405	0.0071487	0.000820998	0.0956247
16	6	K	Plasma	Free flow	citrate	hemolysis	stored immediately	until analysis	-80C	sample	hemolysis	151	151-A	136	0.00421988	0.0261189	0.00378713	0.000665603	0.0226986	0.00983248	0.004411	0.00282058	0.0279553	0.00294579	0.00151353	0.00760501	0.0048064	0.00478224	0.0151925	0.00269097	0.000292163	0.00125652	0.132807	0.000375638	0	0.0176572	0.00525014	0.00580371	3.08e-05	0.58954	0.00452962	0.00315887	0.02488	0.000465703	0.000749078	0.00473831	0.0032709	0.000485473	0.0474973
16	6	K	Plasma	Free flow	citrate	hemolysis	stored immediately	until analysis	-80C	sample	hemolysis	151	151-B	136	0.00867476	0.0474417	0.00656033	0.00139215	0.0367274	0.013581	0.00821819	0.0046929	0.0332732	0.00404174	0.00284044	0.0112121	0.00632831	0.00610003	0.0177724	0.00297891	0.00223418	0.00114516	0.149387	0.000737242	0.000871967	0.0170314	0.00450579	0.00494738	0.00025448	0.533816	0.00414278	0.00132105	0.0161595	0.000916875	0.000804605	0.00318099	0.00182627	7.86e-05	0.0340965
16	6	K	Plasma	Free flow	citrate	hemolysis	stored immediately	until analysis	-80C	sample	hemolysis	151	151-C	136	0.00380597	0.0321782	0.00351017	0.00170086	0.0243001	0.00799156	0.00469338	0.00285448	0.0228506	0.00291364	0.00176495	0.00597025	0.00347073	0.00329818	0.013523	0.00159733	0.000665552	0.00100079	0.126642	0.00108953	0.000172551	0.0136709	0.00284462	0.00562515	0.00114869	0.574707	0.00364821	0.00133603	0.0205631	0.00142478	0.00010353	0.0051075	0.00413135	0.000414122	0.0726438
1	7	F	Serum	Free flow	clot activator	0.5h,RT	stored immediately	until analysis	-80C	reference	none	93	93-A		0.00324405	0.0378476	0.00423317	0.000500685	0.0272206	0.0128636	0.00384879	0.00307511	0.0255533	0.00140779	0.00109318	0.00474121	0.00328689	0.00368597	0.0115304	0.00140657	0.000217902	0.000383165	0.0778657	0.000368475	0	0.0178827	0.00631426	0.00416829	0.000232592	0.55506	0.0121731	0.00206762	0.0359697	0.000443149	0.000266869	0.00644035	0.00614288	0.000194643	0.117434
1	7	F	Serum	Free flow	clot activator	0.5h,RT	stored immediately	until analysis	-80C	reference	none	93	93-B		0.00499282	0.0680255	0.00648081	0.00119072	0.0556994	0.0214297	0.00655143	0.00672716	0.0358908	0.00292835	0.00150113	0.00550852	0.00788011	0.00555451	0.0172416	0.00145678	0.000339971	0.000454937	0.0950589	0.00100185	0.000123178	0.0193997	0.00366249	0.00346869	4.93e-05	0.495359	0.00860604	0.00237651	0.0295512	0	0.000428659	0.00353767	0.00440649	0.000261137	0.0765001
1	7	F	Serum	Free flow	clot activator	0.5h,RT	stored immediately	until analysis	-80C	reference	none	93	93-C		0.00447338	0.0431085	0.00343093	0.00137323	0.0372862	0.0160091	0.00673727	0.00578217	0.0295151	0.00264193	0.00161523	0.00442183	0.00648668	0.00496596	0.0133843	0.00161236	0.000431013	0.000353689	0.0921324	0.00088637	4.3e-06	0.0182057	0.00340515	0.00405095	0.000170401	0.545152	0.0100751	0.00216652	0.0320267	0.000767519	0.000168969	0.00440178	0.00565473	0.000346529	0.0904613
2	7	A	Serum	Free flow	clot activator	6h,RT	stored immediately	until analysis	-80C	sample	none	94	94-A		0.00294967	0.0145012	0.00242489	0.000483229	0.0172148	0.00696856	0.00412166	0.00249049	0.0146368	0.00116762	0.00118293	0.00420256	0.00397297	0.00378712	0.00772729	0.00194166	0.000561945	0.000522587	0.0711659	0.00111514	0	0.0201775	0.00628854	0.00622294	0.000159619	0.567803	0.0125224	0.0043753	0.0407224	0.000732497	0.000585997	0.00943937	0.00943718	0.000408886	0.142222
2	7	A	Serum	Free flow	clot activator	6h,RT	stored immediately	until analysis	-80C	sample	none	94	94-B		0.00605354	0.0572826	0.00542272	0.00163356	0.0580585	0.0137592	0.00550368	0.00950114	0.0254185	0.00272823	0.00181235	0.00528357	0.012382	0.0038094	0.0110698	0.00175247	0.000523718	0.000582753	0.0733121	0.00122454	4.89e-05	0.0178823	0.00376807	0.00447648	0.000116382	0.524542	0.0113127	0.00268353	0.0326122	0.000524562	0.000618173	0.00562597	0.00495804	0.000254691	0.0852851
2	7	A	Serum	Free flow	clot activator	6h,RT	stored immediately	until analysis	-80C	sample	none	94	94-C		0.00443511	0.042219	0.00421199	0.000954501	0.0395633	0.0123987	0.00569	0.0048193	0.0229461	0.00203199	0.0014323	0.00399541	0.00590876	0.00383868	0.00889198	0.000964296	0.000584455	1.31e-05	0.0740777	0.0011417	4.35e-06	0.0152492	0.00325096	0.00362536	0	0.548608	0.00976921	0.00301696	0.0337166	0.0001872	0.000469088	0.00545056	0.0059523	0.000552892	0.11901
3	7	B	Serum	Free flow	clot activator	2h,RT	stored immediately	until analysis	-80C	sample	none	95	95-A		0.00353424	0.0216182	0.00386856	0.00140551	0.0199023	0.010132	0.00487835	0.00254493	0.0190494	0.00193087	0.00159314	0.00641008	0.00523655	0.00521267	0.0118854	0.000641349	0.000573121	0.000122812	0.0860397	0.0014908	4.78e-05	0.0208302	0.00467366	0.00588813	0.000416195	0.559205	0.0142598	0.00218332	0.0405073	0.00121106	0.000648172	0.00767231	0.00932686	0.000566298	0.114716
3	7	B	Serum	Free flow	clot activator	2h,RT	stored immediately	until analysis	-80C	sample	none	95	95-B		0.00476479	0.0343078	0.00476705	0.00153481	0.0400201	0.014466	0.00590093	0.00849621	0.0360967	0.00334518	0.00292054	0.00905411	0.0137229	0.00700771	0.0211259	0.00366479	0.000696818	0.000510473	0.107836	0.00193686	9.49e-05	0.0278693	0.00452649	0.00863851	6.32e-05	0.488887	0.0165124	0.00356201	0.0376259	0.000271047	0.000627926	0.00719631	0.00674343	0.00031961	0.0693667
3	7	B	Serum	Free flow	clot activator	2h,RT	stored immediately	until analysis	-80C	sample	none	95	95-C		0.00840093	0.0627252	0.00509147	0.00326376	0.0603187	0.0200482	0.00914942	0.0085206	0.0320937	0.00436692	0.00198872	0.00583343	0.0107878	0.00634041	0.0153288	0.00224112	0.000979129	0.000432993	0.0921143	0.00096825	3.92e-05	0.0205421	0.00288517	0.00428641	0.000365542	0.497004	0.00978694	0.00190386	0.0261166	3.92e-05	0.00021976	0.0042603	0.00506971	0.000243694	0.069701
4	7	C	Serum	Free flow	clot activator	2h,4C	stored immediately	until analysis	-80C	sample	none	96	96-A		0.00285627	0.0326821	0.0034105	0.000623664	0.0378207	0.0140364	0.00421759	0.00610168	0.0212963	0.00216841	0.00194305	0.00563656	0.00673583	0.00627332	0.00961569	0.00219461	0.000103507	0.000698346	0.0738661	0.000550291	0	0.018875	0.0045006	0.00476919	0.00024108	0.514775	0.013908	0.00391231	0.0394218	0.000433682	0.000805784	0.00901037	0.00681313	0.000162467	0.136762
4	7	C	Serum	Free flow	clot activator	2h,4C	stored immediately	until analysis	-80C	sample	none	96	96-B		0.0127216	0.0845446	0.00825826	0.00322436	0.0901569	0.0141442	0.00685127	0.0103023	0.0220155	0.00216911	0.00205186	0.00499873	0.0125105	0.00262639	0.00695679	0.00116468	4.3e-05	0.000597972	0.0579446	0.000742579	0.00027749	0.00887577	0.00191898	0.00123894	0	0.550036	0.00313446	0.00272409	0.0164853	9.38e-05	0.000551072	0.00170793	0.00170402	0.000214957	0.0624079
4	7	C	Serum	Free flow	clot activator	2h,4C	stored immediately	until analysis	-80C	sample	none	96	96-C		0.0165829	0.127202	0.0114957	0.00236568	0.100574	0.0206119	0.00596965	0.0151274	0.0267618	0.00390892	0.000637625	0.00618219	0.0126093	0.00144159	0.00954128	0.000854788	0.0013769	0.000110891	0.0570813	0.000475909	8.78e-05	0.00958748	0.000822444	0.00179736	0	0.496756	0.00440793	0.00309572	0.013575	0	0.000577559	0.00217624	0.00131683	0.000263367	0.04121
5	7	D	Serum	Free flow	clot activator	0.5h,RT	6h,RT	until analysis	-80C	sample	none	101	101-A		0.00191171	0.0285907	0.00173185	0.000236437	0.0324141	0.00980709	0.00250179	0.00479139	0.0216977	0.00238054	0.00147723	0.00385777	0.00735987	0.00219058	0.00882093	0.00170962	0.000456708	0.000385979	0.0828722	0.00142873	2.02e-06	0.0162253	0.00256443	0.00480756	0	0.583074	0.012123	0.00169952	0.0337822	6.47e-05	0.000628478	0.0059857	0.00522991	0.00034152	0.108484
5	7	D	Serum	Free flow	clot activator	0.5h,RT	6h,RT	until analysis	-80C	sample	none	101	101-B		0.00226771	0.0529043	0.00413156	0.00116089	0.0508816	0.0174151	0.00369221	0.00769197	0.033502	0.00262764	0.00256512	0.00572842	0.0112034	0.00372939	0.0156695	0.00227447	0.000708026	0.000736753	0.10787	0.00166445	0.000145323	0.0197639	0.00322076	0.00378853	0	0.541322	0.0110158	0.0011761	0.0252997	0.000473144	0.000239952	0.00286083	0.00232348	0	0.0558411
5	7	D	Serum	Free flow	clot activator	0.5h,RT	6h,RT	until analysis	-80C	sample	none	101	101-C		0.00205536	0.0605922	0.00370522	0.00181171	0.0702356	0.017863	0.00428302	0.0102855	0.033159	0.00269407	0.00229031	0.00490606	0.014264	0.0037905	0.0135609	0.00226942	0.000558654	0.00083015	0.0963531	0.000918908	0.000287159	0.018279	0.00244346	0.00386881	0.000222766	0.517859	0.0107641	0.00107554	0.0273567	0	0	0.00322836	0.00228161	0.000191439	0.0613824
6	7	E	Serum	Free flow	gel	0.5h,RT	6h,RT	until analysis	-80C	sample	none	102	102-A		0.00207438	0.0253548	0.00142088	0.000307767	0.0306032	0.00816057	0.0025584	0.00540016	0.0183982	0.00142359	0.00149003	0.00336374	0.00689425	0.00324443	0.00981329	0.00126496	0.000408096	0.000564013	0.0929443	0.00119988	0	0.0193378	0.00342069	0.00545168	0.000131513	0.580538	0.0138197	0.00266686	0.0376967	0.000601976	0.000730777	0.00566183	0.00435619	0.000459617	0.0997965
6	7	E	Serum	Free flow	gel	0.5h,RT	6h,RT	until analysis	-80C	sample	none	102	102-B		0.00187768	0.040745	0.00249679	0.000880322	0.0469497	0.00922472	0.00264266	0.00673641	0.0178219	0.00173774	0.00136374	0.00420485	0.00926713	0.00333216	0.00843345	0.00163004	0.000472389	0.000548717	0.0861859	0.00119072	0.000274783	0.0185419	0.00256464	0.00536844	0.000132303	0.550833	0.0132718	0.00229664	0.0394126	0.000702222	0.000710703	0.00713756	0.00456444	0.000403693	0.0972612
6	7	E	Serum	Free flow	gel	0.5h,RT	6h,RT	until analysis	-80C	sample	none	102	102-C		0.00247575	0.0487099	0.00220417	0.00113482	0.0570368	0.0133353	0.00264185	0.00745513	0.0271132	0.00195684	0.00177134	0.00424102	0.00974296	0.00345053	0.0125897	0.00198957	5.09e-05	0.000190349	0.100199	0.00123787	0.000137003	0.0183414	0.00275703	0.00437196	0	0.548184	0.0116974	0.00154583	0.0306353	0.000172163	0.000783219	0.0041901	0.00316561	5.82e-05	0.0705128
7	7	F	Serum	Free flow	clot activator	0.5h,RT	stored immediately	2 M	-80C	sample	none	100	100-A		0.00495194	0.0555134	0.00561016	0.00147657	0.0565255	0.0172932	0.00931985	0.00962894	0.0291064	0.00508264	0.00244447	0.00460105	0.0124679	0.00950059	0.0132692	0.00307678	0.000591101	0.000658807	0.105222	0.00186632	0	0.0252213	0.00220191	0.00717092	6.83e-05	0.471904	0.015275	0.00476825	0.0388584	0.00123519	0.000945526	0.00769844	0.00775437	0.000334408	0.0621568
7	7	F	Serum	Free flow	clot activator	0.5h,RT	stored immediately	2 M	-80C	sample	none	100	100-B		0.00650054	0.0568272	0.00686581	0.00234039	0.065607	0.0160505	0.00709555	0.0101979	0.0309837	0.00572371	0.00299325	0.00464607	0.0127647	0.00726249	0.0134771	0.00249245	0.00109747	0.000623113	0.0941892	0.00212553	0.000390065	0.0226155	0.00158175	0.00607742	0.000619807	0.448501	0.0171199	0.0058047	0.0366364	0.00138506	0.00109086	0.00871366	0.00927893	0.00126441	0.0776775
7	7	F	Serum	Free flow	clot activator	0.5h,RT	stored immediately	2 M	-80C	sample	none	100	100-C		0.0112511	0.077799	0.007088	0.00218262	0.0795021	0.0132776	0.00680691	0.0114128	0.0248448	0.00451773	0.00281279	0.00283116	0.0127485	0.0052912	0.00935881	0.00380121	0.000376631	0.000887378	0.0850046	0.00026456	0.000352747	0.0113724	0.000534632	0.00309204	0.000734889	0.4926	0.00785412	0.00289362	0.0266342	0.000604446	0	0.00302958	0.00603527	0.00108212	0.0698512
8	7	F	Serum	Free flow	clot activator	0.5h,RT	stored immediately	2 M	-20C	sample	none	99	99-A		0.00344547	0.0308983	0.00461509	0.00121492	0.0268346	0.0108799	0.00515178	0.00436486	0.0173496	0.00219545	0.00155006	0.00316354	0.00519708	0.00528426	0.00809453	0.00186597	0.000312504	0.000430259	0.0737113	0.00046083	0.000432524	0.0151678	0.00191918	0.00458905	0.000538956	0.518386	0.012841	0.00336281	0.0395261	0.00208223	0.000349868	0.00968762	0.00990615	0.000417804	0.156025
8	7	F	Serum	Free flow	clot activator	0.5h,RT	stored immediately	2 M	-20C	sample	none	99	99-B		0.0096804	0.0710488	0.00886704	0.00257628	0.0561746	0.0184687	0.00928434	0.00869587	0.0319261	0.00424923	0.00313851	0.00339963	0.00932182	0.00656188	0.0125953	0.00188036	0.000362328	0.000171169	0.0924411	0.00122817	0	0.0190772	0.000640946	0.00448537	1.25e-05	0.471836	0.0124441	0.00280117	0.033088	0.000693421	0.000274869	0.00554861	0.00637697	0.000670931	0.0833841
8	7	F	Serum	Free flow	clot activator	0.5h,RT	stored immediately	2 M	-20C	sample	none	99	99-C		0.0121087	0.0689285	0.0081226	0.00304204	0.0628584	0.0170284	0.0101716	0.00875549	0.0310463	0.00341268	0.00272735	0.00529735	0.0104059	0.00770301	0.0136298	0.00301757	0.000472041	0.001028	0.0945131	0.00122731	0.000440572	0.0197138	0.00281476	0.00425187	4.2e-05	0.461037	0.0136367	0.00516448	0.0336863	0.000143361	8.74e-05	0.00579037	0.00597219	0.000667851	0.073058
9	7	F	Serum	Free flow	clot activator	0.5h,RT	24h,4C	until analysis	-80C	sample	none	97	97-A		0.00696218	0.0512638	0.00703845	0.00151028	0.0548593	0.0225465	0.0107722	0.00927337	0.0409721	0.00404077	0.00308254	0.00840095	0.0121461	0.00882619	0.0184829	0.00362697	0.000964903	0.000753235	0.109408	0.00199464	0.000279364	0.0227925	0.00431441	0.00629285	5.43e-05	0.467623	0.0141208	0.00311019	0.0319419	0.000974438	0.000329898	0.00467864	0.00492844	0.000162088	0.0575366
9	7	F	Serum	Free flow	clot activator	0.5h,RT	24h,4C	until analysis	-80C	sample	none	97	97-B		0.00623917	0.0526815	0.00514943	0.00147752	0.055387	0.0186618	0.00905401	0.00874976	0.0353182	0.00418	0.00237337	0.00657624	0.01063	0.00718176	0.015669	0.00263388	0.00056078	0.000573706	0.107635	0.00155507	0.000168035	0.0204396	0.00376339	0.00506094	5.47e-05	0.504658	0.0110108	0.00268856	0.0296557	0.000686061	0	0.00388668	0.00453596	0.000291327	0.0569371
9	7	F	Serum	Free flow	clot activator	0.5h,RT	24h,4C	until analysis	-80C	sample	none	97	97-C		0.00770898	0.0658362	0.00565946	0.00267133	0.053661	0.0177361	0.00874177	0.00737827	0.0296372	0.00344619	0.00236417	0.00454212	0.00922659	0.00692556	0.0123271	0.00224859	0.000648569	0.000683887	0.0984658	0.00147801	0.000189433	0.0178699	0.00196069	0.00429168	5.14e-05	0.514761	0.0116646	0.00216511	0.0294821	0.000544755	0.0002194	0.00405944	0.00417824	0.000301809	0.0626062
10	7	F	Serum	Free flow	clot activator	0.5h,RT	48h,4C	until analysis	-80C	sample	none	98	98-A		0.00623189	0.0844406	0.00595125	0.00159936	0.0799141	0.0227261	0.00913863	0.0105509	0.0408922	0.00326449	0.00174903	0.00554135	0.012542	0.0058407	0.0189037	0.00262327	0.000412738	0.000661061	0.0947568	0.00135104	2.83e-06	0.0197734	0.00421979	0.00481112	0	0.439943	0.0102311	0.00280299	0.028899	0.000401966	0.000577153	0.00445337	0.00416253	0.000399698	0.0647177
10	7	F	Serum	Free flow	clot activator	0.5h,RT	48h,4C	until analysis	-80C	sample	none	98	98-B		0.00637484	0.0948656	0.00703443	0.00203831	0.0951391	0.0359498	0.00760671	0.0151302	0.0638786	0.00523381	0.0033585	0.00576572	0.0197508	0.00590248	0.0320256	0.00348668	0.000612655	0.000742857	0.113673	0.00213571	0	0.0236594	0.00278521	0.00405997	4.04e-05	0.369574	0.0095345	0.0021241	0.0208913	0.000279076	0.000462771	0.00220182	0.00281801	2.22e-05	0.0386785
10	7	F	Serum	Free flow	clot activator	0.5h,RT	48h,4C	until analysis	-80C	sample	none	98	98-C		0.00776079	0.0842499	0.00747624	0.00214174	0.0849066	0.0306572	0.0094561	0.013004	0.0542135	0.00448916	0.00275649	0.00568316	0.0167553	0.00656033	0.0253333	0.00332421	0.000549731	0.00069362	0.10208	0.00172252	8.35e-05	0.0220759	0.00364934	0.00494066	4.38e-05	0.398409	0.0102793	0.00302444	0.0258217	0.000621214	0.000649346	0.00366318	0.00411975	0.000145734	0.0543897
11	7	H	Plasma	Free flow	citrate	0.5h,RT	stored immediately	until analysis	-80C	reference	none	92	92-A		0.00226082	0.0228304	0.00298584	0.000654858	0.0155685	0.0104504	0.00341072	0.00293907	0.0236996	0.00233488	0.0011421	0.00535191	0.00298974	0.00420591	0.00909786	0.000799083	0.000265062	0.000132531	0.084313	0.000417082	0.000370307	0.0157868	0.0057456	0.00342241	0.000417082	0.580976	0.0121188	0.000841961	0.0350505	0.000557409	0	0.00661485	0.00680195	0.00045996	0.122564
11	7	H	Plasma	Free flow	citrate	0.5h,RT	stored immediately	until analysis	-80C	reference	none	92	92-B		0.00296618	0.0252794	0.00371886	0.000877384	0.0181712	0.0120919	0.00409298	0.00290383	0.0189239	0.00209771	0.00256089	0.00397272	0.00317551	0.00646236	0.0103326	0.00154099	0	0.000302854	0.102663	0.000895199	0.00101545	0.0184562	0.00539347	0.00491246	0.000908561	0.557139	0.0122834	0.0028682	0.0342403	0.00122477	0.000347391	0.00634211	0.00557161	0.000734865	0.112648
11	7	H	Plasma	Free flow	citrate	0.5h,RT	stored immediately	until analysis	-80C	reference	none	92	92-C		0.00720265	0.0466674	0.00685134	0.00163641	0.0399902	0.0187678	0.00719733	0.00474879	0.0368619	0.00324317	0.00182424	0.00746499	0.00531454	0.0075243	0.0163086	0.00175428	0.000482863	0.000248656	0.105368	0.00093531	0.000124708	0.0183845	0.00536472	0.00355722	0.000247895	0.471538	0.00985801	0.00316409	0.0295961	0.000453968	0.000314051	0.00475411	0.00622171	0.000335343	0.1096
12	7	G	Plasma	Vacuum	citrate	0.5h,RT	stored immediately	until analysis	-80C	sample	none	91	91-A		0.0015723	0.010907	0.00301004	0.000748378	0.0156002	0.00806926	0.00429904	0.00253079	0.0173567	0.00218375	0.00162896	0.00748377	0.00309975	0.00587842	0.00903719	0.0019217	0.000498131	0.000273854	0.0896731	0.0018131	0	0.0186551	0.0101491	0.00518198	0	0.524575	0.0147574	0.00472871	0.0405706	0.000127484	0.00140468	0.00704939	0.00683691	0.0005241	0.154248
12	7	G	Plasma	Vacuum	citrate	0.5h,RT	stored immediately	until analysis	-80C	sample	none	91	91-B		0.00331084	0.0205753	0.00579162	0.00164485	0.0261603	0.0110561	0.00677078	0.00410333	0.0267403	0.00228119	0.00199002	0.0116642	0.00887352	0.00869858	0.0144796	0.00299384	0.00103317	0.000517759	0.11236	0.00241621	0.000180805	0.026981	0.0116678	0.00736955	0.000103317	0.50303	0.0165354	0.00350808	0.0388448	0.00130555	0.000246552	0.00759849	0.00597947	0.000672734	0.0927669
12	7	G	Plasma	Vacuum	citrate	0.5h,RT	stored immediately	until analysis	-80C	sample	none	91	91-C		0.00293896	0.0194419	0.00600841	0.000633773	0.019094	0.00662976	0.00330556	0.00343604	0.0150055	0.00159686	0.00104386	0.00505775	0.00319372	0.00328071	0.0055424	0.00118677	0	0.000552998	0.0809303	0.000111842	0.000229898	0.0138312	0.00470359	0.00380885	0	0.582095	0.0121535	0.00324342	0.0357274	0	0	0.00511989	0.00606433	0.000422515	0.139821
13	7	I	Plasma	Free flow	EDTA	0.5h,RT	stored immediately	until analysis	-80C	sample	none	104	104-A		0.00518247	0.0440368	0.0054	0.0013882	0.054254	0.0173889	0.00601802	0.007051	0.0318612	0.0034642	0.00173713	0.00640091	0.010033	0.00818456	0.0154657	0.0026255	0.0007073	0.000782746	0.115649	0.00108767	1.76e-05	0.0200553	0.00477569	0.00520321	1.13e-05	0.486956	0.0111332	0.00271729	0.0326754	0.00052686	0.000197415	0.00397346	0.00422431	7.17e-05	0.0813477
13	7	I	Plasma	Free flow	EDTA	0.5h,RT	stored immediately	until analysis	-80C	sample	none	104	104-B		0.00595175	0.040255	0.00638057	0.00185576	0.0433504	0.0107501	0.00635346	0.0041921	0.0214781	0.00203814	0.00197652	0.00433258	0.00445827	0.00505221	0.0088081	0.00144173	0.000478112	0.000113367	0.0867822	0.00063091	6.16e-05	0.0134685	0.0041231	0.00349219	0.0003401	0.537208	0.00898061	0.00223529	0.0324623	0.000727025	8.13e-05	0.00579649	0.00450756	0.000399248	0.113808
13	7	I	Plasma	Free flow	EDTA	0.5h,RT	stored immediately	until analysis	-80C	sample	none	104	104-C		0.00133385	0.0143023	0.00341288	0.00114383	0.0257804	0.00764171	0.00393698	0.00372088	0.0197544	0.00190515	0.00176233	0.00381775	0.00622962	0.00481255	0.00932455	0.00203431	0.000424747	0.00038873	0.0900798	0.00202686	0	0.0213069	0.00413817	0.00575519	3.48e-05	0.555855	0.0146227	0.00257704	0.0445077	0.000245906	9.94e-06	0.010066	0.00665436	0.000291858	0.11766
14	7	J	Plasma	Free flow	Li heparin	0.5h,RT	stored immediately	until analysis	-80C	sample	none	103	103-A		0.0036666	0.0211107	0.00247265	0.00068172	0.0157944	0.00773808	0.00412987	0.00257999	0.0151447	0.00151975	0.000877573	0.00347639	0.00322405	0.00372498	0.00734449	0.000647822	9.79e-05	0.000580027	0.0811529	0.000691136	0.000116759	0.0136344	0.00374569	0.00347451	0.000282481	0.57168	0.00980772	0.00195665	0.033651	0.000538596	0.000290013	0.0058756	0.00644621	0.000244816	0.157055
14	7	J	Plasma	Free flow	Li heparin	0.5h,RT	stored immediately	until analysis	-80C	sample	none	103	103-B		0.00539587	0.0431868	0.00463746	0.00123707	0.0390579	0.0147255	0.0075194	0.00509251	0.0276818	0.00284216	0.00127686	0.00509872	0.00593297	0.00553885	0.0125025	0.00151432	0.000278496	0	0.102213	0.000508505	6.59e-05	0.0168975	0.00386911	0.00528024	3.85e-05	0.517985	0.0116919	0.00326114	0.0336023	0.000380446	0.000523424	0.00558858	0.00640417	0.000109409	0.0990316
14	7	J	Plasma	Free flow	Li heparin	0.5h,RT	stored immediately	until analysis	-80C	sample	none	103	103-C		0.00526975	0.0498875	0.00612565	0.00139315	0.046078	0.0171181	0.00742137	0.00623495	0.0286768	0.00315105	0.00181847	0.00590575	0.00839315	0.00702238	0.0138288	0.00198702	0.000645222	0.000484575	0.102885	0.00115876	5.79e-05	0.0210316	0.00435327	0.00436117	2.37e-05	0.504316	0.0127807	0.00261776	0.0344087	0.00101919	0.000173815	0.00592155	0.00620203	0.000451655	0.0780336
15	7	K	Plasma	Free flow	citrate	hemolysis	stored immediately	until analysis	-80C	sample	hemolysis	105	105-A	626	0.00490188	0.0328864	0.00483254	0.00123913	0.0283622	0.0116564	0.00770483	0.00353141	0.0231863	0.0023453	0.00120406	0.00575353	0.00451277	0.00893499	0.0109483	0.00167883	0.0003883	0.000277357	0.102048	0.00119427	0	0.0186531	0.00591995	0.00476321	7.83e-05	0.532644	0.0110266	0.00284373	0.0351077	0.00121058	0.000434799	0.00568338	0.00573233	0.000230859	0.105495
15	7	K	Plasma	Free flow	citrate	hemolysis	stored immediately	until analysis	-80C	sample	hemolysis	105	105-B	626	0.00509107	0.042604	0.00512114	0.000873576	0.0378592	0.0112288	0.00563713	0.00446546	0.0201531	0.00217157	0.00117101	0.00537914	0.00500819	0.00604418	0.00983591	0.0012726	0.000368947	0.000441132	0.0882298	0.00118905	0	0.0173987	0.0067286	0.00456906	0.00011563	0.507986	0.0129292	0.00319019	0.036225	0.00103064	0.000844835	0.00655015	0.00562711	0.000501287	0.123682
15	7	K	Plasma	Free flow	citrate	hemolysis	stored immediately	until analysis	-80C	sample	hemolysis	105	105-C	626	0.00338871	0.0223097	0.00349222	0.000537621	0.0213534	0.00839183	0.00414957	0.00300712	0.0172054	0.00176272	0.00112777	0.0053623	0.00329215	0.00580723	0.00877032	0.00154334	0.00024332	0.00034451	0.0883328	0.00104434	3.4e-05	0.0163758	0.00574698	0.00441297	8.88e-05	0.552863	0.0113148	0.00320873	0.0396889	0.000789437	0.000498226	0.00617878	0.00628306	0.000400898	0.136594
16	7	K	Plasma	Free flow	citrate	hemolysis	stored immediately	until analysis	-80C	sample	hemolysis	152	152-A	378	0.00502294	0.0572833	0.00562516	0.00103618	0.0605217	0.0151146	0.00624362	0.00684141	0.0277701	0.00303029	0.00176829	0.007513	0.0106009	0.00558531	0.0121625	0.0018967	6.05e-05	0.00090038	0.114083	0.00165611	7.82e-05	0.0186851	0.00394396	0.00401481	0.000460522	0.523193	0.011119	0.00202659	0.028021	0.000332107	0	0.00358971	0.00285465	0	0.0533438
16	7	K	Plasma	Free flow	citrate	hemolysis	stored immediately	until analysis	-80C	sample	hemolysis	152	152-B	378	0.00273573	0.0429435	0.00266995	0.000815198	0.0459001	0.01358	0.00239391	0.00699144	0.0262966	0.00222711	0.00198984	0.00498986	0.0111438	0.00421929	0.0136704	0.0023434	0.000661321	0.00101958	0.12144	0.00107127	4.7e-06	0.0206031	0.00310457	0.00489823	3.99e-05	0.53946	0.0113693	0.00171145	0.0327407	0.000128035	0.00069656	0.00403253	0.00231873	0.000218482	0.065264
16	7	K	Plasma	Free flow	citrate	hemolysis	stored immediately	until analysis	-80C	sample	hemolysis	152	152-C	378	0.00548585	0.0463071	0.0050649	0.000970405	0.0458008	0.0123765	0.00625681	0.00581955	0.0233645	0.00288341	0.00139711	0.00650037	0.00741132	0.00524613	0.0102439	0.00156684	0.000335614	0.000571503	0.103638	0.000822734	8.92e-05	0.0177041	0.00529599	0.00397176	0.000289587	0.530064	0.0125155	0.00282779	0.0349528	0.000411367	7.77e-05	0.0061053	0.00413956	0.000333696	0.0825074
1	8	F	Serum	Free flow	clot activator	0.5h,RT	stored immediately	until analysis	-80C	reference	none	108	108-A		0.00381591	0.0467044	0.00526049	0.00116044	0.0346114	0.0135243	0.00473205	0.00596419	0.0344069	0.00447712	0.00170747	0.00733441	0.00754154	0.00585	0.0214243	0.00332731	0.000605447	0.000613414	0.0970707	0.00264751	0.000443464	0.0348292	0.00692812	0.00555525	0.00039301	0.52048	0.0242099	0.00542247	0.0285702	0.00022306	0.00155345	0.00512771	0.00474798	0.00125604	0.0306548
1	8	F	Serum	Free flow	clot activator	0.5h,RT	stored immediately	until analysis	-80C	reference	none	108	108-B		0.00257167	0.0395607	0.00557318	0.00131918	0.0279771	0.0110352	0.00576587	0.00439481	0.0226781	0.00320161	0.000904159	0.00395014	0.0035277	0.00410577	0.0124137	0.00115614	0.000303857	0.000689236	0.0816115	0.0015267	0.000118578	0.0244271	0.00410577	0.00254202	0.000807814	0.627761	0.0138588	0.00203806	0.0228782	0.000363146	0.000415024	0.00330537	0.00338689	0.000711469	0.0333575
1	8	F	Serum	Free flow	clot activator	0.5h,RT	stored immediately	until analysis	-80C	reference	none	108	108-C		0.0042524	0.0311057	0.00483342	0.00108205	0.0226893	0.0095279	0.00452607	0.00181464	0.0257165	0.00287984	0.000842059	0.00527129	0.00453028	0.00762485	0.0124162	0.00194516	0.00029051	0.000597862	0.0877384	0.00153676	0	0.0283858	0.00441239	0.00413872	0	0.585943	0.0238219	0.00315772	0.0289121	0.000206304	0.000303141	0.00612177	0.0044166	0.000871531	0.0415893
2	8	A	Serum	Free flow	clot activator	6h,RT	stored immediately	until analysis	-80C	sample	none	109	109-A		0.00662502	0.0783185	0.00838898	0.00221804	0.0762547	0.0172873	0.00920983	0.011978	0.0403032	0.00614765	0.00135062	0.00803968	0.0200876	0.00630774	0.0197528	0.00301561	0.000951838	0.000841227	0.099093	0.00299814	0.00060545	0.0318211	0.00342021	0.00407806	0.000352209	0.474516	0.0163908	0.0021511	0.0190164	0.000259063	0.000620004	0.00292246	0.00237814	0.000561788	0.0122575
2	8	A	Serum	Free flow	clot activator	6h,RT	stored immediately	until analysis	-80C	sample	none	109	109-B		0.00643625	0.067783	0.00981212	0.0028921	0.0630452	0.018846	0.00568956	0.00820043	0.0396534	0.00385964	0.00265811	0.0087473	0.0106456	0.00572374	0.0172737	0.00277642	0.00123309	0.00108322	0.0910198	0.0031892	0.000375973	0.0262077	0.00450905	0.00342057	5.52e-05	0.513574	0.0141845	0.00249773	0.0152808	0.000365457	0.000512691	0.00251613	0.00236101	0.00103853	0.0231342
2	8	A	Serum	Free flow	clot activator	6h,RT	stored immediately	until analysis	-80C	sample	none	109	109-C		0.00544168	0.0672167	0.00718389	0.00190495	0.068879	0.0159443	0.00838265	0.0124279	0.0369235	0.00529492	0.00223334	0.0101597	0.0168961	0.0089072	0.0216723	0.00345536	0.00056669	0.000838411	0.102337	0.00270267	0.000233941	0.034122	0.00523244	0.00512636	0.000271721	0.458868	0.020504	0.00267507	0.0231791	0.000271721	0.00124672	0.00425599	0.00352365	0.000664044	0.0230134
3	8	B	Serum	Free flow	clot activator	2h,RT	stored immediately	until analysis	-80C	sample	none	110	110-A		0.00474957	0.0811728	0.00661853	0.00130799	0.0858975	0.0169681	0.00661301	0.0141178	0.046921	0.00610305	0.00182761	0.00788655	0.0217893	0.00692313	0.0261075	0.00419412	0.000803541	0.000741518	0.102853	0.00317695	4.82e-05	0.0340064	0.00273038	0.00492875	0.000159881	0.427716	0.0202208	0.00293851	0.0201175	0.000321141	0.000457591	0.00383853	0.00290129	0.000777353	0.017496
3	8	B	Serum	Free flow	clot activator	2h,RT	stored immediately	until analysis	-80C	sample	none	110	110-B		0.00897866	0.0856044	0.00578139	0.00160407	0.0768996	0.0126833	0.00626499	0.0117546	0.0284234	0.00346528	0.00161594	0.00467674	0.0152061	0.00263852	0.0121749	0.00219547	0.000876208	0.000415358	0.0746676	0.0012352	0.000146364	0.0220981	0.00115905	0.00214206	1.09e-05	0.53562	0.0130601	0.00237842	0.0178258	0.000258116	0.000933567	0.00259698	0.00326551	0.00104828	0.0213109
3	8	B	Serum	Free flow	clot activator	2h,RT	stored immediately	until analysis	-80C	sample	none	110	110-C		0.00305067	0.0612276	0.0028234	0.00112324	0.0459874	0.0132123	0.00389857	0.00651655	0.0277838	0.00284088	0.000476394	0.001368	0.00881111	0.00363633	0.0135357	0.00243879	0.000603142	0.000131118	0.0857291	0.00167831	6.56e-05	0.0278669	0.000935307	0.00327357	6.56e-05	0.569776	0.0169535	0.00160838	0.0218792	0.000546324	0.000909083	0.00351833	0.00385486	0.00124999	0.0332383
4	8	C	Serum	Free flow	clot activator	2h,4C	stored immediately	until analysis	-80C	sample	none	111	111-A		0.00258165	0.0328753	0.00143053	0.000499158	0.0312454	0.00418827	0.00144217	0.00428286	0.013144	0.000564645	0.000995405	0.00192314	0.00770347	0.00069853	0.00795087	0.000828777	1.46e-05	0.000248851	0.0593416	0.00113147	6.77e-05	0.0242761	0.00221492	0.00277011	5.6e-05	0.615106	0.0243234	0.00670225	0.0298752	0.000376187	0.00269662	0.00668115	0.00673063	0.00226731	0.0510931
4	8	C	Serum	Free flow	clot activator	2h,4C	stored immediately	until analysis	-80C	sample	none	111	111-B		0.00327005	0.046239	0.00611559	0.000756869	0.0412336	0.010125	0.00358376	0.00613542	0.0242011	0.00294234	0.00124084	0.00597915	0.00830806	0.00344964	0.010609	0.0024677	0.000548118	0.000755703	0.0728658	0.00161753	0.000358026	0.0263575	0.00464967	0.00426366	0.000396511	0.541111	0.0217498	0.00382983	0.0292462	0.0001691	0.00112889	0.00647362	0.0057704	0.00124551	0.0520117
4	8	C	Serum	Free flow	clot activator	2h,4C	stored immediately	until analysis	-80C	sample	none	111	111-C		0.00526848	0.0559514	0.00503536	0.000676044	0.0557299	0.0148176	0.00594452	0.00864287	0.0326657	0.00343267	0.00166388	0.00749768	0.0143281	0.00578717	0.0177083	0.00320247	0.000906248	0.000215635	0.0876934	0.0027916	0.000128215	0.0336011	0.00436514	0.00429812	0.000151527	0.506441	0.024492	0.00324326	0.0245241	0.000399216	0.000588624	0.00590373	0.00389891	0.000976184	0.0306697
5	8	D	Serum	Free flow	clot activator	0.5h,RT	6h,RT	until analysis	-80C	sample	none	116	116-A		0.00138119	0.0551982	0.0034424	0.00120149	0.0428521	0.0111129	0.00233076	0.00599866	0.0268363	0.00234485	0.000799821	0.00282404	0.0082977	0.00252983	0.0136304	0.0018269	0.000310063	0.000798059	0.0874395	0.00137943	2.47e-05	0.027585	0.00187976	0.00365733	3.52e-05	0.579123	0.0212094	0.00257564	0.0251979	3.52e-05	0.000792774	0.00451705	0.00273067	0.000512661	0.0306892
5	8	D	Serum	Free flow	clot activator	0.5h,RT	6h,RT	until analysis	-80C	sample	none	116	116-B		0.00339081	0.0709792	0.00479292	0.000887048	0.0636917	0.01164	0.00334483	0.00867938	0.0287913	0.00288495	0.00146445	0.00455379	0.011923	0.00383025	0.0147252	0.00261005	0.000670396	0.000435349	0.0872476	0.00206331	0	0.0302434	0.00371171	0.00525893	7.77e-05	0.518693	0.0225216	0.00394164	0.0235497	0.000538565	0.0011456	0.00479803	0.00365243	0.00150328	0.0253698
5	8	D	Serum	Free flow	clot activator	0.5h,RT	6h,RT	until analysis	-80C	sample	none	116	116-C		0.00290841	0.0816816	0.00359357	0.000936021	0.0742875	0.0122028	0.00263246	0.00977727	0.0280117	0.00284883	0.00150986	0.00404041	0.0142943	0.00286137	0.0155674	0.00200688	0.00067889	0.000895257	0.0931082	0.001952	8.62e-05	0.0288897	0.00233143	0.00404982	0.000161491	0.51917	0.0196784	0.00237847	0.0213889	5.8e-05	0.000379426	0.00374095	0.00224676	0.000710247	0.0195451
6	8	E	Serum	Free flow	gel	0.5h,RT	6h,RT	until analysis	-80C	sample	none	117	117-A		0.00265186	0.0494067	0.00337107	0.000839072	0.0484741	0.0130836	0.00219702	0.00896379	0.0327616	0.00300161	0.00219538	0.00420521	0.0134547	0.00384233	0.0175663	0.0030558	0.000517236	0.000591127	0.0979448	0.0025714	0.000101805	0.0352476	0.00366663	0.00538418	0	0.509699	0.0235925	0.00343346	0.0252559	0.000100163	0.000247945	0.00513788	0.0042397	0.00167814	0.0360752
6	8	E	Serum	Free flow	gel	0.5h,RT	6h,RT	until analysis	-80C	sample	none	117	117-B		0.00329794	0.0794361	0.00565624	0.00151386	0.0681697	0.0154242	0.0035958	0.0108795	0.0402477	0.00299701	0.00154149	0.00535838	0.0144937	0.00405026	0.0194007	0.00288339	0.000611071	0.000832161	0.0949524	0.00276671	0.000617212	0.0281338	0.00221705	0.00401955	0.000202667	0.499094	0.0187897	0.00307378	0.0195543	0.000574222	0.000196525	0.00339313	0.00116687	0.00021802	0.0223578
6	8	E	Serum	Free flow	gel	0.5h,RT	6h,RT	until analysis	-80C	sample	none	117	117-C		0.00311281	0.0720689	0.0041902	0.00134835	0.0538178	0.0130899	0.0027096	0.00741591	0.0338506	0.0028354	0.00120319	0.00317733	0.00853524	0.00225477	0.0131867	0.00151608	0.000358054	0.00069998	0.0772978	0.00158383	0.000122577	0.0228768	0.0022451	0.0024838	0.000122577	0.569067	0.0157673	0.00196446	0.0198188	0.000793525	0	0.00341603	0.00245154	0.000570951	0.0273411
7	8	F	Serum	Free flow	clot activator	0.5h,RT	stored immediately	2 M	-80C	sample	none	115	115-A		0.00381301	0.0570575	0.0112778	0.00203538	0.0558258	0.0142857	0.00800542	0.00671211	0.0371576	0.00548724	0.00202093	0.00483412	0.00918164	0.00692044	0.017387	0.00418557	0.00068657	0.000586207	0.0929013	0.00238893	0.00014142	0.030552	0.00257217	0.00604379	0.000233419	0.456116	0.0227929	0.00669234	0.028046	0.000786932	0.00249385	0.00782066	0.00719492	0.00212966	0.0410474
7	8	F	Serum	Free flow	clot activator	0.5h,RT	stored immediately	2 M	-80C	sample	none	115	115-B		0.00988042	0.130838	0.00541371	0.000851574	0.11269	0.012833	0.00594661	0.0137386	0.0279795	0.00465395	0.00192999	0.00354852	0.0183602	0.00330367	0.0112037	0.0019462	0	0.000981201	0.0779073	0.000484299	1.44e-05	0.0202217	0.00088038	0.00152311	0.000401482	0.474159	0.0121633	0.00211903	0.0166786	0.000111623	0.000748953	0.00236028	0.00174816	0.000437489	0.0117474
7	8	F	Serum	Free flow	clot activator	0.5h,RT	stored immediately	2 M	-80C	sample	none	115	115-C		0.00577909	0.0437009	0.00326372	0.00197471	0.0372888	0.00563733	0.00277581	0.00688018	0.00907248	0.00314174	0.00211977	0.000161538	0.00856149	0	0.00430547	0.00146703	0.000451646	0.000161538	0.0485305	0.000214285	0	0.015979	0.000639557	0.00148021	0	0.577853	0.017334	0.00703842	0.0248043	0.000623073	0.00277251	0.00832413	0.0059637	0.00260438	0.0720524
8	8	F	Serum	Free flow	clot activator	0.5h,RT	stored immediately	2 M	-20C	sample	none	114	114-A		0.00553342	0.0484528	0.00329175	0.00206293	0.049622	0.00590579	0.00532489	0.00723887	0.0219847	0.00333644	0.00173525	0.00336623	0.0110222	0.00437162	0.0100242	0.00385776	0	0.000506423	0.0770583	0.00332899	0.000290449	0.0246658	0.00145969	0.00326196	0.000387265	0.592389	0.0192664	0.0060324	0.0279427	0.000893688	0.0012884	0.00752188	0.00528021	0.00204059	0.0227816
8	8	F	Serum	Free flow	clot activator	0.5h,RT	stored immediately	2 M	-20C	sample	none	114	114-B		0.00635846	0.0579863	0.00878621	0.00178826	0.0561425	0.00488803	0.00503354	0.00742491	0.0206837	0.00320125	0.00195675	0.00352099	0.0125044	0.00264027	0.00890683	0.0032204	0.000941995	0.000779252	0.0740825	0.00169444	0.000160828	0.0269579	0.00169827	0.00402262	0.000501631	0.523858	0.0243387	0.00755702	0.0328837	0.00158914	0.00208502	0.0104538	0.00546051	0.0026843	0.0357862
8	8	F	Serum	Free flow	clot activator	0.5h,RT	stored immediately	2 M	-20C	sample	none	114	114-C		0.0048761	0.0836103	0.00784933	0.00316535	0.0813354	0.00953569	0.00601355	0.0100846	0.0235175	0.00329648	0.0025585	0.00302812	0.0169703	0.00319584	0.00937712	0.00249752	0.000634289	0.00102767	0.0775907	0.00238164	0.000307996	0.0248837	0.000439123	0.00382098	0.000893494	0.502839	0.0187573	0.00522374	0.0260974	0.000292749	0.00151863	0.00581839	0.00537316	0.00133872	0.0237462
9	8	F	Serum	Free flow	clot activator	0.5h,RT	24h,4C	until analysis	-80C	sample	none	112	112-A		0.00355344	0.0453661	0.00391716	0.00119539	0.0446136	0.0136682	0.00649816	0.00720276	0.0319041	0.00524342	0.00213283	0.00612227	0.0130123	0.00765855	0.0173015	0.00364323	0.000953419	0.000538723	0.111765	0.00320343	9.05e-05	0.0354211	0.00427098	0.00571747	0.000157508	0.538657	0.0226789	0.00443458	0.0236217	0.000582856	0.000524266	0.00353214	0.0034317	0.000913851	0.0147555
9	8	F	Serum	Free flow	clot activator	0.5h,RT	24h,4C	until analysis	-80C	sample	none	112	112-B		0.00559406	0.0544301	0.00589493	0.0016508	0.0478047	0.0157651	0.0096891	0.0087288	0.0351078	0.00519734	0.00195522	0.00629876	0.0104115	0.00991986	0.0185919	0.00351814	0.00113337	0.000512101	0.107256	0.00344182	5.06e-05	0.0330647	0.0036708	0.00578666	0.000370985	0.499274	0.0214266	0.00414296	0.0252793	0.000568015	0.000643455	0.00417491	0.00429384	0.00112982	0.0228768
9	8	F	Serum	Free flow	clot activator	0.5h,RT	24h,4C	until analysis	-80C	sample	none	112	112-C		0.00448481	0.0658773	0.00648571	0.00139117	0.066308	0.0183616	0.00740214	0.0122377	0.0423477	0.00603117	0.00240677	0.00529013	0.0178428	0.00704035	0.0222331	0.00437829	0.000693291	0.000862252	0.1073	0.00374469	0.00011111	0.0366728	0.00283285	0.00645633	0.000489436	0.442365	0.0255544	0.00512668	0.0256655	0.000205692	0.000805319	0.00498435	0.00477682	0.00134893	0.020324
10	8	F	Serum	Free flow	clot activator	0.5h,RT	48h,4C	until analysis	-80C	sample	none	113	113-A		0.00630164	0.0747145	0.00839637	0.00204243	0.073828	0.0219773	0.00849159	0.0127039	0.0587478	0.00845002	0.00323598	0.00701508	0.0209286	0.00956175	0.0327192	0.00691316	0.00188419	0.000843527	0.112425	0.00607902	0	0.0389511	0.00407682	0.00643574	3.08e-05	0.386483	0.0253541	0.00567939	0.0201588	0.000523013	0.00100177	0.00351894	0.00270894	0.00122439	0.0120172
10	8	F	Serum	Free flow	clot activator	0.5h,RT	48h,4C	until analysis	-80C	sample	none	113	113-B		0.00538864	0.0627516	0.00576577	0.00159508	0.058113	0.0137845	0.00834835	0.00850618	0.0334716	0.00576716	0.00224457	0.00591382	0.0111335	0.00844472	0.0175739	0.00346812	0.00104057	0.000673231	0.11215	0.00230323	0.000328235	0.0319114	0.00314687	0.00511349	8.66e-05	0.499225	0.0210867	0.00451289	0.023179	0.00029192	0.000673231	0.00397514	0.0033899	0.00106292	0.0179175
10	8	F	Serum	Free flow	clot activator	0.5h,RT	48h,4C	until analysis	-80C	sample	none	113	113-C		0.00842169	0.102411	0.00907278	0.00184648	0.087315	0.0186692	0.0113694	0.0127129	0.0395293	0.00581158	0.00223805	0.00657291	0.017336	0.00893957	0.0213528	0.00312454	0.000886493	0.000438653	0.110194	0.00308206	0.0005087	0.0307609	0.00344262	0.00415687	0.000343344	0.420138	0.0170891	0.00260092	0.0180319	0.000477696	0.000545446	0.00236781	0.00204628	0.000887642	0.0133261
11	8	H	Plasma	Free flow	citrate	0.5h,RT	stored immediately	until analysis	-80C	reference	none	107	107-A		0.00951091	0.0858313	0.0110839	0.00150317	0.0628814	0.0165979	0.00745192	0.00745782	0.0357328	0.00454296	0.00158089	0.00845141	0.00689315	0.00729845	0.0157597	0.00219573	0.00020462	0.000519421	0.109394	0.00107032	2.26e-05	0.0252362	0.00646029	0.0028214	1.67e-05	0.458952	0.0172766	0.00327589	0.019978	0.000124936	0.000558771	0.00339788	0.00348838	0.000767326	0.0324845
11	8	H	Plasma	Free flow	citrate	0.5h,RT	stored immediately	until analysis	-80C	reference	none	107	107-B		0.00680154	0.0523184	0.0074179	0.0011249	0.043966	0.0120938	0.00883223	0.00514173	0.0263086	0.00385747	0.00102764	0.00945561	0.00669609	0.0079698	0.0140677	0.00196623	0.000402503	0.000249001	0.107722	0.00187483	5.33e-05	0.0258241	0.00662168	0.00377252	0.000249001	0.497656	0.017491	0.00356394	0.0240893	0.000701305	0.000495073	0.00456229	0.00449491	0.001262	0.0457436
11	8	H	Plasma	Free flow	citrate	0.5h,RT	stored immediately	until analysis	-80C	reference	none	107	107-C		0.00565601	0.0534442	0.0075719	0.00175382	0.0521843	0.0120211	0.00653871	0.00941254	0.0328566	0.00470965	0.00157824	0.0105692	0.013061	0.00763557	0.0202364	0.00326743	0.000878838	0.000668534	0.113607	0.00284007	7.14e-05	0.0332376	0.00684452	0.00478682	0.000273974	0.464253	0.0239756	0.00401699	0.0259021	0.000685899	0.000968555	0.00485146	0.00476656	0.0014702	0.0328421
12	8	G	Plasma	Vacuum	citrate	0.5h,RT	stored immediately	until analysis	-80C	sample	none	106	106-A		0.00431942	0.0378925	0.00571886	0.00101257	0.0370246	0.0110677	0.00640176	0.00561458	0.0254725	0.00332367	0.000851101	0.00804341	0.0069871	0.00620328	0.0140617	0.00258694	0.000904926	0.000494513	0.10192	0.00106976	0	0.0245642	0.00459191	0.0042185	0.000433961	0.547611	0.0164535	0.00237501	0.0193567	0.00124469	0.000279215	0.00406039	0.00337076	0.000982298	0.046639
12	8	G	Plasma	Vacuum	citrate	0.5h,RT	stored immediately	until analysis	-80C	sample	none	106	106-B		0.00841357	0.0794964	0.00905262	0.00193833	0.0777381	0.0184265	0.0085442	0.0110404	0.0444228	0.00332588	0.00180417	0.0112593	0.017219	0.00858304	0.02165	0.00381312	0.000921503	0.000794399	0.132929	0.00251383	0	0.0302295	0.00323056	0.00416618	0	0.439716	0.0138614	0.00220313	0.0166224	6.71e-05	0.000550783	0.00176886	0.00179711	0.000575498	0.010426
12	8	G	Plasma	Vacuum	citrate	0.5h,RT	stored immediately	until analysis	-80C	sample	none	106	106-C		0.0216037	0.152628	0.0160575	0.00406684	0.130259	0.0215934	0.00844592	0.0144323	0.0381858	0.00363687	0.00198607	0.0099278	0.0205262	0.00330671	0.0148469	0.00315826	0.000499077	0.000271293	0.0872182	0.00152794	8.96e-05	0.0151668	0.00182739	0.000432534	0.000115172	0.395195	0.00641122	0.00107494	0.0084536	0.000348074	0.000824117	0.00089578	0.00106726	0.00077293	0.00618344
13	8	I	Plasma	Free flow	EDTA	0.5h,RT	stored immediately	until analysis	-80C	sample	none	119	119-A		0.00778208	0.0734375	0.0076993	0.00208984	0.0805193	0.0178196	0.00575937	0.0117514	0.0422354	0.00574371	0.00247693	0.0077888	0.0183297	0.00864129	0.0225721	0.00309449	0.000375903	0.00101583	0.118577	0.00234939	3.36e-05	0.0299425	0.00465403	0.00435421	0.000543717	0.405543	0.0155105	0.00354646	0.0232635	0.000463166	0.000409466	0.00349053	0.00381273	0.00101359	0.0304481
13	8	I	Plasma	Free flow	EDTA	0.5h,RT	stored immediately	until analysis	-80C	sample	none	119	119-B		0.00465338	0.0626126	0.00758935	0.00112343	0.0626341	0.014272	0.00463683	0.00712856	0.032294	0.00412889	0.00141463	0.00594888	0.00902135	0.0056279	0.0163112	0.00211036	0.000411979	0.000537724	0.109393	0.0020508	0.000282098	0.028453	0.0047692	0.00410159	0.000157181	0.484732	0.0184787	0.00304931	0.0241537	0.000164626	0.000501324	0.00409167	0.00390553	0.000872767	0.0347245
13	8	I	Plasma	Free flow	EDTA	0.5h,RT	stored immediately	until analysis	-80C	sample	none	119	119-C		0.0062565	0.0525648	0.0057459	0.00101727	0.04809	0.0139125	0.00557636	0.00589879	0.0307621	0.0042396	0.000994728	0.00553912	0.00713068	0.00540583	0.0162106	0.00229425	0.000256767	0.000503734	0.0960829	0.0013201	1.27e-05	0.0248996	0.00364766	0.00385151	0.00034105	0.482343	0.0208236	0.00478254	0.0271723	0.000547836	0.00100551	0.00650543	0.0068945	0.00208256	0.0525501
14	8	J	Plasma	Free flow	Li heparin	0.5h,RT	stored immediately	until analysis	-80C	sample	none	118	118-A		0.0033265	0.0738942	0.00385216	0.0013623	0.0580392	0.0135277	0.00477908	0.00914185	0.0313148	0.00685764	0.00153284	0.00511514	0.0132749	0.00493859	0.0172755	0.00276372	0.000255807	0.00113157	0.135204	0.00269149	0.000148469	0.0317632	0.00283394	0.00453832	0.000258817	0.467199	0.0211207	0.00324524	0.0216383	0.000615944	0.000360137	0.00368764	0.00433267	0.00154488	0.0241703
14	8	J	Plasma	Free flow	Li heparin	0.5h,RT	stored immediately	until analysis	-80C	sample	none	118	118-B		0.00571563	0.0727584	0.00531533	0.000544739	0.0633396	0.0104807	0.00596049	0.00776665	0.0225241	0.00494529	0.00120228	0.00576103	0.0104174	0.00474583	0.0131563	0.00178141	0.000680923	0.000298506	0.136801	0.00157782	0.000231101	0.0289674	0.00321478	0.00340049	4.13e-05	0.502556	0.0180603	0.00196298	0.0192983	0.000105921	0.000661665	0.00310611	0.00321341	0.000865254	0.0199875
14	8	J	Plasma	Free flow	Li heparin	0.5h,RT	stored immediately	until analysis	-80C	sample	none	118	118-C		0.00227083	0.0426391	0.00287463	0.000732364	0.0392332	0.0111935	0.00411435	0.00584064	0.0260973	0.0050213	0.00112187	0.00404691	0.0100249	0.00664611	0.0149706	0.00231306	0.000451268	0.000615136	0.138418	0.00337631	0.000122901	0.0356142	0.00279206	0.00512592	9.64e-05	0.510994	0.0245796	0.00388809	0.0275116	0.000773331	0.00152965	0.00538433	0.00584001	0.00200675	0.0272758
15	8	K	Plasma	Free flow	citrate	hemolysis	stored immediately	until analysis	-80C	sample	hemolysis	120	120-A	722	0.00611373	0.0671435	0.00692902	0.0016454	0.0576343	0.0173777	0.00861055	0.00818623	0.0397202	0.0047648	0.00175472	0.008441	0.0142907	0.0102661	0.0204192	0.00368362	0.000677244	0.000779155	0.120517	0.00239861	0	0.0345219	0.00576631	0.00515484	5.93e-05	0.479458	0.0172582	0.00287574	0.0207917	0.000172322	0.000669833	0.00288315	0.00173341	0.000669833	0.0146817
15	8	K	Plasma	Free flow	citrate	hemolysis	stored immediately	until analysis	-80C	sample	hemolysis	120	120-B	722	0.00433175	0.0547336	0.00535694	0.00114648	0.0453254	0.0122721	0.00596185	0.00558716	0.0268365	0.00321926	0.00133808	0.00644548	0.00749848	0.00708052	0.0139053	0.00209364	0.000485941	0.000673673	0.0995329	0.00163628	0.00012979	0.0288297	0.00441055	0.0038713	5.02e-05	0.519116	0.0204821	0.00283144	0.0267414	0.000339927	0.000844409	0.00531599	0.00313505	0.000890763	0.0395536
15	8	K	Plasma	Free flow	citrate	hemolysis	stored immediately	until analysis	-80C	sample	hemolysis	120	120-C	722	0.00586926	0.0760175	0.00602976	0.00144453	0.0641779	0.018119	0.00803704	0.00914521	0.0390929	0.00557798	0.00174225	0.00801079	0.0111267	0.00949891	0.0199083	0.00267109	0.000548881	0.000695018	0.108015	0.00241993	6.94e-06	0.0323622	0.00581923	0.00494488	2.08e-05	0.447628	0.0202199	0.00318777	0.0245907	0.000587025	0.000427513	0.0042459	0.00278899	0.00071731	0.0278537
16	8	K	Plasma	Free flow	citrate	hemolysis	stored immediately	until analysis	-80C	sample	hemolysis	153	153-A	301	0.00857397	0.111615	0.0106979	0.00215781	0.0933038	0.0169735	0.00613765	0.0114268	0.0343479	0.00416205	0.00230357	0.00790763	0.0155524	0.00627821	0.0170022	0.00288662	0.000793886	0.000963075	0.106251	0.00228795	0	0.0266095	0.00379243	0.0045707	0.000452906	0.432311	0.0182151	0.000986501	0.0167731	0.000580448	3.64e-05	0.00254825	0.000861562	0.000848547	0.015037
16	8	K	Plasma	Free flow	citrate	hemolysis	stored immediately	until analysis	-80C	sample	hemolysis	153	153-B	301	0.00567274	0.083711	0.00539022	0.00167973	0.0786633	0.0142135	0.00571041	0.00892947	0.027261	0.00364713	0.00156844	0.00617615	0.0123437	0.0054433	0.0131536	0.00163864	0.000390397	0.000546213	0.106661	0.00144515	0.000393821	0.0243416	0.00284236	0.00356665	0.000597581	0.491616	0.0178709	0.00233724	0.0197407	0	0.000172939	0.00331495	0.00217629	0.000491421	0.023155
16	8	K	Plasma	Free flow	citrate	hemolysis	stored immediately	until analysis	-80C	sample	hemolysis	153	153-C	301	0.0047395	0.0644891	0.00488471	0.0016447	0.0626666	0.0124059	0.00623307	0.00906512	0.0286208	0.0035571	0.00130687	0.00872136	0.0135468	0.00741548	0.0138056	0.00291404	0.000665783	0.000942369	0.119086	0.00226109	0.000537368	0.0316257	0.00554753	0.00484322	0.000150147	0.494776	0.0214048	0.00274216	0.0228549	0	0.000437599	0.00372404	0.00172965	0.000717149	0.0205681
1	9	F	Serum	Free flow	clot activator	0.5h,RT	stored immediately	until analysis	-80C	reference	none	123	123-A		0.00574117	0.0351222	0.00591208	0.00212109	0.0335913	0.018972	0.00942175	0.00600444	0.0558617	0.00638131	0.0065947	0.00723803	0.0103411	0.00986869	0.0270784	0.00523903	0.00110619	0.000965	0.143398	0.00299585	9.34e-05	0.0334958	0.00258395	0.0129293	0	0.427786	0.0168891	0.0051042	0.0303948	0.00110089	0.00165929	0.0125078	0.00810961	0.00107859	0.039358
1	9	F	Serum	Free flow	clot activator	0.5h,RT	stored immediately	until analysis	-80C	reference	none	123	123-B		0.0058357	0.0409521	0.00605842	0.00226508	0.0387837	0.0147447	0.0100549	0.00719587	0.0415909	0.00603741	0.00599539	0.00878296	0.0117723	0.00894826	0.0208158	0.00347256	0.00128172	0.00108421	0.141714	0.00236734	0.000161091	0.029785	0.00211239	0.0119109	7.28e-05	0.466789	0.0130694	0.00338992	0.0284487	0.000665376	0.000446853	0.00948056	0.00569562	0.000610745	0.0371574
1	9	F	Serum	Free flow	clot activator	0.5h,RT	stored immediately	until analysis	-80C	reference	none	123	123-C		0.00722227	0.0501542	0.00722826	0.00237231	0.0430818	0.0170601	0.0113974	0.00588624	0.043761	0.00615259	0.00525762	0.00854202	0.00758539	0.0107799	0.0188586	0.00329725	0.000842726	0.00080333	0.144432	0.00120328	9.51e-05	0.026098	0.0038428	0.00917321	0.000160152	0.464017	0.0124628	0.00344284	0.0256663	8.65e-05	0.000858142	0.00811552	0.00543233	0.00060207	0.0352232
2	9	A	Serum	Free flow	clot activator	6h,RT	stored immediately	until analysis	-80C	sample	none	124	124-A		0.00466989	0.0612793	0.00406185	0.00126806	0.0444679	0.0195374	0.00554803	0.0059402	0.0536562	0.00713819	0.00377253	0.00583058	0.00749646	0.00702743	0.0267196	0.00184897	0.000718792	0.00070862	0.162711	0.00139238	0.000214733	0.0239281	0.00170091	0.00691555	0	0.455029	0.00813275	0.00305374	0.0204325	1.47e-05	6.78e-05	0.00437717	0.00433874	0.000391041	0.0367578
2	9	A	Serum	Free flow	clot activator	6h,RT	stored immediately	until analysis	-80C	sample	none	124	124-B		0.00297573	0.0515066	0.00256418	0.00157473	0.0370001	0.015544	0.00378527	0.005758	0.0412523	0.00474391	0.00390973	0.00509386	0.0106042	0.00504826	0.0189806	0.00233006	0.00110897	0.00146137	0.141816	0.0012211	0.000166345	0.0267138	0.00227338	0.00812996	0.000166345	0.504964	0.00910832	0.00276872	0.025659	0.000108432	0.000897031	0.00646528	0.00484249	0.00059761	0.0391909
2	9	A	Serum	Free flow	clot activator	6h,RT	stored immediately	until analysis	-80C	sample	none	124	124-C		0.002837	0.030205	0.00271191	0.000617935	0.0248688	0.0117695	0.00533625	0.00461575	0.0317311	0.00400282	0.00359253	0.0062519	0.00684982	0.00638449	0.0158537	0.00193886	0.00117208	0.001421	0.149275	0.00140224	0	0.0265887	0.00224658	0.00924276	0.000166367	0.55252	0.0105086	0.0034737	0.0267813	0.000699242	0.000394027	0.00522868	0.00587664	0.000414041	0.0355375
3	9	B	Serum	Free flow	clot activator	2h,RT	stored immediately	until analysis	-80C	sample	none	125	125-A		0.00116125	0.0293365	0.00111804	0.000380783	0.0261511	0.0118772	0.00221178	0.00418456	0.0373626	0.00356612	0.00272759	0.0027735	0.00679873	0.00233466	0.0186665	0.00202949	0.000796673	0.00096816	0.129542	0.0011383	0.00013773	0.0268195	0.00105188	0.0089997	0.000113425	0.54179	0.0103365	0.0039064	0.0312026	0.000464501	3.78e-05	0.00820033	0.00721057	0.000683248	0.0589875
3	9	B	Serum	Free flow	clot activator	2h,RT	stored immediately	until analysis	-80C	sample	none	125	125-B		0.0023389	0.0478024	0.00171206	0.000633714	0.036917	0.0158978	0.00229649	0.00634974	0.0429699	0.00396042	0.00356507	0.0035433	0.00941173	0.00294625	0.0209011	0.00187135	0.000566102	0.00115512	0.140781	0.00106116	0.000146682	0.0279877	0.00113793	0.00880782	0.000137515	0.515815	0.009351	0.00262539	0.0271443	0.0002693	0.00056381	0.0066179	0.00521295	0.000571832	0.0378314
3	9	B	Serum	Free flow	clot activator	2h,RT	stored immediately	until analysis	-80C	sample	none	125	125-C		0.00168186	0.0482848	0.00239124	0.000489162	0.0369776	0.0183563	0.00209112	0.00555618	0.0526951	0.00448237	0.00460319	0.00288625	0.00972283	0.00298759	0.0253858	0.00216323	0.00109526	0.000912064	0.152743	0.00133691	0.000189039	0.0289327	0.000463827	0.00878933	0.000401464	0.480186	0.00782465	0.00250623	0.0231271	0.00035664	0.000674304	0.00511379	0.00539053	0.000333254	0.0469518
4	9	C	Serum	Free flow	clot activator	2h,4C	stored immediately	until analysis	-80C	sample	none	126	126-A		0.00375845	0.0411018	0.00320208	0.00132434	0.0355366	0.010099	0.00345659	0.00599429	0.028912	0.00528107	0.00438881	0.00623844	0.0111747	0.00655954	0.0167192	0.00307779	0.00146491	0.00160844	0.140686	0.00216925	0.000264867	0.0297495	0.00260428	0.0113331	0	0.476048	0.0157263	0.00389459	0.0345511	0.000864148	0.000979565	0.0144567	0.0081517	0.00130214	0.0524156
4	9	C	Serum	Free flow	clot activator	2h,4C	stored immediately	until analysis	-80C	sample	none	126	126-B		0.00234516	0.0267338	0.00360087	0.00119671	0.0252375	0.0126276	0.00731819	0.00441604	0.0362998	0.00636204	0.00509868	0.00613756	0.00748138	0.00894854	0.0203066	0.00370123	0.0014572	0.00120591	0.156479	0.00294275	0.000494162	0.0350893	0.0025819	0.0137477	0.000239802	0.469815	0.0177032	0.00448729	0.0346059	0.000567711	0.00101207	0.0117718	0.00871487	0.00102663	0.0450668
4	9	C	Serum	Free flow	clot activator	2h,4C	stored immediately	until analysis	-80C	sample	none	126	126-C		0.00567008	0.0549272	0.00533715	0.00219692	0.0468526	0.021365	0.00920694	0.0076841	0.0528546	0.00779404	0.00499291	0.0103249	0.0121684	0.0102612	0.0256294	0.00387904	0.0011745	0.00129884	0.166615	0.0029419	4.32e-05	0.0320517	0.00318235	0.0101893	3.49e-05	0.402148	0.0109312	0.0028114	0.0252852	3.8e-05	0.000913501	0.00681889	0.00546765	0.00047165	0.0352186
5	9	D	Serum	Free flow	clot activator	0.5h,RT	6h,RT	until analysis	-80C	sample	none	131	131-A		0.00587214	0.0559366	0.0050278	0.00121488	0.0486417	0.0142561	0.00798367	0.00678153	0.034998	0.00534602	0.00316377	0.00665283	0.0105563	0.00624268	0.0162064	0.00250895	0.000603902	0.0010989	0.144184	0.00143833	3.11e-05	0.0268913	0.00206062	0.00797943	0.000362059	0.475181	0.0117004	0.00458372	0.0259183	0.00100132	0.000534602	0.00804449	0.00539128	0.000661888	0.0402705
5	9	D	Serum	Free flow	clot activator	0.5h,RT	6h,RT	until analysis	-80C	sample	none	131	131-B		0.00585687	0.048308	0.0050056	0.00155925	0.0424259	0.0128583	0.00873853	0.00667273	0.0313476	0.00657665	0.00438191	0.00941785	0.0100997	0.00784596	0.0154408	0.00228493	0.000746753	0.00137467	0.151315	0.00223183	0.000153396	0.0280993	0.00345647	0.00993957	0.000422261	0.459952	0.0132553	0.00392003	0.0308546	0.000560486	0.000559643	0.010082	0.00747259	0.00088245	0.0436909
5	9	D	Serum	Free flow	clot activator	0.5h,RT	6h,RT	until analysis	-80C	sample	none	131	131-C		0.00497742	0.049698	0.00460911	0.00173701	0.0383509	0.0112199	0.00632352	0.0055624	0.0305211	0.00551624	0.00376415	0.00676531	0.0077054	0.00551906	0.0150802	0.0024143	0.000568956	0.000467222	0.142671	0.0015618	0.000600984	0.0263877	0.00362191	0.0100933	9.51e-05	0.489422	0.0132461	0.00474193	0.0275218	0.000828001	0.000502076	0.00898179	0.00689341	0.0007988	0.0473609
6	9	E	Serum	Free flow	gel	0.5h,RT	6h,RT	until analysis	-80C	sample	none	132	132-A		0.0045236	0.03373	0.00382878	0.00121448	0.0264904	0.0123534	0.00616181	0.00395234	0.0359177	0.00562107	0.00362673	0.00725419	0.00617634	0.00619233	0.0205045	0.00269134	0.000873613	0.000885969	0.149322	0.00161858	0.000548007	0.0291577	0.00333674	0.00992808	0.000104659	0.476935	0.0132147	0.00518063	0.0286541	0.000686826	0.00133877	0.0100575	0.00825354	0.00105095	0.057604
6	9	E	Serum	Free flow	gel	0.5h,RT	6h,RT	until analysis	-80C	sample	none	132	132-B		0.00524266	0.0415349	0.00557156	0.0015135	0.0345339	0.0152773	0.00745831	0.00493757	0.0414661	0.00675947	0.00416527	0.010664	0.0080837	0.00767339	0.0224093	0.00293171	0.00122893	0.000910615	0.153859	0.00238904	0	0.0303686	0.00481845	0.00963426	9.93e-05	0.440147	0.0119101	0.00449815	0.0271563	0.000659137	0.000976794	0.00944234	0.00758008	0.00102709	0.0542782
6	9	E	Serum	Free flow	gel	0.5h,RT	6h,RT	until analysis	-80C	sample	none	132	132-C		0.00690985	0.0521908	0.00574876	0.00201846	0.0375559	0.0163119	0.00539128	0.00565285	0.0397008	0.0062007	0.00422002	0.0088978	0.00845894	0.0050585	0.0200378	0.00265495	0.000854467	0.00117126	0.161558	0.00128897	0.000139505	0.0263025	0.00379279	0.00849381	0.000421421	0.487151	0.00989613	0.00265641	0.0229486	0.000527503	0.00011916	0.00565721	0.00430721	0.000518784	0.028443
7	9	F	Serum	Free flow	clot activator	0.5h,RT	stored immediately	2 M	-80C	sample	none	130	130-A		0.015287	0.11412	0.0129588	0.00436255	0.0931596	0.0303265	0.0103528	0.0146572	0.0720474	0.0121227	0.00907202	0.00635648	0.0200992	0.00905687	0.0353509	0.00515743	0.00219517	0.00188362	0.119361	0.00331844	0	0.0303712	0.00141377	0.0109548	3.96e-05	0.276592	0.0154184	0.00437098	0.021662	0.00055995	0.00112579	0.00820473	0.00448044	0.000740144	0.0245056
7	9	F	Serum	Free flow	clot activator	0.5h,RT	stored immediately	2 M	-80C	sample	none	130	130-B		0.00375667	0.0316378	0.00715824	0.0019567	0.0249069	0.0103529	0.00794557	0.00329504	0.0273436	0.0031028	0.00308566	0.00424033	0.00455012	0.00944188	0.0110582	0.00276852	0.000195915	0.000997942	0.115052	0.00100774	0.000373463	0.02356	0.00168977	0.0097786	2.69e-05	0.509004	0.015383	0.00472155	0.0359271	0.000880393	0.000798353	0.0152642	0.00854679	0.000839985	0.0752473
7	9	F	Serum	Free flow	clot activator	0.5h,RT	stored immediately	2 M	-80C	sample	none	130	130-C		0.00748496	0.0483796	0.00482183	0.00227163	0.0319544	0.011442	0.0066772	0.00482613	0.0315091	0.00460994	0.00367203	0.00366235	0.00728813	0.00631903	0.0129102	0.00244694	0.0010261	0.00118099	0.116078	0.00109171	0.00042593	0.0223893	0.00138105	0.00982327	3.33e-05	0.501942	0.0129102	0.00400331	0.0331246	0.00036247	0.00100352	0.0130801	0.00742473	0.000553924	0.0642777
8	9	F	Serum	Free flow	clot activator	0.5h,RT	stored immediately	2 M	-20C	sample	none	129	129-A		0.00684919	0.0601665	0.00683214	0.00253354	0.0407349	0.01612	0.00675433	0.00658806	0.0402862	0.00609776	0.00462262	0.00475265	0.00866008	0.00592829	0.0181643	0.00337343	0.000714124	0.000966731	0.112165	0.00198995	0.000168405	0.0262403	0.000782338	0.0107065	0	0.437658	0.015716	0.00495303	0.0340008	0.000810051	0.00097739	0.0145372	0.00947546	0.00139414	0.0638927
8	9	F	Serum	Free flow	clot activator	0.5h,RT	stored immediately	2 M	-20C	sample	none	129	129-B		0.00686939	0.0497275	0.00621404	0.00199558	0.0350712	0.0125576	0.00889528	0.00508215	0.0288246	0.00468212	0.00364418	0.00509882	0.00683832	0.00830509	0.0116038	0.00201756	0.000559127	0.000266684	0.110504	0.00145085	0.000100007	0.02335	0.0021312	0.00957184	0.000130312	0.459793	0.014585	0.0051314	0.0364531	0.00110386	0.000953092	0.016098	0.0103173	0.00135085	0.080328
8	9	F	Serum	Free flow	clot activator	0.5h,RT	stored immediately	2 M	-20C	sample	none	129	129-C		0.00565742	0.0436959	0.0067336	0.00174613	0.0366354	0.0131224	0.00698621	0.00618996	0.0338395	0.00499771	0.00430302	0.00439604	0.0100065	0.00740355	0.0148011	0.00376023	0.00130063	0.000372097	0.109153	0.00189889	0.000116921	0.0326823	0.00161299	0.0102463	0.000309797	0.471187	0.022453	0.00597575	0.0371244	0.00113592	0.00124943	0.0139135	0.00907542	0.00138	0.0494949
9	9	F	Serum	Free flow	clot activator	0.5h,RT	24h,4C	until analysis	-80C	sample	none	127	127-A		0.00283948	0.0358522	0.00246958	0.000918179	0.0314065	0.0148183	0.00477159	0.00603959	0.0435119	0.00523493	0.00469592	0.00525424	0.00910765	0.00854393	0.0213668	0.00252055	0.00114212	0.000965285	0.156666	0.00152669	2.24e-05	0.0314119	0.00178693	0.0115649	0	0.487194	0.0110544	0.0037955	0.0276512	0.000449436	0.000379164	0.00677475	0.0062118	0.000605426	0.0414215
9	9	F	Serum	Free flow	clot activator	0.5h,RT	24h,4C	until analysis	-80C	sample	none	127	127-B		0.00386567	0.0426621	0.00315692	0.000797342	0.0298423	0.0145518	0.00431238	0.00385444	0.0375387	0.00499493	0.0028874	0.00463182	0.00515714	0.0063388	0.0183389	0.00151358	0.000550278	0.000897165	0.135902	0.00121411	0.000303214	0.0235609	0.00145743	0.00833403	0.000167205	0.490268	0.00985385	0.00523575	0.0282925	0.00043049	0.000616411	0.0083203	0.00872085	0.000510349	0.0680298
9	9	F	Serum	Free flow	clot activator	0.5h,RT	24h,4C	until analysis	-80C	sample	none	127	127-C		0.00423326	0.0656953	0.00411208	0.00140007	0.0503386	0.0176766	0.00405811	0.00727684	0.047924	0.00564875	0.0039832	0.00734183	0.0092387	0.00587677	0.0213701	0.00196737	0.000620172	0.00095284	0.140632	0.00117095	5.07e-05	0.0242583	0.00250492	0.00785625	1.98e-05	0.459825	0.00795429	0.00332448	0.0248157	0.000236833	0.000214802	0.00651897	0.00551546	0.000484682	0.0427721
10	9	F	Serum	Free flow	clot activator	0.5h,RT	48h,4C	until analysis	-80C	sample	none	128	128-A		0.0102884	0.0400327	0.0093104	0.0030114	0.0306676	0.0161094	0.0143748	0.00481383	0.04319	0.0056716	0.00475252	0.00931218	0.00707283	0.0125176	0.0194553	0.00374833	0.00124825	0.00065121	0.137018	0.00156731	0.000310128	0.0262097	0.00405191	0.00977886	0.000298223	0.462337	0.0131165	0.00469835	0.0266728	0.000908956	0.000471443	0.00847763	0.0063484	0.000648829	0.0476675
10	9	F	Serum	Free flow	clot activator	0.5h,RT	48h,4C	until analysis	-80C	sample	none	128	128-B		0.00782191	0.0607605	0.00764011	0.00230044	0.0494396	0.0200005	0.0113558	0.00835883	0.0487023	0.00610173	0.0051917	0.010033	0.0127256	0.0084677	0.0230049	0.00292086	0.000773154	0.000876206	0.13917	0.00131167	3.17e-06	0.0267983	0.00364698	0.00883816	0	0.441856	0.0100906	0.0044492	0.0249671	7.19e-05	0.000685427	0.00691452	0.00432871	0.000505219	0.0324783
10	9	F	Serum	Free flow	clot activator	0.5h,RT	48h,4C	until analysis	-80C	sample	none	128	128-C		0.00855967	0.071537	0.0092353	0.00291908	0.0607946	0.0257958	0.0109595	0.0101095	0.0620661	0.00700505	0.00619895	0.00939324	0.0137713	0.00851266	0.0283852	0.00385407	0.00137027	0.000997325	0.127212	0.00183301	0.00025884	0.0254059	0.00322123	0.00919832	0.000573673	0.386184	0.0118844	0.00351705	0.0235306	0.000961933	0.000718412	0.00762415	0.00531467	0.000604312	0.039191
11	9	H	Plasma	Free flow	citrate	0.5h,RT	stored immediately	until analysis	-80C	reference	none	122	122-A		0.00731872	0.0552616	0.00752748	0.00225662	0.0484021	0.0201008	0.00897554	0.0076232	0.063065	0.0061731	0.00517616	0.0109409	0.0115489	0.00877289	0.0299195	0.00353462	0.00104684	0.000994906	0.173059	0.00221283	7.03e-05	0.0270448	0.00433604	0.00821078	4.58e-05	0.405963	0.00925864	0.00293991	0.0198523	4.79e-05	0.000412423	0.00511099	0.00327291	0.000503054	0.0304429
11	9	H	Plasma	Free flow	citrate	0.5h,RT	stored immediately	until analysis	-80C	reference	none	122	122-B		0.00498346	0.0442978	0.00539182	0.00151324	0.0368282	0.0169029	0.00707581	0.00629054	0.0500311	0.00490088	0.00457453	0.00961753	0.0100972	0.00773862	0.0246533	0.003714	0.0013436	0.00108746	0.154617	0.00201035	0.000140426	0.0302686	0.00574344	0.010805	6.29e-05	0.445463	0.0128299	0.0037404	0.0270506	0.000676856	0.000513961	0.00822394	0.00505648	0.000687528	0.0390532
11	9	H	Plasma	Free flow	citrate	0.5h,RT	stored immediately	until analysis	-80C	reference	none	122	122-C		0.00573773	0.0375218	0.00556202	0.00158047	0.0321982	0.0150942	0.00705415	0.00552308	0.0404567	0.00413922	0.00360828	0.00868211	0.00786338	0.00690598	0.0191764	0.00310584	0.000442606	0.000618319	0.147985	0.0016517	0.000146269	0.0247888	0.00509187	0.0100403	0.000304885	0.481826	0.0107869	0.00301846	0.0268964	0.000772186	0.000433108	0.00803529	0.00456473	0.000637315	0.0508892
12	9	G	Plasma	Vacuum	citrate	0.5h,RT	stored immediately	until analysis	-80C	sample	none	121	121-A		0.00856806	0.0360355	0.00898958	0.00256266	0.0310784	0.0159459	0.013042	0.00453044	0.0407619	0.00580982	0.00488924	0.0153659	0.00697194	0.0150772	0.0198308	0.00430993	0.00126419	0.000882791	0.15879	0.00277421	0	0.0305385	0.00829262	0.012989	0.000144145	0.439234	0.0143989	0.00414281	0.0320259	0.00105343	0.00126965	0.00919139	0.00531622	0.000770981	0.0341483
12	9	G	Plasma	Vacuum	citrate	0.5h,RT	stored immediately	until analysis	-80C	sample	none	121	121-B		0.0083561	0.036809	0.00933987	0.0028892	0.0345476	0.0155516	0.0141416	0.0050184	0.0391511	0.00665027	0.00469174	0.0147162	0.00696413	0.0132474	0.0184621	0.00303475	0.00103876	0.000884206	0.149134	0.0015764	8.96e-05	0.0249171	0.00736522	0.00946551	2.94e-05	0.418206	0.0127691	0.00558638	0.0288645	0.00110229	0.000674652	0.0119261	0.00710921	0.000899377	0.0627838
12	9	G	Plasma	Vacuum	citrate	0.5h,RT	stored immediately	until analysis	-80C	sample	none	121	121-C		0.00745632	0.0528538	0.00875541	0.00210355	0.0470636	0.0146317	0.0117964	0.00627429	0.0384477	0.0066942	0.00476997	0.0136474	0.00954991	0.0136624	0.0186067	0.00297924	0.00113919	0.000999224	0.162214	0.00197255	5.88e-05	0.0268595	0.00634801	0.0101755	0.000139971	0.415723	0.0130093	0.00457322	0.0267066	0.000760127	0.000649047	0.00856912	0.00504643	0.00064556	0.0410813
13	9	I	Plasma	Free flow	EDTA	0.5h,RT	stored immediately	until analysis	-80C	sample	none	134	134-A		0.00310699	0.0421835	0.00332475	0.000742722	0.0430779	0.0158538	0.00417247	0.00644341	0.0438167	0.00240315	0.00330531	0.00330142	0.00930931	0.00401692	0.0174054	0.0024226	0.000824383	0.000839937	0.152204	0.00220872	0.000171098	0.0211734	0.000579401	0.00729501	0.000225539	0.524203	0.00840326	0.00127935	0.023351	0.000797163	0.000754388	0.00504351	0.00194041	0	0.0352346
13	9	I	Plasma	Free flow	EDTA	0.5h,RT	stored immediately	until analysis	-80C	sample	none	134	134-B		0.00839992	0.0465094	0.00606396	0.00216434	0.0415991	0.016285	0.00699834	0.0045289	0.0364982	0.00208806	0.00405217	0.00582559	0.00537747	0.00599722	0.0133007	0.00112507	0	0.000533933	0.136963	0.000562537	0.000381381	0.0170859	0.000924849	0.00494842	0.00029557	0.556931	0.00860014	0.000162087	0.0190786	0.0016304	0.00050533	0.00394729	0.000619744	0.000371846	0.0288705
13	9	I	Plasma	Free flow	EDTA	0.5h,RT	stored immediately	until analysis	-80C	sample	none	134	134-C		0.00431589	0.0326204	0.00454304	0.00195489	0.0325998	0.0149026	0.00868685	0.00432278	0.0317876	0.0032765	0.00248491	0.00496982	0.00608493	0.00682145	0.0132781	0.00216139	0.00100498	0.00102563	0.160204	0	0.000123901	0.018124	0.00112888	0.00556867	0.000357937	0.571247	0.00905167	0.00251933	0.0166716	0.000316636	0	0.00315948	0.00122525	0.000419888	0.0255856
14	9	J	Plasma	Free flow	Li heparin	0.5h,RT	stored immediately	until analysis	-80C	sample	none	133	133-A		0.00728479	0.0473927	0.00569711	0.00212626	0.0367827	0.0194816	0.0100028	0.00579767	0.0508669	0.00606357	0.00581991	0.00491487	0.0081995	0.0109717	0.023356	0.00383095	0.00152484	0.0010027	0.158807	0.00297232	0	0.0315787	0.00126764	0.012423	1.74e-05	0.414872	0.0139933	0.00392861	0.0302444	0.00043995	0.00121929	0.00942266	0.00613802	0.000785141	0.043906
14	9	J	Plasma	Free flow	Li heparin	0.5h,RT	stored immediately	until analysis	-80C	sample	none	133	133-B		0.00197178	0.0352877	0.00239471	0.000994295	0.0285909	0.0130519	0.00188776	0.00356546	0.0353409	0.00211463	0.00341421	0.00250954	0.00549523	0.00247593	0.015004	0.0016861	0.000938278	0.000845851	0.121088	0.00138641	0.000221266	0.0238239	0.00074222	0.00826525	0.000501349	0.524063	0.0137213	0.0030305	0.0303134	0.000425726	0.0013612	0.0124133	0.00406961	0.000845851	0.0737879
14	9	J	Plasma	Free flow	Li heparin	0.5h,RT	stored immediately	until analysis	-80C	sample	none	133	133-C		0.00507194	0.037914	0.00434962	0.00156503	0.024538	0.0109421	0.00733574	0.00397276	0.0281888	0.00277936	0.00292854	0.00339438	0.00397799	0.0070086	0.0124077	0.00159643	0.000915986	0.000881963	0.145838	0.00167233	0.00080345	0.0204265	0.000777279	0.00717086	0	0.519668	0.0106071	0.00374769	0.0278748	0.000583614	0.000868878	0.00963617	0.00537814	0.00102067	0.0637552
15	9	K	Plasma	Free flow	citrate	hemolysis	stored immediately	until analysis	-80C	sample	hemolysis	135	135-A	438	0.00355464	0.0281142	0.00404846	0.0010746	0.0244568	0.0101883	0.00431969	0.00349017	0.0295166	0.0026491	0.00278046	0.00935031	0.00654552	0.00583702	0.0144843	0.00228604	0.000576526	0.000927429	0.125125	0.00150517	0.000158727	0.0267312	0.00752586	0.0105934	0.000100953	0.501926	0.014972	0.00387756	0.0352672	0.000903103	0.000555849	0.0144113	0.00569776	0.000659843	0.0698339
15	9	K	Plasma	Free flow	citrate	hemolysis	stored immediately	until analysis	-80C	sample	hemolysis	135	135-B	438	0.00525229	0.0402455	0.00551104	0.00184851	0.0375056	0.012835	0.00745972	0.00584491	0.035494	0.00380887	0.0036642	0.0131588	0.00953359	0.008054	0.017488	0.00290131	0.000745638	0.000868612	0.145826	0.00150407	0.000338319	0.0272592	0.00825989	0.00990585	0.000222022	0.470293	0.012396	0.00309996	0.0289975	0.000437367	0.00059818	0.0099359	0.00383225	0.000767339	0.0486228
15	9	K	Plasma	Free flow	citrate	hemolysis	stored immediately	until analysis	-80C	sample	hemolysis	135	135-C	438	0.00863502	0.0508957	0.00760226	0.00208465	0.0384954	0.0122628	0.00882747	0.00453865	0.0310665	0.00369355	0.00321423	0.0134103	0.00679661	0.00777439	0.0143666	0.00224841	0.000614397	0.00109133	0.14237	0.00124672	0.000334691	0.0221685	0.00574832	0.00801943	0.000328714	0.477129	0.0115552	0.00327399	0.0266605	0.00066221	0.00090247	0.00852386	0.00405334	0.000597662	0.0520074
16	9	K	Plasma	Free flow	citrate	hemolysis	stored immediately	until analysis	-80C	sample	hemolysis	154	154-A	377	0.00588842	0.0296919	0.0056217	0.00135157	0.0238226	0.00919043	0.00774341	0.00381744	0.0270717	0.00397997	0.00306038	0.0121352	0.00668147	0.0104574	0.0119563	0.00313674	0.000623422	0.00118903	0.145338	0.00147701	3.71e-05	0.0286959	0.00773632	0.0118516	0.000203444	0.524776	0.0139034	0.00386761	0.0326803	0.00101067	0.00128011	0.00882281	0.00450685	0.000497428	0.036207
16	9	K	Plasma	Free flow	citrate	hemolysis	stored immediately	until analysis	-80C	sample	hemolysis	154	154-B	377	0.00593424	0.0532743	0.00647709	0.00232584	0.0458732	0.0154338	0.00818916	0.00857558	0.0410054	0.00529992	0.00494398	0.0142553	0.0148691	0.00999336	0.0210061	0.0036601	0.00127195	0.00128786	0.147093	0.00177172	0	0.0294578	0.00657121	0.0104872	0.000182939	0.42263	0.013043	0.00345264	0.0277788	0.000769536	0.00128322	0.00980247	0.00434811	0.00068602	0.0419738
16	9	K	Plasma	Free flow	citrate	hemolysis	stored immediately	until analysis	-80C	sample	hemolysis	154	154-C	377	0.0090144	0.0615133	0.00943187	0.00249298	0.0451069	0.0176774	0.0135673	0.00547326	0.0453097	0.00695301	0.00494213	0.0139439	0.00829904	0.0108975	0.0210759	0.00285475	0.000698272	0.00104889	0.15788	0.00144854	5.2e-06	0.0238051	0.00427432	0.00801304	0.000235481	0.431036	0.00968296	0.00270098	0.0226099	0.00045462	0.000476905	0.00661724	0.00314445	0.000277823	0.036975
1	10	F	Serum	Free flow	clot activator	0.5h,RT	stored immediately	until analysis	-80C	reference	none	138	138-A		0.00641758	0.0360502	0.00858323	0.00279789	0.0350263	0.033275	0.0101061	0.00486108	0.0804572	0.00665532	0.00391899	0.00738274	0.00772499	0.00998096	0.0322786	0.00361401	0.000859052	0.000601053	0.111553	0.00109113	0.000159579	0.0213216	0.00434103	0.00392385	3.24e-05	0.490283	0.00729283	0.00272458	0.0210871	0.000350749	0.000200486	0.00304131	0.0033548	0.000500607	0.0320502
1	10	F	Serum	Free flow	clot activator	0.5h,RT	stored immediately	until analysis	-80C	reference	none	138	138-B		0.00635593	0.0319318	0.00879429	0.00211096	0.0341071	0.0291639	0.0114266	0.00448845	0.0757998	0.00625201	0.00350754	0.00570068	0.00672551	0.00876125	0.03053	0.00340841	0.000809165	0.000616113	0.108127	0.00130832	0	0.0214561	0.00360276	0.00428149	0.000271316	0.501015	0.00703769	0.00341015	0.0225701	0.0004048	0.000646115	0.00384756	0.00445932	0.000529153	0.0375434
1	10	F	Serum	Free flow	clot activator	0.5h,RT	stored immediately	until analysis	-80C	reference	none	138	138-C		0.00726478	0.0354902	0.0105094	0.00267	0.0348777	0.0337273	0.0129751	0.00490976	0.0817116	0.00634198	0.00370051	0.00782661	0.00740451	0.00855379	0.0320744	0.0037861	0.000705635	0.000425594	0.111628	0.00141069	0	0.0206759	0.00528761	0.00419655	0.000175244	0.483945	0.00642757	0.00275501	0.0199703	0.000305077	0.000731835	0.00316604	0.00357883	0.000334769	0.033244
2	10	A	Serum	Free flow	clot activator	6h,RT	stored immediately	until analysis	-80C	sample	none	139	139-A		0.0040584	0.0347136	0.00553229	0.0014693	0.0298896	0.0242032	0.00318463	0.00314324	0.0650194	0.0047942	0.00240744	0.00278914	0.00437111	0.00418256	0.0250241	0.00167394	0.000802481	0.000480569	0.100779	0.000740398	5.06e-05	0.0150333	0.00247873	0.00289721	0	0.561691	0.00395952	0.00150149	0.0168038	0.000160956	0.000473671	0.00273625	0.00394343	0.000531155	0.0551022
2	10	A	Serum	Free flow	clot activator	6h,RT	stored immediately	until analysis	-80C	sample	none	139	139-B		0.00501704	0.0500535	0.00510268	0.00210332	0.0473632	0.0322975	0.00431524	0.00479773	0.0762457	0.00505464	0.00231845	0.00306412	0.0067799	0.00431524	0.0285692	0.00233934	0.000919025	0.00067256	0.108742	0.000361344	0	0.0169978	0.00214718	0.00252523	1.46e-05	0.508125	0.00496483	0.00185685	0.0166385	0.000375965	0.00031957	0.0018297	0.00352572	0.000538883	0.0408883
2	10	A	Serum	Free flow	clot activator	6h,RT	stored immediately	until analysis	-80C	sample	none	139	139-C		0.00411783	0.0354794	0.00473294	0.00216388	0.0299097	0.0287397	0.00437767	0.00366421	0.0684558	0.00413838	0.00306378	0.0035497	0.00623033	0.00472266	0.0275975	0.00177338	0.000587213	0.000829438	0.113201	0.000516747	0	0.0183196	0.00278192	0.00311223	0.000174696	0.53577	0.00531721	0.00206992	0.0186528	6.02e-05	0.000248097	0.00255438	0.00408847	0.00026131	0.0481617
3	10	B	Serum	Free flow	clot activator	2h,RT	stored immediately	until analysis	-80C	sample	none	140	140-A		0.00219766	0.0274316	0.00313026	0.00104553	0.0269325	0.0275564	0.00360722	0.00352904	0.0717203	0.00465274	0.00261144	0.00294705	0.00624235	0.00485095	0.0283437	0.00241166	0.000499862	0.000274806	0.112481	0.000898646	4.66e-05	0.0199621	0.00191416	0.00326924	7.19e-05	0.521265	0.00639555	0.0014759	0.0222877	4.58e-05	0.000825996	0.00435977	0.00564615	0.000650689	0.0598752
3	10	B	Serum	Free flow	clot activator	2h,RT	stored immediately	until analysis	-80C	sample	none	140	140-B		0.00387907	0.0432135	0.00413137	0.00227698	0.0432475	0.0305267	0.00379833	0.00602738	0.082761	0.00583059	0.00312092	0.00437736	0.00894898	0.00457919	0.0344524	0.00196666	0.00053487	0.00076446	0.127025	0.000758153	0	0.0206732	0.00244854	0.00237159	6.18e-05	0.500628	0.00240818	0.00189097	0.0145929	9.59e-05	0.000340601	0.00161344	0.00275382	0.000295188	0.0304397
3	10	B	Serum	Free flow	clot activator	2h,RT	stored immediately	until analysis	-80C	sample	none	140	140-C		0.00355626	0.0438306	0.00392438	0.001657	0.0368979	0.0271839	0.00465021	0.00417232	0.0698572	0.00539969	0.00235728	0.00338498	0.00742576	0.00538171	0.0286829	0.00212732	0.000615107	0.000543187	0.116164	0.000574415	0.000265915	0.0216063	0.0019409	0.00361588	0	0.522456	0.00501643	0.0016589	0.0194241	9.27e-05	0.000202512	0.00250206	0.00442972	0.000374742	0.0387129
4	10	C	Serum	Free flow	clot activator	2h,4C	stored immediately	until analysis	-80C	sample	none	141	141-A		0.00223348	0.0288367	0.00298179	0.00176387	0.0285064	0.0260706	0.00379691	0.00343994	0.0722558	0.00419016	0.00220102	0.00259045	0.00665462	0.00261909	0.0288424	0.00168752	0.000356974	0.000713949	0.106037	0.000635682	7.25e-05	0.0177227	0.00187268	0.00286343	0	0.557102	0.00460631	0.0014489	0.0186638	0.000297797	0.000154625	0.00182878	0.00406607	0.000295888	0.0488368
4	10	C	Serum	Free flow	clot activator	2h,4C	stored immediately	until analysis	-80C	sample	none	141	141-B		0.0030008	0.0299576	0.00257982	0.0016875	0.0284716	0.0201133	0.00272375	0.00295402	0.0534279	0.00359808	0.00227399	0.00141045	0.00357289	0.00328505	0.0189223	0.00118737	0.000424573	0.000726812	0.102549	0.00071242	0	0.0137087	0.00097508	0.00320229	0	0.59966	0.00450839	0.00148241	0.0174399	0.000946295	0.000503731	0.00144283	0.00411261	0.0003742	0.055871
4	10	C	Serum	Free flow	clot activator	2h,4C	stored immediately	until analysis	-80C	sample	none	141	141-C		0.00365523	0.0323249	0.00345553	0.00163913	0.0320074	0.0240384	0.00559055	0.00446751	0.0637859	0.00574201	0.00210137	0.00285754	0.00674838	0.00529885	0.0265122	0.0017603	0.000529549	0.000259165	0.109067	0.000795445	0	0.0192489	0.00106919	0.00295066	6.73e-05	0.52487	0.00670014	0.00306398	0.0213469	0.000336578	0.000420722	0.00326256	0.00635571	0.000394918	0.0593218
5	10	D	Serum	Free flow	clot activator	0.5h,RT	6h,RT	until analysis	-80C	sample	none	146	146-A		0.00684191	0.037752	0.00718647	0.00241036	0.0338573	0.0272353	0.00540523	0.00409161	0.0674254	0.00569749	0.00298718	0.00602359	0.00604974	0.00629585	0.024422	0.00327329	0.000466074	7.54e-05	0.118423	0.00171048	0.000275338	0.0198535	0.00313331	0.00343018	0	0.528767	0.00602666	0.00258417	0.0195397	0.00018766	0.000787558	0.00230884	0.00473458	0.00026457	0.0319269
5	10	D	Serum	Free flow	clot activator	0.5h,RT	6h,RT	until analysis	-80C	sample	none	146	146-B		0.00299743	0.0314978	0.00331349	0.00110619	0.0318983	0.0216607	0.00568318	0.00448595	0.0576022	0.00527755	0.00335937	0.0045697	0.0068134	0.00529066	0.0234631	0.00278843	0.000610264	0.000412911	0.119133	0.00106396	0.000262166	0.0212529	0.00267701	0.00380213	6.48e-05	0.522981	0.00792761	0.00280809	0.0234223	0.000251242	0.000622644	0.00492872	0.00620824	0.00107415	0.05294
5	10	D	Serum	Free flow	clot activator	0.5h,RT	6h,RT	until analysis	-80C	sample	none	146	146-C		0.00474717	0.024403	0.00560012	0.00143882	0.0261047	0.0267095	0.00573207	0.00410746	0.0738223	0.00664308	0.00410218	0.00681831	0.00714767	0.00680987	0.0331204	0.00455188	0.000899396	0.000405362	0.131588	0.00231816	9.08e-05	0.0267423	0.00503535	0.00469438	0.000337801	0.482367	0.00983319	0.00294204	0.023265	0.000245962	0.000915231	0.00489179	0.0059263	0.000831836	0.0423519
6	10	E	Serum	Free flow	gel	0.5h,RT	6h,RT	until analysis	-80C	sample	none	147	147-A		0.00428137	0.0431315	0.00489513	0.00164395	0.0405859	0.0289199	0.00352536	0.00511769	0.0730334	0.00569473	0.00272806	0.00439151	0.00764957	0.00434676	0.0295038	0.00191583	0.000503623	0.000963653	0.111503	0.000801897	0.000138812	0.0173205	0.00199843	0.00267528	0.000458882	0.494052	0.00545841	0.00211545	0.0179239	0	0.000548364	0.00314105	0.00477352	0.000276477	0.0560204
6	10	E	Serum	Free flow	gel	0.5h,RT	6h,RT	until analysis	-80C	sample	none	147	147-B		0.0025268	0.0321366	0.00302658	0.00119405	0.033954	0.0266677	0.00293252	0.00505838	0.0742265	0.00494599	0.00293969	0.00374715	0.010375	0.00428041	0.0327336	0.00287274	0.0011542	0.000765213	0.119076	0.00102666	1.36e-05	0.0238165	0.00297955	0.00449483	7.97e-07	0.504993	0.00644931	0.00159579	0.0226288	0.000360288	0.000820213	0.00366107	0.0051357	0.000684707	0.0437455
6	10	E	Serum	Free flow	gel	0.5h,RT	6h,RT	until analysis	-80C	sample	none	147	147-C		0.00574805	0.0368552	0.00585692	0.00207549	0.0390771	0.0347873	0.00841162	0.00483413	0.0829086	0.00814173	0.00391944	0.00630085	0.00888391	0.00812103	0.0356399	0.00296258	0.000967593	0.000736045	0.150435	0.0016492	0.000124208	0.0245463	0.00336204	0.00384047	0.000337354	0.457671	0.00538616	0.00243662	0.0154769	0.000104273	0	0.00215063	0.00340651	0.000191678	0.0261626
7	10	F	Serum	Free flow	clot activator	0.5h,RT	stored immediately	2 M	-80C	sample	none	145	145-A		0.00591549	0.0332212	0.00439118	0.00224487	0.0362506	0.0196151	0.00970771	0.00488649	0.0486652	0.00468683	0.00342106	0.00312413	0.00837538	0.0083741	0.0181842	0.00349785	0.000753835	0.000907418	0.0964397	0.000308445	0	0.0179909	0.00116851	0.00306398	6.53e-05	0.541615	0.00703665	0.00414545	0.0259273	0.00079991	0.000729518	0.00630585	0.00456908	0.000586174	0.0567488
7	10	F	Serum	Free flow	clot activator	0.5h,RT	stored immediately	2 M	-80C	sample	none	145	145-B		0.00823713	0.0574152	0.00733799	0.00258287	0.0589092	0.0265079	0.0109217	0.00726833	0.055473	0.0059219	0.00419968	0.00349576	0.0097742	0.00830404	0.0207986	0.00338211	0.000392288	0.000596681	0.0980097	0.00138584	0	0.0183587	0.00143167	0.00481561	0	0.470337	0.00919219	0.00252604	0.0266912	0.000699336	0.000452781	0.00587424	0.00479361	0.000510524	0.0492981
7	10	F	Serum	Free flow	clot activator	0.5h,RT	stored immediately	2 M	-80C	sample	none	145	145-C		0.010662	0.0590431	0.0108941	0.00401303	0.0599088	0.0303442	0.0138759	0.00726859	0.0676953	0.00588313	0.0044505	0.00395292	0.010009	0.00944297	0.0219676	0.00297162	0.000978518	0.00105991	0.102979	0.00162038	0	0.0165895	0.00206247	0.00364308	2.03e-05	0.471764	0.00628268	0.00233808	0.0225845	0.000195149	0.000463362	0.00380864	0.00266919	0.000398621	0.0306541
8	10	F	Serum	Free flow	clot activator	0.5h,RT	stored immediately	2 M	-20C	sample	none	144	144-A		0.0114619	0.0671687	0.00833904	0.00367735	0.0643642	0.0345846	0.0064075	0.010642	0.0757226	0.00818515	0.00393471	0.00362959	0.0161076	0.00292118	0.0269487	0.00295037	0.000331651	0.000151233	0.0858764	0.000339611	0.000469618	0.0146935	0.0015707	0.00311752	0.000201644	0.459093	0.00583971	0.00348366	0.0158423	7.69e-05	0	0.00430085	0.00335896	0.000665956	0.0405145
8	10	F	Serum	Free flow	clot activator	0.5h,RT	stored immediately	2 M	-20C	sample	none	144	144-B		0.00520234	0.0308883	0.0047122	0.00136806	0.0284903	0.0186906	0.00812148	0.002581	0.0418079	0.00461293	0.003431	0.00337206	0.00549704	0.00481457	0.0148067	0.00275783	0.000787951	0.000108576	0.0956337	0.000558391	0.000189232	0.0169037	0.00061423	0.00354268	0.000403282	0.592049	0.00646492	0.00441439	0.0220812	0.00011478	0.000794156	0.00448884	0.00432442	0.000266787	0.0506646
8	10	F	Serum	Free flow	clot activator	0.5h,RT	stored immediately	2 M	-20C	sample	none	144	144-C		0.00825275	0.0544922	0.00839558	0.00319755	0.0552867	0.0250466	0.00766269	0.00814473	0.0646508	0.00679323	0.00369298	0.00371798	0.0142926	0.00631744	0.0278969	0.00363317	0.000847145	0.000121403	0.110117	0.00167019	0	0.0221713	0.00129973	0.00379832	0.000173178	0.475848	0.00746452	0.0029351	0.0219312	0.000195495	0.000931056	0.00455084	0.00456244	0.000360639	0.0311569
9	10	F	Serum	Free flow	clot activator	0.5h,RT	24h,4C	until analysis	-80C	sample	none	142	142-A		0.0049698	0.0375478	0.00673871	0.00211268	0.042545	0.0420441	0.00596695	0.00658618	0.109286	0.00444846	0.00476035	0.00352872	0.0125759	0.00561408	0.0410811	0.00369719	0.000286851	0.000564595	0.103792	0.00106772	0.000277744	0.0221945	0.00269549	0.00326919	0.000341489	0.481413	0.00483093	0.00115651	0.0160136	4.55e-05	0.000127489	0.00227659	0.0014593	0.000361978	0.0196857
9	10	F	Serum	Free flow	clot activator	0.5h,RT	24h,4C	until analysis	-80C	sample	none	142	142-B		0.00450247	0.0612222	0.00649114	0.00265409	0.0592639	0.0444636	0.0037271	0.0068229	0.123199	0.00526837	0.00350529	0.00378966	0.0126202	0.00338965	0.0485035	0.00383705	0.000716604	0.000576316	0.100254	0.00154506	9.1e-05	0.0194222	0.00144837	0.00338776	0.000149766	0.4264	0.00419346	0.0013915	0.01477	0.000115642	0.000172516	0.00177634	0.000968742	5.12e-05	0.0240309
9	10	F	Serum	Free flow	clot activator	0.5h,RT	24h,4C	until analysis	-80C	sample	none	142	142-C		0.00541376	0.0376236	0.00608127	0.00187672	0.0356854	0.030542	0.00709004	0.00510817	0.0689326	0.00342532	0.00273434	0.00462045	0.00827438	0.00611413	0.0267304	0.00309297	0.000570339	0.000341734	0.0862559	0.000959484	0	0.0216156	0.00460825	0.0040947	6.76e-05	0.511199	0.00778665	0.00266628	0.0260727	0.000583483	0.000573625	0.00638592	0.00540484	0.000455332	0.0537818
10	10	F	Serum	Free flow	clot activator	0.5h,RT	48h,4C	until analysis	-80C	sample	none	143	143-A		0.00473577	0.0228573	0.0049156	0.00262524	0.0266885	0.0257948	0.00601179	0.00410154	0.0684372	0.00481115	0.00345115	0.00458825	0.00671924	0.00710581	0.0275629	0.00335531	0.00118341	0.000510404	0.0982948	0.00182303	0.000175519	0.0195386	0.00303227	0.00446119	0.000529786	0.534149	0.00747624	0.00240019	0.0227291	0.000516865	0.000456564	0.00475839	0.00488653	0.000654696	0.0549966
10	10	F	Serum	Free flow	clot activator	0.5h,RT	48h,4C	until analysis	-80C	sample	none	143	143-B		0.0139534	0.0694429	0.0177634	0.00497823	0.0686177	0.0515704	0.0127647	0.00899014	0.131198	0.0124251	0.0059391	0.0088442	0.0132591	0.012061	0.0519427	0.00553334	0.00157871	0.000359387	0.115708	0.00303399	4.36e-05	0.0205765	0.00353863	0.00443131	0.000289828	0.316137	0.00546514	0.00143755	0.0134201	0	0.000306195	0.00194287	0.00244001	0.000216178	0.0153745
10	10	F	Serum	Free flow	clot activator	0.5h,RT	48h,4C	until analysis	-80C	sample	none	143	143-C		0.00761523	0.0465749	0.0095172	0.00315358	0.0494094	0.0429673	0.00756614	0.00855271	0.10142	0.00814533	0.00509972	0.00561019	0.0122732	0.00720293	0.0378872	0.00488867	0.0012418	0.000601267	0.106331	0.00243206	0	0.0198541	0.00219156	0.00263085	0.000689616	0.431445	0.00575498	0.00324193	0.0179865	0.000336219	0.00152894	0.00321003	0.00313886	0.000539913	0.0315211
11	10	H	Plasma	Free flow	citrate	0.5h,RT	stored immediately	until analysis	-80C	reference	none	137	137-A		0.00550423	0.0187836	0.00434819	0.00177799	0.017758	0.0205739	0.00894626	0.00229148	0.0506557	0.00519257	0.00253587	0.00441135	0.0037688	0.0112487	0.0206879	0.00338299	0.000572528	0.000475047	0.113656	0.00109014	0.000131805	0.0217437	0.00321961	0.00556739	0.000182605	0.518725	0.0100433	0.00278987	0.0289339	0.000568409	0.00131119	0.00710923	0.0079083	0.00102012	0.0696177
11	10	H	Plasma	Free flow	citrate	0.5h,RT	stored immediately	until analysis	-80C	reference	none	137	137-B		0.00585956	0.0193882	0.00485488	0.00195199	0.0185923	0.0232402	0.0111832	0.00220204	0.0522368	0.00614814	0.0028778	0.0038054	0.00405724	0.0133807	0.0205766	0.00355535	0.000878306	0.000423021	0.121859	0.000849627	0.000295756	0.0211869	0.00315921	0.00519545	0	0.506825	0.0111894	0.00438436	0.0295129	0.00170822	0.00134614	0.0058721	0.00629064	0.000744768	0.0627308
11	10	H	Plasma	Free flow	citrate	0.5h,RT	stored immediately	until analysis	-80C	reference	none	137	137-C		0.00686112	0.030273	0.00698115	0.00238295	0.0299672	0.034601	0.00827292	0.00295238	0.0786697	0.00572445	0.00349825	0.00531341	0.00598587	0.00972965	0.0306161	0.00412851	0.00095033	0.000613823	0.117173	0.00164691	0	0.0213824	0.00279125	0.00466232	6.25e-05	0.458312	0.00829539	0.00316448	0.0248346	0.000249914	0.00100568	0.00452201	0.0050487	0.000608343	0.0577712
12	10	G	Plasma	Vacuum	citrate	0.5h,RT	stored immediately	until analysis	-80C	sample	none	136	136-A		0.00706	0.0302051	0.00654438	0.00311534	0.0271907	0.0219769	0.00528238	0.00353361	0.055712	0.00360572	0.00226079	0.00455763	0.00392303	0.0035913	0.0190598	0.00148556	0.000508407	0.000771624	0.110613	0.001262	2.88e-05	0.0147294	0.00329202	0.00268987	5.41e-05	0.586207	0.00384731	0.00103484	0.016525	0.000501195	0	0.00298193	0.00284131	0.000191103	0.0431821
12	10	G	Plasma	Vacuum	citrate	0.5h,RT	stored immediately	until analysis	-80C	sample	none	136	136-B		0.00429648	0.0213204	0.00482568	0.00232068	0.0224794	0.0188852	0.00507981	0.00312776	0.0496196	0.00317523	0.00266278	0.00727064	0.00569001	0.00524598	0.0210132	0.00278566	0.000351873	0.00122178	0.110954	0.00114917	2.51e-05	0.0197942	0.00630439	0.00443471	2.93e-05	0.555576	0.00820617	0.00331626	0.0248964	0.00053898	0.000478938	0.00441098	0.00507842	0.000702349	0.0567199
12	10	G	Plasma	Vacuum	citrate	0.5h,RT	stored immediately	until analysis	-80C	sample	none	136	136-C		0.00271697	0.0185682	0.00380774	0.00159575	0.0204179	0.0171166	0.00381024	0.00268852	0.0481389	0.0025992	0.00236768	0.00527675	0.00539102	0.00486808	0.0200886	0.00275289	0.000665145	0.000555868	0.108814	0.00118708	0	0.0206025	0.00492597	0.00487457	6.29e-05	0.543744	0.00871924	0.00306526	0.0265799	0.000384716	0.000848272	0.00645934	0.00518095	0.000649178	0.0748795
13	10	I	Plasma	Free flow	EDTA	0.5h,RT	stored immediately	until analysis	-80C	sample	none	149	149-A		0.00553992	0.0393643	0.00545531	0.00195332	0.0363038	0.0232522	0.0048741	0.00382939	0.0549615	0.00361235	0.0032445	0.0021961	0.00563924	0.00425242	0.0189078	0.00257867	0.000982177	0.000684213	0.099119	0.00130957	0.000776178	0.0116684	0.000993213	0.00206735	0.000728356	0.567261	0.00486674	0.00218507	0.0179882	0.001442	0.000809285	0.00340267	0.00215932	0.000713642	0.0519414
13	10	I	Plasma	Free flow	EDTA	0.5h,RT	stored immediately	until analysis	-80C	sample	none	149	149-B		0.00865523	0.0379795	0.00679318	0.00310832	0.0360095	0.0332004	0.0110864	0.00429327	0.070282	0.00537026	0.00302001	0.00371184	0.00563277	0.00984998	0.022877	0.00332912	0.000350821	0.000598604	0.124439	0.00113833	0.000112852	0.018174	0.00157011	0.004097	4.17e-05	0.491022	0.00967334	0.00191357	0.0206911	0.00105737	0.0010083	0.00241404	0.00240668	8.83e-05	0.0434356
13	10	I	Plasma	Free flow	EDTA	0.5h,RT	stored immediately	until analysis	-80C	sample	none	149	149-C		0.0056273	0.0256788	0.00412825	0.00225248	0.0283625	0.0232756	0.0105428	0.00465824	0.0509107	0.00370477	0.00375933	0.00410746	0.00636774	0.00818116	0.0182796	0.00304228	0.000439065	0.000244214	0.113455	0.000701465	0	0.017573	0.00200307	0.00381129	0.000111715	0.551484	0.00753425	0.00182381	0.02253	0.000517005	0.00113533	0.00394899	0.0032709	0.000587152	0.0517863
14	10	J	Plasma	Free flow	Li heparin	0.5h,RT	stored immediately	until analysis	-80C	sample	none	148	148-A		0.00109991	0.0182854	0.00174744	0.00133941	0.0202901	0.0174757	0.00144966	0.00252296	0.0489499	0.00209845	0.00260026	0.00275865	0.00508647	0.00267629	0.0199784	0.00259139	0.000478995	0.000329467	0.101892	0.00129633	0	0.0201342	0.00153836	0.00470124	0.000108978	0.557888	0.010733	0.00233795	0.0289259	0.000465056	0.000556293	0.00672747	0.00428941	0.000791988	0.0797475
14	10	J	Plasma	Free flow	Li heparin	0.5h,RT	stored immediately	until analysis	-80C	sample	none	148	148-B		0.001734	0.0129169	0.00174582	0.000964514	0.0139039	0.0118117	0.00432022	0.00173754	0.0307675	0.00189593	0.00148105	0.0025874	0.00369494	0.00509325	0.0113011	0.00182265	0.0001182	0.000395971	0.100905	0.000995246	0.000221034	0.0172868	0.00204959	0.00407318	0.000215124	0.612138	0.00940047	0.00194085	0.0296021	5.32e-05	0.000258859	0.00723267	0.00542894	0.000459799	0.0776776
14	10	J	Plasma	Free flow	Li heparin	0.5h,RT	stored immediately	until analysis	-80C	sample	none	148	148-C		0.00421989	0.0415683	0.0036152	0.00199316	0.0375041	0.0321708	0.00445087	0.00435485	0.0726543	0.00452354	0.0029015	0.00229421	0.00705651	0.00463254	0.0263652	0.00308057	0.000957651	0.000487909	0.111658	0.00075003	1.56e-05	0.0173519	0.00126389	0.0037242	0.000371122	0.510511	0.00702796	0.00198018	0.0195708	7.79e-06	0.000908341	0.00364893	0.00310653	0.000555385	0.0485703
15	10	K	Plasma	Free flow	citrate	hemolysis	stored immediately	until analysis	-80C	sample	hemolysis	150	150-A	469	0.00527553	0.0322836	0.00712129	0.00202288	0.0348434	0.0197565	0.00613659	0.00425629	0.0551614	0.00278257	0.0029608	0.00760474	0.00667016	0.00544707	0.0236875	0.00277589	0.000339746	0.000706226	0.111772	0.000702884	7.57e-05	0.0198222	0.00621679	0.00491462	7.69e-05	0.537433	0.00713021	0.00185691	0.0236318	0.000514631	0.000580353	0.00465507	0.00249184	0.000467847	0.0444978
15	10	K	Plasma	Free flow	citrate	hemolysis	stored immediately	until analysis	-80C	sample	hemolysis	150	150-B	469	0.00368044	0.0188573	0.00418657	0.00168144	0.0221153	0.0163352	0.00434536	0.00274757	0.042447	0.00258879	0.00249947	0.00652584	0.00608634	0.00637981	0.016949	0.00219891	0.000616715	0.000443751	0.105151	0.00102077	0	0.0191947	0.00544411	0.0043808	8.51e-06	0.580172	0.00939534	0.00247111	0.0263146	0.000842135	9.36e-05	0.00565251	0.00306656	0.000394131	0.0591536
15	10	K	Plasma	Free flow	citrate	hemolysis	stored immediately	until analysis	-80C	sample	hemolysis	150	150-C	469	0.00503004	0.0274031	0.00647593	0.00169655	0.0288276	0.0197365	0.00772007	0.00353372	0.050736	0.00363459	0.00283217	0.00677244	0.00557569	0.00663183	0.0187843	0.00284592	0.000175769	0.000643466	0.107327	0.0013282	0.000100876	0.0162624	0.00532197	0.00374464	0.00041726	0.557821	0.0072646	0.00220246	0.0215997	0.000224678	0.000414203	0.00524249	0.00278173	0.000186468	0.0524417
16	10	K	Plasma	Free flow	citrate	hemolysis	stored immediately	until analysis	-80C	sample	hemolysis	155	155-A	446	0.0107149	0.0299822	0.0124104	0.00289666	0.0326724	0.0260866	0.0111007	0.0046797	0.0681914	0.0058246	0.00349726	0.0101644	0.00722809	0.0095742	0.0257738	0.00323033	0.00152653	0.000369121	0.118855	0.000836256	0.000450452	0.0197553	0.00637098	0.00366618	0.000141809	0.50992	0.00565568	0.00184352	0.0196677	0.000727814	6.05e-05	0.00254631	0.00240241	0.000377462	0.0318028
16	10	K	Plasma	Free flow	citrate	hemolysis	stored immediately	until analysis	-80C	sample	hemolysis	155	155-B	446	0.0133743	0.0622293	0.0134883	0.00327156	0.0567039	0.0358242	0.00824776	0.00709234	0.0929523	0.00657795	0.00438741	0.00869568	0.0112598	0.00736933	0.0336906	0.0028917	0.00100822	0.000402021	0.118254	0.00228076	0.000193097	0.018618	0.00394899	0.00342667	0	0.429046	0.00441115	0.00108261	0.0145994	0.000359286	0.00051598	0.00209716	0.00162233	0.0005508	0.0223628
16	10	K	Plasma	Free flow	citrate	hemolysis	stored immediately	until analysis	-80C	sample	hemolysis	155	155-C	446	0.0348679	0.125139	0.0361953	0.00770699	0.105267	0.0664062	0.0113	0.0123566	0.156968	0.0150263	0.00681761	0.00918239	0.0185868	0.00826637	0.0550707	0.00461561	0.00162042	0.000483907	0.0963211	0.00233962	0	0.0139845	0.00189715	0.00191195	1.92e-05	0.18487	0.00342286	0.00152571	0.00496485	0.000223455	0	0.00072364	0.000791713	0.000559378	0.00654236
[truncated: 11 more columns]

## Sheet: CE-LIF
Condition	Person	Tube	Sample Type	Collection method	Additive	Conditions before centrifugation	Conditions after centrifugation	Storage time	Storage Temperature	Reference	Hemolysis	Sample	SampleX (X= A,B for replicates)	Free hemoglobin [mg/dl]	A0	A1	MAN5	A2B	FA2_A3	A23G1	FA2B	A2B3G1	FA26G1	FA23G1_FA2B6G1_A2G2	FA2B3G1_2BG2	aFA2G2	cFA2G2	cFA2BG2	A3G33_A36G3	A3G3	aFA3G3	cFA3G3	cFaFA3G3	A4G4	aFA4G4_cFA4G4	aF2A4G4	aF3A4G4
1	1	F	Serum	Free flow	clot activator	0.5h,RT	stored immediately	until analysis	-80C	reference	none	3	3-A		0.00122721	0.00501412	0.00750552	0.00484837	0.0184326	0.00636698	0.00585104	0.00556925	0.015654	0.525098	0.0204283	0.00536306	0.145501	0.0386635	0.0130707	0.130482	0.0102106	0.0171905	0.00245826	0.0183924	0.00104378	0.000347196	0.00128107
1	1	F	Serum	Free flow	clot activator	0.5h,RT	stored immediately	until analysis	-80C	reference	none	3	3-B		0.00129182	0.00469428	0.00742843	0.00468552	0.0181461	0.00637048	0.00589697	0.00545144	0.0151907	0.525099	0.0205377	0.00497421	0.146705	0.0388622	0.0131166	0.132096	0.0105102	0.0169156	0.00231492	0.0172332	0.00102798	0.000280386	0.00117092
2	1	A	Serum	Free flow	clot activator	6h,RT	stored immediately	until analysis	-80C	sample	none	4	4-A		0.00119186	0.00439655	0.00929703	0.00574098	0.0205036	0.00558852	0.00536094	0.00507654	0.0161015	0.492785	0.0170792	0.0151982	0.15641	0.0432236	0.0131493	0.13451	0.0106132	0.021657	0.00162175	0.0183236	0.00142837	0	0.000744503
2	1	A	Serum	Free flow	clot activator	6h,RT	stored immediately	until analysis	-80C	sample	none	4	4-B		0.00103182	0.004144	0.00993915	0.00581159	0.0212251	0.0055788	0.00544249	0.00538076	0.0166176	0.506642	0.0182159	0.0151427	0.152333	0.0409721	0.0135162	0.128129	0.0100447	0.0196131	0.00152617	0.0168094	0.00117	0	0.000714687
3	1	B	Serum	Free flow	clot activator	2h,RT	stored immediately	until analysis	-80C	sample	none	5	5-A		0.000843438	0.00314116	0.00751014	0.00541671	0.0194959	0.00607391	0.00587033	0.00557188	0.0155177	0.522288	0.0194875	0.0130143	0.150405	0.0397034	0.0135849	0.125159	0.0101848	0.0177601	0.00145157	0.0157931	0.00108156	0	0.00064601
3	1	B	Serum	Free flow	clot activator	2h,RT	stored immediately	until analysis	-80C	sample	none	5	5-B		0.00106183	0.00316372	0.00991263	0.00624123	0.0206103	0.00558613	0.005525	0.00540506	0.0172654	0.510267	0.0187802	0.0135906	0.154897	0.0410872	0.0135261	0.125247	0.00992826	0.018796	0.00138044	0.015962	0.00104031	0	0.000726419
4	1	C	Serum	Free flow	clot activator	2h,4C	stored immediately	until analysis	-80C	sample	none	6	6-A		0	0.00522237	0.00679916	0	0.0179729	0.00546383	0.00537405	0.00500001	0.016986	0.520424	0.0180236	0.00647018	0.145201	0.0337269	0.0138127	0.143505	0.0128687	0.0174862	0.00235155	0.0233131	0	0	0
4	1	C	Serum	Free flow	clot activator	2h,4C	stored immediately	until analysis	-80C	sample	none	6	6-B		0	0.00452908	0.00735479	0	0.0183859	0.00629556	0.00573926	0.00531081	0.0151241	0.534435	0.0193824	0.0051673	0.147799	0.0349298	0.013126	0.133822	0.0119231	0.0164272	0.00254442	0.0177043	0	0	0
5	1	D	Serum	Free flow	clot activator	0.5h,RT	6h,RT	until analysis	-80C	sample	none	11	11-A		0.00122416	0.00406878	0.00685555	0.005187	0.0206639	0.00572569	0.00555394	0.0052216	0.0160793	0.513896	0.0180555	0.0134372	0.152383	0.03991	0.0133083	0.128465	0.0105936	0.018806	0.00173297	0.0170046	0.00121735	0	0.000610662
5	1	D	Serum	Free flow	clot activator	0.5h,RT	6h,RT	until analysis	-80C	sample	none	11	11-B		0.00113083	0.0042591	0.00931136	0.00528827	0.0207195	0.00548637	0.00537921	0.00516572	0.0168705	0.498517	0.0175942	0.0142168	0.153358	0.0417969	0.0131516	0.135189	0.0104635	0.0205903	0.00169356	0.0178448	0.0013059	0	0.000667159
6	1	E	Serum	Free flow	gel	0.5h,RT	6h,RT	until analysis	-80C	sample	none	12	12-A		0.000827596	0.00497056	0.0070709	0.00518123	0.0190242	0.00611369	0.00569448	0.00556554	0.0155714	0.520268	0.0197394	0.00780875	0.146242	0.0367033	0.0135002	0.133152	0.00877025	0.0182489	0.00244874	0.0207594	0	0.000626536	0.00171235
6	1	E	Serum	Free flow	gel	0.5h,RT	6h,RT	until analysis	-80C	sample	none	12	12-B		0.00120822	0.0047213	0.0082457	0.00505568	0.0191495	0.00689393	0.00611263	0.00584301	0.0142428	0.534165	0.0217359	0.00520582	0.143725	0.0360105	0.0128294	0.127845	0.00998452	0.0159647	0.00229138	0.0172389	0	0.000311146	0.0012196
7	1	F	Serum	Free flow	clot activator	0.5h,RT	stored immediately	2 M	-80C	sample	none	10	10-A		0.00112631	0.0044833	0.00686224	0.00511913	0.0176057	0.00624883	0.00578192	0.00519604	0.0141831	0.509034	0.0191025	0.00972907	0.14678	0.0386633	0.0119499	0.142322	0.0108296	0.0202095	0.00175027	0.0207131	0.00169911	0	0.000611406
7	1	F	Serum	Free flow	clot activator	0.5h,RT	stored immediately	2 M	-80C	sample	none	10	10-B		0.000653396	0.00494047	0.00627499	0.00496107	0.0185744	0.00577931	0.00552417	0.00500071	0.0173031	0.498425	0.0187264	0.00933379	0.151458	0.0392141	0.0119011	0.144104	0.0109572	0.0205892	0.00177546	0.0221009	0.00181112	0	0.000592345
8	1	F	Serum	Free flow	clot activator	0.5h,RT	stored immediately	2 M	-20C	sample	none	9	9-A		0.00122153	0.0044146	0.00622611	0.0050325	0.0141853	0.00612433	0.00551067	0.00508574	0.0137196	0.508316	0.0191798	0.00963426	0.14852	0.0388579	0.0121492	0.143982	0.0109998	0.0205716	0.00178964	0.0221481	0.00172869	0	0.000602294
8	1	F	Serum	Free flow	clot activator	0.5h,RT	stored immediately	2 M	-20C	sample	none	9	9-B		0.00121489	0.00443554	0.00648293	0.00482073	0.0139548	0.00615771	0.00555178	0.00528226	0.0134903	0.512712	0.0194541	0.00945516	0.147904	0.0369479	0.012383	0.143555	0.0111806	0.0198097	0.00174612	0.0211415	0.00173251	0	0.000587384
9	1	F	Serum	Free flow	clot activator	0.5h,RT	24h,4C	until analysis	-80C	sample	none	7	7-A		0.000490552	0.00377862	0.00958052	0.00592288	0.020884	0.0056609	0.00552948	0.00535141	0.0170426	0.511105	0.0183418	0.013816	0.155588	0.0421748	0.0134213	0.123028	0.00981119	0.0190643	0.00147519	0.0161606	0.00110719	0	0.000665454
9	1	F	Serum	Free flow	clot activator	0.5h,RT	24h,4C	until analysis	-80C	sample	none	7	7-B		0.000894766	0.00394486	0.00957769	0.00542857	0.0199456	0.00589653	0.00567793	0.00561166	0.0146932	0.518425	0.0195131	0.0135841	0.151715	0.0412589	0.013225	0.123382	0.00981873	0.0182395	0.00157082	0.0160627	0.00106186	0	0.000472993
10	1	F	Serum	Free flow	clot activator	0.5h,RT	48h,4C	until analysis	-80C	sample	none	8	8-A		0.0012109	0.00461778	0.00744444	0.00472164	0.0187213	0.00661896	0.00590252	0.00559247	0.0154953	0.529193	0.0206191	0.00548123	0.145391	0.0357655	0.0130785	0.130924	0.0101635	0.0162952	0.00232975	0.017913	0.00101022	0.000290908	0.00121959
10	1	F	Serum	Free flow	clot activator	0.5h,RT	48h,4C	until analysis	-80C	sample	none	8	8-B		0.00100706	0.00411385	0.00863428	0.00483639	0.019754	0.00676092	0.00620926	0.00592971	0.0150793	0.538394	0.0218	0.00534192	0.143841	0.0346964	0.0131692	0.125034	0.00989345	0.0145781	0.00231633	0.0164185	0.0009549	0.000232304	0.00100503
11	1	H	Plasma	Free flow	citrate	0.5h,RT	stored immediately	until analysis	-80C	reference	none	2	2-A		0.00356674	0.00365866	0.00673654	0.00492344	0.0174824	0.0058233	0.00545852	0.005058	0.0146573	0.521878	0.0181036	0.0121981	0.140992	0.035262	0.0120414	0.137862	0.00946678	0.0196384	0.00141856	0.021243	0.00156196	0	0.000969479
11	1	H	Plasma	Free flow	citrate	0.5h,RT	stored immediately	until analysis	-80C	reference	none	2	2-B		0.0035976	0.00356552	0.00800877	0.0051819	0.0191638	0.00639788	0.0059118	0.0055133	0.0128438	0.537919	0.0197497	0.0117941	0.13396	0.0317383	0.0118777	0.132947	0.00903974	0.0175388	0.00127827	0.0197592	0.00138823	0	0.000825087
12	1	G	Plasma	Vacuum	citrate	0.5h,RT	stored immediately	until analysis	-80C	sample	none	1	1-A		0.00101938	0.00417341	0.00632581	0.00461563	0.0190687	0.00600943	0.00542415	0.00512169	0.0168462	0.524385	0.0189654	0.00661994	0.142562	0.0393199	0.0133302	0.13255	0.00958492	0.0178429	0.00213551	0.0210584	0.00136416	0.000371223	0.00130612
12	1	G	Plasma	Vacuum	citrate	0.5h,RT	stored immediately	until analysis	-80C	sample	none	1	1-B		0.00109116	0.00463742	0.00691814	0.00474402	0.0188254	0.0061852	0.00547737	0.00504938	0.0150445	0.532394	0.0188838	0.00561353	0.138632	0.0373094	0.0128065	0.133992	0.0100378	0.0171522	0.00198916	0.0202668	0.0013045	0.000321466	0.00132471
13	1	I	Plasma	Free flow	EDTA	0.5h,RT	stored immediately	until analysis	-80C	sample	none	14	14-A		0.00550259	0.00413294	0.0088714	0	0.0187952	0.00492873	0.00503863	0.00546725	0.0143466	0.524297	0.0177738	0.0142628	0.145411	0.036592	0.0136779	0.127466	0.00740122	0.0215604	0.00210666	0.0186976	0	0.00172202	0.00194743
13	1	I	Plasma	Free flow	EDTA	0.5h,RT	stored immediately	until analysis	-80C	sample	none	14	14-B		0.00675127	0.00456322	0.00708511	0.00447026	0.018007	0.00600919	0.00553769	0.00540675	0.0135459	0.533309	0.0197927	0.00812101	0.13716	0.0323657	0.012888	0.132482	0.0104516	0.0177657	0.00214574	0.0194798	0.00118482	0.000354309	0.0011224
14	1	J	Plasma	Free flow	Li heparin	0.5h,RT	stored immediately	until analysis	-80C	sample	none	13	13-A		0.000485588	0.00274052	0.00929973	0.00507618	0.0187995	0.00531729	0.00527776	0.00519953	0.0171889	0.53075	0.017975	0.0146436	0.151995	0.0414776	0.0134485	0.115069	0.0097342	0.0171315	0.00149176	0.0152302	0.00109524	0	0.000573313
14	1	J	Plasma	Free flow	Li heparin	0.5h,RT	stored immediately	until analysis	-80C	sample	none	13	13-B		0.000732221	0.00288604	0.00929174	0	0.0199704	0.00557505	0.00549491	0.00532035	0.0165388	0.535322	0.0182789	0.0139678	0.149593	0.0391335	0.0135041	0.119175	0.00998705	0.0170166	0.00150313	0.0151153	0.00103433	0	0.000560213
15	1	K	Plasma	Free flow	citrate	hemolysis	stored immediately	until analysis	-80C	sample	hemolysis	15	15-A	175	0.00124763	0.00480131	0.00733476	0.00508337	0.0191352	0.00699578	0.00605675	0.00556995	0.0133158	0.537593	0.0202469	0.00717416	0.13783	0.0355404	0.0126438	0.129936	0.00910669	0.015973	0.00209471	0.0194561	0.00106454	0.000420585	0.00137987
15	1	K	Plasma	Free flow	citrate	hemolysis	stored immediately	until analysis	-80C	sample	hemolysis	15	15-B	175	0.00124927	0.00508695	0.00698248	0.00489148	0.0193569	0.00634254	0.00567438	0.00541229	0.014845	0.530383	0.0194468	0.00732035	0.14139	0.0368118	0.0130181	0.130382	0.00902924	0.0168229	0.00216425	0.020425	0.00107547	0.000416367	0.00147308
1	2	F	Serum	Free flow	clot activator	0.5h,RT	stored immediately	until analysis	-80C	reference	none	18	18-A		0.000430136	0.000924268	0.0102395	0.00529931	0.0258079	0.00564199	0.00687354	0.0059975	0.0169279	0.501535	0.0199206	0.00981752	0.15121	0.0490488	0.0137991	0.134092	0.00342988	0.0172418	0	0.0205413	0.000591389	0	0.000629693
1	2	F	Serum	Free flow	clot activator	0.5h,RT	stored immediately	until analysis	-80C	reference	none	18	18-B		0.000358394	0.000897172	0.0104697	0.00533085	0.0258293	0.00563789	0.00708425	0.00608751	0.0160842	0.504103	0.0201251	0.0101666	0.151456	0.0489577	0.0138793	0.132812	0.00336801	0.0172819	0	0.0188294	0.000587381	0	0.000654892
2	2	A	Serum	Free flow	clot activator	6h,RT	stored immediately	until analysis	-80C	sample	none	19	19-A		0	0.000686847	0.0136389	0	0.0284632	0.00533262	0.00687292	0.00583718	0.0177098	0.495347	0.018308	0.0147063	0.150419	0.0543398	0.0156545	0.131188	0.0035907	0.0183259	0.000648796	0.0189306	0	0	0
2	2	A	Serum	Free flow	clot activator	6h,RT	stored immediately	until analysis	-80C	sample	none	19	19-B		0	0.000755812	0.0132922	0.00675294	0.0269994	0.00541632	0.00677892	0.005874	0.0177267	0.493345	0.0184815	0.0149848	0.153138	0.05594	0.0152732	0.126186	0.0035108	0.0178581	0.000648773	0.0170375	0	0	0
3	2	B	Serum	Free flow	clot activator	2h,RT	stored immediately	until analysis	-80C	sample	none	20	20-A		0.00113574	0.00117872	0.0101498	0.00527878	0.0263301	0.00603495	0.00692028	0.00556359	0.017445	0.507744	0.0189387	0.00574212	0.148673	0.0465066	0.0151807	0.132933	0.00372661	0.0150754	0.0014874	0.0215547	0.00065646	0.000301883	0.0014417
3	2	B	Serum	Free flow	clot activator	2h,RT	stored immediately	until analysis	-80C	sample	none	20	20-B		0.00100211	0.000982622	0.0105055	0.00534203	0.0265021	0.00610214	0.00700906	0.00565993	0.0175784	0.516207	0.0194192	0.00483559	0.147884	0.0449198	0.0152783	0.130209	0.00395675	0.0139182	0.00140429	0.019213	0.000630097	0.000176843	0.00126362
4	2	C	Serum	Free flow	clot activator	2h,4C	stored immediately	until analysis	-80C	sample	none	21	21-A		0	0.000753719	0.0099148	0.00509406	0.0269728	0.00558184	0.00716977	0.00598413	0.0191381	0.518009	0.0201803	0.00838829	0.158399	0.0542985	0.0153881	0.125339	0.00367183	0.0157168	0	0	0	0	0
4	2	C	Serum	Free flow	clot activator	2h,4C	stored immediately	until analysis	-80C	sample	none	21	21-B		0	0.000804064	0.0109329	0	0.0278847	0.00605334	0.00754052	0.00654876	0.0166116	0.522943	0.0220883	0.00784788	0.151466	0.0511819	0.0150975	0.119585	0.00360642	0.0142736	0	0.0155346	0	0	0
5	2	D	Serum	Free flow	clot activator	0.5h,RT	6h,RT	until analysis	-80C	sample	none	26	26-A		0.000625935	0.000757128	0.0126805	0.006465	0.0294094	0.0055109	0.00716049	0.00609509	0.0185218	0.507436	0.0194122	0.0129567	0.158618	0.0537453	0.0145653	0.109455	0.00294336	0.0153344	0.000853855	0.016392	0.000390443	0	0.000670426
5	2	D	Serum	Free flow	clot activator	0.5h,RT	6h,RT	until analysis	-80C	sample	none	26	26-B		0	0.000815635	0.012173	0.0073261	0.0275386	0.00542003	0.00700459	0.00588853	0.0186793	0.499922	0.0189965	0.012508	0.158596	0.0558957	0.0147517	0.1168	0.00318209	0.0165129	0.000970351	0.0159055	0.000400549	0	0.000713268
6	2	E	Serum	Free flow	gel	0.5h,RT	6h,RT	until analysis	-80C	sample	none	27	27-A		0.000332511	0.000844134	0.0107526	0.00513422	0.0270785	0.00587873	0.00719453	0.00619007	0.0183181	0.515527	0.0208344	0.0077174	0.156151	0.0529551	0.0150803	0.114607	0.00346149	0.0141411	0.00136773	0.0151722	0.000459457	9.55553e-05	0.000706736
6	2	E	Serum	Free flow	gel	0.5h,RT	6h,RT	until analysis	-80C	sample	none	27	27-B		0.000902452	0.000819651	0.0105838	0.00518629	0.0273081	0.00578539	0.00724575	0.00626283	0.0188258	0.514892	0.0208937	0.00737357	0.155503	0.0526072	0.0150545	0.115091	0.00360728	0.0139775	0.00163245	0.0152247	0.000451886	7.27994e-05	0.000698443
7	2	F	Serum	Free flow	clot activator	0.5h,RT	stored immediately	2 M	-80C	sample	none	25	25-A		0.0011649	0.00126289	0.0119721	0.00750958	0.0256465	0.00523703	0.00750919	0.00831832	0.0227618	0.472105	0.0205208	0.014685	0.149454	0.0586813	0.0163473	0.115299	0.017602	0.0113853	0.00274163	0.0246978	0.00416557	0	0.000933205
7	2	F	Serum	Free flow	clot activator	0.5h,RT	stored immediately	2 M	-80C	sample	none	25	25-B		0.000858702	0.00117872	0.0116089	0.00725315	0.0254167	0.00529481	0.0075891	0.00808898	0.0229628	0.469294	0.0205544	0.0148389	0.15148	0.0591576	0.0164428	0.1164	0.0178897	0.0116737	0.00184711	0.0247794	0.00426317	0.000183074	0.000943961
8	2	F	Serum	Free flow	clot activator	0.5h,RT	stored immediately	2 M	-20C	sample	none	24	24-A		0.00101141	0.00104031	0.00986328	0.00589099	0.0222974	0.00597489	0.00698563	0.00612225	0.0157838	0.50263	0.0205993	0.00924429	0.151984	0.0525537	0.013909	0.132264	0.00333385	0.0173309	0.00104601	0.0196061	0.000529336	0	0
8	2	F	Serum	Free flow	clot activator	0.5h,RT	stored immediately	2 M	-20C	sample	none	24	24-B		0.000900487	0.0010068	0.00970457	0.00559703	0.0216382	0.00572974	0.00692983	0.00574046	0.015078	0.500194	0.0198272	0.00960329	0.152237	0.0521904	0.0141986	0.135729	0.00349113	0.0180064	0.00112246	0.020517	0.000558464	0	0
9	2	F	Serum	Free flow	clot activator	0.5h,RT	24h,4C	until analysis	-80C	sample	none	22	22-A		0.00100113	0.000791761	0.0101741	0.00509916	0.0262681	0.00562018	0.00716182	0.00608035	0.0175387	0.511722	0.0204756	0.00786512	0.14931	0.0515233	0.01547	0.125311	0.0037246	0.014884	0.00143576	0.0170267	0.000517324	0.000109354	0.000889873
9	2	F	Serum	Free flow	clot activator	0.5h,RT	24h,4C	until analysis	-80C	sample	none	22	22-B		0.00110481	0.000937214	0.00999099	0.00511257	0.0258626	0.00562747	0.00699152	0.00598964	0.0180484	0.507843	0.0200914	0.00777229	0.152509	0.0519993	0.0153029	0.126614	0.00378152	0.0153093	0.00140883	0.0163047	0.000492905	9.894e-05	0.000806362
10	2	F	Serum	Free flow	clot activator	0.5h,RT	48h,4C	until analysis	-80C	sample	none	23	23-A		0.000644145	0.000786686	0.0109255	0.00538083	0.0275704	0.00565993	0.00726117	0.00643379	0.0174611	0.519103	0.0215687	0.00815834	0.149868	0.0515546	0.0154252	0.116194	0.00343397	0.0140784	0.00116055	0.0161541	0.000436438	0	0.000741166
10	2	F	Serum	Free flow	clot activator	0.5h,RT	48h,4C	until analysis	-80C	sample	none	23	23-B		0.000327215	0.000921134	0.0110054	0.00577329	0.0278218	0.00610781	0.00749019	0.00684294	0.0166631	0.525258	0.0225978	0.00836383	0.151547	0.0518919	0.0146008	0.109659	0.00333102	0.0133698	0.00142659	0.0139096	0.000415921	0	0.000676043
11	2	H	Plasma	Free flow	citrate	0.5h,RT	stored immediately	until analysis	-80C	reference	none	17	17-A		0.000915763	0.000850379	0.0106415	0.00688393	0.0271478	0.00672724	0.00727489	0.0063547	0.0143593	0.520351	0.0210013	0.0101822	0.142133	0.044465	0.0131155	0.12658	0.00296449	0.0165234	0.000705991	0.019893	0	0	0.00092983
11	2	H	Plasma	Free flow	citrate	0.5h,RT	stored immediately	until analysis	-80C	reference	none	17	17-B		0.000626094	0.000731763	0.0105745	0.00640916	0.0261864	0.00615893	0.00683886	0.00612284	0.0143327	0.520091	0.0198989	0.0110928	0.140414	0.0439832	0.0133969	0.130297	0.00282643	0.0168165	0.000769449	0.0213465	0	0	0.00108623
12	2	G	Plasma	Vacuum	citrate	0.5h,RT	stored immediately	until analysis	-80C	sample	none	16	16-A		0.00311839	0.000966576	0.00992383	0.00560318	0.0265187	0.00616387	0.00686845	0.00588043	0.0167764	0.512213	0.0197296	0.00672983	0.14037	0.0501641	0.0150603	0.130094	0.00314705	0.015057	0.00116359	0.0215933	0.000569886	0.000481853	0.00180644
12	2	G	Plasma	Vacuum	citrate	0.5h,RT	stored immediately	until analysis	-80C	sample	none	16	16-B		0.000946047	0.00116711	0.0101504	0.00597785	0.0261431	0.00635908	0.00697938	0.00586262	0.0169188	0.516497	0.0199151	0.00568621	0.141008	0.050437	0.0147601	0.129272	0.00320421	0.0145541	0.00118173	0.0203208	0.000505349	0.000462342	0.00169173
13	2	I	Plasma	Free flow	EDTA	0.5h,RT	stored immediately	until analysis	-80C	sample	none	29	29-A		0.00138834	0.000900877	0.0115477	0.00719055	0.0267131	0.00471692	0.00582209	0.00545017	0.0182137	0.491067	0.0169357	0.014669	0.151598	0.0500095	0.0151557	0.131889	0.00365584	0.0201972	0.000692252	0.0210127	0.0005675	0	0.00060703
13	2	I	Plasma	Free flow	EDTA	0.5h,RT	stored immediately	until analysis	-80C	sample	none	29	29-B		0.000670253	0.000899012	0.0122074	0.00716345	0.0257905	0.00527467	0.00613746	0.00602953	0.0149727	0.494815	0.017986	0.0165467	0.150067	0.0504952	0.0152083	0.130038	0.00347992	0.0206359	0.000673225	0.0197922	0.000522606	0	0.000595059
14	2	J	Plasma	Free flow	Li heparin	0.5h,RT	stored immediately	until analysis	-80C	sample	none	28	28-A		0.000803512	0.00101902	0.0101309	0.00566953	0.0249376	0.00583273	0.00705586	0.00579674	0.0167616	0.495419	0.0198103	0.00896514	0.150566	0.0536051	0.0137983	0.135247	0.00338225	0.0174534	0.00103344	0.0214647	0.000619804	0	0.000627998
14	2	J	Plasma	Free flow	Li heparin	0.5h,RT	stored immediately	until analysis	-80C	sample	none	28	28-B		0.000520522	0.00113784	0.00986086	0.00583511	0.0253904	0.00583051	0.00710166	0.00566446	0.0171555	0.492027	0.0194099	0.0090122	0.150577	0.0532807	0.0135605	0.137997	0.00348852	0.0182462	0.00105551	0.0222261	0.000622792	0	0
15	2	K	Plasma	Free flow	citrate	hemolysis	stored immediately	until analysis	-80C	sample	hemolysis	30	30-A	133	0.000813995	0.000955019	0.00993006	0.00593183	0.0269422	0.00597487	0.006926	0.00628817	0.0151097	0.513171	0.0197189	0.0122109	0.145234	0.0489917	0.0150015	0.124043	0.00261874	0.0164293	0.000990951	0.0211504	0	0	0.00156815
15	2	K	Plasma	Free flow	citrate	hemolysis	stored immediately	until analysis	-80C	sample	hemolysis	30	30-B	133	0.000925653	0.00107369	0.00955536	0.0057667	0.0276284	0.00592171	0.00675597	0.00587444	0.0178709	0.512362	0.0193294	0.00803568	0.14653	0.0486562	0.015006	0.124094	0.00235468	0.0157261	0.00114104	0.0217276	0.000568065	0.00106927	0.00202726
1	3	F	Serum	Free flow	clot activator	0.5h,RT	stored immediately	until analysis	-80C	reference	none	33	33-A		0.00131729	0.000977996	0.00810307	0.00497514	0.0226684	0.00549833	0.00619864	0.00370933	0.0184787	0.558668	0.0147896	0.00860463	0.131833	0.0332954	0.0144713	0.0989199	0.0277664	0.0114085	0.00349392	0.018247	0.00485856	0.000472433	0.00124417
1	3	F	Serum	Free flow	clot activator	0.5h,RT	stored immediately	until analysis	-80C	reference	none	33	33-B		0.00132003	0.000997082	0.00792752	0.00479451	0.0222582	0.00537611	0.00625332	0.00371367	0.0191044	0.556066	0.0147273	0.00900277	0.133806	0.0339622	0.0146028	0.0998012	0.0279897	0.00919412	0.00360392	0.018662	0.00502329	0.00054473	0.00126929
2	3	A	Serum	Free flow	clot activator	6h,RT	stored immediately	until analysis	-80C	sample	none	34	34-A		0.000908913	0.000982876	0.00833759	0.0044851	0.0216434	0.0050936	0.00630762	0.00409597	0.0161861	0.565693	0.0152956	0.013108	0.129467	0.0325285	0.0146633	0.0928245	0.0301668	0.0083961	0.00394809	0.0162931	0.00844454	0.000378901	0.000752137
2	3	A	Serum	Free flow	clot activator	6h,RT	stored immediately	until analysis	-80C	sample	none	34	34-B		0.000945335	0.00097943	0.00768901	0.00410458	0.0213086	0.00455479	0.00610915	0.00381146	0.0183925	0.552855	0.0142681	0.0130806	0.131699	0.0331833	0.0148658	0.0983358	0.0323237	0.00890835	0.00416704	0.0178194	0.00926063	0.000476327	0.000862428
3	3	B	Serum	Free flow	clot activator	2h,RT	stored immediately	until analysis	-80C	sample	none	35	35-A		0.000707307	0.00107854	0.0096869	0.00519963	0.0212829	0.00388559	0.00592906	0.00341352	0.0197895	0.524264	0.0121298	0.0201173	0.138007	0.0377242	0.0147642	0.102853	0.0330054	0.0116666	0.00525098	0.0198847	0.00706571	0.00139666	0.00089769
3	3	B	Serum	Free flow	clot activator	2h,RT	stored immediately	until analysis	-80C	sample	none	35	35-B		0.000723084	0.00102603	0.00949453	0.00465713	0.0205609	0.00457211	0.00608021	0.0035858	0.0174768	0.541715	0.0129976	0.0179414	0.135444	0.0374665	0.014928	0.0990228	0.0321139	0.010272	0.00472268	0.0174937	0.00608973	0.000892028	0.000723634
4	3	C	Serum	Free flow	clot activator	2h,4C	stored immediately	until analysis	-80C	sample	none	36	36-A		0.00118608	0.00127992	0.00724251	0.00502455	0.0210926	0.00527323	0.00616774	0.00375443	0.0177374	0.549432	0.0143893	0.00956059	0.13136	0.0344433	0.0146302	0.105382	0.0294014	0.00990501	0.00406618	0.0214627	0.00555479	0	0.00165369
4	3	C	Serum	Free flow	clot activator	2h,4C	stored immediately	until analysis	-80C	sample	none	36	36-B		0.00137241	0.00122393	0.00761909	0.00482463	0.0214421	0.00527362	0.00607243	0.0036277	0.0189195	0.551481	0.0144439	0.00886266	0.132178	0.0333308	0.0144329	0.104751	0.029666	0.00948442	0.00381186	0.0201959	0.00560347	0	0.00138302
5	3	D	Serum	Free flow	clot activator	0.5h,RT	6h,RT	until analysis	-80C	sample	none	41	41-A		0.00105108	0.000950042	0.00741083	0.00458639	0.0216372	0.00495611	0.00611339	0.00385285	0.0181278	0.557317	0.0146767	0.0129195	0.134435	0.0338526	0.0146826	0.0938708	0.030703	0.0086864	0.00395473	0.0169692	0.00850579	0	0.000741181
5	3	D	Serum	Free flow	clot activator	0.5h,RT	6h,RT	until analysis	-80C	sample	none	41	41-B		0.00163279	0.000984398	0.00744635	0.00456864	0.0213161	0.00503233	0.00619825	0.00384235	0.0181028	0.554264	0.0143607	0.0123561	0.133977	0.0334755	0.0143894	0.096496	0.0312892	0.00901304	0.00380038	0.0172376	0.00882121	0.000533145	0.000862796
6	3	E	Serum	Free flow	gel	0.5h,RT	6h,RT	until analysis	-80C	sample	none	42	42-A		0.00104807	0.00097682	0.00993913	0.00559873	0.0222267	0.00431186	0.00591458	0.0034803	0.0190692	0.527489	0.01215	0.020009	0.138607	0.0363807	0.0147448	0.101843	0.0318527	0.0112777	0.00506693	0.0191033	0.00675787	0.0012995	0.000853042
6	3	E	Serum	Free flow	gel	0.5h,RT	6h,RT	until analysis	-80C	sample	none	42	42-B		0.000940751	0.00099673	0.00716222	0.00553627	0.0236774	0.00470552	0.0061436	0.00353305	0.0184728	0.539597	0.0128362	0.0182537	0.139328	0.0368918	0.0143779	0.0975586	0.0305513	0.0104013	0.00454932	0.0177479	0.00603667	0	0.000702168
7	3	F	Serum	Free flow	clot activator	0.5h,RT	stored immediately	2 M	-80C	sample	none	40	40-A		0.00119533	0.00109476	0.00708143	0.00480154	0.0213252	0.00509728	0.00606524	0.00352786	0.0188566	0.534095	0.013589	0.0131416	0.135336	0.0346839	0.0131359	0.110679	0.0321107	0.0109522	0.00328063	0.0215745	0.00710431	0.000477636	0.00079523
7	3	F	Serum	Free flow	clot activator	0.5h,RT	stored immediately	2 M	-80C	sample	none	40	40-B		0.00112602	0.00112715	0.00703938	0.00487241	0.0215563	0.00496576	0.0061197	0.00348077	0.017794	0.534263	0.0134107	0.0136936	0.134699	0.0338452	0.0132922	0.111375	0.0325335	0.0110348	0.00339571	0.0218774	0.0072693	0.000483948	0.00074533
8	3	F	Serum	Free flow	clot activator	0.5h,RT	stored immediately	2 M	-20C	sample	none	39	39-A		0.00131822	0.00103879	0.00670674	0.00501705	0.016923	0.00511232	0.00595315	0.00337006	0.0164613	0.535151	0.0134829	0.013419	0.13371	0.034159	0.0137404	0.114628	0.0324794	0.0114164	0.00377459	0.0232737	0.00753962	0.0004889	0.000836299
8	3	F	Serum	Free flow	clot activator	0.5h,RT	stored immediately	2 M	-20C	sample	none	39	39-B		0.00127038	0.000975449	0.00667681	0.00488338	0.01637	0.00525625	0.00606924	0.00354034	0.0153214	0.543822	0.0140138	0.0132623	0.131427	0.0349088	0.0137907	0.112284	0.0319651	0.0109595	0.0038831	0.0212849	0.00684211	0.000455773	0.000737893
9	3	F	Serum	Free flow	clot activator	0.5h,RT	24h,4C	until analysis	-80C	sample	none	37	37-A		0.000900548	0.00120052	0.00749754	0.00395674	0.0206557	0.00438339	0.00581123	0.00351935	0.0176426	0.55808	0.0131063	0.0126756	0.126307	0.0292428	0.0151393	0.105211	0.0346587	0.00859666	0.00420213	0.0189251	0.00658738	0.000567424	0.00113289
9	3	F	Serum	Free flow	clot activator	0.5h,RT	24h,4C	until analysis	-80C	sample	none	37	37-B		0.000730092	0.00217408	0.0106758	0.00475304	0.0319826	0.00483963	0.00648779	0.00536316	0.0199754	0.544603	0	0.0108818	0.14016	0.0411514	0.0159483	0.0844321	0.0299847	0.00991342	0.00459842	0.0178839	0.0113529	0.000823472	0.00128518
10	3	F	Serum	Free flow	clot activator	0.5h,RT	48h,4C	until analysis	-80C	sample	none	38	38-A		0.00234968	0.00105813	0.00772605	0.00457846	0.0196966	0.00483113	0.0061926	0.00375204	0.015742	0.54978	0.0138094	0.0151398	0.13151	0.0309351	0.0134378	0.105417	0.0337655	0.0100654	0.0035429	0.0198487	0.00682159	0	0
10	3	F	Serum	Free flow	clot activator	0.5h,RT	48h,4C	until analysis	-80C	sample	none	38	38-B		0.00269582	0.00108136	0.00733324	0.00458192	0.0203364	0.00436304	0.00594039	0.00344456	0.0184089	0.535109	0.0131408	0.0148598	0.135172	0.031946	0.0138181	0.108622	0.0351728	0.0105703	0.0033886	0.0214974	0.00766463	0	0.000853044
11	3	H	Plasma	Free flow	citrate	0.5h,RT	stored immediately	until analysis	-80C	reference	none	32	32-A		0.00214179	0.000928864	0.0073496	0.00547072	0.0206177	0.00522447	0.00601999	0.0034633	0.0153572	0.557543	0.0130147	0.0140708	0.126377	0.0295853	0.0127382	0.105505	0.0288182	0.0102474	0.00194948	0.0219613	0.010497	0	0.00111923
11	3	H	Plasma	Free flow	citrate	0.5h,RT	stored immediately	until analysis	-80C	reference	none	32	32-B		0.00183639	0.000934996	0.00881563	0.00550246	0.021294	0.0055884	0.00635944	0.00396441	0.0143841	0.56882	0.0145389	0.015191	0.122174	0.0282042	0.012685	0.09936	0.0296962	0.00923409	0.00207111	0.0195072	0.00901606	0	0.000822788
12	3	G	Plasma	Vacuum	citrate	0.5h,RT	stored immediately	until analysis	-80C	sample	none	31	31-A		0.00125305	0.00121959	0.0098847	0.0063779	0.0250267	0.00620689	0.00805817	0.00866771	0.0210376	0.500439	0.0228608	0.00729012	0.139632	0.0556873	0.0161536	0.113206	0.0167733	0.00843252	0.00286325	0.0235917	0.00303302	0.000237989	0.00206635
12	3	G	Plasma	Vacuum	citrate	0.5h,RT	stored immediately	until analysis	-80C	sample	none	31	31-B		0.00121703	0.00132409	0.00969949	0.00670612	0.0248116	0.00607174	0.00802958	0.00882391	0.0198519	0.500774	0.0225725	0.00833169	0.143507	0.058923	0.0160051	0.109976	0.0157367	0.00893897	0.00293395	0.0221889	0	0.00101734	0.00255892
13	3	I	Plasma	Free flow	EDTA	0.5h,RT	stored immediately	until analysis	-80C	sample	none	44	44-A		0.00505416	0.00100924	0.00927873	0.00552822	0.0206721	0.0043074	0.00539401	0.00328142	0.0183079	0.531992	0.0116019	0.0184971	0.134102	0.0347138	0.0142275	0.103241	0.0317616	0.0116879	0.00495063	0.0215477	0.00711461	0.00103547	0.000693348
13	3	I	Plasma	Free flow	EDTA	0.5h,RT	stored immediately	until analysis	-80C	sample	none	44	44-B		0.00263117	0.00106815	0.00938835	0.00582864	0.0208552	0.00428351	0.00534228	0.00329276	0.0182869	0.533127	0.0116784	0.0188947	0.134636	0.0342547	0.0143247	0.104013	0.030698	0.0121532	0.00480004	0.02168	0.00704319	0.0010039	0.000716633
14	3	J	Plasma	Free flow	Li heparin	0.5h,RT	stored immediately	until analysis	-80C	sample	none	43	43-A		0	0.000615634	0.0104307	0.0049684	0.0218353	0.00476772	0.00605946	0.00353656	0.0185737	0.568173	0.0127701	0.0182289	0.132693	0.0328443	0.0149343	0.0908025	0.0279322	0.00908165	0.00414993	0.0165322	0	0.00107022	0
14	3	J	Plasma	Free flow	Li heparin	0.5h,RT	stored immediately	until analysis	-80C	sample	none	43	43-B		0.00114813	0	0.0103115	0.00615246	0.021791	0.00475833	0.00607488	0.00358786	0.0189767	0.565912	0.0127788	0.0191544	0.14021	0.0360252	0.0143171	0.0834299	0.0254539	0.00909856	0.00401112	0.0161282	0	0.000679584	0
15	3	K	Plasma	Free flow	citrate	hemolysis	stored immediately	until analysis	-80C	sample	hemolysis	45	45-A	156	0.000975038	0.000883354	0.0116421	0	0.02288	0.00486819	0.00636224	0.00390153	0.0158849	0.556939	0.0122735	0.0187583	0.13426	0.0353747	0.0161914	0.0953347	0.0206593	0.0129436	0.00593497	0.0205705	0	0.00110548	0.00225761
15	3	K	Plasma	Free flow	citrate	hemolysis	stored immediately	until analysis	-80C	sample	hemolysis	45	45-B	156	0.00127873	0.00104081	0.00859832	0.00520665	0.0230203	0.00607233	0.00642956	0.00415104	0.0156142	0.573244	0.0148826	0.0108836	0.123499	0.0304226	0.0140124	0.0958532	0.0262854	0.00838507	0.00353032	0.0202267	0.00562295	0.000392563	0.00134782
1	4	F	Serum	Free flow	clot activator	0.5h,RT	stored immediately	until analysis	-80C	reference	none	48	48-A		0.00102589	0.002238	0.0115296	0.00574596	0.0323454	0.00598513	0.0070395	0.00563269	0.0175315	0.545741	0	0.00900692	0.142706	0.0479101	0.0156285	0.0848839	0.0253326	0.0109997	0.00407069	0.0174299	0.00530573	0.00066112	0.00125084
1	4	F	Serum	Free flow	clot activator	0.5h,RT	stored immediately	until analysis	-80C	reference	none	48	48-B		0.000890852	0.00205355	0.0124169	0.00577154	0.0325111	0.00612485	0.00702952	0.00583732	0.0175864	0.550968	0	0.00904917	0.142102	0.0476781	0.0156338	0.0823327	0.0245811	0.0107032	0.00400737	0.016152	0.0047493	0.000591277	0.00123024
2	4	A	Serum	Free flow	clot activator	6h,RT	stored immediately	until analysis	-80C	sample	none	49	49-A		0.00113238	0.00301847	0.0113548	0.00527338	0.031848	0.00565291	0.00667078	0.00555851	0.0184278	0.547802	0	0.0105853	0.141228	0.0399127	0.0159013	0.0845655	0.0296292	0.0101094	0.00448993	0.0180583	0.00671055	0.000856369	0.00121479
2	4	A	Serum	Free flow	clot activator	6h,RT	stored immediately	until analysis	-80C	sample	none	49	49-B		0.00119991	0.00249096	0.0105492	0.0051685	0.0309112	0.00538883	0.00657642	0.00516404	0.018096	0.539941	0	0.0109628	0.139455	0.0405397	0.0158727	0.0881217	0.0302142	0.0107639	0.00466415	0.019904	0.0118822	0.000943726	0.00119054
3	4	B	Serum	Free flow	clot activator	2h,RT	stored immediately	until analysis	-80C	sample	none	50	50-A		0.00109887	0.00237565	0.0112197	0.00503658	0.0316737	0.00578301	0.00688754	0.00544659	0.0173339	0.549908	0	0.0106852	0.140286	0.0406167	0.0159395	0.0850466	0.0294582	0.0101319	0.00457563	0.0177411	0.00666684	0.000851348	0.00123779
3	4	B	Serum	Free flow	clot activator	2h,RT	stored immediately	until analysis	-80C	sample	none	50	50-B		0.00133562	0.00113213	0.00748575	0.00421691	0.0219436	0.00493005	0.00581838	0.0033825	0.0200295	0.544821	0.0131633	0.00946694	0.129506	0.0287261	0.0143732	0.105865	0.0339825	0.0115447	0.00397464	0.0208145	0.011581	0.000773224	0.00113394
4	4	C	Serum	Free flow	clot activator	2h,4C	stored immediately	until analysis	-80C	sample	none	51	51-A		0.00114004	0.00262199	0.0110083	0.0058275	0.0318346	0.00592848	0.00701673	0.00560431	0.0180355	0.541563	0	0.00950899	0.142364	0.0492483	0.0157034	0.0854593	0.0250715	0.011522	0.00445576	0.0184642	0.00532188	0.000713718	0.00158617
4	4	C	Serum	Free flow	clot activator	2h,4C	stored immediately	until analysis	-80C	sample	none	51	51-B		0.00105687	0.00233704	0.01093	0.00564359	0.0309561	0.00581411	0.00698994	0.00550265	0.0174768	0.543324	0	0.00919965	0.14586	0.0501727	0.0156304	0.0843889	0.0251775	0.0113578	0.00420254	0.0168491	0.0051585	0.000663507	0.00130856
5	4	D	Serum	Free flow	clot activator	0.5h,RT	6h,RT	until analysis	-80C	sample	none	56	56-A		0	0.00226654	0.0110801	0.000155859	0.0329919	0.00613362	0.00773727	0.00603853	0.0159038	0.553466	0	0.0154804	0.150835	0.0496374	0.0160052	0.0861593	0.0296659	0.0113435	0.00509916	0	0	0	0
5	4	D	Serum	Free flow	clot activator	0.5h,RT	6h,RT	until analysis	-80C	sample	none	56	56-B		0.00651637	0.00165914	0.0117028	0.000160156	0.0332611	0.00538568	0.00718402	0.00593768	0.0180446	0.565004	0	0.0138666	0.142885	0.0453846	0.0166529	0.0815708	0.0287904	0.0102243	0.00443322	0	0	0.00133704	0
6	4	E	Serum	Free flow	gel	0.5h,RT	6h,RT	until analysis	-80C	sample	none	57	57-A		0	0.00175321	0.0115833	0	0.0329519	0.00582508	0.00739312	0.0064328	0.0168622	0.575845	0	0.0134197	0.14438	0.0461921	0.0159466	0.0786191	0.0278067	0.0101398	0.00433099	0	0	0.000518054	0
6	4	E	Serum	Free flow	gel	0.5h,RT	6h,RT	until analysis	-80C	sample	none	57	57-B		0	0.00276848	0.0104233	0.00527465	0.0313857	0.00521672	0.00684192	0.00565459	0.0179306	0.543991	0	0.0134474	0.14689	0.0477524	0.0157291	0.0847887	0.0290034	0.0111483	0.00459715	0.0165154	0	0.000642126	0
7	4	F	Serum	Free flow	clot activator	0.5h,RT	stored immediately	2 M	-80C	sample	none	55	55-A		0.000600085	0.00289047	0.0104205	0.00608582	0.0289894	0.00556973	0.00707112	0.00544507	0.0155978	0.524102	0	0.0162645	0.144553	0.0486914	0.014152	0.0954927	0.0302119	0.0131235	0.00342095	0.0197434	0.0067286	0	0.000845723
7	4	F	Serum	Free flow	clot activator	0.5h,RT	stored immediately	2 M	-80C	sample	none	55	55-B		0.000508836	0.00260833	0.0105182	0.00525628	0.0298289	0.0050746	0.0067255	0.00530627	0.0179689	0.523193	0	0.0148004	0.146035	0.0477152	0.0145164	0.0924857	0.0301805	0.0123887	0.00346254	0.0212188	0.00780554	0.00154755	0.000855082
8	4	F	Serum	Free flow	clot activator	0.5h,RT	stored immediately	2 M	-20C	sample	none	54	54-A		0.000508349	0.00239312	0.00988212	0.00580601	0.0270811	0.00556666	0.00674987	0.00556912	0.0166268	0.534185	0	0.0135736	0.146089	0.046934	0.0145693	0.0921798	0.0288062	0.0122801	0.00335206	0.0196951	0.00680397	0.000588624	0.000759954
8	4	F	Serum	Free flow	clot activator	0.5h,RT	stored immediately	2 M	-20C	sample	none	54	54-B		0.0005604	0.00231756	0.0102042	0.00539941	0.0271042	0.00468929	0.00697819	0.0054003	0.0179924	0.526799	0	0.0146473	0.146594	0.0478769	0.0146871	0.0905437	0.0325753	0.0121013	0.00390672	0.0201632	0.00785778	0.000773933	0.00082754
9	4	F	Serum	Free flow	clot activator	0.5h,RT	24h,4C	until analysis	-80C	sample	none	52	52-A		0.00110463	0.00248391	0.0111847	0.00517498	0.0321922	0.00545612	0.0066881	0.00544025	0.0185852	0.549843	0	0.0104377	0.141838	0.0410769	0.0157628	0.0823403	0.0286566	0.00990128	0.00428748	0.0160149	0.00974763	0.000711403	0.00107261
9	4	F	Serum	Free flow	clot activator	0.5h,RT	24h,4C	until analysis	-80C	sample	none	52	52-B		0.00126953	0.00215235	0.011013	0.00529184	0.0321348	0.00561333	0.00671069	0.00531368	0.0182199	0.550888	0	0.00974195	0.139822	0.0409581	0.0158755	0.0854246	0.029138	0.0103007	0.00435298	0.0174618	0.00626897	0.000755679	0.00129174
10	4	F	Serum	Free flow	clot activator	0.5h,RT	48h,4C	until analysis	-80C	sample	none	53	53-A		0	0	0.0140524	0.00648652	0.0319398	0.0050982	0.00700699	0.00543902	0.0190404	0.542406	0	0.019287	0.149558	0.0502822	0.0163782	0.0872247	0.0287342	0.012174	0.00489189	0	0	0	0
10	4	F	Serum	Free flow	clot activator	0.5h,RT	48h,4C	until analysis	-80C	sample	none	53	53-B		0	0	0.0138768	0.00632293	0.0312773	0.00529891	0.00713939	0.0055848	0.0176142	0.545298	0	0.0192684	0.150439	0.0515722	0.0166811	0.0849365	0.0278709	0.0119725	0.00484699	0	0	0	0
11	4	H	Plasma	Free flow	citrate	0.5h,RT	stored immediately	until analysis	-80C	reference	none	47	47-A		0.00154214	0.00232757	0.011003	0.00669702	0.0314661	0.00624095	0.00713186	0.00609601	0.0144317	0.55118	0	0.0141945	0.136451	0.0404035	0.0135622	0.0882149	0.0264483	0.0109786	0.00335186	0.019028	0.00713352	0.00124147	0.000876109
11	4	H	Plasma	Free flow	citrate	0.5h,RT	stored immediately	until analysis	-80C	reference	none	47	47-B		0.000789106	0.00214945	0.0103355	0.00618521	0.028867	0.00569273	0.0069217	0.00535204	0.014754	0.546317	0	0.015752	0.135966	0.0422981	0.0138993	0.0908008	0.0266355	0.0120855	0.00297348	0.0216035	0.00796123	0.00156207	0.00109896
12	4	G	Plasma	Vacuum	citrate	0.5h,RT	stored immediately	until analysis	-80C	sample	none	46	46-A		0.000945576	0.00223046	0.00998791	0.00497497	0.0302602	0.00525468	0.00635649	0.00503291	0.0178776	0.550776	0	0.0125636	0.132429	0.0386043	0.0157476	0.0860171	0.0290908	0.0101499	0.00474102	0.0213454	0.0125672	0.00172532	0.00132174
12	4	G	Plasma	Vacuum	citrate	0.5h,RT	stored immediately	until analysis	-80C	sample	none	46	46-B		0.000631073	0.00264505	0.0101842	0	0.030476	0.00507722	0.00617891	0.00512326	0.0168401	0.559089	0	0.0124666	0.131994	0.0387653	0.0157403	0.0853404	0.0283468	0.0101635	0.00446188	0.021001	0.0127903	0.00123887	0.00144555
13	4	I	Plasma	Free flow	EDTA	0.5h,RT	stored immediately	until analysis	-80C	sample	none	59	59-A		0.00467132	0.00236041	0.0115279	0.00609553	0.0293439	0.00464432	0.00627895	0.00486723	0.0179954	0.51962	0	0.0181732	0.144051	0.0505948	0.0152931	0.0871692	0.0292839	0.0126582	0.00496555	0.0207976	0.00760028	0.00124543	0.000763133
13	4	I	Plasma	Free flow	EDTA	0.5h,RT	stored immediately	until analysis	-80C	sample	none	59	59-B		0.00315495	0.00225432	0.01192	0.00591082	0.0294628	0.0047519	0.00639063	0.00518812	0.0175087	0.527864	0	0.0188981	0.142037	0.0471828	0.0155716	0.0867655	0.0283612	0.0122954	0.00513989	0.020126	0.00724685	0.00123347	0.00073531
14	4	J	Plasma	Free flow	Li heparin	0.5h,RT	stored immediately	until analysis	-80C	sample	none	58	58-A		0.000984305	0.00216074	0.0112611	0.00565332	0.0309562	0.00621547	0.00676909	0.00569241	0.0164001	0.564886	0	0.0093482	0.138552	0.0454747	0.0153669	0.0801612	0.0242906	0.010184	0.00391933	0.0155711	0.00433532	0.000567238	0.00125095
14	4	J	Plasma	Free flow	Li heparin	0.5h,RT	stored immediately	until analysis	-80C	sample	none	58	58-B		0.00083474	0.002626	0.00998793	0.00600598	0.0312353	0.00568025	0.00681839	0.00530726	0.0164916	0.551707	0	0.0122242	0.140996	0.0483294	0.015577	0.0823288	0.0220282	0.0113261	0.00432716	0.0188045	0.00440017	0.00103586	0.00192798
15	4	K	Plasma	Free flow	citrate	hemolysis	stored immediately	until analysis	-80C	sample	hemolysis	60	60-A	130	0.00431589	0.00232924	0.011325	0.00653409	0.0329738	0.00653778	0.00730476	0.00615355	0.0138789	0.561277	0	0.0127236	0.131598	0.0414436	0.0155986	0.0822564	0.0224214	0.00995721	0.00404309	0.0196466	0.00499397	0.000925204	0.00176224
15	4	K	Plasma	Free flow	citrate	hemolysis	stored immediately	until analysis	-80C	sample	hemolysis	60	60-B	130	0.00140353	0.00231328	0.0153167	0	0.0331379	0.00569407	0.00719954	0.00569464	0.015412	0.545709	0	0.0194762	0.144701	0.0484617	0.0163491	0.0830935	0.0164691	0.0125499	0.00352359	0.0188602	0	0.00195905	0.00267593
1	5	F	Serum	Free flow	clot activator	0.5h,RT	stored immediately	until analysis	-80C	reference	none	63	63-A		0.000497544	0.000663595	0.0113429	0.00403575	0.0263567	0.00471897	0.00499534	0.00511603	0.0132638	0.515644	0	0.00574047	0.131241	0.0399338	0.0173507	0.160399	0.012736	0.0164127	0.00271387	0.0234317	0.00138852	0.000314885	0.00170299
1	5	F	Serum	Free flow	clot activator	0.5h,RT	stored immediately	until analysis	-80C	reference	none	63	63-B		0.000451004	0.00067464	0.01104	0.00416569	0.0256825	0.00499045	0.00509011	0.00521587	0.0113912	0.519543	0	0.00595703	0.123432	0.0388068	0.0172091	0.165794	0.0131059	0.0162929	0.00271812	0.0248109	0.00142727	0.000344394	0.00185707
2	5	A	Serum	Free flow	clot activator	6h,RT	stored immediately	until analysis	-80C	sample	none	64	64-A		0.000730359	0.000868263	0.0118678	0.00459301	0.0270805	0.00539549	0.00526262	0.00561133	0.012404	0.526233	0	0.00557613	0.130164	0.0373457	0.0163103	0.156475	0.0128225	0.0155077	0.00269801	0.0210643	0	0.000325628	0.00166427
2	5	A	Serum	Free flow	clot activator	6h,RT	stored immediately	until analysis	-80C	sample	none	64	64-B		0.000738204	0.00100534	0.0103648	0.00450528	0.0253334	0.00466347	0.00494073	0.00516144	0.012742	0.50791	0	0.00708762	0.131551	0.0387706	0.0170619	0.164263	0.0119767	0.0182612	0.00290757	0.0273543	0	0.000753192	0.00264874
3	5	B	Serum	Free flow	clot activator	2h,RT	stored immediately	until analysis	-80C	sample	none	65	65-A		0	0.000537224	0.0127681	0.00542825	0.0250248	0.00419545	0.00495647	0.00499527	0.0121863	0.49738	0.0173847	0.014764	0.135791	0.0428658	0.0168948	0.150351	0.0119397	0.0197826	0.00151118	0.0212439	0	0	0
3	5	B	Serum	Free flow	clot activator	2h,RT	stored immediately	until analysis	-80C	sample	none	65	65-B		0	0.000496083	0.0127581	0.00468673	0.0256972	0.00399152	0.00485062	0.00508701	0.0139594	0.50539	0	0.0138591	0.139195	0.042941	0.0174665	0.152569	0.0122694	0.0195942	0.00156067	0.0220882	0.0015407	0	0
4	5	C	Serum	Free flow	clot activator	2h,4C	stored immediately	until analysis	-80C	sample	none	66	66-A		0.000259449	0.000948056	0.0103336	0.000100809	0.024746	0.00429913	0.0047957	0.00522198	0.0135991	0.517425	0	0.0068461	0.128749	0.0378533	0.0177109	0.165654	0.0130938	0.0167015	0.00289772	0.0258865	0	0.000544687	0.00233348
4	5	C	Serum	Free flow	clot activator	2h,4C	stored immediately	until analysis	-80C	sample	none	66	66-B		0.000621108	0.000822976	0.0117796	0.00432523	0.0271325	0.00515419	0.00523945	0.00574196	0.0125942	0.53098	0	0.0056662	0.132914	0.0375553	0.0165127	0.151031	0.0126366	0.0147897	0.00260025	0.0198454	0	0.000335921	0.00172216
5	5	D	Serum	Free flow	clot activator	0.5h,RT	6h,RT	until analysis	-80C	sample	none	71	71-A		0	0.000577635	0.0118693	0.000104089	0.0282168	0.00459856	0.0054864	0.00594873	0.0127372	0.544946	0	0.00936867	0.133181	0.0393864	0.0178043	0.153363	0.0138645	0.0160817	0.00246594	0	0	0	0
5	5	D	Serum	Free flow	clot activator	0.5h,RT	6h,RT	until analysis	-80C	sample	none	71	71-B		0	0.000583657	0.0112099	8.80274e-05	0.0272063	0.00428542	0.00517399	0.00547014	0.013537	0.532456	0	0.00861303	0.137331	0.0404856	0.0182048	0.160781	0.0145871	0.017318	0.00266927	0	0	0	0
6	5	E	Serum	Free flow	gel	0.5h,RT	6h,RT	until analysis	-80C	sample	none	72	72-A		0.000299725	0.000888334	0.0125743	0	0.0259439	0.0040683	0.00478073	0.00532823	0.0120659	0.498059	0.0178556	0.0153968	0.13556	0.0425508	0.0172452	0.149985	0.012168	0.0199139	0.00146487	0.022191	0.00165986	0	0
6	5	E	Serum	Free flow	gel	0.5h,RT	6h,RT	until analysis	-80C	sample	none	72	72-B		0.000267783	0.000619696	0.0123653	0	0.0261639	0.00380682	0.00475489	0.00518006	0.0131911	0.500039	0.0180543	0.0134608	0.135992	0.0423476	0.0173765	0.150319	0.0121806	0.0188192	0.001601	0.0210542	0.00152057	0	0.000886341
7	5	F	Serum	Free flow	clot activator	0.5h,RT	stored immediately	2 M	-80C	sample	none	70	70-A		0.000199589	0.000664251	0.0110112	0.00424141	0.0240716	0.00473573	0.00502609	0.00519023	0.0112117	0.496796	0	0.00976688	0.131033	0.040379	0.0154785	0.174704	0.01358	0.0206645	0.00159877	0.0266031	0.00219116	0	0.000854153
7	5	F	Serum	Free flow	clot activator	0.5h,RT	stored immediately	2 M	-80C	sample	none	70	70-B		0.000201538	0.00062179	0.0101173	0.00397614	0.0232954	0.0042923	0.00487317	0.00494797	0.0117614	0.492924	0	0.0104114	0.131408	0.0420497	0.0160028	0.176047	0.0137268	0.0213549	0.00172327	0.0271605	0.00223333	0	0.000871032
8	5	F	Serum	Free flow	clot activator	0.5h,RT	stored immediately	2 M	-20C	sample	none	69	69-A		0.000467074	0.0010199	0.0101607	0.00433978	0.0198045	0.00450133	0.00488596	0.0051688	0.0111625	0.498944	0	0.00990414	0.13359	0.0405333	0.0156424	0.174501	0.0136316	0.0209594	0.00189849	0.0259723	0.00213909	0	0.000773756
8	5	F	Serum	Free flow	clot activator	0.5h,RT	stored immediately	2 M	-20C	sample	none	69	69-B		0.000241208	0.00101366	0.00936632	0.00430979	0.019191	0.00428765	0.00470217	0.00484386	0.0111212	0.482511	0.0177237	0.0102596	0.131811	0.0403453	0.0152804	0.176049	0.0134418	0.0214023	0.0019552	0.0269924	0.00222797	0	0.000924049
9	5	F	Serum	Free flow	clot activator	0.5h,RT	24h,4C	until analysis	-80C	sample	none	67	67-A		0	0.000630753	0.0104173	5.93419e-05	0.0255144	0.00412844	0.00491062	0.00505281	0.0139333	0.51304	0	0.0090065	0.13519	0.0397949	0.017592	0.160902	0.0142698	0.0179226	0.00255186	0.0223676	0.00167667	0	0.00103928
9	5	F	Serum	Free flow	clot activator	0.5h,RT	24h,4C	until analysis	-80C	sample	none	67	67-B		0.000232764	0.000744633	0.0106218	6.19618e-05	0.0262304	0.00476904	0.00528965	0.00539893	0.0122805	0.521799	0	0.00839215	0.138568	0.0425533	0.0169366	0.151989	0.0137847	0.0168896	0.00260147	0.019429	0.00142736	0	0
10	5	F	Serum	Free flow	clot activator	0.5h,RT	48h,4C	until analysis	-80C	sample	none	68	68-A		0.000288483	0.000664794	0.0117798	0.0051394	0.0240769	0.00374571	0.00474535	0.0051966	0.0121101	0.491225	0.0171947	0.0164592	0.136072	0.0434951	0.0171667	0.152692	0.0127257	0.0207609	0.00156976	0.0206932	0.0015675	0	0.000631779
10	5	F	Serum	Free flow	clot activator	0.5h,RT	48h,4C	until analysis	-80C	sample	none	68	68-B		0.000285677	0.000594818	0.0126759	0.00472552	0.0258449	0.00381681	0.00482452	0.00522161	0.0137489	0.505559	0	0.0138237	0.137373	0.0427151	0.0177647	0.153131	0.0126947	0.0190555	0.00163601	0.0219603	0.00156659	0	0.000981591
11	5	H	Plasma	Free flow	citrate	0.5h,RT	stored immediately	until analysis	-80C	reference	none	62	62-A		0.000552631	0.000973839	0.00970654	0.00545774	0.0259726	0.00496698	0.00514888	0.0052013	0.0114983	0.510153	0	0.0102587	0.134138	0.038237	0.0144503	0.161003	0.0121965	0.0203717	0.00166457	0.0250032	0.00184866	0	0.00119612
11	5	H	Plasma	Free flow	citrate	0.5h,RT	stored immediately	until analysis	-80C	reference	none	62	62-B		0.000342822	0.000664566	0.00988539	0.0045567	0.0248293	0.00453578	0.00487118	0.00513006	0.01172	0.513381	0	0.01166	0.125104	0.0361637	0.0150204	0.167048	0.0119739	0.0199172	0.00152004	0.0280361	0.00207256	0	0.00156716
12	5	G	Plasma	Vacuum	citrate	0.5h,RT	stored immediately	until analysis	-80C	sample	none	61	61-A		0	0.000915154	0.013809	0.00792442	0.0269015	0.00353473	0.00413014	0.00502874	0.0127602	0.463782	0.014211	0.0214307	0.135615	0.0457254	0.0177287	0.156132	0.0116582	0.025799	0.00160834	0.0279077	0.00216944	0	0.00122907
12	5	G	Plasma	Vacuum	citrate	0.5h,RT	stored immediately	until analysis	-80C	sample	none	61	61-B		0.000376163	0.000925258	0.012578	0.00689224	0.0255294	0.00423039	0.00429532	0.00492306	0.0115788	0.475757	0.015215	0.0167452	0.130913	0.0435391	0.0170474	0.161844	0.0124341	0.0230716	0.00152922	0.0273637	0.0021814	0	0.00103208
13	5	I	Plasma	Free flow	EDTA	0.5h,RT	stored immediately	until analysis	-80C	sample	none	74	74-A		0	0	0.00928405	0	0.0243917	0.00396932	0.00451141	0.00472351	0.0129577	0.537504	0	0.00744646	0.127304	0.0329016	0.0180126	0.178545	0.0163207	0.0193323	0.00279524	0	0	0	0
13	5	I	Plasma	Free flow	EDTA	0.5h,RT	stored immediately	until analysis	-80C	sample	none	74	74-B		0.000369198	0	0.00848409	0.00322399	0.0223702	0.00378873	0.00430132	0.00433713	0.01242	0.514348	0	0.00741219	0.123302	0.032579	0.017263	0.176724	0.0159129	0.0194344	0.00279266	0.0309368	0	0	0
14	5	J	Plasma	Free flow	Li heparin	0.5h,RT	stored immediately	until analysis	-80C	sample	none	73	73-A		0.000227919	0.000570382	0.0121426	0.00453857	0.0243557	0.00444049	0.00466659	0.00468305	0.012302	0.504321	0.0166388	0.0143314	0.135426	0.0422512	0.0166082	0.14742	0.0125498	0.0191313	0.00153833	0.0196344	0.00141339	0	0.00080888
14	5	J	Plasma	Free flow	Li heparin	0.5h,RT	stored immediately	until analysis	-80C	sample	none	73	73-B		0.000179867	0.000544446	0.0119563	0.0044652	0.0242434	0.00440254	0.00461697	0.00476166	0.0121137	0.506671	0.0166224	0.014088	0.134429	0.0416828	0.0164551	0.147678	0.0122493	0.0191572	0.00148442	0.0200698	0.0014127	0	0.000716634
15	5	K	Plasma	Free flow	citrate	hemolysis	stored immediately	until analysis	-80C	sample	hemolysis	75	75-A	187	0.00156062	0.00064602	0.0128977	0	0.0304275	0.0041837	0.0046474	0.00552101	0.0107112	0.49174	0.0145867	0.0193382	0.134878	0.042102	0.0171223	0.147109	0.00503339	0.0246615	0.00241068	0.0235217	0	0.00286311	0.00403889
15	5	K	Plasma	Free flow	citrate	hemolysis	stored immediately	until analysis	-80C	sample	hemolysis	75	75-B	187	0.000907634	0.000784296	0.0096512	0.00443702	0.0255317	0.00486844	0.00487066	0.00524304	0.010855	0.520594	0	0.00829472	0.124817	0.0381556	0.0165383	0.162289	0.011317	0.0182035	0.00255137	0.0274514	0	0.000520033	0.00211979
1	6	F	Serum	Free flow	clot activator	0.5h,RT	stored immediately	until analysis	-80C	reference	none	78	78-A		0.00138519	0.00405154	0.00765228	0.000173688	0.0197705	0.00426581	0.00602094	0.005211	0.0194614	0.514767	0.0192787	0.00625138	0.12647	0.0372589	0.0155402	0.136485	0.0268954	0.0149817	0.00343461	0.0238529	0.00571814	0.000297263	0.000776554
1	6	F	Serum	Free flow	clot activator	0.5h,RT	stored immediately	until analysis	-80C	reference	none	78	78-B		0.00111117	0.00414265	0.00727572	0.00542404	0.0193594	0.00456352	0.00622054	0.00537502	0.0174629	0.512129	0.0191549	0.00961618	0.128532	0.0396262	0.0155024	0.132346	0.0252035	0.0128713	0.00377006	0.0236483	0.00526259	0.000203025	0.00120036
2	6	A	Serum	Free flow	clot activator	6h,RT	stored immediately	until analysis	-80C	sample	none	79	79-A		0.00113649	0.00429816	0.00650524	0.00519648	0.0194173	0.00426088	0.00594017	0.00511428	0.0184021	0.498808	0.0187275	0.0105796	0.128327	0.039448	0.015495	0.139589	0.026385	0.0140047	0.00389313	0.0271025	0.00627888	0.000199536	0.00089198
2	6	A	Serum	Free flow	clot activator	6h,RT	stored immediately	until analysis	-80C	sample	none	79	79-B		0.00121928	0.00449364	0.00665677	0.000102913	0.0196764	0.004414	0.00599382	0.00513484	0.0181156	0.502041	0.0189918	0.0100741	0.128839	0.0387675	0.0155588	0.141733	0.0271034	0.0136873	0.00390419	0.0266988	0.00593296	0.000182842	0.000678301
3	6	B	Serum	Free flow	clot activator	2h,RT	stored immediately	until analysis	-80C	sample	none	80	80-A		0.00146055	0.00433048	0.00649213	0.00537001	0.020224	0.00425577	0.00584313	0.00491491	0.0187694	0.495236	0.0178302	0.0123258	0.12519	0.0353174	0.0158368	0.142289	0.0267726	0.0141292	0.00402773	0.0312492	0.00716048	0.000254272	0.000721592
3	6	B	Serum	Free flow	clot activator	2h,RT	stored immediately	until analysis	-80C	sample	none	80	80-B		0.0010905	0.00332896	0.00651479	0.00517872	0.0203393	0.00417132	0.00591043	0.00500567	0.0189233	0.507694	0.0176022	0.0124824	0.128043	0.0374966	0.015691	0.13544	0.025154	0.01358	0.00380023	0.0253701	0.00596341	0.000254432	0.000965416
4	6	C	Serum	Free flow	clot activator	2h,4C	stored immediately	until analysis	-80C	sample	none	81	81-A		0.00077138	0.00336228	0.00637357	0.00516327	0.0212661	0.00393972	0.00592802	0.00514489	0.0193707	0.498295	0.0184364	0.0122151	0.131493	0.039694	0.0159545	0.136035	0.0252893	0.0139015	0.00384654	0.0263394	0.00597383	0.00027885	0.000927649
4	6	C	Serum	Free flow	clot activator	2h,4C	stored immediately	until analysis	-80C	sample	none	81	81-B		0.00106656	0.00430544	0.00627739	0.0053521	0.0197826	0.00422375	0.00574116	0.00493378	0.0177094	0.495272	0.0179122	0.0119145	0.124453	0.0374292	0.0157779	0.142263	0.0266684	0.0143276	0.00395509	0.0315358	0.00771249	0.000326919	0.0010599
5	6	D	Serum	Free flow	clot activator	0.5h,RT	6h,RT	until analysis	-80C	sample	none	86	86-A		0.00108452	0.00333757	0.00726957	0.00545349	0.0196264	0.00466209	0.00620731	0.00555053	0.0178591	0.520403	0.0200875	0.00930596	0.131075	0.0414873	0.0153134	0.124905	0.0235016	0.012124	0.00349415	0.0216792	0.00450585	0.000140859	0.00092602
5	6	D	Serum	Free flow	clot activator	0.5h,RT	6h,RT	until analysis	-80C	sample	none	86	86-B		0.00127946	0.00328044	0.00749507	0.00571655	0.019347	0.00496641	0.00636901	0.00563111	0.0168	0.53149	0.0207193	0.00808467	0.128032	0.0414043	0.015175	0.121544	0.0226495	0.0116152	0.00344885	0.0201047	0.00330779	0.000233486	0.00130542
6	6	E	Serum	Free flow	gel	0.5h,RT	6h,RT	until analysis	-80C	sample	none	87	87-A		0.00127478	0.00378249	0.0069367	0.00550305	0.0189586	0.0045114	0.00621953	0.00530383	0.0172471	0.509669	0.0194263	0.0108168	0.126521	0.0402376	0.0156538	0.135335	0.0257905	0.0134446	0.00375326	0.0236494	0.00507742	0.000156265	0.000730919
6	6	E	Serum	Free flow	gel	0.5h,RT	6h,RT	until analysis	-80C	sample	none	87	87-B		0.00108492	0.00358897	0.00665542	0.00538589	0.0192389	0.00455038	0.00612472	0.00513919	0.0175691	0.508652	0.0191963	0.0108156	0.126872	0.0393701	0.0157105	0.136264	0.0261097	0.0136261	0.00388137	0.0239835	0.00524561	0.000160291	0.000775728
7	6	F	Serum	Free flow	clot activator	0.5h,RT	stored immediately	2 M	-80C	sample	none	85	85-A		0.00150165	0.00446113	0.00671798	0.00585452	0.0191795	0.00473904	0.00631615	0.00546488	0.0166356	0.502147	0.0194134	0.012844	0.132015	0.0432851	0.0149691	0.131652	0.0248459	0.0146924	0.00385507	0.023944	0.00486471	0	0.000602374
7	6	F	Serum	Free flow	clot activator	0.5h,RT	stored immediately	2 M	-80C	sample	none	85	85-B		0.000904451	0.00478992	0.0070509	0.00574887	0.0189223	0.00472006	0.00616027	0.00549322	0.0156072	0.507746	0.0197357	0.0129931	0.128487	0.0418133	0.0151556	0.132188	0.0251232	0.0143191	0.00375521	0.0237303	0.00497092	0	0.000584757
8	6	F	Serum	Free flow	clot activator	0.5h,RT	stored immediately	2 M	-20C	sample	none	84	84-A		0.00102434	0.00430444	0.00688769	0.00579983	0.0179662	0.00492432	0.00635324	0.00560678	0.0156649	0.515382	0.0201593	0.0129087	0.13263	0.0427071	0.0149961	0.124967	0.0238007	0.0136596	0.00360393	0.0216085	0.00438307	0.000101729	0.000559686
8	6	F	Serum	Free flow	clot activator	0.5h,RT	stored immediately	2 M	-20C	sample	none	84	84-B		0.00117951	0.00429981	0.00667156	0.00561142	0.0168388	0.00488192	0.00620368	0.00541513	0.0140779	0.514254	0.0201707	0.0119796	0.127622	0.0425892	0.0152753	0.132279	0.0253896	0.0140795	0.00380319	0.0222053	0.00456471	8.65393e-05	0.000521778
9	6	F	Serum	Free flow	clot activator	0.5h,RT	24h,4C	until analysis	-80C	sample	none	82	82-A		0.00127538	0.00434829	0.00928876	0.00681397	0.0195618	0.0043955	0.00610165	0.00548241	0.0166837	0.498332	0.0186154	0.0144733	0.134342	0.0434557	0.015316	0.130183	0.0241986	0.0147573	0.00426923	0.022383	0.00465725	0.00020231	0.00086312
9	6	F	Serum	Free flow	clot activator	0.5h,RT	24h,4C	until analysis	-80C	sample	none	82	82-B		0.00112646	0.00456865	0.00881492	0.00643886	0.0191074	0.00424716	0.006154	0.00539029	0.0163528	0.496162	0.0188951	0.0144238	0.133101	0.0445437	0.015401	0.132128	0.0247938	0.0152059	0.00426215	0.0229083	0.00483457	0.00022207	0.000918528
10	6	F	Serum	Free flow	clot activator	0.5h,RT	48h,4C	until analysis	-80C	sample	none	83	83-A		0.00109058	0.00348188	0.00944889	0.00675001	0.0200417	0.0042093	0.00616917	0.00543592	0.0181744	0.498707	0.0187961	0.0154426	0.137618	0.0457459	0.0154653	0.124096	0.0229125	0.0147001	0.00403721	0.0220813	0.00448249	0.000239076	0.000875027
10	6	F	Serum	Free flow	clot activator	0.5h,RT	48h,4C	until analysis	-80C	sample	none	83	83-B		0.00117413	0.00438173	0.00912346	0.0063492	0.019747	0.00421751	0.00612151	0.00531136	0.0179612	0.492075	0.0185082	0.0142821	0.134778	0.0449251	0.0153929	0.132027	0.0247782	0.0150948	0.00433796	0.0232979	0.00493537	0.000267679	0.000913217
11	6	H	Plasma	Free flow	citrate	0.5h,RT	stored immediately	until analysis	-80C	reference	none	77	77-A		0.00114671	0.00380135	0.00636557	0.00632211	0.021578	0.00442618	0.00588121	0.00473646	0.0203871	0.508795	0.0160538	0.0119744	0.13027	0.0403277	0.0146882	0.127194	0.021541	0.0137736	0.00378748	0.0287332	0.00505694	0.00097904	0.00218045
11	6	H	Plasma	Free flow	citrate	0.5h,RT	stored immediately	until analysis	-80C	reference	none	77	77-B		0.00118139	0.00378035	0.0061577	0.00575145	0.0203533	0.00448805	0.00581631	0.0048472	0.0189676	0.508955	0.0166934	0.0118091	0.12849	0.0398954	0.0147105	0.12892	0.0225756	0.0139171	0.00390689	0.0295197	0.00593839	0.0013662	0.00195958
12	6	G	Plasma	Vacuum	citrate	0.5h,RT	stored immediately	until analysis	-80C	sample	none	76	76-A		0.00128877	0.00363979	0.00989901	0.00778118	0.0237062	0.00368375	0.00588587	0.00472994	0.0186	0.518025	0.0149665	0.0149889	0.126689	0.0406921	0.0148098	0.123301	0.0177921	0.0143569	0.00274449	0.0275863	0	0.00148361	0.00335009
12	6	G	Plasma	Vacuum	citrate	0.5h,RT	stored immediately	until analysis	-80C	sample	none	76	76-B		0.00135749	0.00363517	0.01024	0.00807058	0.0243393	0.00408994	0.00589929	0.0047375	0.0164376	0.529699	0.0150817	0.0135301	0.120928	0.0392774	0.0143316	0.123065	0.017427	0.013084	0.00339343	0.0268223	0	0.0013879	0.00316654
13	6	I	Plasma	Free flow	EDTA	0.5h,RT	stored immediately	until analysis	-80C	sample	none	89	89-A		0.00409135	0.00361217	0.0056942	0.0052869	0.0192658	0.00387305	0.0056396	0.00470301	0.018963	0.503687	0.0171297	0.0121228	0.12495	0.0371727	0.0151207	0.131029	0.0241558	0.014277	0.00420218	0.0311484	0.0117912	0.00077221	0.00131279
13	6	I	Plasma	Free flow	EDTA	0.5h,RT	stored immediately	until analysis	-80C	sample	none	89	89-B		0.000786099	0.00370301	0.00565544	0.00525653	0.0194644	0.00394016	0.00565989	0.00468813	0.0196913	0.509959	0.0170391	0.0120388	0.130384	0.0387379	0.0150392	0.129394	0.0240314	0.0143304	0.00408884	0.027494	0.00579373	0.00131001	0.0015146
14	6	J	Plasma	Free flow	Li heparin	0.5h,RT	stored immediately	until analysis	-80C	sample	none	88	88-A		0.00111509	0.00314597	0.00705367	0.00559184	0.0197597	0.0050401	0.00633276	0.00527897	0.0177049	0.539593	0.0191889	0.00790793	0.130761	0.0418448	0.0146237	0.116656	0.0210052	0.0114421	0.00351732	0.0198639	0	0.000467829	0.00210544
14	6	J	Plasma	Free flow	Li heparin	0.5h,RT	stored immediately	until analysis	-80C	sample	none	88	88-B		0.00113315	0.00361969	0.00704929	0.00556993	0.0190766	0.00504746	0.00613317	0.00530083	0.0160733	0.535808	0.0192993	0.00763766	0.125312	0.0409793	0.0146651	0.122414	0.0223267	0.0117678	0.00356209	0.0216397	0.00343177	0.000319391	0.0018349
15	6	K	Plasma	Free flow	citrate	hemolysis	stored immediately	until analysis	-80C	sample	hemolysis	90	90-A	596	0.00199926	0.00461023	0.0066699	0.00593716	0.0203008	0.00503639	0.00626888	0.00539064	0.0178884	0.517531	0.0187838	0.00981915	0.129877	0.0416093	0.0143322	0.118966	0.0224406	0.0121215	0.00355544	0.0275622	0.00575624	0.00135764	0.00218689
15	6	K	Plasma	Free flow	citrate	hemolysis	stored immediately	until analysis	-80C	sample	hemolysis	90	90-B	596	0.00193446	0.00515939	0.00728446	0.00667657	0.0209985	0.00514949	0.00649044	0.00545344	0.0172101	0.531286	0.0172149	0.010102	0.1295	0.0430125	0.0140893	0.11366	0.0193207	0.0118309	0.00329448	0.0253521	0	0.00132901	0.00365165
16	6	K	Plasma	Free flow	citrate	hemolysis	stored immediately	until analysis	-80C	sample	hemolysis	151	151-A	136	0.0012833	0.00411753	0.00730498	0.00550213	0.0207464	0.00435637	0.00629067	0.0051644	0.0196823	0.508382	0.0179836	0.0131501	0.13087	0.0424463	0.0153268	0.117889	0.0224426	0.0131125	0.00412896	0.0297912	0.00698368	0.000946749	0.00209849
16	6	K	Plasma	Free flow	citrate	hemolysis	stored immediately	until analysis	-80C	sample	hemolysis	151	151-B	136	0.00133784	0.00408008	0.00727143	0.00533122	0.0198221	0.00436106	0.00612403	0.00500322	0.0186819	0.507527	0.0177022	0.0127852	0.127614	0.0423793	0.0151665	0.118591	0.0227837	0.0132506	0.00429759	0.0299384	0.0123868	0.00165887	0.00190594
1	7	F	Serum	Free flow	clot activator	0.5h,RT	stored immediately	until analysis	-80C	reference	none	93	93-A		0.000763828	0.00119841	0.00924643	0.00444415	0.0315366	0.00495658	0.00585912	0.00576281	0.0211521	0.476097	0.0163492	0.00882544	0.145452	0.0449188	0.0171919	0.15582	0.00372662	0.020761	0.00104627	0.0238512	0	0	0.00104091
1	7	F	Serum	Free flow	clot activator	0.5h,RT	stored immediately	until analysis	-80C	reference	none	93	93-B		0.000722855	0.00116412	0.00939249	0.0043878	0.0311835	0.0048749	0.00582573	0.00565233	0.0210931	0.473967	0.0160849	0.00903718	0.145593	0.0447721	0.0170465	0.156237	0.00366291	0.02098	0.00100239	0.0262493	0	0	0.00107118
2	7	A	Serum	Free flow	clot activator	6h,RT	stored immediately	until analysis	-80C	sample	none	94	94-A		0.000867765	0.00125355	0.00929965	0.00467032	0.0299779	0.00503853	0.00598315	0.00596452	0.0202245	0.479465	0.0171351	0.00944505	0.143933	0.0457692	0.0171042	0.155005	0.00352392	0.0208661	0.000964283	0.022529	0	0	0.000979918
2	7	A	Serum	Free flow	clot activator	6h,RT	stored immediately	until analysis	-80C	sample	none	94	94-B		0.000804524	0.00123656	0.0088374	0.00457078	0.0290866	0.00513628	0.00581557	0.00581914	0.01931	0.47899	0.0167309	0.0095648	0.144413	0.045479	0.0170788	0.156782	0.00362666	0.020851	0.00102577	0.0239781	0	0	0.000862947
3	7	B	Serum	Free flow	clot activator	2h,RT	stored immediately	until analysis	-80C	sample	none	95	95-A		0.00068158	0.00138658	0.0115356	0.00460369	0.0302358	0.00482883	0.00549092	0.00578271	0.0216705	0.470314	0.0161767	0.0097678	0.146304	0.0455111	0.0170997	0.155457	0.00360337	0.0213659	0.000988789	0.0262824	0	0	0.000912387
3	7	B	Serum	Free flow	clot activator	2h,RT	stored immediately	until analysis	-80C	sample	none	95	95-B		0.00038805	0.00108197	0.00941305	0.00455391	0.0311005	0.00531992	0.00589963	0.00602149	0.0209133	0.487624	0.0171677	0.00956978	0.147856	0.0463273	0.0169712	0.145376	0.00346035	0.0194406	0.000898522	0.0198746	0	0	0.00074223
4	7	C	Serum	Free flow	clot activator	2h,4C	stored immediately	until analysis	-80C	sample	none	96	96-A		0.000606296	0.00122432	0.00944972	0	0.0303418	0.00535201	0.00591155	0.00589325	0.0192979	0.485744	0.017449	0.00746553	0.145868	0.0450689	0.0171087	0.155322	0.00394905	0.0197909	0.00101118	0.0226784	0	0	0.000467652
4	7	C	Serum	Free flow	clot activator	2h,4C	stored immediately	until analysis	-80C	sample	none	96	96-B		0.000601287	0.00122732	0.00884981	0.00434832	0.0296572	0.00528844	0.00585602	0.00583039	0.0190313	0.48313	0.017073	0.00821709	0.142336	0.0444143	0.0170833	0.157235	0.00391174	0.0202689	0.00102101	0.0239318	0	0	0.000687634
5	7	D	Serum	Free flow	clot activator	0.5h,RT	6h,RT	until analysis	-80C	sample	none	101	101-A		0.000571018	0.00123563	0.00988399	0.00447851	0.0300821	0.00524526	0.00596652	0.0060231	0.0194888	0.487054	0.0177542	0.00818569	0.144299	0.0465597	0.0170728	0.150739	0.00358894	0.0196445	0.0010208	0.0204593	0	0	0.000646704
5	7	D	Serum	Free flow	clot activator	0.5h,RT	6h,RT	until analysis	-80C	sample	none	101	101-B		0.000374192	0.00123553	0.0102406	0.00448445	0.0293783	0.00525229	0.00594304	0.00594425	0.019588	0.483442	0.0175009	0.00769971	0.144522	0.0469553	0.017198	0.15378	0.00369903	0.0200194	0.00104151	0.0208941	0	0	0.000807745
6	7	E	Serum	Free flow	gel	0.5h,RT	6h,RT	until analysis	-80C	sample	none	102	102-A		0.000201516	0.00101403	0.0105841	0.00425925	0.0305034	0.00530299	0.00621494	0.00641072	0.0182618	0.495327	0.0193654	0.00612208	0.142136	0.0465894	0.017327	0.146168	0.00337241	0.0183737	0.00137918	0.0192523	0	0.000345751	0.00148931
6	7	E	Serum	Free flow	gel	0.5h,RT	6h,RT	until analysis	-80C	sample	none	102	102-B		0.000404456	0.00111897	0.0104307	0.00411836	0.0281237	0.00536737	0.00613028	0.00628487	0.0171835	0.491788	0.0191493	0.00482294	0.141637	0.0468246	0.0172964	0.152722	0.00369144	0.0186218	0.00156376	0.0209702	0	0.000293349	0.00145652
7	7	F	Serum	Free flow	clot activator	0.5h,RT	stored immediately	2 M	-80C	sample	none	100	100-A		0.000321725	0.00115061	0.0103838	0	0.0300864	0.00569738	0.00630612	0.00640857	0.0183661	0.494353	0.0183999	0.00999104	0.147101	0.0485611	0.0166038	0.143635	0.00354058	0.0193916	0.000925858	0.0182698	0	0	0.000507245
7	7	F	Serum	Free flow	clot activator	0.5h,RT	stored immediately	2 M	-80C	sample	none	100	100-B		0.000629326	0.00109954	0.0100484	0.00470358	0.0293118	0.00556146	0.00623334	0.00646059	0.0180482	0.490775	0.0184552	0.0115868	0.146083	0.0478589	0.0168915	0.143795	0.00349644	0.0199382	0.000768457	0.017701	0	0	0.000554047
8	7	F	Serum	Free flow	clot activator	0.5h,RT	stored immediately	2 M	-20C	sample	none	99	99-A		0.000293401	0.00132265	0.00915212	0.00481871	0.0295423	0.00530668	0.00598659	0.00617572	0.0185337	0.477588	0.0177574	0.0108072	0.146947	0.0484826	0.0167528	0.152377	0.0037281	0.0219884	0.000798661	0.0211211	0	0	0.000520092
8	7	F	Serum	Free flow	clot activator	0.5h,RT	stored immediately	2 M	-20C	sample	none	99	99-B		0.00024607	0.00122138	0.00946655	0.00480735	0.0291368	0.00565027	0.00613054	0.00617807	0.0170348	0.488261	0.0181866	0.0105887	0.145898	0.0478712	0.0166875	0.146915	0.00364513	0.0207794	0.00081957	0.0200224	0	0	0.000453035
9	7	F	Serum	Free flow	clot activator	0.5h,RT	24h,4C	until analysis	-80C	sample	none	97	97-A		0.000228248	0.00102808	0.0104338	0.00386567	0.0299675	0.00479566	0.00591627	0.00623021	0.0210215	0.48843	0.0182914	0.00733314	0.144026	0.046746	0.0177465	0.149207	0.0035798	0.0190049	0.00133238	0.0198106	0	0	0.00100491
9	7	F	Serum	Free flow	clot activator	0.5h,RT	24h,4C	until analysis	-80C	sample	none	97	97-B		0.000348508	0.00102029	0.0108515	0.00390363	0.0303176	0.00480156	0.00593248	0.00610571	0.0209308	0.486831	0.0184054	0.0071677	0.144089	0.0458653	0.0179447	0.149756	0.00353586	0.0190443	0.00117808	0.0209307	0	0	0.00104016
10	7	F	Serum	Free flow	clot activator	0.5h,RT	48h,4C	until analysis	-80C	sample	none	98	98-A		0.000464968	0.00111257	0.00985394	0.00434126	0.0296788	0.00493198	0.00585591	0.00600641	0.0212059	0.483641	0.0171438	0.00854013	0.145623	0.0463898	0.0172774	0.15119	0.00352932	0.0199848	0.00105455	0.0213655	0	0	0.000808939
10	7	F	Serum	Free flow	clot activator	0.5h,RT	48h,4C	until analysis	-80C	sample	none	98	98-B		0.000521044	0.00113746	0.00939672	0.00443984	0.029749	0.00505273	0.00583234	0.00588319	0.0212091	0.479719	0.0170521	0.00821382	0.146993	0.0461137	0.0170761	0.153154	0.00350345	0.020335	0.00109747	0.0225894	0	0	0.000931516
11	7	H	Plasma	Free flow	citrate	0.5h,RT	stored immediately	until analysis	-80C	reference	none	92	92-A		0.000839546	0.00104148	0.00929488	0.00522419	0.0336282	0.00483191	0.00550303	0.00553715	0.0211599	0.489239	0.0147047	0.00991838	0.142284	0.0464961	0.0162895	0.141333	0.00238255	0.0196499	0.000883441	0.0251607	0	0.00187193	0.00272615
11	7	H	Plasma	Free flow	citrate	0.5h,RT	stored immediately	until analysis	-80C	reference	none	92	92-B		0.000752649	0.00103005	0.00915428	0.0050217	0.0327157	0.00511174	0.00555888	0.00557787	0.0195406	0.493179	0.014913	0.00910599	0.140002	0.0449017	0.0161501	0.144912	0.00279164	0.0195074	0.000864282	0.0260288	0	0.000883291	0.00229755
12	7	G	Plasma	Vacuum	citrate	0.5h,RT	stored immediately	until analysis	-80C	sample	none	91	91-A		0.000538723	0.00129667	0.00874663	0.00478489	0.0298742	0.00534549	0.00575893	0.00581633	0.0193349	0.491806	0.0162787	0.00980936	0.139949	0.0458745	0.0166806	0.146509	0.00314511	0.0198816	0.000919987	0.0259582	0	0	0.00169213
12	7	G	Plasma	Vacuum	citrate	0.5h,RT	stored immediately	until analysis	-80C	sample	none	91	91-B		0.000640203	0.00127809	0.00863611	0.00476609	0.0300232	0.0051366	0.00566477	0.00571837	0.0197176	0.491186	0.0159095	0.00944419	0.14174	0.0458453	0.0165612	0.145749	0.00301772	0.0197194	0.00100308	0.0258968	0	0.000599275	0.0017476
13	7	I	Plasma	Free flow	EDTA	0.5h,RT	stored immediately	until analysis	-80C	sample	none	104	104-A		0.00343322	0.00113	0.00912339	0.00393708	0.0278781	0.00498097	0.00567269	0.00568164	0.0187401	0.497129	0.0165737	0.00623223	0.140128	0.0422955	0.016706	0.149697	0.00403716	0.0198018	0.00128706	0.0240299	0	0.00031396	0.00119275
13	7	I	Plasma	Free flow	EDTA	0.5h,RT	stored immediately	until analysis	-80C	sample	none	104	104-B		0.00310484	0.00113225	0.0086319	0.00398641	0.0277136	0.00489694	0.00557158	0.00552131	0.0180068	0.492287	0.0160682	0.00835259	0.141558	0.0438164	0.0168074	0.149814	0.00370606	0.0209271	0.00124774	0.0251541	0	0.000384814	0.00131104
14	7	J	Plasma	Free flow	Li heparin	0.5h,RT	stored immediately	until analysis	-80C	sample	none	103	103-A		0.000780804	0.00125672	0.00886116	0.0046023	0.0299535	0.00518945	0.00563791	0.00546912	0.019223	0.488332	0.0153594	0.00968624	0.141317	0.0452504	0.0166654	0.150822	0.00339469	0.0204884	0.00102596	0.0254017	0	0	0.00128259
14	7	J	Plasma	Free flow	Li heparin	0.5h,RT	stored immediately	until analysis	-80C	sample	none	103	103-B		0.000896506	0.00124304	0.00891829	0.00462194	0.0299114	0.0051406	0.00557273	0.00553564	0.0190574	0.487845	0.0153727	0.00968827	0.143081	0.0449367	0.0165696	0.149991	0.00347008	0.0208032	0.000930973	0.0252378	0	0	0.00117632
15	7	K	Plasma	Free flow	citrate	hemolysis	stored immediately	until analysis	-80C	sample	hemolysis	105	105-A	626	0.000632359	0.00129033	0.00946202	0.00498991	0.031461	0.00532068	0.00587031	0.00584832	0.0196834	0.492139	0.0158805	0.00823726	0.146503	0.0467139	0.0159198	0.13855	0.00282957	0.0189979	0.00110854	0.0248131	0	0.00111223	0.00263674
15	7	K	Plasma	Free flow	citrate	hemolysis	stored immediately	until analysis	-80C	sample	hemolysis	105	105-B	626	0.000592635	0.00136939	0.00933931	0.00503676	0.0295743	0.00550482	0.00594485	0.00595364	0.0181676	0.495672	0.0160478	0.0079189	0.144529	0.048072	0.0158838	0.138808	0.00283863	0.0190632	0.0011168	0.0245446	0	0.00114712	0.00287463
16	7	K	Plasma	Free flow	citrate	hemolysis	stored immediately	until analysis	-80C	sample	hemolysis	152	152-A	378	0.000575462	0.0013814	0.0102384	0.00519238	0.0301992	0.00556201	0.00593097	0.00612143	0.0179333	0.492573	0.0169823	0.00894008	0.143653	0.0489117	0.0162314	0.140105	0.00291891	0.0193093	0.0010165	0.023577	0	0.000620975	0.00202631
16	7	K	Plasma	Free flow	citrate	hemolysis	stored immediately	until analysis	-80C	sample	hemolysis	152	152-B	378	0.000615948	0.00134536	0.0106616	0.00522343	0.0300166	0.00544164	0.00592658	0.00611222	0.0175835	0.497618	0.0172003	0.00783269	0.142996	0.0487624	0.015994	0.137658	0.00294527	0.0182829	0.000997154	0.0233656	0	0.000932398	0.00248827
1	8	F	Serum	Free flow	clot activator	0.5h,RT	stored immediately	until analysis	-80C	reference	none	108	108-A		0.000947121	0.00111649	0.0177311	0.00466638	0.0350359	0.00525867	0.00668368	0.00600322	0.0238811	0.476958	0.016899	0.015085	0.135161	0.05437	0.0183398	0.0915452	0.0377988	0.00827403	0.00475559	0.0227927	0.0137363	0.00175788	0.00120282
1	8	F	Serum	Free flow	clot activator	0.5h,RT	stored immediately	until analysis	-80C	reference	none	108	108-B		0.000837931	0.00108421	0.0175915	0.00429256	0.0346235	0.00523593	0.00666286	0.00595486	0.0245617	0.481184	0.0170213	0.01471	0.135741	0.0532876	0.0185758	0.0904396	0.0384246	0.00799562	0.00467841	0.0214514	0.0129197	0.00165281	0.0010738
2	8	A	Serum	Free flow	clot activator	6h,RT	stored immediately	until analysis	-80C	sample	none	109	109-A		0.000926209	0.000964209	0.0155887	0.00469221	0.0342418	0.00507615	0.00664371	0.00598609	0.0236388	0.482107	0.0171295	0.0163498	0.13604	0.0565276	0.0183973	0.0921873	0.037694	0.00814287	0.00489129	0.0190333	0.0114063	0.00134986	0.000985219
2	8	A	Serum	Free flow	clot activator	6h,RT	stored immediately	until analysis	-80C	sample	none	109	109-B		0.00418081	0.00089981	0.0148226	0.00629139	0.0360163	0.00559435	0.00703213	0.00625592	0.0199638	0.495795	0.0175603	0.0153408	0.124992	0.0549179	0.0184278	0.0882501	0.0338912	0.0080285	0.00491548	0.0242368	0.00895459	0.00173323	0.00189869
3	8	B	Serum	Free flow	clot activator	2h,RT	stored immediately	until analysis	-80C	sample	none	110	110-A		0.00111808	0.00103045	0.0181057	0	0.0366258	0.00549497	0.0068042	0.00616908	0.0219527	0.488743	0.0176673	0.0163124	0.128846	0.0517961	0.0187365	0.0919495	0.038831	0.00811317	0.00508202	0.0214289	0.0125093	0.00160174	0.00108223
3	8	B	Serum	Free flow	clot activator	2h,RT	stored immediately	until analysis	-80C	sample	none	110	110-B		0.00109339	0.00106762	0.0168112	0.00469878	0.0350465	0.00533441	0.0064589	0.005947	0.0221983	0.482552	0.0171318	0.0164205	0.128513	0.0506618	0.0186868	0.0943474	0.04046	0.0081796	0.0049417	0.0246932	0.0118093	0.00193821	0.00100816
4	8	C	Serum	Free flow	clot activator	2h,4C	stored immediately	until analysis	-80C	sample	none	111	111-A		0.00110288	0.000994972	0.0144679	0.00479223	0.0366539	0.00539731	0.00660771	0.00624351	0.0241111	0.480416	0.0180581	0.0154989	0.134556	0.0549952	0.0184694	0.0932302	0.0382121	0.00796596	0.00477795	0.0198447	0.0113217	0.00134916	0.000932715
4	8	C	Serum	Free flow	clot activator	2h,4C	stored immediately	until analysis	-80C	sample	none	111	111-B		0.00109279	0.000997472	0.0142912	0.00499795	0.0359392	0.00553308	0.00673933	0.00622485	0.0227285	0.485385	0.0177894	0.0157957	0.133957	0.055181	0.018513	0.0905839	0.0386717	0.00802934	0.00492572	0.0202133	0.0114633	0	0.000947259
5	8	D	Serum	Free flow	clot activator	0.5h,RT	6h,RT	until analysis	-80C	sample	none	116	116-A		0.00105505	0.000953738	0.0167568	0.0048248	0.0353535	0.00566163	0.00695299	0.00675204	0.0227455	0.505669	0.0197556	0.0129024	0.135185	0.058325	0.0180882	0.0809114	0.0330318	0.00715445	0.00410227	0.016249	0.00540931	0.000761936	0.00139774
5	8	D	Serum	Free flow	clot activator	0.5h,RT	6h,RT	until analysis	-80C	sample	none	116	116-B		0.00099298	0.00103838	0.0156783	0.00480674	0.0352003	0.00579132	0.00688303	0.00664227	0.0215897	0.507426	0.0199662	0.0122263	0.132462	0.0573895	0.0183272	0.0837328	0.0343387	0.00721357	0.00398272	0.0163366	0.00590212	0.000807924	0.00126481
6	8	E	Serum	Free flow	gel	0.5h,RT	6h,RT	until analysis	-80C	sample	none	117	117-A		0.00102843	0.00110419	0.0158698	0.00451466	0.0328543	0.00513676	0.00658866	0.00594599	0.0218131	0.481689	0.0170108	0.0161269	0.129263	0.054176	0.0188553	0.0928631	0.0390173	0.00837744	0.00528963	0.0260817	0.0130206	0.00217541	0.00119757
6	8	E	Serum	Free flow	gel	0.5h,RT	6h,RT	until analysis	-80C	sample	none	117	117-B		0.00113866	0.0011278	0.0175457	0.00457755	0.0346323	0.00536565	0.00664307	0.00613469	0.022846	0.48347	0.0176966	0.0145293	0.129706	0.0535826	0.0186811	0.0919678	0.0388746	0.00775235	0.00473044	0.0226091	0.0134607	0.00180966	0.00111816
7	8	F	Serum	Free flow	clot activator	0.5h,RT	stored immediately	2 M	-80C	sample	none	115	115-A		0.000710337	0.00121104	0.0149139	0.00485534	0.0354972	0.00563251	0.00671018	0.0063217	0.0225863	0.481458	0.0188421	0.0138663	0.131677	0.0555264	0.0182137	0.0916049	0.0386283	0.00821178	0.00489013	0.0243765	0.0114004	0.00191359	0.000951601
7	8	F	Serum	Free flow	clot activator	0.5h,RT	stored immediately	2 M	-80C	sample	none	115	115-B		0.00102451	0.00115511	0.0178565	0.00523389	0.034454	0.00585432	0.00695711	0.00636232	0.0195234	0.487845	0.0183961	0.01733	0.133405	0.0563082	0.018208	0.0905321	0.0380236	0.00848326	0.00504077	0.0191099	0.00814045	0	0.000757174
8	8	F	Serum	Free flow	clot activator	0.5h,RT	stored immediately	2 M	-20C	sample	none	114	114-A		0.00114758	0.00110256	0.0162905	0.00532836	0.0364859	0.00625903	0.00732937	0.00727118	0.0201048	0.509014	0	0.0159272	0.135704	0.0585722	0.0186126	0.0862785	0.0373347	0.00766192	0.00455356	0.0166594	0.00694345	0.000765616	0.000653435
8	8	F	Serum	Free flow	clot activator	0.5h,RT	stored immediately	2 M	-20C	sample	none	114	114-B		0.00100985	0.00102461	0.0179338	0.0048995	0.0351783	0.00595063	0.00710726	0.0070749	0.0196719	0.510241	0	0.0168741	0.133072	0.0585474	0.0188496	0.0871671	0.0381349	0.00769426	0.00478226	0.0169142	0.00719743	0	0.000674519
9	8	F	Serum	Free flow	clot activator	0.5h,RT	24h,4C	until analysis	-80C	sample	none	112	112-A		0.000963535	0.000796186	0.0180642	0.0057845	0.0356873	0.00520198	0.00702635	0.00661012	0.0220961	0.488471	0.0181283	0.0187739	0.136791	0.0579734	0.0185813	0.0826666	0.0356334	0.00788451	0.00500697	0.0172081	0.00976792	0	0.000883467
9	8	F	Serum	Free flow	clot activator	0.5h,RT	24h,4C	until analysis	-80C	sample	none	112	112-B		0.00101429	0.000814006	0.018311	0	0.0359935	0.00483346	0.00691614	0.00653814	0.0226526	0.491515	0.0178164	0.0207754	0.140138	0.0575931	0.019112	0.0835779	0.0353845	0.00844148	0	0.0176036	0.010047	0	0.00092213
10	8	F	Serum	Free flow	clot activator	0.5h,RT	48h,4C	until analysis	-80C	sample	none	113	113-A		0.00104875	0.00101592	0.0174312	0.00604505	0.035251	0.0052793	0.00689293	0.00650319	0.0212554	0.479787	0.0175092	0.0186206	0.136901	0.0582616	0.018435	0.0872681	0.0367118	0.00867128	0.00523342	0.0187854	0.010782	0.00128202	0.0010293
10	8	F	Serum	Free flow	clot activator	0.5h,RT	48h,4C	until analysis	-80C	sample	none	113	113-B		0.000858072	0.000915557	0.0174576	0.00624879	0.0345023	0.00504829	0.00707889	0.00662366	0.0205222	0.479226	0.0175711	0.0202608	0.137624	0.0590027	0.0187277	0.0864181	0.0364452	0.00885405	0.00536884	0.0184672	0.0105501	0.00123899	0.000989943
11	8	H	Plasma	Free flow	citrate	0.5h,RT	stored immediately	until analysis	-80C	reference	none	107	107-A		0.00108439	0.00122793	0.0138841	0.00526275	0.0357033	0.00595238	0.00692531	0.00595976	0.0221726	0.506589	0.0164869	0.0145372	0.132083	0.0548147	0.0176328	0.0833449	0.0319353	0.00728599	0.00468261	0.0213039	0.00717064	0.00157785	0.00238206
11	8	H	Plasma	Free flow	citrate	0.5h,RT	stored immediately	until analysis	-80C	reference	none	107	107-B		0.00099595	0.00127065	0.0138608	0.00548853	0.0346294	0.00610068	0.00722367	0.00605327	0.0205762	0.512741	0.0164467	0.0155572	0.130254	0.0545576	0.0173607	0.0824161	0.030915	0.00765796	0.00479963	0.020872	0.00615671	0.00162575	0.00244
12	8	G	Plasma	Vacuum	citrate	0.5h,RT	stored immediately	until analysis	-80C	sample	none	106	106-A		0.00127713	0.00112637	0.0171334	0.00629921	0.0362441	0.00576047	0.00687454	0.00605746	0.020671	0.495287	0.016183	0.0179055	0.1253	0.0508682	0.0177135	0.0890942	0.0334279	0.00832354	0.00539578	0.0248497	0.0103703	0.00188969	0.00194766
12	8	G	Plasma	Vacuum	citrate	0.5h,RT	stored immediately	until analysis	-80C	sample	none	106	106-B		0.00109731	0.0011264	0.0161348	0.00594558	0.0348428	0.00560737	0.00657138	0.00596785	0.021246	0.490207	0.0161017	0.0173423	0.127887	0.052462	0.0174724	0.0882508	0.034366	0.00821084	0.00511739	0.0241739	0.0162255	0.00194309	0.00170139
13	8	I	Plasma	Free flow	EDTA	0.5h,RT	stored immediately	until analysis	-80C	sample	none	119	119-A		0.00432918	0.00106648	0.0140704	0.00435491	0.0343351	0.00523251	0.00643065	0.00566363	0.0235779	0.488843	0.016482	0.0160306	0.130277	0.0521584	0.0176892	0.089282	0.0370492	0.00797264	0.00498511	0.0225663	0.0144396	0.00183199	0.00133257
13	8	I	Plasma	Free flow	EDTA	0.5h,RT	stored immediately	until analysis	-80C	sample	none	119	119-B		0.0048553	0.000931729	0.0150342	0.004351	0.0350185	0.0055779	0.00663717	0.0058946	0.0224119	0.501523	0	0.0162539	0.131148	0.0524228	0.018298	0.0895874	0.037735	0.00779976	0.00487774	0.0220584	0.014372	0.00188198	0.00132939
14	8	J	Plasma	Free flow	Li heparin	0.5h,RT	stored immediately	until analysis	-80C	sample	none	118	118-A		0.00100823	0.000900755	0.0167986	0.00456089	0.0343663	0.00618728	0.00684856	0.00642192	0.0209145	0.523033	0.0183229	0.0127955	0.128604	0.0549271	0.0178291	0.0786407	0.0325968	0.00641557	0.0042324	0.0166372	0.00506217	0.00110493	0.00179172
14	8	J	Plasma	Free flow	Li heparin	0.5h,RT	stored immediately	until analysis	-80C	sample	none	118	118-B		0.000951875	0.000913752	0.0150346	0.00474508	0.0341284	0.00645748	0.00689885	0.00639413	0.0183012	0.524552	0.0188157	0.0128167	0.126021	0.0559951	0.018062	0.0803253	0.0334458	0.00645287	0.00443875	0.0165401	0.00538632	0.00155623	0.00176697
15	8	K	Plasma	Free flow	citrate	hemolysis	stored immediately	until analysis	-80C	sample	hemolysis	120	120-A	722	0.00183007	0.00108417	0.0180234	0.00594857	0.0375907	0.00607933	0.00695267	0.00652602	0.022783	0.500885	0.0176718	0.0138388	0.135562	0.0557745	0.0170631	0.0777324	0.0305879	0.00687033	0.00421655	0.0215961	0.00743315	0.00150284	0.00244726
15	8	K	Plasma	Free flow	citrate	hemolysis	stored immediately	until analysis	-80C	sample	hemolysis	120	120-B	722	0.0021045	0.00111899	0.0147109	0.00580935	0.0370421	0.00637412	0.00704462	0.00642856	0.0217583	0.503156	0.017888	0.0143891	0.134066	0.0564211	0.0171481	0.0780891	0.0314688	0.00683984	0.00418856	0.0216449	0.00838961	0.00162696	0.00229241
16	8	K	Plasma	Free flow	citrate	hemolysis	stored immediately	until analysis	-80C	sample	hemolysis	153	153-A	301	0.00120265	0.000927324	0.0163708	0.00520647	0.0355432	0.00644389	0.00692098	0.00684938	0.0195782	0.500876	0.0197981	0.0133136	0.127253	0.0568349	0.0177717	0.0776712	0.0340175	0.00657143	0.00457976	0.0227024	0.0160099	0.00175163	0.00180574
16	8	K	Plasma	Free flow	citrate	hemolysis	stored immediately	until analysis	-80C	sample	hemolysis	153	153-B	301	0.00115012	0.00112507	0.0159226	0.00531556	0.0361761	0.00640936	0.00701907	0.00691806	0.018747	0.502609	0.0200044	0.0139748	0.125842	0.0567719	0.0178514	0.0788375	0.033654	0.00673313	0.00448852	0.0224618	0.0161889	0	0.00179969
1	9	F	Serum	Free flow	clot activator	0.5h,RT	stored immediately	until analysis	-80C	reference	none	123	123-A		0.000908367	0.000942276	0.0105246	0.007572	0.0224462	0.00475243	0.00576738	0.0034086	0.0181833	0.532128	0.0118591	0.0193116	0.133635	0.0356044	0.0147818	0.102275	0.029535	0.0117307	0.00463372	0.0213322	0.00686968	0.000969933	0.000827843
1	9	F	Serum	Free flow	clot activator	0.5h,RT	stored immediately	until analysis	-80C	reference	none	123	123-B		0.000909375	0.000876518	0.0108179	0.00659389	0.0227062	0.00475327	0.00570604	0.00353404	0.0167591	0.540907	0.0118085	0.0202216	0.129839	0.0342737	0.0152027	0.103858	0.0300044	0.0117132	0	0.0217404	0.00699072	0	0.000784386
2	9	A	Serum	Free flow	clot activator	6h,RT	stored immediately	until analysis	-80C	sample	none	124	124-A		0.0013087	0.00143001	0.00885205	0.00571259	0.0252254	0.00533746	0.00708565	0.00765511	0.0247202	0.483746	0.0198798	0.00938286	0.140126	0.0474372	0.0163816	0.121571	0.0190061	0.00967042	0.00278439	0.0343774	0.00681937	0.000199701	0.00129169
2	9	A	Serum	Free flow	clot activator	6h,RT	stored immediately	until analysis	-80C	sample	none	124	124-B		0.00145841	0.00134382	0.00912762	0.00578653	0.025268	0.00558355	0.00717551	0.00777866	0.0235333	0.486965	0.0205691	0.00794963	0.138423	0.0463795	0.0164605	0.122898	0.0194117	0.00884389	0.00243498	0.0344495	0.00677834	0.000204227	0.00117766
3	9	B	Serum	Free flow	clot activator	2h,RT	stored immediately	until analysis	-80C	sample	none	125	125-A		0.00108359	0.0011411	0.00900578	0.00579086	0.0255311	0.00518188	0.00698006	0.00755456	0.0260342	0.478885	0.020262	0.00946972	0.141814	0.04652	0.0167852	0.121498	0.0193149	0.0096065	0.00285306	0.0362218	0.00714518	0.000228739	0.00109262
3	9	B	Serum	Free flow	clot activator	2h,RT	stored immediately	until analysis	-80C	sample	none	125	125-B		0.00110111	0.00108629	0.00975104	0.00563645	0.0254832	0.00521187	0.00715124	0.00758921	0.0248896	0.48018	0.0202869	0.0108608	0.138901	0.0470041	0.0171145	0.121161	0.0188985	0.0101734	0.00298541	0.0359099	0.00712354	0.000259015	0.00124218
4	9	C	Serum	Free flow	clot activator	2h,4C	stored immediately	until analysis	-80C	sample	none	126	126-A		0.00119306	0.00135339	0.010213	0.00701697	0.0259192	0.00638095	0.00818125	0.00906629	0.0205794	0.50215	0.0237668	0.00732932	0.141889	0.0570117	0.0158743	0.107771	0.0162056	0.00836095	0.00268881	0.022153	0.00251087	0.0002508	0.00213411
4	9	C	Serum	Free flow	clot activator	2h,4C	stored immediately	until analysis	-80C	sample	none	126	126-B		0.000943483	0.00115876	0.00988081	0.00621703	0.0259489	0.00596952	0.00813851	0.00843174	0.0227146	0.503801	0.0224371	0.00747368	0.142148	0.0561342	0.0160445	0.109728	0.0160593	0.00817464	0.00276042	0.0230057	0	0.000306274	0.00252358
5	9	D	Serum	Free flow	clot activator	0.5h,RT	6h,RT	until analysis	-80C	sample	none	131	131-A		0	0.000928832	0.0099124	0.00479129	0.0257187	0.00564333	0.00654618	0.0055138	0.0169589	0.525632	0.0187162	0.00585946	0.141279	0.0433073	0.0153452	0.131287	0.00399032	0.0140797	0.00114497	0.0215305	0.000675964	0.000147151	0.000992122
5	9	D	Serum	Free flow	clot activator	0.5h,RT	6h,RT	until analysis	-80C	sample	none	131	131-B		0.00118417	0.000849717	0.00960809	0.00482317	0.0254239	0.00562218	0.00647187	0.00532618	0.0171448	0.521646	0.0181748	0.00600563	0.141659	0.0435784	0.0154178	0.132876	0.00389759	0.0145161	0.00113507	0.022602	0.000740664	0.000189026	0.00110689
6	9	E	Serum	Free flow	gel	0.5h,RT	6h,RT	until analysis	-80C	sample	none	132	132-A		0.000902325	0.00102692	0.00992699	0.00598842	0.0259748	0.00537114	0.00779732	0.008497	0.0244471	0.49102	0.0227291	0.00817266	0.14442	0.0572789	0.0168404	0.109982	0.0169369	0.00885105	0.00291499	0.0251409	0.00335579	0.000280533	0.00214514
6	9	E	Serum	Free flow	gel	0.5h,RT	6h,RT	until analysis	-80C	sample	none	132	132-B		0.0010083	0.00104298	0.00952038	0.00605115	0.025043	0.0052385	0.00783456	0.00828179	0.0226458	0.493808	0.0220964	0.00820909	0.142548	0.0563825	0.0168904	0.112242	0.0170838	0.0092733	0.00291493	0.0259442	0.00320212	0.000314691	0.00242358
7	9	F	Serum	Free flow	clot activator	0.5h,RT	stored immediately	2 M	-80C	sample	none	130	130-A		0.00112012	0.00133026	0.00904921	0.00657506	0.0241545	0.00602384	0.00785595	0.00829824	0.0200157	0.479002	0.0218323	0.0126262	0.14346	0.0572273	0.0162117	0.119816	0.0185743	0.0110481	0.00273819	0.0276448	0.00474474	8.42455e-05	0.000567061
7	9	F	Serum	Free flow	clot activator	0.5h,RT	stored immediately	2 M	-80C	sample	none	130	130-B		0.00110757	0.0012611	0.00927856	0.00632019	0.0252454	0.00596777	0.00782423	0.00840218	0.021176	0.486281	0.0223313	0.0120107	0.144108	0.0567613	0.0162255	0.115341	0.017982	0.0103206	0.00263092	0.024721	0.00414293	6.64595e-05	0.000495212
8	9	F	Serum	Free flow	clot activator	0.5h,RT	stored immediately	2 M	-20C	sample	none	129	129-A		0.0012554	0.0012001	0.0119722	0.00630414	0.0231232	0.00581491	0.00780709	0.00836867	0.0204153	0.485108	0.0220664	0.0128417	0.142237	0.0559262	0.0163121	0.116938	0.018372	0.0106241	0.00266879	0.0255914	0.00441238	0	0.000640998
8	9	F	Serum	Free flow	clot activator	0.5h,RT	stored immediately	2 M	-20C	sample	none	129	129-B		0.00135765	0.00126237	0.00929534	0.00649106	0.0230783	0.00618051	0.00784967	0.00836172	0.0186649	0.491927	0.0223991	0.0122972	0.14055	0.055273	0.0164453	0.117525	0.0184285	0.0103246	0.0026564	0.0248722	0.00420151	0	0.00055949
9	9	F	Serum	Free flow	clot activator	0.5h,RT	24h,4C	until analysis	-80C	sample	none	127	127-A		0.00131312	0.00129554	0.00957319	0.00558619	0.02517	0.00547809	0.00720707	0.00791448	0.0229444	0.494692	0.0212231	0.00671332	0.13615	0.0467631	0.0165155	0.119975	0.0188572	0.00810107	0.00252559	0.0309799	0.00946362	0	0.00155967
9	9	F	Serum	Free flow	clot activator	0.5h,RT	24h,4C	until analysis	-80C	sample	none	127	127-B		0.00137042	0.00133729	0.00963025	0.00585775	0.0246387	0.00571889	0.00734399	0.00775798	0.0226755	0.48996	0.0206845	0.0081205	0.136955	0.04595	0.0163864	0.122831	0.0193808	0.00877699	0.00258621	0.0338603	0.00684786	0.00019422	0.00113546
10	9	F	Serum	Free flow	clot activator	0.5h,RT	48h,4C	until analysis	-80C	sample	none	128	128-A		0.00124792	0.00126826	0.00936534	0.00596783	0	0.00563928	0.00763759	0.00846863	0.0259765	0.495675	0.022008	0.00880665	0.149352	0.055144	0.0165491	0.120683	0.0189636	0.00956141	0.0026436	0.0285942	0.00526643	0.000128311	0.00105381
10	9	F	Serum	Free flow	clot activator	0.5h,RT	48h,4C	until analysis	-80C	sample	none	128	128-B		0.00109571	0.00127019	0.00938265	0.00601679	0.0253974	0.00563788	0.00759711	0.00821661	0.024218	0.485806	0.0216115	0.00832957	0.144381	0.0539864	0.016191	0.117947	0.0184989	0.00907967	0.00247577	0.026714	0.00493562	0.000121589	0.00108923
11	9	H	Plasma	Free flow	citrate	0.5h,RT	stored immediately	until analysis	-80C	reference	none	122	122-A		0.00139082	0.00131829	0.00862031	0.00650286	0.0262085	0.00567989	0.00721317	0.00755786	0.0241036	0.492652	0.0196287	0.0103767	0.138299	0.0535094	0.0156451	0.11336	0.0158212	0.0096177	0.0027452	0.0316434	0.00462245	0.000824889	0.00265922
11	9	H	Plasma	Free flow	citrate	0.5h,RT	stored immediately	until analysis	-80C	reference	none	122	122-B		0.00145973	0.00130595	0.0110834	0	0.0285572	0.00556616	0.00733394	0.00746928	0.0238285	0.495523	0.0191403	0.0116214	0.140638	0.0552015	0.0154598	0.113559	0.0142951	0.0104445	0.00228739	0.0307532	0	0.00112331	0.00334954
12	9	G	Plasma	Vacuum	citrate	0.5h,RT	stored immediately	until analysis	-80C	sample	none	121	121-A		0.00140359	0.00139647	0.012075	0.00847997	0.0251174	0.00543093	0.0074695	0.00812335	0.0217105	0.478749	0.0196429	0.013883	0.142895	0.0582558	0.0154695	0.111875	0.0157902	0.011218	0.00286154	0.030648	0.00571933	0	0.00178711
12	9	G	Plasma	Vacuum	citrate	0.5h,RT	stored immediately	until analysis	-80C	sample	none	121	121-B		0.00183699	0.00128802	0.0122738	0.00846055	0.0246067	0.00533268	0.00712411	0.0077559	0.0204468	0.47752	0.0195828	0.015222	0.141978	0.0585352	0.0154982	0.113732	0.0160203	0.0117806	0.00200381	0.031382	0.00583291	0	0.00178686
13	9	I	Plasma	Free flow	EDTA	0.5h,RT	stored immediately	until analysis	-80C	sample	none	134	134-A		0.00496511	0.00137402	0.00796103	0.00578579	0.0245728	0.00530772	0.00684007	0.00725819	0.0241609	0.494015	0.0203523	0.00683943	0.139199	0.0517323	0.0158271	0.115494	0.0169577	0.00879431	0.00248962	0.0324948	0.00561565	0.000267599	0.00169601
13	9	I	Plasma	Free flow	EDTA	0.5h,RT	stored immediately	until analysis	-80C	sample	none	134	134-B		0.00490989	0.00128042	0.00800476	0.00585823	0.0246822	0.00537683	0.00675254	0.00717487	0.0232397	0.490009	0.0204145	0.00675232	0.139587	0.0555189	0.0157638	0.115707	0.0168955	0.00939548	0.00248225	0.0326359	0.00563478	0.000259177	0.00166442
14	9	J	Plasma	Free flow	Li heparin	0.5h,RT	stored immediately	until analysis	-80C	sample	none	133	133-A		0.00131632	0.00130825	0.00894888	0.00567497	0.0239705	0.00591026	0.00702668	0.00748794	0.0218259	0.501152	0.0209445	0.00592663	0.137092	0.0506078	0.0158505	0.115529	0.0179857	0.00870711	0.0024326	0.0325374	0.00646825	0.000265372	0.00103044
14	9	J	Plasma	Free flow	Li heparin	0.5h,RT	stored immediately	until analysis	-80C	sample	none	133	133-B		0.00145322	0.00125184	0.00893237	0.00561934	0.0240235	0.0058762	0.00703976	0.00751805	0.0219194	0.497344	0.0210561	0.0051142	0.136296	0.0518773	0.0158249	0.116215	0.0185152	0.010907	0.00225423	0.0332555	0.00652735	0.000346165	0.000834078
15	9	K	Plasma	Free flow	citrate	hemolysis	stored immediately	until analysis	-80C	sample	hemolysis	135	135-A	438	0.00111715	0.00124563	0.0103117	0.00579354	0.0250668	0.00548324	0.00727154	0.00787126	0.0232918	0.486325	0.0206242	0.011317	0.137751	0.0539178	0.0159136	0.110278	0.0171783	0.00964144	0.00283809	0.0338108	0.01065	0.000391462	0.00190951
15	9	K	Plasma	Free flow	citrate	hemolysis	stored immediately	until analysis	-80C	sample	hemolysis	135	135-B	438	0.00122916	0.00131235	0.0107652	0.00629403	0.0271476	0.00572508	0.00752481	0.00801699	0.0220764	0.489694	0.0207298	0.0103385	0.138494	0.0574327	0.0152723	0.109208	0.0156734	0.00977355	0.0029025	0.0315523	0.00451461	0.00149683	0.0028259
16	9	K	Plasma	Free flow	citrate	hemolysis	stored immediately	until analysis	-80C	sample	hemolysis	154	154-A	377	0.00182618	0.00123578	0.00991281	0.00663593	0.0253475	0.00601379	0.00742304	0.00816101	0.022047	0.49565	0.0209036	0.00895565	0.139773	0.0554826	0.0152659	0.108331	0.0161692	0.00880969	0.00239731	0.0310423	0.00511812	0.00117889	0.00232045
16	9	K	Plasma	Free flow	citrate	hemolysis	stored immediately	until analysis	-80C	sample	hemolysis	154	154-B	377	0.00142765	0.00130117	0.0101144	0.00667593	0.0253502	0.00578883	0.00757489	0.00830763	0.0222767	0.492582	0.0207205	0.0107465	0.141725	0.0569187	0.0153526	0.106148	0.0157517	0.00941485	0.00270681	0.0304985	0.00487454	0.00133583	0.00240682
1	10	F	Serum	Free flow	clot activator	0.5h,RT	stored immediately	until analysis	-80C	reference	none	138	138-A		0.00132575	0.00210345	0.00781808	0	0	0.00575191	0.00612516	0.00571956	0.0364898	0.534164	0.0154517	0.0090339	0.137177	0.0394887	0.0142214	0.126108	0.0210841	0.00955887	0.00276581	0.0206872	0.00401611	0.000122747	0.000786499
1	10	F	Serum	Free flow	clot activator	0.5h,RT	stored immediately	until analysis	-80C	reference	none	138	138-B		0.00124047	0.00201571	0.00761197	0.00669709	0	0.00579382	0.00621801	0.00585429	0.0364732	0.53757	0.0156221	0.00922531	0.137266	0.0391157	0.0138356	0.119367	0.0200666	0.00924349	0.00267839	0.0195051	0.00354384	0.00011444	0.000942529
2	10	A	Serum	Free flow	clot activator	6h,RT	stored immediately	until analysis	-80C	sample	none	139	139-A		0.00149794	0.00236098	0.00728781	0.00638669	0.0294401	0.00550521	0.0054864	0.00521736	0.0331171	0.516232	0.0139643	0.00928579	0.123167	0.0325554	0.0141876	0.124925	0.0209193	0.00932	0.00276063	0.0287713	0.00652924	0	0.00108335
2	10	A	Serum	Free flow	clot activator	6h,RT	stored immediately	until analysis	-80C	sample	none	139	139-B		0.00164078	0.00233025	0.00683886	0.00685085	0.0295554	0.00526051	0.00544985	0.00517549	0.0321372	0.515598	0.0139599	0.00935504	0.123194	0.032597	0.0139261	0.12424	0.0208065	0.00953387	0.00280385	0.0286368	0.00892689	0	0.00118279
3	10	B	Serum	Free flow	clot activator	2h,RT	stored immediately	until analysis	-80C	sample	none	140	140-A		0.00135851	0.00215867	0.00730456	0.00608054	0.0293067	0.00521614	0.0056524	0.00515716	0.03366	0.516275	0.014134	0.0100192	0.123145	0.0334504	0.0143284	0.122358	0.0204705	0.00941615	0.00294242	0.0273103	0.00880801	0.000246469	0.00120189
3	10	B	Serum	Free flow	clot activator	2h,RT	stored immediately	until analysis	-80C	sample	none	140	140-B		0.00140924	0.00222012	0.00704029	0.00603786	0.0292201	0.00524219	0.00555205	0.00515728	0.0323837	0.515637	0.0138498	0.0104889	0.12396	0.0333837	0.0143156	0.123322	0.0205727	0.00970956	0.00296541	0.0275009	0.00865531	0.000248474	0.00112771
4	10	C	Serum	Free flow	clot activator	2h,4C	stored immediately	until analysis	-80C	sample	none	141	141-A		0.00145811	0.00216033	0.00701812	0.00622424	0.0299397	0.00514306	0.00546135	0.00516354	0.034218	0.514329	0.0139841	0.00944054	0.124294	0.032226	0.0142697	0.124107	0.0208172	0.00924488	0.00261192	0.027505	0.00885921	0.000226411	0.00129806
4	10	C	Serum	Free flow	clot activator	2h,4C	stored immediately	until analysis	-80C	sample	none	141	141-B		0.00155829	0.00217879	0.00675789	0.00721224	0.0292567	0.00534189	0.00550018	0.00511448	0.0317224	0.518029	0.0138485	0.00961178	0.121409	0.0321712	0.0141747	0.124152	0.0208039	0.00930948	0.00266175	0.0288901	0.00918039	0.000247124	0.000868664
5	10	D	Serum	Free flow	clot activator	0.5h,RT	6h,RT	until analysis	-80C	sample	none	146	146-A		0.00122794	0.00206355	0.00699306	0.00612054	0.0302895	0.00521637	0.00607001	0.00554086	0.0355251	0.525732	0.0150031	0.00905149	0.132714	0.0416347	0.0137971	0.111198	0.0175873	0.00918923	0.00315677	0.0187913	0	0.000899953	0.0021979
5	10	D	Serum	Free flow	clot activator	0.5h,RT	6h,RT	until analysis	-80C	sample	none	146	146-B		0.00144054	0.00222575	0.00698406	0.00628341	0.0287291	0.00536079	0.0061669	0.00566115	0.0314638	0.526172	0.0151073	0.00899427	0.128251	0.0424659	0.0139656	0.115063	0.0180597	0.0094805	0.00335478	0.0210139	0	0.001181	0.00257633
6	10	E	Serum	Free flow	gel	0.5h,RT	6h,RT	until analysis	-80C	sample	none	147	147-A		0.00145244	0.00232362	0.006968	0.00526702	0	0.00539226	0.00566981	0.00535771	0.0336113	0.531966	0.0137019	0.00960489	0.130399	0.0351577	0.0145743	0.127218	0.0215686	0.00965954	0.00296922	0.0298665	0.00628599	0.000170287	0.000815344
6	10	E	Serum	Free flow	gel	0.5h,RT	6h,RT	until analysis	-80C	sample	none	147	147-B		0.0014913	0.00238164	0.00694757	0.00689846	0	0.00541448	0.00565193	0.00544756	0.0334716	0.531743	0.0136106	0.00888433	0.130322	0.0353777	0.0144308	0.127486	0.0213556	0.00941893	0.00283001	0.0270126	0.00845966	0.000178623	0.00118611
7	10	F	Serum	Free flow	clot activator	0.5h,RT	stored immediately	2 M	-80C	sample	none	145	145-A		0.00150381	0.0030799	0.00675008	0.00627652	0.0273488	0.00545994	0.00605794	0.00589923	0.030141	0.513383	0.0157178	0.0129699	0.130967	0.0428526	0.013483	0.120484	0.020237	0.010685	0.00307886	0.0194591	0.003684	0	0.000481349
7	10	F	Serum	Free flow	clot activator	0.5h,RT	stored immediately	2 M	-80C	sample	none	145	145-B		0.00150259	0.00237534	0.00702548	0.0063232	0.0267625	0.00541257	0.00605679	0.00584209	0.0283623	0.519419	0.0160537	0.0124701	0.129724	0.0421626	0.0137187	0.119596	0.0205335	0.0103877	0.00302365	0.0192211	0.0035629	0	0.000463754
8	10	F	Serum	Free flow	clot activator	0.5h,RT	stored immediately	2 M	-20C	sample	none	144	144-A		0.00124438	0.00211708	0.00898132	0.00616382	0.0267763	0.00511927	0.00580163	0.00561967	0.0291814	0.51395	0.0151522	0.0140765	0.127518	0.0396677	0.0145644	0.122243	0.0206184	0.011028	0.00300562	0.0223179	0.00421589	0.000103728	0.000532924
8	10	F	Serum	Free flow	clot activator	0.5h,RT	stored immediately	2 M	-20C	sample	none	144	144-B		0.00107007	0.00202901	0.00671344	0.00639253	0.0255948	0.00543994	0.00573807	0.00559467	0.0259717	0.525927	0.015172	0.014127	0.125023	0.039688	0.01452	0.12205	0.0204937	0.0108621	0.00295386	0.0202901	0.00379669	6.6981e-05	0.000485228
9	10	F	Serum	Free flow	clot activator	0.5h,RT	24h,4C	until analysis	-80C	sample	none	142	142-A		0.00166352	0.00224093	0.00667186	0.00664509	0	0.00551494	0.00627668	0.00557461	0.0388548	0.520694	0.014806	0.0117098	0.137219	0.0392609	0.0143296	0.124376	0.0207876	0.0105354	0.00292214	0.0241906	0.00483581	0.000181487	0.000709172
9	10	F	Serum	Free flow	clot activator	0.5h,RT	24h,4C	until analysis	-80C	sample	none	142	142-B		0.0016897	0.00224384	0.00590808	0.00634707	0.030281	0.0050071	0.00576223	0.00502434	0.0363881	0.493675	0.0126928	0.0134538	0.134362	0.0399428	0.014119	0.122724	0.0193338	0.0116161	0.00319777	0.0283491	0.00588678	0.000966749	0.00102957
10	10	F	Serum	Free flow	clot activator	0.5h,RT	48h,4C	until analysis	-80C	sample	none	143	143-A		0.00131727	0.00200754	0.00745202	0.00636857	0.0308909	0.00556063	0.00606448	0.00569023	0.0355083	0.517987	0.015336	0.00874674	0.1317	0.0388101	0.0134806	0.116079	0.0196622	0.00897214	0.00262136	0.0188656	0.00592278	0.000117731	0.000838046
10	10	F	Serum	Free flow	clot activator	0.5h,RT	48h,4C	until analysis	-80C	sample	none	143	143-B		0.00135392	0.00204273	0.00744429	0.00654771	0.0301271	0.00560178	0.00602938	0.00577264	0.0339278	0.521972	0.0152168	0.00899336	0.132335	0.0399194	0.0133326	0.115015	0.0192307	0.00891821	0.00272439	0.0189017	0.00336312	0.000126105	0.00110362
11	10	H	Plasma	Free flow	citrate	0.5h,RT	stored immediately	until analysis	-80C	reference	none	137	137-A		0.00136205	0.00236826	0.0064884	0.00621352	0.028045	0.00537183	0.00556738	0.00492233	0.0314168	0.525678	0.0138815	0.0080715	0.122705	0.0370519	0.0132884	0.118017	0.0188898	0.00921988	0.00259063	0.0279592	0.0088523	0.000701147	0.00133887
11	10	H	Plasma	Free flow	citrate	0.5h,RT	stored immediately	until analysis	-80C	reference	none	137	137-B		0.00109116	0.00237775	0.00703097	0.00626898	0.0275498	0.00543011	0.00538578	0.004825	0.0303729	0.525179	0.0137915	0.00788636	0.122468	0.0373587	0.0133129	0.11988	0.019273	0.00936253	0.00238248	0.0278684	0.00882079	0.000723713	0.00136111
12	10	G	Plasma	Vacuum	citrate	0.5h,RT	stored immediately	until analysis	-80C	sample	none	136	136-A		0.00138536	0.00207046	0.00660862	0.00627916	0.0283575	0.00511612	0.00565568	0.00500786	0.0323766	0.515132	0.0132078	0.0126252	0.123682	0.0384405	0.0143027	0.116897	0.0194972	0.0103649	0.00325481	0.0281108	0.00968135	0.000374377	0.00157233
12	10	G	Plasma	Vacuum	citrate	0.5h,RT	stored immediately	until analysis	-80C	sample	none	136	136-B		0.00126761	0.00206641	0.00672627	0.00644691	0.0284376	0.00503018	0.00564417	0.00510495	0.0321344	0.516653	0.0134367	0.012426	0.123152	0.0381958	0.0143018	0.116244	0.0194179	0.0101875	0.00328675	0.028217	0.00963278	0.000352574	0.00163743
13	10	I	Plasma	Free flow	EDTA	0.5h,RT	stored immediately	until analysis	-80C	sample	none	149	149-A		0.00453301	0.00232376	0.00615893	0.00675733	0.0273539	0.00534648	0.00546992	0.00496453	0.0309184	0.521745	0.0145873	0.00674376	0.125008	0.0393706	0.0133051	0.118845	0.01977	0.00952524	0.00265549	0.0275003	0.0059949	0.000274673	0.000848733
13	10	I	Plasma	Free flow	EDTA	0.5h,RT	stored immediately	until analysis	-80C	sample	none	149	149-B		0.00714273	0.00224692	0.00608782	0.00642213	0.0273135	0.00532371	0.00529692	0.00490022	0.0311135	0.518199	0.0142316	0.00727697	0.125414	0.0384193	0.0134319	0.118028	0.0192629	0.00942298	0.00294402	0.0271593	0.00846526	0.000817556	0.0010801
14	10	J	Plasma	Free flow	Li heparin	0.5h,RT	stored immediately	until analysis	-80C	sample	none	148	148-A		0.00175788	0.00237014	0.00712623	0.00610009	0.0266898	0.00578092	0.00556985	0.00520003	0.0293416	0.531558	0.0150229	0.00571198	0.122519	0.0377775	0.0133372	0.118765	0.0200695	0.00897299	0.00242794	0.0270244	0.00581092	0.000323069	0.000742664
14	10	J	Plasma	Free flow	Li heparin	0.5h,RT	stored immediately	until analysis	-80C	sample	none	148	148-B		0.001795	0.00329436	0.00721419	0.00623178	0.0254221	0.00583238	0.00546945	0.00534358	0.0261727	0.535815	0.0152247	0.00618169	0.120538	0.0398065	0.0131471	0.116752	0.0194476	0.00898017	0.00250938	0.0260533	0.00791915	0	0.000849972
15	10	K	Plasma	Free flow	citrate	hemolysis	stored immediately	until analysis	-80C	sample	hemolysis	150	150-A	469	0.00202228	0.00260396	0.00669578	0.00704726	0.0301945	0.00593299	0.00613019	0.00588739	0.0315174	0.530612	0.0141343	0.0110541	0.132851	0.0462425	0.0128916	0.100205	0.0143622	0.00938274	0.00317262	0.0222136	0	0.00116292	0.00368276
15	10	K	Plasma	Free flow	citrate	hemolysis	stored immediately	until analysis	-80C	sample	hemolysis	150	150-B	469	0.00263327	0.0027089	0.00678386	0.0083109	0.0302622	0.00603494	0.00618794	0.00588008	0.0291108	0.529451	0.0140655	0.0119497	0.133456	0.0473552	0.0126199	0.0995366	0.0135471	0.00979203	0.00303736	0.0217971	0	0.00153437	0.00394574
16	10	K	Plasma	Free flow	citrate	hemolysis	stored immediately	until analysis	-80C	sample	hemolysis	155	155-A	446	0.00156625	0.00267916	0.00789586	0.00677404	0.0319101	0.0059524	0.00592446	0.00590838	0.0350375	0.522461	0.0152878	0.00962097	0.131423	0.0410961	0.0133158	0.10204	0.0173408	0.0081951	0.0026883	0.0253449	0.00486403	0.000653109	0.00202085
16	10	K	Plasma	Free flow	citrate	hemolysis	stored immediately	until analysis	-80C	sample	hemolysis	155	155-B	446	0.00175046	0.00262295	0.00739581	0.00798455	0.0311649	0.00600252	0.00598262	0.00574277	0.0317598	0.525749	0.0141532	0.0104732	0.130187	0.0412275	0.0129865	0.103786	0.0164054	0.00886333	0.00284108	0.0254878	0.0038972	0.00109015	0.00244688
