# Supplementary material
Source: publisher figshare collection journal article supplement (https://plos.figshare.com/articles/dataset/_/6806699)
Supplement: Supplementary file 1 [file 1 › pone.0200507.s004.pdf]

**S1 Table.** Masses of building blocks used for targeted data extraction by a Python script

|                       | Mass [M +<br>Na <sup>+</sup> ] | Carbons | Hydrogens | Nitrogens | Oxygens | Sulfurs |
|-----------------------|--------------------------------|---------|-----------|-----------|---------|---------|
| <b>Fucose</b>         | 174.089                        | 8       | 14        | 0         | 4       | 0       |
| <b>Hexose</b>         | 204.100                        | 9       | 16        | 0         | 5       | 0       |
| <b>N-acetylhexose</b> | 245.126                        | 11      | 19        | 1         | 5       | 0       |
| <b>Sialic acid</b>    | 361.174                        | 16      | 27        | 1         | 8       | 0       |
| <b>Free end</b>       | 46.0419                        | 2       | 8         | 0         | 1       | 0       |
