# Supplementary material
Source: publisher figshare collection journal article supplement (https://plos.figshare.com/articles/dataset/_/6806699)
Supplement: Supplementary file 1 [file 1 › pone.0200507.s005.pdf]

**S2 Table.** N-Glycans sorted by glycan type

| <b>Glycan type</b>                                  | <b>Structures</b>                                                                                                                          |
|-----------------------------------------------------|--------------------------------------------------------------------------------------------------------------------------------------------|
| <b>Oligomannose</b>                                 | N2H5, N2H6, N2H7, N2H8                                                                                                                     |
| <b>Fucosylated</b>                                  |                                                                                                                                            |
| <b>asialo</b>                                       | N4H3F1, N4H4F1, N4H5F1, N5H4F1, N5H5F1, N5H5F2, N5H6F1                                                                                     |
| <b>Complex capped with sialic acids</b>             | N3H4S1, N3H5S1, N4H4S1, N3H6S1, N4H5S1, N5H5S1, N4H5S2, N5H6S1, N5H5S2, N5H6S2, N5H6S3, N6H7S2, N6H7S3, N6H7S4                             |
| <b>Fucosylated complex capped with sialic acids</b> | N4H5S1F1, N5H5S1F1, N4H5S2F1, N5H6S1F1, N5H5S2F1, N5H6S2F1, N5H6S3F1, N6H7S2F1, N5H6S3F2, N6H7S3F1, N6H7S3F2, N6H7S4F1, N6H7S4F2, N6H7S4F3 |
| <b>Afucosylated neutral complex</b>                 | N3H3, N3H4, N4H3, N4H5, N5H4, N5H5, N5H6                                                                                                   |
