# Supplementary material
Source: publisher figshare collection journal article supplement (https://plos.figshare.com/articles/dataset/_/6806699)
Supplement: Supplementary file 1 [file 1 › pone.0200507.s006.pdf]

**S3 Table.** Results of MALDI-TOF-MS measurements and statistical analysis. Relative intensities of individual N-glycans (median, IQR) were tested for differences between all groups (n=15) (a) by Friedman’s test and p < .05 were considered statistically significant. Only the structures, which were detected as significantly different by Friedman’s test were further analysed by a Wilcoxon’s pot-hoc test to identify whether such differences occurred as a result of deviation from the standard procedure. (b) Wilcoxon’s test was used to compare standard conditions to all the altered conditions for plasma and serum separately. Statistical tests between two non-standard conditions were not performed, since these are not relevant for this study. Nine tests were performed for serum conditions, resulting in a Bonferroni corrected p value of .0056. For plasma conditions five tests were performed, including (c) Wilcoxon’s test where results from only 5 individuals were compared, therefore the Bonferroni corrected p value for plasma samples was .01.

| Structure |                                                                                     |                                                                                     |                         | Friedman's test <sup>a</sup> |                | Wilcoxon's test <sup>b</sup> |                 |            |            |             |               |                   |                      |                      |              |                        |              |            |               |                       | Wilcoxon's test <sup>c</sup> |                       |                          |
|-----------|-------------------------------------------------------------------------------------|-------------------------------------------------------------------------------------|-------------------------|------------------------------|----------------|------------------------------|-----------------|------------|------------|-------------|---------------|-------------------|----------------------|----------------------|--------------|------------------------|--------------|------------|---------------|-----------------------|------------------------------|-----------------------|--------------------------|
| Peak      | Desialylated CFG notation                                                           | CFG notation                                                                        |                         |                              | All conditions |                              | 1<br>Serum ref. | 2<br>6h RT | 3<br>2h RT | 4<br>2h 4°C | 5<br>6h after | 6<br>gel 6h after | 7<br>2 months - 80°C | 8<br>2 months - 20°C | 9<br>24h 4°C | 11<br>Plasma ref. n=10 | 12<br>Vacuum | 13<br>EDTA | 14<br>Heparin | 15<br>Hemolysis water |                              | 11<br>Plasma ref. n=5 | 16<br>Hemolysis combined |
| 1         | 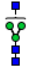   | 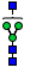   | N3H3<br>m/z<br>1416.6   | Median                       | 0.35           | Median                       | 0.33            | 0.30       | 0.26       | 0.35        | 0.27          | 0.24              | 0.54                 | 0.44                 | 0.37         | 0.45                   | 0.36         | 0.29       | 0.40          | 0.44                  | Median                       | 0.60                  | 0.63                     |
|           |                                                                                     |                                                                                     |                         | IQR                          | 0.23           | IQR                          | 0.19            | 0.12       | 0.13       | 0.28        | 0.24          | 0.20              | 0.22                 | 0.23                 | 0.25         | 0.22                   | 0.23         | 0.23       | 0.19          | 0.28                  | IQR                          | 0.45                  | 0.50                     |
|           |                                                                                     |                                                                                     |                         | χ <sup>2</sup> (14)          | 20.610         | Z                            | -               | -          | -          | 0.44        | 0.40          | 0.33              | 0.77                 | 0.69                 | 0.55         | 0.60                   | 0.66         | 0.47       | 0.63          | 0.49                  | Z                            | -                     | -0.944                   |
|           |                                                                                     |                                                                                     |                         | p value                      | 0.112          | p value                      | -               | -          | -          | -           | -             | -                 | -                    | -                    | -            | -                      | -            | -          | -             | -                     | p value                      | -                     | 0.345                    |
| 2         | 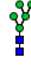   | 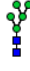   | N2H5<br>m/z<br>1579.7   | Median                       | 2.43           | Median                       | 2.40            | 2.35       | 1.80       | 2.40        | 2.48          | 2.36              | 2.94                 | 3.94                 | 3.70         | 2.17                   | 2.02         | 2.31       | 2.23          | 2.43                  | Median                       | 3.16                  | 4.88                     |
|           |                                                                                     |                                                                                     |                         | IQR                          | 1.31           | IQR                          | 1.18            | 0.97       | 0.87       | 1.59        | 1.68          | 1.20              | 1.86                 | 1.53                 | 1.26         | 1.02                   | 1.30         | 1.12       | 1.36          | 0.99                  | IQR                          | 2.17                  | 4.17                     |
|           |                                                                                     |                                                                                     |                         | χ <sup>2</sup> (14)          | 4.25           | Z                            | -               | -0.255     | -0.968     | -1.070      | -1.274        | -0.561            | -1.988               | -2.191               | -1.784       | -                      | -0.663       | -0.866     | -0.764        | -0.459                | Z                            | -                     | -2.023                   |
|           |                                                                                     |                                                                                     |                         | p value                      | 0.005          | p value                      | -               | 0.799      | 0.333      | 0.285       | 0.203         | 0.575             | 0.047                | 0.028                | 0.074        | -                      | 0.508        | 0.386      | 0.445         | 0.646                 | p value                      | -                     | 0.043                    |
| 3         | 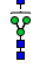   | 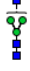   | N3H4<br>m/z<br>1620.7   | Median                       | 0.40           | Median                       | 0.43            | 0.30       | 0.26       | 0.41        | 0.30          | 0.23              | 0.58                 | 0.60                 | 0.38         | 0.47                   | 0.41         | 0.25       | 0.43          | 0.42                  | Median                       | 0.58                  | 0.70                     |
|           |                                                                                     |                                                                                     |                         | IQR                          | 0.22           | IQR                          | 0.24            | 0.13       | 0.12       | 0.27        | 0.21          | 0.18              | 0.37                 | 0.25                 | 0.22         | 0.18                   | 0.21         | 0.22       | 0.22          | 0.29                  | IQR                          | 0.50                  | 0.45                     |
|           |                                                                                     |                                                                                     |                         | χ <sup>2</sup> (14)          | 0.54           | Z                            | -               | 0.54       | 0.44       | 0.55        | 0.42          | 0.45              | 0.74                 | 0.72                 | 0.61         | 0.59                   | 0.66         | 0.40       | 0.52          | 0.58                  | Z                            | -                     | -0.135                   |
|           |                                                                                     |                                                                                     |                         | p value                      | 0.001          | p value                      | -               | 0.333      | 0.013      | 0.878       | 0.093         | 0.009             | 0.114                | 0.333                | 0.721        | -                      | 0.139        | 0.508      | 0.114         | 0.646                 | p value                      | -                     | 0.893                    |
| 4         | 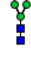   | 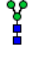   | N4H3<br>m/z<br>1661.8   | Median                       | 0.11           | Median                       | 0.10            | 0.09       | 0.08       | 0.14        | 0.10          | 0.09              | 0.16                 | 0.16                 | 0.10         | 0.12                   | 0.14         | 0.09       | 0.14          | 0.13                  | Median                       | 0.15                  | 0.18                     |
|           |                                                                                     |                                                                                     |                         | IQR                          | 0.08           | IQR                          | 0.08            | 0.02       | 0.04       | 0.07        | 0.08          | 0.07              | 0.09                 | 0.08                 | 0.07         | 0.07                   | 0.08         | 0.09       | 0.06          | 0.08                  | IQR                          | 0.12                  | 0.11                     |
|           |                                                                                     |                                                                                     |                         | χ <sup>2</sup> (14)          | 0.17           | Z                            | -               | -0.866     | -0.663     | -0.255      | -0.866        | -1.478            | -2.090               | -1.376               | -0.051       | -                      | -1.886       | -0.357     | -1.172        | -0.357                | Z                            | -                     | -1.214                   |
|           |                                                                                     |                                                                                     |                         | p value                      | 0.026          | p value                      | -               | 0.386      | 0.508      | 0.799       | 0.386         | 0.139             | 0.037                | 0.169                | 0.959        | -                      | 0.059        | 0.721      | 0.241         | 0.721                 | p value                      | -                     | 0.225                    |
| 5         | 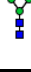  | 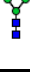  | N2H6<br>m/z<br>1783.8   | Median                       | 2.73           | Median                       | 2.64            | 2.44       | 1.99       | 2.67        | 3.07          | 2.42              | 3.42                 | 3.52                 | 3.80         | 2.07                   | 2.26         | 2.40       | 2.86          | 2.77                  | Median                       | 2.46                  | 5.07                     |
|           |                                                                                     |                                                                                     |                         | IQR                          | 1.65           | IQR                          | 1.72            | 1.41       | 1.30       | 1.80        | 1.99          | 1.70              | 2.28                 | 1.75                 | 1.50         | 1.35                   | 1.76         | 1.50       | 2.04          | 1.49                  | IQR                          | 2.07                  | 3.31                     |
|           |                                                                                     |                                                                                     |                         | χ <sup>2</sup> (14)          | 3.85           | Z                            | -               | 3.64       | 3.68       | 3.76        | 4.51          | 3.96              | 5.56                 | 4.88                 | 5.33         | 2.93                   | 3.66         | 3.16       | 3.96          | 3.39                  | Z                            | -                     | -1.753                   |
|           |                                                                                     |                                                                                     |                         | p value                      | 0.011          | p value                      | -               | 0.799      | 0.285      | 0.241       | 0.139         | 0.575             | 0.037                | 0.037                | 0.139        | -                      | 0.445        | 0.028      | 0.386         | 0.241                 | p value                      | -                     | 0.080                    |
| 6         | 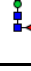 | 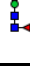 | N4H3F1<br>m/z<br>1835.8 | Median                       | 0.96           | Median                       | 0.80            | 0.96       | 0.76       | 1.01        | 0.95          | 0.92              | 0.91                 | 0.97                 | 1.34         | 1.05                   | 0.93         | 1.00       | 0.79          | 0.84                  | Median                       | 1.38                  | 1.41                     |
|           |                                                                                     |                                                                                     |                         | IQR                          | 0.52           | IQR                          | 0.49            | 0.24       | 0.45       | 0.51        | 0.57          | 0.33              | 0.61                 | 0.61                 | 0.40         | 0.54                   | 0.61         | 0.51       | 0.46          | 0.48                  | IQR                          | 1.12                  | 1.21                     |
|           |                                                                                     |                                                                                     |                         | χ <sup>2</sup> (14)          | 1.50           | Z                            | 1.68            | 1.61       | 1.50       | 1.51        | 1.33          | 1.41              | 1.60                 | 1.43                 | 2.02         | 1.47                   | 1.58         | 1.35       | 1.54          | 1.28                  | Z                            | -                     | -0.674                   |
|           |                                                                                     |                                                                                     |                         | p value                      | 0.549          | p value                      | -               | -          | -          | -           | -             | -                 | -                    | -                    | -            | -                      | -            | -          | -             | -                     | p value                      | -                     | 0.500                    |
| 7         | 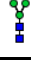 | 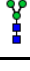 | N3H4S1<br>m/z<br>1981.9 | Median                       | 0.56           | Median                       | 0.62            | 0.46       | 0.41       | 0.62        | 0.40          | 0.44              | 0.80                 | 0.75                 | 0.74         | 0.57                   | 0.52         | 0.56       | 0.54          | 0.72                  | Median                       | 0.76                  | 0.60                     |
|           |                                                                                     |                                                                                     |                         | IQR                          | 0.42           | IQR                          | 0.48            | 0.35       | 0.25       | 0.41        | 0.30          | 0.31              | 0.70                 | 0.48                 | 0.41         | 0.36                   | 0.46         | 0.43       | 0.42          | 0.56                  | IQR                          | 0.55                  | 0.54                     |
|           |                                                                                     |                                                                                     |                         | χ <sup>2</sup> (14)          | 0.78           | Z                            | 0.84            | 0.51       | 0.58       | 1.01        | 0.79          | 0.57              | 0.94                 | 0.82                 | 0.99         | 0.78                   | 0.86         | 0.67       | 0.69          | 0.86                  | Z                            | -                     | -0.405                   |
|           |                                                                                     |                                                                                     |                         | p value                      | 0.005          | p value                      | -               | 0.059      | 0.017      | 0.959       | 0.285         | 0.009             | 0.114                | 0.721                | 0.878        | -                      | 0.241        | 0.333      | 0.799         | 0.508                 | p value                      | -                     | 0.686                    |

| Structure |                              |              |                         | Friedman's test <sup>a</sup> |                   | Wilcoxon's test <sup>b</sup> |                    |               |               |               |               |                   |                         |                         |               |                           |                |                |               |                          | Wilcoxon's test <sup>c</sup> |                          |                             |
|-----------|------------------------------|--------------|-------------------------|------------------------------|-------------------|------------------------------|--------------------|---------------|---------------|---------------|---------------|-------------------|-------------------------|-------------------------|---------------|---------------------------|----------------|----------------|---------------|--------------------------|------------------------------|--------------------------|-----------------------------|
| Peak      | Desialylated<br>CFG notation | CFG notation |                         |                              | All<br>conditions |                              | 1<br>Serum<br>ref. | 2<br>6h RT    | 3<br>2h RT    | 4<br>2h 4°C   | 5<br>6h after | 6<br>gel 6h after | 7<br>2 months -<br>80°C | 8<br>2 months -<br>20°C | 9<br>24h 4°C  | 11<br>Plasma<br>ref. n=10 | 12<br>Vacuum   | 13<br>EDTA     | 14<br>Heparin | 15<br>Hemolysis<br>water |                              | 11<br>Plasma<br>ref. n=5 | 16<br>Hemolysis<br>combined |
| 8         |                              |              | N2H7<br>m/z<br>1987.9   | Median                       | 0.45              | Median                       | 0.39               | 0.42          | 0.41          | 0.50          | 0.56          | 0.40              | 0.64                    | 0.64                    | 0.59          | 0.32                      | 0.40           | 0.39           | 0.49          | 0.37                     | Median                       | 0.35                     | 0.66                        |
|           |                              |              |                         | IQR                          | 0.34<br>0.64      | IQR                          | 0.31<br>0.53       | 0.29<br>0.55  | 0.23<br>0.57  | 0.38<br>0.61  | 0.38<br>0.71  | 0.33<br>0.54      | 0.46<br>0.80            | 0.48<br>0.72            | 0.35<br>0.87  | 0.24<br>0.45              | 0.30<br>0.54   | 0.28<br>0.49   | 0.37<br>0.55  | 0.29<br>0.52             | IQR                          | 0.23<br>0.69             | 0.47<br>0.89                |
|           |                              |              |                         | $\chi^2(14)$                 | 36.470            | Z                            | -                  | -0.051        | -0.255        | -1.172        | -1.580        | -0.357            | -2.395                  | -2.395                  | -1.376        | -                         | -1.886         | -2.191         | -1.172        | -1.886                   | Z                            | -                        | -1.753                      |
|           |                              |              |                         | p value                      | 0.001             | p value                      | -                  | 0.959         | 0.799         | 0.241         | 0.114         | 0.721             | 0.017                   | 0.017                   | 0.169         | -                         | 0.059          | 0.028          | 0.241         | 0.059                    | p value                      | -                        | 0.080                       |
| 9         |                              |              | N4H4F1<br>m/z<br>2039.9 | Median                       | 2.32              | Median                       | 1.89               | 2.21          | 1.93          | 2.33          | 2.34          | 2.21              | 2.51                    | 2.52                    | 2.83          | 2.46                      | 2.13           | 2.29           | 1.84          | 1.91                     | Median                       | 3.16                     | 3.01                        |
|           |                              |              |                         | IQR                          | 1.58<br>3.52      | IQR                          | 1.54<br>3.45       | 0.68<br>3.98  | 1.09<br>3.69  | 1.50<br>3.29  | 1.48<br>3.02  | 1.04<br>3.65      | 1.83<br>3.21            | 1.93<br>2.89            | 0.83<br>4.75  | 1.58<br>3.65              | 1.53<br>4.01   | 1.51<br>2.95   | 1.25<br>3.57  | 1.49<br>3.28             | IQR                          | 2.66<br>5.59             | 2.69<br>7.19                |
|           |                              |              |                         | $\chi^2(14)$                 | 16.650            | Z                            | -                  | -             | -             | -             | -             | -                 | -                       | -                       | -             | -                         | -              | -              | -             | -                        | Z                            | -                        | -0.135                      |
|           |                              |              |                         | p value                      | 0.275             | p value                      | -                  | -             | -             | -             | -             | -                 | -                       | -                       | -             | -                         | -              | -              | -             | -                        | p value                      | -                        | 0.893                       |
| 10        |                              |              | N4H5<br>m/z<br>2070.0   | Median                       | 0.36              | Median                       | 0.32               | 0.30          | 0.30          | 0.38          | 0.33          | 0.28              | 0.50                    | 0.45                    | 0.45          | 0.36                      | 0.34           | 0.34           | 0.31          | 0.33                     | Median                       | 0.44                     | 0.38                        |
|           |                              |              |                         | IQR                          | 0.28<br>0.47      | IQR                          | 0.25<br>0.52       | 0.19<br>0.48  | 0.26<br>0.42  | 0.29<br>0.48  | 0.27<br>0.48  | 0.25<br>0.45      | 0.44<br>0.58            | 0.33<br>0.51            | 0.36<br>0.53  | 0.28<br>0.45              | 0.32<br>0.39   | 0.27<br>0.44   | 0.23<br>0.43  | 0.29<br>0.44             | IQR                          | 0.27<br>0.54             | 0.30<br>0.73                |
|           |                              |              |                         | $\chi^2(14)$                 | 24.310            | Z                            | -                  | -0.968        | -1.070        | -0.561        | -0.357        | -1.580            | -2.090                  | -1.376                  | -0.866        | -                         | -0.459         | -1.376         | -0.561        | -0.561                   | Z                            | -                        | -0.944                      |
|           |                              |              |                         | p value                      | 0.042             | p value                      | -                  | 0.333         | 0.285         | 0.575         | 0.721         | 0.114             | 0.037                   | 0.169                   | 0.386         | -                         | 0.646          | 0.169          | 0.575         | 0.575                    | p value                      | -                        | 0.345                       |
| 11        |                              |              | N5H4<br>m/z<br>2111.0   | Median                       | 0.19              | Median                       | 0.18               | 0.15          | 0.16          | 0.19          | 0.22          | 0.17              | 0.26                    | 0.23                    | 0.25          | 0.16                      | 0.16           | 0.19           | 0.17          | 0.18                     | Median                       | 0.18                     | 0.20                        |
|           |                              |              |                         | IQR                          | 0.14<br>0.26      | IQR                          | 0.16<br>0.25       | 0.13<br>0.27  | 0.13<br>0.23  | 0.14<br>0.26  | 0.13<br>0.32  | 0.14<br>0.26      | 0.19<br>0.40            | 0.17<br>0.31            | 0.17<br>0.37  | 0.12<br>0.25              | 0.13<br>0.23   | 0.13<br>0.23   | 0.16<br>0.27  | 0.13<br>0.23             | IQR                          | 0.16<br>0.37             | 0.17<br>0.46                |
|           |                              |              |                         | $\chi^2(14)$                 | 31.090            | Z                            | -                  | -1.172        | -1.478        | -0.663        | -0.357        | -1.274            | -1.274                  | -0.357                  | -0.663        | -                         | -0.764         | -0.459         | -0.051        | -0.153                   | Z                            | -                        | -1.214                      |
|           |                              |              |                         | p value                      | 0.005             | p value                      | -                  | 0.241         | 0.139         | 0.508         | 0.721         | 0.203             | 0.203                   | 0.721                   | 0.508         | -                         | 0.445          | 0.646          | 0.959         | 0.878                    | p value                      | -                        | 0.225                       |
| 12        |                              |              | N3H5S1<br>m/z<br>2186.0 | Median                       | 0.45              | Median                       | 0.45               | 0.38          | 0.35          | 0.44          | 0.43          | 0.41              | 0.37                    | 0.38                    | 0.53          | 0.51                      | 0.50           | 0.43           | 0.37          | 0.71                     | Median                       | 0.88                     | 0.83                        |
|           |                              |              |                         | IQR                          | 0.34<br>0.58      | IQR                          | 0.39<br>0.59       | 0.30<br>0.59  | 0.30<br>0.59  | 0.36<br>0.61  | 0.34<br>0.51  | 0.29<br>0.50      | 0.34<br>0.44            | 0.33<br>0.48            | 0.38<br>0.61  | 0.44<br>0.90              | 0.33<br>0.85   | 0.31<br>0.49   | 0.27<br>0.49  | 0.55<br>0.89             | IQR                          | 0.51<br>0.96             | 0.70<br>1.14                |
|           |                              |              |                         | $\chi^2(14)$                 | 45.260            | Z                            | -                  | -1.172        | -0.968        | -0.153        | -1.478        | -1.376            | -1.886                  | -1.478                  | -0.357        | -                         | -0.051         | -2.803         | -2.803        | -1.376                   | Z                            | -                        | -0.944                      |
|           |                              |              |                         | p value                      | < 0.0001          | p value                      | -                  | 0.241         | 0.333         | 0.878         | 0.139         | 0.169             | 0.059                   | 0.139                   | 0.721         | -                         | 0.959          | 0.005          | 0.005         | 0.169                    | p value                      | -                        | 0.345                       |
| 13        |                              |              | N2H8<br>m/z<br>2192.0   | Median                       | 0.71              | Median                       | 0.63               | 0.66          | 0.69          | 0.72          | 0.89          | 0.73              | 1.00                    | 0.87                    | 0.93          | 0.46                      | 0.66           | 0.59           | 0.69          | 0.66                     | Median                       | 0.46                     | 0.99                        |
|           |                              |              |                         | IQR                          | 0.53<br>0.99      | IQR                          | 0.48<br>0.81       | 0.44<br>0.77  | 0.36<br>0.90  | 0.57<br>1.02  | 0.56<br>1.09  | 0.50<br>0.87      | 0.79<br>1.10            | 0.72<br>1.14            | 0.58<br>1.29  | 0.38<br>0.61              | 0.47<br>0.80   | 0.51<br>0.78   | 0.58<br>0.89  | 0.42<br>0.82             | IQR                          | 0.38<br>0.94             | 0.73<br>1.31                |
|           |                              |              |                         | $\chi^2(14)$                 | 36.580            | Z                            | -                  | -0.153        | -0.051        | -0.866        | -1.376        | -0.663            | -2.191                  | -2.497                  | -1.580        | -                         | -1.784         | -2.090         | -1.580        | -1.682                   | Z                            | -                        | -2.023                      |
|           |                              |              |                         | p value                      | 0.001             | p value                      | -                  | 0.878         | 0.959         | 0.386         | 0.169         | 0.508             | 0.028                   | 0.013                   | 0.114         | -                         | 0.074          | 0.037          | 0.114         | 0.093                    | p value                      | -                        | 0.043                       |
| 14        |                              |              | N4H4S1<br>m/z<br>2227.0 | Median                       | 0.71              | Median                       | 0.84               | 0.53          | 0.52          | 0.81          | 0.58          | 0.59              | 0.89                    | 0.68                    | 0.79          | 0.79                      | 0.69           | 0.74           | 0.58          | 0.81                     | Median                       | 0.76                     | 0.64                        |
|           |                              |              |                         | IQR                          | 0.54<br>0.89      | IQR                          | 0.57<br>0.93       | 0.41<br>0.75  | 0.48<br>0.69  | 0.37<br>1.07  | 0.33<br>0.91  | 0.36<br>0.79      | 0.71<br>1.06            | 0.58<br>0.86            | 0.58<br>1.01  | 0.63<br>0.90              | 0.59<br>0.97   | 0.54<br>0.91   | 0.48<br>0.72  | 0.67<br>1.25             | IQR                          | 0.60<br>0.96             | 0.49<br>0.94                |
|           |                              |              |                         | $\chi^2(14)$                 | 36.140            | Z                            | -                  | -2.191        | -2.191        | -0.153        | -1.070        | -2.599            | -0.968                  | -0.866                  | -0.255        | -                         | -0.459         | -2.191         | -0.866        | -1.172                   | Z                            | -                        | -0.944                      |
|           |                              |              |                         | p value                      | 0.001             | p value                      | -                  | 0.028         | 0.028         | 0.878         | 0.285         | 0.009             | 0.333                   | 0.386                   | 0.799         | -                         | 0.646          | 0.028          | 0.386         | 0.241                    | p value                      | -                        | 0.345                       |
| 15        |                              |              | N4H5F1<br>m/z<br>2244.0 | Median                       | 1.27              | Median                       | 1.21               | 1.09          | 1.32          | 1.18          | 1.33          | 1.12              | 1.27                    | 1.41                    | 1.45          | 1.39                      | 1.20           | 1.30           | 1.01          | 1.18                     | Median                       | 1.67                     | 1.55                        |
|           |                              |              |                         | IQR                          | 0.99<br>1.80      | IQR                          | 0.95<br>1.71       | 0.69<br>1.98  | 0.91<br>1.84  | 0.89<br>1.95  | 1.06<br>1.49  | 0.96<br>1.78      | 1.21<br>1.87            | 1.26<br>1.57            | 0.84<br>2.35  | 1.08<br>1.85              | 1.07<br>1.92   | 1.02<br>1.69   | 0.74<br>1.56  | 0.97<br>1.62             | IQR                          | 1.39<br>2.43             | 1.33<br>2.81                |
|           |                              |              |                         | $\chi^2(14)$                 | 14.470            | Z                            | -                  | -             | -             | -             | -             | -                 | -                       | -                       | -             | -                         | -              | -              | -             | -                        | Z                            | -                        | -0.405                      |
|           |                              |              |                         | p value                      | 0.415             | p value                      | -                  | -             | -             | -             | -             | -                 | -                       | -                       | -             | -                         | -              | -              | -             | -                        | p value                      | -                        | 0.686                       |
| 16        |                              |              | N5H4F1<br>m/z<br>2285.1 | Median                       | 0.25              | Median                       | 10.78              | 10.06         | 10.09         | 10.55         | 10.97         | 11.22             | 11.88                   | 11.35                   | 11.52         | 11.58                     | 11.78          | 12.16          | 11.13         | 12.82                    | Median                       | 0.25                     | 0.25                        |
|           |                              |              |                         | IQR                          | 0.20<br>0.32      | IQR                          | 9.55<br>11.88      | 9.62<br>10.80 | 9.23<br>12.02 | 9.14<br>12.62 | 9.41<br>13.52 | 9.50<br>12.30     | 9.81<br>12.52           | 9.46<br>12.47           | 9.79<br>13.87 | 10.47<br>13.92            | 10.71<br>13.63 | 10.78<br>14.52 | 9.90<br>13.15 | 10.90<br>13.95           | IQR                          | 0.18<br>0.36             | 0.22<br>0.34                |
|           |                              |              |                         | $\chi^2(14)$                 | 33.570            | Z                            | -                  | -1.478        | -1.274        | -1.376        | -0.051        | -1.682            | -1.886                  | -1.376                  | -0.357        | -                         | -0.051         | -0.051         | -0.866        | -0.153                   | Z                            | -                        | -0.405                      |
|           |                              |              |                         | p value                      | 0.002             | p value                      | -                  | 0.139         | 0.203         | 0.169         | 0.959         | 0.093             | 0.059                   | 0.169                   | 0.721         | -                         | 0.959          | 0.959          | 0.386         | 0.878                    | p value                      | -                        | 0.686                       |

| Structure |                              |              |                           | Friedman's test <sup>a</sup> |                   | Wilcoxon's test <sup>b</sup> |                    |              |              |              |               |                   |                         |                         |              |                           |              |              |               |                          | Wilcoxon's test <sup>c</sup> |                          |                             |
|-----------|------------------------------|--------------|---------------------------|------------------------------|-------------------|------------------------------|--------------------|--------------|--------------|--------------|---------------|-------------------|-------------------------|-------------------------|--------------|---------------------------|--------------|--------------|---------------|--------------------------|------------------------------|--------------------------|-----------------------------|
| Peak      | Desialylated<br>CFG notation | CFG notation |                           |                              | All<br>conditions |                              | 1<br>Serum<br>ref. | 2<br>6h RT   | 3<br>2h RT   | 4<br>2h 4°C  | 5<br>6h after | 6<br>gel 6h after | 7<br>2 months -<br>80°C | 8<br>2 months -<br>20°C | 9<br>24h 4°C | 11<br>Plasma<br>ref. n=10 | 12<br>Vacuum | 13<br>EDTA   | 14<br>Heparin | 15<br>Hemolysis<br>water |                              | 11<br>Plasma<br>ref. n=5 | 16<br>Hemolysis<br>combined |
| 17        |                              |              | N5H5<br>m/z<br>2315.1     | Median                       | 0.06              | Median                       | 0.06               | 0.07         | 0.05         | 0.07         | 0.06          | 0.07              | 0.07                    | 0.07                    | 0.08         | 0.07                      | 0.05         | 0.06         | 0.06          | 0.06                     | Median                       | 0.06                     | 0.09                        |
|           |                              |              |                           | IQR                          | 0.05<br>0.09      | IQR                          | 0.04<br>0.09       | 0.05<br>0.09 | 0.04<br>0.08 | 0.05<br>0.14 | 0.05<br>0.09  | 0.05<br>0.09      | 0.05<br>0.11            | 0.06<br>0.09            | 0.05<br>0.11 | 0.04<br>0.10              | 0.05<br>0.08 | 0.04<br>0.11 | 0.04<br>0.08  | 0.04<br>0.08             | IQR                          | 0.04<br>0.09             | 0.05<br>0.12                |
|           |                              |              |                           | $\chi^2(14)$                 | 13.080            | Z                            | -                  | -            | -            | -            | -             | -                 | -                       | -                       | -            | -                         | -            | -            | -             | -                        | Z                            | -                        | -1.753                      |
|           |                              |              |                           | p value                      | 0.520             | p value                      | -                  | -            | -            | -            | -             | -                 | -                       | -                       | -            | -                         | -            | -            | -             | -                        | p value                      | -                        | 0.080                       |
| 18        |                              |              | N3H6S1<br>m/z<br>2390.1   | Median                       | 0.07              | Median                       | 0.06               | 0.07         | 0.05         | 0.08         | 0.08          | 0.08              | 0.07                    | 0.07                    | 0.08         | 0.06                      | 0.05         | 0.06         | 0.06          | 0.08                     | Median                       | 0.05                     | 0.08                        |
|           |                              |              |                           | IQR                          | 0.05<br>0.09      | IQR                          | 0.05<br>0.09       | 0.04<br>0.10 | 0.04<br>0.09 | 0.05<br>0.12 | 0.06<br>0.09  | 0.05<br>0.09      | 0.06<br>0.09            | 0.05<br>0.08            | 0.05<br>0.11 | 0.04<br>0.08              | 0.04<br>0.09 | 0.04<br>0.09 | 0.05<br>0.08  | 0.06<br>0.10             | IQR                          | 0.04<br>0.08             | 0.06<br>0.12                |
|           |                              |              |                           | $\chi^2(14)$                 | 16.390            | Z                            | -                  | -            | -            | -            | -             | -                 | -                       | -                       | -            | -                         | -            | -            | -             | -                        | Z                            | -                        | -1.753                      |
|           |                              |              |                           | p value                      | 0.290             | p value                      | -                  | -            | -            | -            | -             | -                 | -                       | -                       | -            | -                         | -            | -            | -             | -                        | p value                      | -                        | 0.080                       |
| 19        |                              |              | N4H5S1<br>m/z<br>2431.1   | Median                       | 11.11             | Median                       | 1.21               | 1.09         | 1.32         | 1.18         | 1.33          | 1.12              | 1.27                    | 1.41                    | 1.45         | 1.39                      | 1.20         | 1.30         | 1.01          | 1.18                     | Median                       | 11.76                    | 11.31                       |
|           |                              |              |                           | IQR                          | 9.91<br>12.82     | IQR                          | 0.95<br>1.71       | 0.69<br>1.98 | 0.91<br>1.84 | 0.89<br>1.95 | 1.06<br>1.49  | 0.96<br>1.78      | 1.21<br>1.87            | 1.26<br>1.57            | 0.84<br>2.35 | 1.08<br>1.85              | 1.07<br>1.92 | 1.02<br>1.69 | 0.74<br>1.56  | 0.97<br>1.62             | IQR                          | 10.38<br>14.56           | 11.09<br>14.32              |
|           |                              |              |                           | $\chi^2(14)$                 | 28.140            | Z                            | -                  | -1.478       | -0.663       | -0.561       | -1.070        | -1.172            | -0.866                  | -0.153                  | -1.376       |                           | -0.663       | -0.866       | -0.153        | -0.051                   | Z                            | -                        | -0.135                      |
|           |                              |              |                           | p value                      | 0.014             | p value                      | -                  | 0.139        | 0.508        | 0.575        | 0.285         | 0.241             | 0.386                   | 0.878                   | 0.169        |                           | 0.508        | 0.386        | 0.878         | 0.959                    | p value                      | -                        | 0.893                       |
| 20        |                              |              | N5H5F1<br>m/z<br>2489.1   | Median                       | 0.18              | Median                       | 0.20               | 0.13         | 0.18         | 0.19         | 0.18          | 0.18              | 0.19                    | 0.24                    | 0.25         | 0.18                      | 0.17         | 0.20         | 0.13          | 0.19                     | Median                       | 0.12                     | 0.16                        |
|           |                              |              |                           | IQR                          | 0.12<br>0.24      | IQR                          | 0.10<br>0.25       | 0.09<br>0.31 | 0.11<br>0.22 | 0.09<br>0.28 | 0.13<br>0.28  | 0.12<br>0.24      | 0.11<br>0.30            | 0.11<br>0.31            | 0.16<br>0.30 | 0.11<br>0.21              | 0.14<br>0.21 | 0.11<br>0.23 | 0.10<br>0.22  | 0.11<br>0.23             | IQR                          | 0.08<br>0.19             | 0.10<br>0.19                |
|           |                              |              |                           | $\chi^2(14)$                 | 20.570            | Z                            | -                  | -            | -            | -            | -             | -                 | -                       | -                       | -            | -                         | -            | -            | -             | -                        | Z                            | -                        | -0.674                      |
|           |                              |              |                           | p value                      | 0.113             | p value                      | -                  | -            | -            | -            | -             | -                 | -                       | -                       | -            | -                         | -            | -            | -             | -                        | p value                      | -                        | 0.500                       |
| 21        |                              |              | N5H6<br>m/z<br>2519.1     | Median                       | 0.01              | Median                       | 0.01               | 0.02         | 0.01         | 0.01         | 0.02          | 0.02              | 0.02                    | 0.02                    | 0.01         | 0.01                      | 0.01         | 0.01         | 0.02          | 0.01                     | Median                       | 0.01                     | 0.02                        |
|           |                              |              |                           | IQR                          | 0.01<br>0.03      | IQR                          | 0.00<br>0.02       | 0.01<br>0.03 | 0.01<br>0.02 | 0.00<br>0.03 | 0.01<br>0.03  | 0.01<br>0.03      | 0.00<br>0.03            | 0.01<br>0.03            | 0.01<br>0.03 | 0.01<br>0.03              | 0.00<br>0.03 | 0.01<br>0.04 | 0.00<br>0.04  | 0.00<br>0.02             | IQR                          | 0.01<br>0.03             | 0.00<br>0.03                |
|           |                              |              |                           | $\chi^2(14)$                 | 10.740            | Z                            | -                  | -            | -            | -            | -             | -                 | -                       | -                       | -            | -                         | -            | -            | -             | -                        | Z                            | -                        | -0.135                      |
|           |                              |              |                           | p value                      | 0.706             | p value                      | -                  | -            | -            | -            | -             | -                 | -                       | -                       | -            | -                         | -            | -            | -             | -                        | p value                      | -                        | 0.893                       |
| 22        |                              |              | N4H5S1F1<br>m/z<br>2605.2 | Median                       | 2.52              | Median                       | 2.54               | 2.37         | 2.51         | 2.58         | 2.64          | 2.59              | 2.63                    | 2.69                    | 2.32         | 2.25                      | 2.37         | 2.51         | 2.21          | 2.55                     | Median                       | 2.14                     | 1.90                        |
|           |                              |              |                           | IQR                          | 1.98<br>2.86      | IQR                          | 1.88<br>3.02       | 1.75<br>2.91 | 2.13<br>2.83 | 1.98<br>2.65 | 2.08<br>2.99  | 1.99<br>2.86      | 1.96<br>3.11            | 1.86<br>3.24            | 2.10<br>3.30 | 2.07<br>2.84              | 1.95<br>2.58 | 1.97<br>2.89 | 1.77<br>2.73  | 1.94<br>3.04             | IQR                          | 1.80<br>2.77             | 1.68<br>2.74                |
|           |                              |              |                           | $\chi^2(14)$                 | 21.870            | Z                            | -                  | -            | -            | -            | -             | -                 | -                       | -                       | -            | -                         | -            | -            | -             | -                        | Z                            |                          | -1.214                      |
|           |                              |              |                           | p value                      | 0.081             | p value                      | -                  | -            | -            | -            | -             | -                 | -                       | -                       | -            | -                         | -            | -            | -             | -                        | p value                      |                          | 0.225                       |
| 23        |                              |              | N5H5F2<br>m/z<br>2663.2   | Median                       | 0.30              | Median                       | 0.40               | 0.34         | 0.37         | 0.27         | 0.27          | 0.28              | 0.15                    | 0.16                    | 0.27         | 0.57                      | 0.40         | 0.28         | 0.22          | 0.70                     | Median                       | 0.55                     | 0.41                        |
|           |                              |              |                           | IQR                          | 0.19<br>0.44      | IQR                          | 0.26<br>0.45       | 0.23<br>0.44 | 0.20<br>0.41 | 0.14<br>0.35 | 0.20<br>0.31  | 0.20<br>0.33      | 0.14<br>0.20            | 0.12<br>0.22            | 0.20<br>0.34 | 0.44<br>0.68              | 0.22<br>0.70 | 0.14<br>0.43 | 0.18<br>0.40  | 0.56<br>0.74             | IQR                          | 0.41<br>0.73             | 0.41<br>0.52                |
|           |                              |              |                           | $\chi^2(14)$                 | 54.310            | Z                            | -                  | -1.376       | -0.459       | -1.886       | -2.191        | -1.376            | -2.497                  | -1.682                  | -1.682       | -                         | -0.968       | -2.803       | -2.599        | -1.274                   | Z                            | -                        | -1.214                      |
|           |                              |              |                           | p value                      | < 0.0001          | p value                      | -                  | 0.169        | 0.646        | 0.059        | 0.028         | 0.169             | 0.013                   | 0.093                   | 0.093        | -                         | 0.333        | 0.005        | 0.009         | 0.203                    | p value                      | -                        | 0.225                       |
| 24        |                              |              | N5H5S1<br>m/z<br>2676.2   | Median                       | 0.58              | Median                       | 0.63               | 0.50         | 0.64         | 0.52         | 0.53          | 0.64              | 0.62                    | 0.63                    | 0.64         | 0.55                      | 0.54         | 0.61         | 0.53          | 0.58                     | Median                       | 0.51                     | 0.43                        |
|           |                              |              |                           | IQR                          | 0.43<br>0.88      | IQR                          | 0.41<br>0.95       | 0.46<br>0.81 | 0.40<br>0.78 | 0.29<br>0.94 | 0.43<br>0.88  | 0.40<br>0.86      | 0.45<br>0.98            | 0.43<br>0.96            | 0.50<br>0.85 | 0.39<br>0.95              | 0.44<br>0.78 | 0.43<br>0.80 | 0.41<br>0.70  | 0.46<br>0.97             | IQR                          | 0.39<br>0.83             | 0.36<br>0.78                |
|           |                              |              |                           | $\chi^2(14)$                 | 20.800            | Z                            | -                  | -            | -            | -            | -             | -                 | -                       | -                       | -            | -                         | -            | -            | -             | -                        | Z                            | -                        | -0.405                      |
|           |                              |              |                           | p value                      | 0.107             | p value                      | -                  | -            | -            | -            | -             | -                 | -                       | -                       | -            | -                         | -            | -            | -             | -                        | p value                      | -                        | 0.686                       |
| 25        |                              |              | N5H6F1<br>m/z<br>2693.2   | Median                       | 0.02              | Median                       | 0.02               | 0.01         | 0.01         | 0.01         | 0.02          | 0.02              | 0.01                    | 0.02                    | 0.03         | 0.03                      | 0.01         | 0.02         | 0.03          | 0.01                     | Median                       | 0.02                     | 0.03                        |
|           |                              |              |                           | IQR                          | 0.01<br>0.03      | IQR                          | 0.01<br>0.03       | 0.01<br>0.02 | 0.01<br>0.02 | 0.01<br>0.02 | 0.01<br>0.03  | 0.01<br>0.04      | 0.00<br>0.03            | 0.01<br>0.04            | 0.01<br>0.04 | 0.01<br>0.04              | 0.00<br>0.02 | 0.01<br>0.03 | 0.01<br>0.03  | 0.01<br>0.02             | IQR                          | 0.01<br>0.04             | 0.01<br>0.04                |
|           |                              |              |                           | $\chi^2(14)$                 | 15.930            | Z                            | -                  | -            | -            | -            | -             | -                 | -                       | -                       | -            | -                         | -            | -            | -             | -                        | Z                            | -                        | -0.405                      |
|           |                              |              |                           | p value                      | 0.318             | p value                      | -                  | -            | -            | -            | -             | -                 | -                       | -                       | -            | -                         | -            | -            | -             | -                        | p value                      | -                        | 0.686                       |

| Structure |                              |              |                           | Friedman's test <sup>a</sup> |                   | Wilcoxon's test <sup>b</sup> |                    |                |                |                |                |                   |                         |                         |                |                           |                |                |                |                          | Wilcoxon's test <sup>c</sup> |                          |                             |
|-----------|------------------------------|--------------|---------------------------|------------------------------|-------------------|------------------------------|--------------------|----------------|----------------|----------------|----------------|-------------------|-------------------------|-------------------------|----------------|---------------------------|----------------|----------------|----------------|--------------------------|------------------------------|--------------------------|-----------------------------|
| Peak      | Desialylated<br>CFG notation | CFG notation |                           |                              | All<br>conditions |                              | 1<br>Serum<br>ref. | 2<br>6h RT     | 3<br>2h RT     | 4<br>2h 4°C    | 5<br>6h after  | 6<br>gel 6h after | 7<br>2 months -<br>80°C | 8<br>2 months -<br>20°C | 9<br>24h 4°C   | 11<br>Plasma<br>ref. n=10 | 12<br>Vacuum   | 13<br>EDTA     | 14<br>Heparin  | 15<br>Hemolysis<br>water |                              | 11<br>Plasma<br>ref. n=5 | 16<br>Hemolysis<br>combined |
| 26        |                              |              | N4H5S2<br>m/z<br>2792.3   | Median                       | 53.90             | Median                       | 54.22              | 57.23          | 55.39          | 54.72          | 54.67          | 56.37             | 52.08                   | 53.64                   | 51.02          | 53.48                     | 53.71          | 54.58          | 56.41          | 53.44                    | Median                       | 49.46                    | 47.29                       |
|           |                              |              |                           | IQR                          | 50.80<br>57.09    | IQR                          | 52.00<br>57.88     | 51.21<br>60.64 | 51.42<br>57.75 | 52.16<br>57.52 | 51.43<br>58.88 | 51.59<br>58.67    | 48.87<br>54.17          | 50.27<br>54.05          | 47.76<br>56.94 | 48.94<br>56.58            | 49.38<br>56.27 | 49.52<br>57.56 | 53.41<br>58.24 | 51.00<br>56.35           | IQR                          | 45.90<br>53.48           | 41.70<br>54.85              |
|           |                              |              |                           | $\chi^2(14)$                 | 29.530            | Z                            | -                  | -1.274         | -0.968         | -0.153         | -0.663         | -1.682            | -2.191                  | -1.274                  | -1.070         | -                         | -0.968         | -1.580         | -1.274         | -1.172                   | Z                            | -                        | -0.135                      |
|           |                              |              |                           | p value                      | 0.009             | p value                      | -                  | 0.203          | 0.333          | 0.878          | 0.508          | 0.093             | 0.028                   | 0.203                   | 0.285          | -                         | 0.333          | 0.114          | 0.203          | 0.241                    | p value                      | -                        | 0.893                       |
| 27        |                              |              | N5H5S1F1<br>m/z<br>2850.3 | Median                       | 1.18              | Median                       | 1.29               | 1.03           | 1.25           | 1.17           | 1.26           | 1.23              | 1.26                    | 1.49                    | 1.09           | 1.12                      | 1.28           | 1.22           | 1.18           | 1.24                     | Median                       | 1.10                     | 1.17                        |
|           |                              |              |                           | IQR                          | 0.84<br>1.75      | IQR                          | 0.75<br>2.00       | 0.70<br>1.61   | 0.81<br>1.61   | 0.70<br>1.83   | 1.05<br>2.12   | 0.74<br>1.94      | 0.96<br>1.80            | 0.89<br>2.09            | 0.84<br>2.14   | 0.81<br>1.75              | 0.92<br>1.65   | 0.96<br>1.82   | 0.83<br>1.92   | 0.76<br>1.72             | IQR                          | 0.77<br>1.55             | 0.43<br>1.57                |
|           |                              |              |                           | $\chi^2(14)$                 | 15.090            | Z                            | -                  | -              | -              | -              | -              | -                 | -                       | -                       | -              | -                         | -              | -              | -              | -                        | Z                            | -                        | -0.944                      |
|           |                              |              |                           | p value                      | 0.372             | p value                      | -                  | -              | -              | -              | -              | -                 | -                       | -                       | -              | -                         | -              | -              | -              | -                        | p value                      | -                        | 0.345                       |
| 28        |                              |              | N5H6S1<br>m/z<br>2880.4   | Median                       | 0.32              | Median                       | 0.31               | 0.30           | 0.28           | 0.33           | 0.33           | 0.31              | 0.34                    | 0.38                    | 0.35           | 0.32                      | 0.27           | 0.31           | 0.28           | 0.30                     | Median                       | 0.34                     | 0.20                        |
|           |                              |              |                           | IQR                          | 0.26<br>0.38      | IQR                          | 0.28<br>0.40       | 0.24<br>0.34   | 0.23<br>0.38   | 0.26<br>0.42   | 0.29<br>0.36   | 0.23<br>0.39      | 0.29<br>0.47            | 0.35<br>0.54            | 0.28<br>0.42   | 0.23<br>0.37              | 0.24<br>0.32   | 0.25<br>0.36   | 0.19<br>0.36   | 0.22<br>0.35             | IQR                          | 0.28<br>0.40             | 0.17<br>0.28                |
|           |                              |              |                           | $\chi^2(14)$                 | 31.520            | Z                            | -                  | -1.172         | -1.478         | -0.255         | -0.561         | -1.376            | -1.274                  | -2.090                  | -0.255         | -                         | -0.866         | -0.764         | -0.561         | -0.663                   | Z                            | -                        | -1.483                      |
|           |                              |              |                           | p value                      | 0.005             | p value                      | -                  | 0.241          | 0.139          | 0.799          | 0.575          | 0.169             | 0.203                   | 0.037                   | 0.799          | -                         | 0.386          | 0.445          | 0.575          | 0.508                    | p value                      | -                        | 0.138                       |
| 29        |                              |              | N4H5S2F1<br>m/z<br>2966.4 | Median                       | 3.24              | Median                       | 3.59               | 3.22           | 3.46           | 3.12           | 2.94           | 3.41              | 3.33                    | 3.56                    | 2.86           | 3.13                      | 3.43           | 3.42           | 3.75           | 3.23                     | Median                       | 2.74                     | 2.05                        |
|           |                              |              |                           | IQR                          | 2.52<br>3.81      | IQR                          | 2.78<br>4.22       | 2.30<br>3.97   | 2.54<br>3.92   | 2.67<br>3.48   | 2.69<br>3.87   | 2.51<br>3.88      | 2.81<br>3.71            | 3.04<br>3.87            | 2.23<br>3.95   | 2.67<br>3.54              | 2.19<br>3.70   | 2.67<br>3.75   | 2.21<br>4.46   | 2.84<br>3.77             | IQR                          | 2.40<br>3.04             | 1.64<br>2.98                |
|           |                              |              |                           | $\chi^2(14)$                 | 20.840            | Z                            | -                  | -              | -              | -              | -              | -                 | -                       | -                       | -              | -                         | -              | -              | -              | -                        | Z                            | -                        | -1.483                      |
|           |                              |              |                           | p value                      | 0.106             | p value                      | -                  | -              | -              | -              | -              | -                 | -                       | -                       | -              | -                         | -              | -              | -              | -                        | p value                      | -                        | 0.138                       |
| 30        |                              |              | N5H5S2<br>m/z<br>3037.4   | Median                       | 0.07              | Median                       | 0.08               | 0.06           | 0.07           | 0.08           | 0.07           | 0.07              | 0.08                    | 0.09                    | 0.06           | 0.07                      | 0.07           | 0.08           | 0.10           | 0.08                     | Median                       | 0.05                     | 0.04                        |
|           |                              |              |                           | IQR                          | 0.05<br>0.11      | IQR                          | 0.04<br>0.12       | 0.03<br>0.09   | 0.04<br>0.12   | 0.04<br>0.12   | 0.02<br>0.09   | 0.05<br>0.18      | 0.06<br>0.13            | 0.05<br>0.11            | 0.03<br>0.10   | 0.05<br>0.11              | 0.05<br>0.14   | 0.05<br>0.13   | 0.05<br>0.11   | 0.05<br>0.12             | IQR                          | 0.05<br>0.08             | 0.02<br>0.08                |
|           |                              |              |                           | $\chi^2(14)$                 | 17.930            | Z                            | -                  | -              | -              | -              | -              | -                 | -                       | -                       | -              | -                         | -              | -              | -              | -                        | Z                            | -                        | -0.674                      |
|           |                              |              |                           | p value                      | 0.210             | p value                      | -                  | -              | -              | -              | -              | -                 | -                       | -                       | -              | -                         | -              | -              | -              | -                        | p value                      | -                        | 0.500                       |
| 31        |                              |              | N5H6S1F1<br>m/z<br>3054.4 | Median                       | 0.09              | Median                       | 0.10               | 0.08           | 0.09           | 0.10           | 0.09           | 0.08              | 0.10                    | 0.12                    | 0.08           | 0.10                      | 0.08           | 0.09           | 0.06           | 0.09                     | Median                       | 0.07                     | 0.03                        |
|           |                              |              |                           | IQR                          | 0.06<br>0.12      | IQR                          | 0.05<br>0.15       | 0.05<br>0.11   | 0.05<br>0.12   | 0.07<br>0.14   | 0.07<br>0.11   | 0.04<br>0.09      | 0.06<br>0.13            | 0.06<br>0.15            | 0.04<br>0.14   | 0.06<br>0.12              | 0.05<br>0.12   | 0.07<br>0.12   | 0.04<br>0.11   | 0.05<br>0.15             | IQR                          | 0.03<br>0.11             | 0.02<br>0.08                |
|           |                              |              |                           | $\chi^2(14)$                 | 12.000            | Z                            | -                  | -              | -              | -              | -              | -                 | -                       | -                       | -              | -                         | -              | -              | -              | -                        | Z                            | -                        | -0.674                      |
|           |                              |              |                           | p value                      | 0.606             | p value                      | -                  | -              | -              | -              | -              | -                 | -                       | -                       | -              | -                         | -              | -              | -              | -                        | p value                      | -                        | 0.500                       |
| 32        |                              |              | N5H5S2F1<br>m/z<br>3211.5 | Median                       | 0.66              | Median                       | 0.89               | 0.63           | 0.66           | 0.71           | 0.72           | 0.65              | 0.66                    | 0.79                    | 0.60           | 0.65                      | 0.72           | 0.70           | 0.65           | 0.62                     | Median                       | 0.59                     | 0.43                        |
|           |                              |              |                           | IQR                          | 0.52<br>0.88      | IQR                          | 0.48<br>1.15       | 0.48<br>0.85   | 0.56<br>0.96   | 0.57<br>0.87   | 0.43<br>0.89   | 0.52<br>0.88      | 0.56<br>0.98            | 0.69<br>1.09            | 0.41<br>0.75   | 0.56<br>0.73              | 0.42<br>1.03   | 0.58<br>1.00   | 0.45<br>0.88   | 0.51<br>1.13             | IQR                          | 0.51<br>0.68             | 0.25<br>0.65                |
|           |                              |              |                           | $\chi^2(14)$                 | 12.960            | Z                            | -                  | -              | -              | -              | -              | -                 | -                       | -                       | -              | -                         | -              | -              | -              | -                        | Z                            | -                        | -1.483                      |
|           |                              |              |                           | p value                      | 0.530             | p value                      | -                  | -              | -              | -              | -              | -                 | -                       | -                       | -              | -                         | -              | -              | -              | -                        | p value                      | -                        | 0.138                       |
| 33        |                              |              | N5H6S2<br>m/z<br>3241.5   | Median                       | 0.66              | Median                       | 0.65               | 0.72           | 0.82           | 0.71           | 0.61           | 0.60              | 0.79                    | 0.77                    | 0.57           | 0.63                      | 0.61           | 0.66           | 0.52           | 0.54                     | Median                       | 0.62                     | 0.31                        |
|           |                              |              |                           | IQR                          | 0.44<br>0.97      | IQR                          | 0.43<br>1.11       | 0.47<br>1.05   | 0.55<br>1.11   | 0.50<br>1.02   | 0.47<br>0.80   | 0.43<br>1.08      | 0.48<br>0.97            | 0.55<br>1.13            | 0.41<br>1.14   | 0.54<br>1.05              | 0.47<br>1.16   | 0.44<br>1.02   | 0.35<br>0.81   | 0.37<br>0.91             | IQR                          | 0.43<br>0.70             | 0.16<br>0.36                |
|           |                              |              |                           | $\chi^2(14)$                 | 23.880            | Z                            | -                  | -0.357         | -1.580         | -0.153         | -1.274         | -0.866            | -0.357                  | -0.866                  | -0.357         | -                         | -0.357         | -1.886         | -0.663         | -1.682                   | Z                            | -                        | -2.023                      |
|           |                              |              |                           | p value                      | 0.047             | p value                      | -                  | 0.721          | 0.114          | 0.878          | 0.203          | 0.386             | 0.721                   | 0.386                   | 0.721          | -                         | 0.721          | 0.059          | 0.508          | 0.093                    | p value                      | -                        | 0.043                       |
| 34        |                              |              | N5H6S2F1<br>m/z<br>3415.6 | Median                       | 0.10              | Median                       | 0.10               | 0.09           | 0.11           | 0.10           | 0.08           | 0.11              | 0.11                    | 0.13                    | 0.11           | 0.10                      | 0.08           | 0.13           | 0.10           | 0.08                     | Median                       | 0.08                     | 0.05                        |
|           |                              |              |                           | IQR                          | 0.06<br>0.16      | IQR                          | 0.07<br>0.18       | 0.05<br>0.16   | 0.05<br>0.22   | 0.07<br>0.18   | 0.06<br>0.19   | 0.07<br>0.16      | 0.08<br>0.15            | 0.08<br>0.16            | 0.05<br>0.17   | 0.07<br>0.18              | 0.05<br>0.24   | 0.07<br>0.16   | 0.04<br>0.14   | 0.06<br>0.12             | IQR                          | 0.06<br>0.11             | 0.03<br>0.06                |
|           |                              |              |                           | $\chi^2(14)$                 | 13.010            | Z                            | -                  | -              | -              | -              | -              | -                 | -                       | -                       | -              | -                         | -              | -              | -              | -                        | Z                            | -                        | -2.023                      |
|           |                              |              |                           | p value                      | 0.526             | p value                      | -                  | -              | -              | -              | -              | -                 | -                       | -                       | -              | -                         | -              | -              | -              | -                        | p value                      | -                        | 0.043                       |

| Structure |                              |              |                           | Friedman's test <sup>a</sup> |                   | Wilcoxon's test <sup>b</sup> |                    |               |               |              |               |                   |                         |                         |              |                           |               |              |               |                          | Wilcoxon's test <sup>c</sup> |                          |                             |
|-----------|------------------------------|--------------|---------------------------|------------------------------|-------------------|------------------------------|--------------------|---------------|---------------|--------------|---------------|-------------------|-------------------------|-------------------------|--------------|---------------------------|---------------|--------------|---------------|--------------------------|------------------------------|--------------------------|-----------------------------|
| Peak      | Desialylated<br>CFG notation | CFG notation |                           |                              | All<br>conditions |                              | 1<br>Serum<br>ref. | 2<br>6h RT    | 3<br>2h RT    | 4<br>2h 4°C  | 5<br>6h after | 6<br>gel 6h after | 7<br>2 months -<br>80°C | 8<br>2 months -<br>20°C | 9<br>24h 4°C | 11<br>Plasma<br>ref. n=10 | 12<br>Vacuum  | 13<br>EDTA   | 14<br>Heparin | 15<br>Hemolysis<br>water |                              | 11<br>Plasma<br>ref. n=5 | 16<br>Hemolysis<br>combined |
| 35        |                              |              | N5H6S3<br>m/z<br>3602.7   | Median                       | 5.47              | Median                       | 6.18               | 6.22          | 7.89          | 5.35         | 5.03          | 5.61              | 4.80                    | 5.41                    | 4.16         | 5.97                      | 5.93          | 6.46         | 6.37          | 5.99                     | Median                       | 6.34                     | 3.84                        |
|           |                              |              |                           | IQR                          | 3.79<br>8.79      | IQR                          | 3.50<br>9.85       | 4.15<br>11.08 | 4.11<br>10.21 | 4.32<br>8.27 | 3.67<br>6.61  | 3.40<br>9.28      | 4.14<br>7.02            | 3.13<br>8.04            | 2.52<br>9.02 | 4.30<br>11.04             | 4.35<br>10.61 | 4.39<br>8.88 | 3.08<br>9.54  | 3.44<br>8.65             | IQR                          | 3.86<br>9.61             | 1.99<br>5.92                |
|           |                              |              |                           | $\chi^2(14)$                 | 20.570            | Z                            | -                  | -             | -             | -            | -             | -                 | -                       | -                       | -            | -                         | -             | -            | -             | -                        | Z                            | -                        | -2.023                      |
|           |                              |              |                           | p value                      | 0.113             | p value                      | -                  | -             | -             | -            | -             | -                 | -                       | -                       | -            | -                         | -             | -            | -             | -                        | p value                      | -                        | 0.043                       |
| 36        |                              |              | N6H7S2<br>m/z<br>3690.7   | Median                       | 0.06              | Median                       | 0.07               | 0.06          | 0.08          | 0.06         | 0.06          | 0.06              | 0.07                    | 0.08                    | 0.05         | 0.08                      | 0.07          | 0.07         | 0.06          | 0.07                     | Median                       | 0.07                     | 0.05                        |
|           |                              |              |                           | IQR                          | 0.04<br>0.09      | IQR                          | 0.04<br>0.11       | 0.04<br>0.10  | 0.04<br>0.10  | 0.04<br>0.09 | 0.04<br>0.08  | 0.02<br>0.09      | 0.05<br>0.11            | 0.06<br>0.10            | 0.03<br>0.09 | 0.06<br>0.08              | 0.06<br>0.09  | 0.04<br>0.09 | 0.05<br>0.07  | 0.03<br>0.09             | IQR                          | 0.05<br>0.10             | 0.02<br>0.06                |
|           |                              |              |                           | $\chi^2(14)$                 | 10.050            | Z                            | -                  | -             | -             | -            | -             | -                 | -                       | -                       | -            | -                         | -             | -            | -             | -                        | Z                            | -                        | -2.023                      |
|           |                              |              |                           | p value                      | 0.759             | p value                      | -                  | -             | -             | -            | -             | -                 | -                       | -                       | -            | -                         | -             | -            | -             | -                        | p value                      | -                        | 0.043                       |
| 37        |                              |              | N5H6S3F1<br>m/z<br>3776.8 | Median                       | 1.03              | Median                       | 1.13               | 1.09          | 1.30          | 1.12         | 0.89          | 1.06              | 0.88                    | 1.07                    | 0.85         | 1.30                      | 1.13          | 1.13         | 1.10          | 0.95                     | Median                       | 1.27                     | 0.57                        |
|           |                              |              |                           | IQR                          | 0.61<br>1.51      | IQR                          | 0.53<br>2.06       | 0.51<br>1.43  | 0.64<br>1.81  | 0.62<br>1.63 | 0.33<br>1.86  | 0.66<br>1.64      | 0.42<br>1.45            | 0.64<br>1.50            | 0.60<br>1.20 | 0.57<br>2.43              | 0.66<br>1.60  | 0.88<br>1.52 | 0.51<br>1.53  | 0.59<br>1.57             | IQR                          | 0.53<br>2.29             | 0.27<br>1.25                |
|           |                              |              |                           | $\chi^2(14)$                 | 15.830            | Z                            | -                  | -             | -             | -            | -             | -                 | -                       | -                       | -            | -                         | -             | -            | -             | -                        | Z                            | -                        | -2.023                      |
|           |                              |              |                           | p value                      | 0.324             | p value                      | -                  | -             | -             | -            | -             | -                 | -                       | -                       | -            | -                         | -             | -            | -             | -                        | p value                      | -                        | 0.043                       |
| 38        |                              |              | N6H7S2F1<br>m/z<br>3864.8 | Median                       | 0.02              | Median                       | 0.02               | 0.02          | 0.01          | 0.02         | 0.02          | 0.01              | 0.03                    | 0.03                    | 0.02         | 0.02                      | 0.02          | 0.02         | 0.02          | 0.02                     | Median                       | 0.02                     | 0.02                        |
|           |                              |              |                           | IQR                          | 0.01<br>0.03      | IQR                          | 0.01<br>0.04       | 0.02<br>0.03  | 0.01<br>0.03  | 0.01<br>0.03 | 0.01<br>0.03  | 0.01<br>0.03      | 0.01<br>0.05            | 0.02<br>0.03            | 0.01<br>0.03 | 0.01<br>0.04              | 0.02<br>0.04  | 0.01<br>0.02 | 0.01<br>0.03  | 0.01<br>0.03             | IQR                          | 0.01<br>0.03             | 0.01<br>0.03                |
|           |                              |              |                           | $\chi^2(14)$                 | 10.540            | Z                            | -                  | -             | -             | -            | -             | -                 | -                       | -                       | -            | -                         | -             | -            | -             | -                        | Z                            | -                        | -0.405                      |
|           |                              |              |                           | p value                      | 0.722             | p value                      | -                  | -             | -             | -            | -             | -                 | -                       | -                       | -            | -                         | -             | -            | -             | -                        | p value                      | -                        | 0.686                       |
| 39        |                              |              | N5H6S3F2<br>m/z<br>3950.9 | Median                       | 0.02              | Median                       | 0.02               | 0.03          | 0.01          | 0.02         | 0.02          | 0.02              | 0.02                    | 0.02                    | 0.02         | 0.01                      | 0.02          | 0.02         | 0.03          | 0.02                     | Median                       | 0.01                     | 0.01                        |
|           |                              |              |                           | IQR                          | 0.01<br>0.03      | IQR                          | 0.01<br>0.04       | 0.01<br>0.04  | 0.01<br>0.03  | 0.02<br>0.04 | 0.01<br>0.05  | 0.01<br>0.03      | 0.01<br>0.04            | 0.02<br>0.03            | 0.01<br>0.03 | 0.01<br>0.03              | 0.01<br>0.03  | 0.01<br>0.04 | 0.01<br>0.04  | 0.01<br>0.02             | IQR                          | 0.01<br>0.02             | 0.01<br>0.03                |
|           |                              |              |                           | $\chi^2(14)$                 | 10.740            | Z                            | -                  | -             | -             | -            | -             | -                 | -                       | -                       | -            | -                         | -             | -            | -             | -                        | Z                            | -                        | -0.135                      |
|           |                              |              |                           | p value                      | 0.706             | p value                      | -                  | -             | -             | -            | -             | -                 | -                       | -                       | -            | -                         | -             | -            | -             | -                        | p value                      | -                        | 0.893                       |
| 40        |                              |              | N6H7S3<br>m/z<br>4052.0   | Median                       | 0.12              | Median                       | 0.11               | 0.15          | 0.14          | 0.15         | 0.10          | 0.12              | 0.14                    | 0.12                    | 0.08         | 0.19                      | 0.17          | 0.12         | 0.10          | 0.14                     | Median                       | 0.15                     | 0.06                        |
|           |                              |              |                           | IQR                          | 0.09<br>0.17      | IQR                          | 0.08<br>0.24       | 0.08<br>0.18  | 0.10<br>0.23  | 0.10<br>0.16 | 0.07<br>0.15  | 0.09<br>0.19      | 0.09<br>0.18            | 0.09<br>0.16            | 0.05<br>0.19 | 0.12<br>0.22              | 0.10<br>0.23  | 0.11<br>0.16 | 0.07<br>0.15  | 0.08<br>0.19             | IQR                          | 0.11<br>0.20             | 0.05<br>0.12                |
|           |                              |              |                           | $\chi^2(14)$                 | 16.490            | Z                            | -                  | -             | -             | -            | -             | -                 | -                       | -                       | -            | -                         | -             | -            | -             | -                        | Z                            | -                        | -2.023                      |
|           |                              |              |                           | p value                      | 0.284             | p value                      | -                  | -             | -             | -            | -             | -                 | -                       | -                       | -            | -                         | -             | -            | -             | -                        | p value                      | -                        | 0.043                       |
| 41        |                              |              | N6H7S3F1<br>m/z<br>4226.1 | Median                       | 0.03              | Median                       | 0.02               | 0.03          | 0.03          | 0.04         | 0.03          | 0.04              | 0.03                    | 0.04                    | 0.03         | 0.03                      | 0.03          | 0.03         | 0.03          | 0.02                     | Median                       | 0.03                     | 0.02                        |
|           |                              |              |                           | IQR                          | 0.02<br>0.05      | IQR                          | 0.01<br>0.05       | 0.02<br>0.05  | 0.01<br>0.05  | 0.02<br>0.06 | 0.02<br>0.05  | 0.02<br>0.05      | 0.02<br>0.04            | 0.02<br>0.06            | 0.02<br>0.04 | 0.02<br>0.07              | 0.02<br>0.05  | 0.02<br>0.04 | 0.02<br>0.06  | 0.02<br>0.04             | IQR                          | 0.01<br>0.06             | 0.01<br>0.04                |
|           |                              |              |                           | $\chi^2(14)$                 | 13.600            | Z                            | -                  | -             | -             | -            | -             | -                 | -                       | -                       | -            | -                         | -             | -            | -             | -                        | Z                            | -                        | -0.944                      |
|           |                              |              |                           | p value                      | 0.480             | p value                      | -                  | -             | -             | -            | -             | -                 | -                       | -                       | -            | -                         | -             | -            | -             | -                        | p value                      | -                        | 0.345                       |
| 42        |                              |              | N6H7S3F2<br>m/z<br>4400.2 | Median                       | 0.01              | Median                       | 0.02               | 0.01          | 0.01          | 0.02         | 0.01          | 0.01              | 0.02                    | 0.01                    | 0.01         | 0.02                      | 0.01          | 0.01         | 0.01          | 0.01                     | Median                       | 0.02                     | 0.01                        |
|           |                              |              |                           | IQR                          | 0.01<br>0.02      | IQR                          | 0.01<br>0.03       | 0.01<br>0.02  | 0.01<br>0.03  | 0.01<br>0.03 | 0.01<br>0.02  | 0.01<br>0.02      | 0.01<br>0.03            | 0.00<br>0.02            | 0.01<br>0.02 | 0.01<br>0.02              | 0.01<br>0.02  | 0.01<br>0.02 | 0.01<br>0.02  | 0.01<br>0.01             | IQR                          | 0.01<br>0.02             | 0.00<br>0.02                |
|           |                              |              |                           | $\chi^2(14)$                 | 13.690            | Z                            | -                  | -             | -             | -            | -             | -                 | -                       | -                       | -            | -                         | -             | -            | -             | -                        | Z                            | -                        | -2.023                      |
|           |                              |              |                           | p value                      | 0.473             | p value                      | -                  | -             | -             | -            | -             | -                 | -                       | -                       | -            | -                         | -             | -            | -             | -                        | p value                      | -                        | 0.043                       |
| 43        |                              |              | N6H7S4<br>m/z<br>4413.2   | Median                       | 0.23              | Median                       | 0.19               | 0.24          | 0.27          | 0.22         | 0.17          | 0.23              | 0.18                    | 0.17                    | 0.10         | 0.49                      | 0.37          | 0.31         | 0.27          | 0.35                     | Median                       | 0.53                     | 0.17                        |
|           |                              |              |                           | IQR                          | 0.14<br>0.35      | IQR                          | 0.08<br>0.46       | 0.12<br>0.36  | 0.15<br>0.47  | 0.17<br>0.32 | 0.10<br>0.25  | 0.14<br>0.32      | 0.11<br>0.27            | 0.11<br>0.26            | 0.06<br>0.39 | 0.27<br>0.58              | 0.25<br>0.53  | 0.22<br>0.36 | 0.16<br>0.36  | 0.18<br>0.47             | IQR                          | 0.26<br>0.60             | 0.13<br>0.30                |
|           |                              |              |                           | $\chi^2(14)$                 | 32.400            | Z                            | -                  | -0.051        | -0.459        | -0.255       | -0.561        | -0.357            | -0.968                  | -0.968                  | -0.663       | -                         | -1.070        | -2.090       | -1.886        | -1.274                   | Z                            | -                        | -1.753                      |
|           |                              |              |                           | p value                      | 0.004             | p value                      | -                  | 0.959         | 0.646         | 0.799        | 0.575         | 0.721             | 0.333                   | 0.333                   | 0.508        | -                         | 0.285         | 0.037        | 0.059         | 0.203                    | p value                      | -                        | 0.080                       |

| Structure |                              |              |                           | Friedman's test <sup>a</sup> |                   | Wilcoxon's test <sup>b</sup> |                    |              |              |              |               |                   |                         |                         |              |                           |              |              |               |                          | Wilcoxon's test <sup>c</sup> |                          |                             |
|-----------|------------------------------|--------------|---------------------------|------------------------------|-------------------|------------------------------|--------------------|--------------|--------------|--------------|---------------|-------------------|-------------------------|-------------------------|--------------|---------------------------|--------------|--------------|---------------|--------------------------|------------------------------|--------------------------|-----------------------------|
| Peak      | Desialylated<br>CFG notation | CFG notation |                           |                              | All<br>conditions |                              | 1<br>Serum<br>ref. | 2<br>6h RT   | 3<br>2h RT   | 4<br>2h 4°C  | 5<br>6h after | 6<br>gel 6h after | 7<br>2 months -<br>80°C | 8<br>2 months -<br>20°C | 9<br>24h 4°C | 11<br>Plasma<br>ref. n=10 | 12<br>Vacuum | 13<br>EDTA   | 14<br>Heparin | 15<br>Hemolysis<br>water |                              | 11<br>Plasma<br>ref. n=5 | 16<br>Hemolysis<br>combined |
| 44        |                              |              | N6H7S4F1<br>m/z<br>4587.4 | Median                       | 0.05              | Median                       | 0.04               | 0.04         | 0.05         | 0.06         | 0.06          | 0.05              | 0.04                    | 0.05                    | 0.04         | 0.07                      | 0.07         | 0.07         | 0.06          | 0.07                     | Median                       | 0.09                     | 0.05                        |
|           |                              |              |                           | IQR                          | 0.03<br>0.08      | IQR                          | 0.02<br>0.11       | 0.03<br>0.06 | 0.04<br>0.07 | 0.03<br>0.11 | 0.03<br>0.08  | 0.03<br>0.08      | 0.02<br>0.06            | 0.03<br>0.08            | 0.03<br>0.05 | 0.04<br>0.16              | 0.05<br>0.11 | 0.03<br>0.08 | 0.04<br>0.13  | 0.03<br>0.10             | IQR                          | 0.03<br>0.17             | 0.02<br>0.08                |
|           |                              |              |                           | $\chi^2(14)$                 | 24.480            | Z                            | -                  | -0.561       | -0.459       | -1.070       | -0.459        | -0.357            | -0.153                  | -0.051                  | -0.968       | -                         | -0.561       | -0.255       | -1.784        | -1.478                   | Z                            | -                        | -1.753                      |
|           |                              |              |                           | p value                      | 0.040             | p value                      | -                  | 0.575        | 0.646        | 0.285        | 0.646         | 0.721             | 0.878                   | 0.959                   | 0.333        | -                         | 0.575        | 0.799        | 0.074         | 0.139                    | p value                      | -                        | 0.080                       |
| 45        |                              |              | N6H7S4F2<br>m/z<br>4761.5 | Median                       | 0.02              | Median                       | 0.02               | 0.01         | 0.01         | 0.02         | 0.02          | 0.01              | 0.01                    | 0.02                    | 0.02         | 0.01                      | 0.01         | 0.02         | 0.03          | 0.01                     | Median                       | 0.01                     | 0.02                        |
|           |                              |              |                           | IQR                          | 0.01<br>0.03      | IQR                          | 0.01<br>0.03       | 0.01<br>0.02 | 0.00<br>0.03 | 0.01<br>0.03 | 0.01<br>0.03  | 0.01<br>0.02      | 0.01<br>0.02            | 0.01<br>0.03            | 0.01<br>0.03 | 0.01<br>0.03              | 0.01<br>0.03 | 0.01<br>0.02 | 0.02<br>0.04  | 0.01<br>0.03             | IQR                          | 0.01<br>0.03             | 0.01<br>0.03                |
|           |                              |              |                           | $\chi^2(14)$                 | 17.110            | Z                            | -                  | -            | -            | -            | -             | -                 | -                       | -                       | -            | -                         | -            | -            | -             | -                        | Z                            | -                        | -0.674                      |
|           |                              |              |                           | p value                      | 0.250             | p value                      | -                  | -            | -            | -            | -             | -                 | -                       | -                       | -            | -                         | -            | -            | -             | -                        | p value                      | -                        | 0.500                       |
| 46        |                              |              | N6H7S4F3<br>m/z<br>4935.7 | Median                       | 0.01              | Median                       | 0.01               | 0.01         | 0.01         | 0.02         | 0.01          | 0.00              | 0.01                    | 0.01                    | 0.01         | 0.01                      | 0.01         | 0.01         | 0.01          | 0.01                     | Median                       | 0.01                     | 0.01                        |
|           |                              |              |                           | IQR                          | 0.01<br>0.02      | IQR                          | 0.01<br>0.02       | 0.00<br>0.02 | 0.00<br>0.01 | 0.01<br>0.03 | 0.01<br>0.01  | 0.00<br>0.01      | 0.00<br>0.03            | 0.00<br>0.02            | 0.01<br>0.02 | 0.01<br>0.02              | 0.00<br>0.02 | 0.01<br>0.01 | 0.01<br>0.02  | 0.01<br>0.01             | IQR                          | 0.01<br>0.01             | 0.01<br>0.01                |
|           |                              |              |                           | $\chi^2(14)$                 | 17.030            | Z                            | -                  | -            | -            | -            | -             | -                 | -                       | -                       | -            | -                         | -            | -            | -             | -                        | Z                            | -                        | -0.674                      |
|           |                              |              |                           | p value                      | 0.255             | p value                      | -                  | -            | -            | -            | -             | -                 | -                       | -                       | -            | -                         | -            | -            | -             | -                        | p value                      | -                        | 0.500                       |
