# Supplementary material
Source: publisher figshare collection journal article supplement (https://plos.figshare.com/articles/dataset/_/6806699)
Supplement: Supplementary file 1 [file 1 › pone.0200507.s007.pdf]

S4 Table.

Results of CE-LIF measurements and statistical analysis. Relative intensities of individual N-glycans (median, IQR) were tested for differences between all groups (n=15) (a) by Friedman's test and  $p < .05$  were considered statistically significant. Only the structures, which were detected as significantly different by Friedman's test, were further analysed by a Wilcoxon's post-hoc test to identify if such differences occurred as a result of deviation from the standard procedure. (b) Wilcoxon's test was used to compare standard conditions with the altered conditions for plasma and serum separately. Statistical tests between two non-standard conditions were not performed, since these are not relevant for this study. Nine tests were performed for serum conditions, resulting in a Bonferroni corrected p value of .0056. For plasma conditions five tests were performed including (c) Wilcoxon's test where results from only 5 individuals were compared, therefore the Bonferroni corrected p value for plasma samples was .01. The Oxford notations are: pentasaccharide core (A0) consists of three mannose residues and two N-acetylglucosamines (GlcNAc); F core fucose; aF antennary fucose; Ax, number GlcNAc attached to the core; B, bisecting GlcNAc; Gx, number of  $\beta$ 1-4 linked galactose (G) on antennae; [3]G1 and [6]G1 indicates that the galactose is on the antenna of the  $\alpha$ 1-3 or  $\alpha$ 1-6 mannose. The [x] indicate the linkage type: in A2[3]G1 the galactose is linked to the  $\alpha$ 1-3 mannose, and in A3[2,2,6] the N-acetylglucosamines are  $\beta$ 1-2-,  $\beta$ 1-2-, and  $\beta$ 1-6-linked to the trimannosyl core. In A3G3[3], the [3] indicates a  $\beta$ 1-3 linkage between terminal G and GlcNAc.

| Peak | GU                   | Structure                 |                 |                      | Friedman's test <sup>a</sup> |          | Wilcoxon's test <sup>b</sup> |            |        |        |        |          |              |          |          |         |         |                  |        |        |         | Wilcoxon's test <sup>c</sup> |         |                 |                    |
|------|----------------------|---------------------------|-----------------|----------------------|------------------------------|----------|------------------------------|------------|--------|--------|--------|----------|--------------|----------|----------|---------|---------|------------------|--------|--------|---------|------------------------------|---------|-----------------|--------------------|
|      |                      | Desialylated CFG notation | Oxford notation | Oxford notation name |                              | All      |                              | 1          | 2      | 3      | 4      | 5        | 6            | 7        | 8        | 9       | 10      | 11               | 12     | 13     | 14      | 15                           |         | 11              | 16                 |
|      |                      |                           |                 |                      |                              |          |                              | Serum ref. | 6h RT  | 2h RT  | 2h 4°C | 6h after | gel 6h after | 2M -80°C | 2M -20°C | 24h 4°C | 48h 4°C | Plasma ref. n=10 | Vacuum | EDTA   | Heparin | Hemolysis water              |         | Plasma ref. n=5 | Hemolysis combined |
| 1    | 4.93                 |                           |                 | M3                   | Median                       | 0.11     | Median                       | 0.09       | 0.11   | 0.11   | 0.10   | 0.11     | 0.10         | 0.10     | 0.11     | 0.10    | 0.10    | 0.12             | 0.12   | 0.09   | 0.39    | 0.12                         | Median  | 0.12            | 0.13               |
|      |                      |                           |                 |                      | IQR                          | 0.07     | IQR                          | 0.07       | 0.08   | 0.07   | 0.03   | 0.04     | 0.03         | 0.05     | 0.05     | 0.06    | 0.04    | 0.08             | 0.07   | 0.06   | 0.21    | 0.11                         | IQR     | 0.09            | 0.09               |
|      |                      |                           |                 |                      |                              | 0.13     |                              | 0.13       | 0.14   | 0.12   | 0.11   | 0.13     | 0.11         | 0.12     | 0.12     | 0.12    | 0.16    | 0.14             | 0.12   | 0.52   | 0.21    |                              | 0.13    | 0.16            |                    |
|      |                      |                           |                 |                      | $\chi^2(14)$                 | 34.331   | Z                            | -          | -0.866 | -0.051 | -0.561 | -0.866   | -1.274       | -0.866   | -0.459   | -0.153  | -0.357  | -                | -0.866 | -1.682 | -2.599  | -0.663                       | Z       | -               | -1.214             |
|      |                      |                           |                 |                      | p value                      | 0.002    | p value                      | -          | 0.386  | 0.959  | 0.575  | 0.386    | 0.203        | 0.386    | 0.646    | 0.878   | 0.721   | -                | 0.386  | 0.093  | 0.009   | 0.508                        | p value | -               | 0.225              |
| 2    | 5.77                 |                           |                 | A1                   | Median                       | 0.13     | Median                       | 0.11       | 0.13   | 0.12   | 0.13   | 0.11     | 0.11         | 0.13     | 0.13     | 0.15    | 0.11    | 0.13             | 0.13   | 0.13   | 0.12    | 0.13                         | Median  | 0.13            | 0.14               |
|      |                      |                           |                 |                      | IQR                          | 0.10     | IQR                          | 0.09       | 0.09   | 0.11   | 0.10   | 0.09     | 0.09         | 0.11     | 0.10     | 0.08    | 0.08    | 0.09             | 0.11   | 0.08   | 0.10    | 0.10                         | IQR     | 0.11            | 0.11               |
|      |                      |                           |                 |                      |                              | 0.24     |                              | 0.26       | 0.31   | 0.24   | 0.28   | 0.24     | 0.27         | 0.32     | 0.28     | 0.27    | 0.25    | 0.27             | 0.27   | 0.28   | 0.26    | 0.32                         |         | 0.31            | 0.34               |
|      |                      |                           |                 |                      | $\chi^2(14)$                 | 29.730   | Z                            | -          | -1.070 | -0.561 | -1.274 | -2.090   | -0.459       | -1.988   | -1.478   | -0.663  | -1.478  | -                | -1.274 | -0.968 | -0.051  | -1.682                       | Z       | -               | -1.214             |
|      |                      |                           |                 |                      | p value                      | 0.008    | p value                      | -          | 0.285  | 0.575  | 0.203  | 0.037    | 0.646        | 0.047    | 0.139    | 0.508   | 0.139   | -                | 0.203  | 0.333  | 0.959   | 0.093                        | p value | -               | 0.225              |
| 3    | 6.72                 |                           |                 | M5                   | Median                       | 0.97     | Median                       | 0.98       | 0.93   | 0.95   | 0.96   | 0.99     | 1.01         | 0.97     | 0.95     | 0.98    | 0.95    | 0.95             | 1.01   | 0.96   | 0.89    | 0.99                         | Median  | 0.92            | 1.00               |
|      |                      |                           |                 |                      | IQR                          | 0.76     | IQR                          | 0.77       | 0.78   | 0.83   | 0.70   | 0.74     | 0.75         | 0.69     | 0.68     | 0.91    | 0.79    | 0.72             | 0.82   | 0.85   | 0.75    | 0.71                         | IQR     | 0.65            | 0.75               |
|      |                      |                           |                 |                      |                              | 1.10     |                              | 1.14       | 1.17   | 1.10   | 1.10   | 1.18     | 1.14         | 1.09     | 1.02     | 1.08    | 1.27    | 1.06             | 1.24   | 1.10   | 1.18    | 1.18                         |         | 1.19            | 1.33               |
|      |                      |                           |                 |                      | $\chi^2(14)$                 | 23.210   | Z                            | -          | -      | -      | -      | -        | -            | -        | -        | -       | -       | -                | -      | -      | -       | -                            | Z       | -               | -2.023             |
|      |                      |                           |                 |                      | p value                      | 0.057    | p value                      | -          | -      | -      | -      | -        | -            | -        | -        | -       | -       | -                | -      | -      | -       | p value                      | -       | 0.043           |                    |
| 4    | 7.17                 |                           |                 | A2B                  | Median                       | 0.52     | Median                       | 0.46       | 0.49   | 0.52   | 0.49   | 0.48     | 0.51         | 0.54     | 0.54     | 0.52    | 0.58    | 0.54             | 0.62   | 0.56   | 0.55    | 0.54                         | Median  | 0.54            | 0.54               |
|      |                      |                           |                 |                      | IQR                          | 0.45     | IQR                          | 0.39       | 0.41   | 0.46   | 0.22   | 0.34     | 0.38         | 0.47     | 0.49     | 0.36    | 0.47    | 0.50             | 0.48   | 0.46   | 0.35    | 0.31                         | IQR     | 0.42            | 0.52               |
|      |                      |                           |                 |                      |                              | 0.60     |                              | 0.54       | 0.58   | 0.57   | 0.60   | 0.57     | 0.57         | 0.63     | 0.59     | 0.59    | 0.64    | 0.63             | 0.75   | 0.58   | 0.61    | 0.61                         |         | 0.61            | 0.70               |
|      |                      |                           |                 |                      | $\chi^2(14)$                 | 19.430   | Z                            | -          | -      | -      | -      | -        | -            | -        | -        | -       | -       | -                | -      | -      | -       | -                            | -       | Z               | -                  |
|      |                      |                           |                 |                      | p value                      | 0.149    | p value                      | -          | -      | -      | -      | -        | -            | -        | -        | -       | -       | -                | -      | -      | -       | p value                      | -       | 0.500           |                    |
| 5    | 7.62<br>7.74<br>7.74 |                           |                 | FA2<br>A3<br>A3      | Median                       | 2.61     | Median                       | 2.42       | 2.70   | 2.60   | 2.67   | 2.81     | 2.58         | 2.51     | 2.25     | 2.60    | 2.63    | 2.70             | 2.63   | 2.47   | 2.54    | 2.76                         | Median  | 2.78            | 3.01               |
|      |                      |                           |                 |                      | IQR                          | 2.10     | IQR                          | 1.92       | 2.13   | 2.08   | 2.11   | 2.13     | 1.91         | 2.08     | 1.72     | 2.01    | 1.97    | 2.10             | 2.47   | 2.12   | 2.04    | 2.24                         | IQR     | 2.42            | 2.28               |
|      |                      |                           |                 |                      |                              | 2.99     |                              | 3.16       | 3.00   | 2.96   | 3.03   | 3.06     | 3.00         | 2.95     | 2.77     | 3.06    | 3.08    | 3.09             | 3.01   | 3.02   | 2.82    | 3.12                         |         | 3.42            | 3.37               |
|      |                      |                           |                 |                      | $\chi^2(14)$                 | 54.827   | Z                            | -          | -1.172 | -0.764 | -0.968 | -1.784   | -0.415       | -0.968   | -1.478   | -1.478  | -0.357  | -                | -0.968 | -1.988 | -2.701  | -1.376                       | Z       | -               | -0.135             |
|      |                      |                           |                 |                      | p value                      | < 0.0001 | p value                      | -          | 0.241  | 0.445  | 0.333  | 0.074    | 0.678        | 0.333    | 0.139    | 0.139   | 0.721   | -                | 0.333  | 0.047  | 0.007   | 0.169                        | p value | -               | 0.893              |
| 6    | 7.95                 |                           |                 | A2[3]G1              | Median                       | 0.54     | Median                       | 0.53       | 0.54   | 0.52   | 0.54   | 0.54     | 0.53         | 0.54     | 0.54     | 0.51    | 0.52    | 0.55             | 0.53   | 0.56   | 0.50    | 0.58                         | Median  | 0.54            | 0.59               |
|      |                      |                           |                 |                      | IQR                          | 0.49     | IQR                          | 0.48       | 0.50   | 0.42   | 0.51   | 0.49     | 0.45         | 0.50     | 0.51     | 0.46    | 0.45    | 0.49             | 0.48   | 0.50   | 0.42    | 0.53                         | IQR     | 0.47            | 0.49               |
|      |                      |                           |                 |                      |                              | 0.58     |                              | 0.58       | 0.55   | 0.55   | 0.59   | 0.57     | 0.56         | 0.58     | 0.60     | 0.56    | 0.57    | 0.60             | 0.61   | 0.59   | 0.54    | 0.61                         |         | 0.58            | 0.62               |
|      |                      |                           |                 |                      | $\chi^2(14)$                 | 43.170   | Z                            | -          | -0.968 | -1.580 | -0.255 | -0.357   | -0.357       | -0.153   | -0.357   | -1.784  | -0.663  | -                | -1.580 | -0.561 | -2.803  | -1.478                       | Z       | -               | -1.753             |
|      |                      |                           |                 |                      | p value                      | < 0.0001 | p value                      | -          | 0.333  | 0.114  | 0.799  | 0.721    | 0.721        | 0.878    | 0.721    | 0.074   | 0.508   | -                | 0.114  | 0.575  | 0.005   | 0.139                        | p value | -               | 0.080              |
| 7    | 8.07                 |                           |                 | FA2B                 | Median                       | 0.61     | Median                       | 0.61       | 0.61   | 0.59   | 0.60   | 0.62     | 0.62         | 0.63     | 0.62     | 0.61    | 0.61    | 0.60             | 0.61   | 0.62   | 0.56    | 0.64                         | Median  | 0.58            | 0.62               |
|      |                      |                           |                 |                      | IQR                          | 0.57     | IQR                          | 0.58       | 0.55   | 0.57   | 0.55   | 0.58     | 0.58         | 0.60     | 0.57     | 0.58    | 0.60    | 0.55             | 0.56   | 0.55   | 0.53    | 0.59                         | IQR     | 0.55            | 0.59               |
|      |                      |                           |                 |                      |                              | 0.69     |                              | 0.67       | 0.68   | 0.67   | 0.71   | 0.70     | 0.71         | 0.71     | 0.70     | 0.71    | 0.71    | 0.71             | 0.70   | 0.69   | 0.64    | 0.71                         |         | 0.72            | 0.72               |
|      |                      |                           |                 |                      | $\chi^2(14)$                 | 47.410   | Z                            | -          | -0.663 | -1.784 | -0.459 | -1.682   | -0.357       | -0.866   | -0.153   | -0.255  | -1.172  | -                | -0.561 | -1.172 | -2.701  | -1.478                       | Z       | -               | -1.753             |
|      |                      |                           |                 |                      | p value                      | < 0.0001 | p value                      | -          | 0.508  | 0.074  | 0.646  | 0.093    | 0.721        | 0.386    | 0.878    | 0.799   | 0.241   | -                | 0.575  | 0.241  | 0.007   | 0.139                        | p value | -               | 0.080              |
| 8    | 8.45                 |                           |                 | A2B[3]G1             | Median                       | 0.56     | Median                       | 0.56       | 0.54   | 0.53   | 0.55   | 0.57     | 0.59         | 0.57     | 0.56     | 0.55    | 0.57    | 0.54             | 0.54   | 0.54   | 0.52    | 0.59                         | Median  | 0.56            | 0.61               |
|      |                      |                           |                 |                      | IQR                          | 0.52     | IQR                          | 0.48       | 0.52   | 0.48   | 0.51   | 0.54     | 0.52         | 0.51     | 0.53     | 0.53    | 0.53    | 0.49             | 0.50   | 0.51   | 0.47    | 0.54                         | IQR     | 0.48            | 0.55               |
|      |                      |                           |                 |                      |                              | 0.60     |                              | 0.58       | 0.59   | 0.59   | 0.62   | 0.60     | 0.63         | 0.69     | 0.64     | 0.63    | 0.66    | 0.61             | 0.65   | 0.59   | 0.57    | 0.62                         |         | 0.68            | 0.76               |
|      |                      |                           |                 |                      | $\chi^2(14)$                 | 48.600   | Z                            | -          | -0.255 | -1.172 | -0.153 | -1.682   | -1.172       | -0.968   | -0.357   | -1.274  | -1.682  | -                | -0.051 | -0.561 | -2.090  | -2.701                       | Z       | -               | -2.023             |
|      |                      |                           |                 |                      | p value                      | < 0.0001 | p value                      | -          | 0.799  | 0.241  | 0.878  | 0.093    | 0.241        | 0.333    | 0.721    | 0.203   | 0.093   | -                | 0.959  | 0.575  | 0.037   | 0.007                        | p value | -               | 0.043              |

| Peak | GU                   | Structure                 |                 |                      | Friedman's test <sup>a</sup> |          |         | Wilcoxon's test <sup>b</sup> |        |        |        |          |              |          |          |         |         |                  |        |        |         |                 | Wilcoxon's test <sup>c</sup> |                 |                    |
|------|----------------------|---------------------------|-----------------|----------------------|------------------------------|----------|---------|------------------------------|--------|--------|--------|----------|--------------|----------|----------|---------|---------|------------------|--------|--------|---------|-----------------|------------------------------|-----------------|--------------------|
|      |                      | Desialylated CFG notation | Oxford notation | Oxford notation name | All                          |          |         | 1                            | 2      | 3      | 4      | 5        | 6            | 7        | 8        | 9       | 10      | 11               | 12     | 13     | 14      | 15              |                              | 11              | 16                 |
|      |                      |                           |                 |                      |                              |          |         | Serum ref.                   | 6h RT  | 2h RT  | 2h 4°C | 6h after | gel 6h after | 2M -80°C | 2M -20°C | 24h 4°C | 48h 4°C | Plasma ref. n=10 | Vacuum | EDTA   | Heparin | Hemolysis water |                              | Plasma ref. n=5 | Hemolysis combined |
| 9    | 8.58                 |                           |                 | FA2[6]G1             | Median                       | 1.83     | Median  | 1.80                         | 1.83   | 1.88   | 1.84   | 1.77     | 1.81         | 1.83     | 1.66     | 1.86    | 1.82    | 1.73             | 1.85   | 1.79   | 1.83    | 1.70            | Median                       | 2.14            | 1.92               |
|      |                      |                           |                 |                      | IQR                          | 1.65     | IQR     | 1.62                         | 1.71   | 1.72   | 1.73   | 1.68     | 1.68         | 1.60     | 1.46     | 1.64    | 1.66    | 1.42             | 1.66   | 1.68   | 1.59    | 1.45            | IQR                          | 2.00            | 1.85               |
|      |                      |                           |                 |                      | $\chi^2(14)$                 | 49.190   | Z       | -                            | -0.357 | -0.968 | -0.153 | -0.968   | -0.764       | -1.070   | -2.293   | -0.866  | -0.153  | -                | -0.968 | -0.153 | -1.376  | -0.357          | Z                            | -               | -0.944             |
|      |                      |                           |                 |                      | p value                      | < 0.0001 | p value | -                            | 0.721  | 0.333  | 0.878  | 0.333    | 0.445        | 0.285    | 0.022    | 0.386   | 0.878   | -                | 0.333  | 0.878  | 0.169   | 0.721           | p value                      | -               | 0.345              |
| 10   | 8.88<br>8.91<br>8.93 |                           |                 | FA2[3]G1             | Median                       | 51.18    | Median  | 52.13                        | 50.01  | 50.67  | 51.83  | 52.48    | 51.22        | 49.93    | 51.01    | 50.85   | 50.92   | 51.60            | 50.75  | 52.84  | 51.34   | 51.86           | Median                       | 50.89           | 50.17              |
|      |                      |                           |                 | FA2B[6]G1            | IQR                          | 49.41    | IQR     | 49.69                        | 48.81  | 48.41  | 49.37  | 50.56    | 49.33        | 48.41    | 49.02    | 49.17   | 48.85   | 50.52            | 48.82  | 49.79  | 49.43   | 50.00           | IQR                          | 49.26           | 49.46              |
|      |                      |                           |                 | A2G2                 | $\chi^2(14)$                 | 38.220   | Z       | -                            | -1.682 | -1.784 | -0.663 | -0.764   | -0.663       | -2.395   | -1.478   | -0.866  | -1.070  | -                | -1.682 | -1.274 | -1.784  | -0.255          | Z                            | -               | -0.674             |
|      |                      |                           |                 | A2G2                 | p value                      | < 0.0001 | p value | -                            | 0.093  | 0.074  | 0.508  | 0.445    | 0.508        | 0.017    | 0.139    | 0.386   | 0.285   | -                | 0.093  | 0.203  | 0.074   | 0.799           | p value                      | -               | 0.500              |
| 11   | 9.23<br>9.41         |                           |                 | FA2B[3]G1            | Median                       | 1.71     | Median  | 1.59                         | 1.71   | 1.70   | 1.76   | 1.77     | 1.86         | 1.85     | 1.66     | 1.82    | 1.73    | 1.56             | 1.61   | 1.74   | 1.54    | 1.69            | Median                       | 1.64            | 1.78               |
|      |                      |                           |                 | A2BG2                | IQR                          | 1.36     | IQR     | 0.89                         | 1.05   | 1.16   | 1.04   | 1.09     | 1.34         | 1.01     | 0.66     | 0.49    | 1.23    | 1.03             | 1.44   | 1.45   | 0.62    | 1.20            | IQR                          | 1.43            | 1.59               |
|      |                      |                           |                 | A2BG2                | $\chi^2(14)$                 | 24.905   | Z       | -                            | -0.280 | -0.255 | -0.140 | -0.840   | -1.362       | -1.260   | -0.296   | .000d   | -1.599  | -                | -0.296 | -1.599 | -0.560  | -2.073          | Z                            | -               | -2.023             |
|      |                      |                           |                 | A2BG2                | p value                      | 0.036    | p value | -                            | 0.779  | 0.799  | 0.889  | 0.401    | 0.173        | 0.208    | 0.767    | 1.000   | 0.110   | -                | 0.767  | 0.110  | 0.575   | 0.038           | p value                      | -               | 0.043              |
| 12   | 9.69                 |                           |                 | aFA2G2               | Median                       | 1.08     | Median  | 0.90                         | 1.06   | 1.13   | 0.87   | 1.08     | 1.00         | 1.28     | 1.25     | 1.09    | 1.19    | 1.14             | 1.25   | 1.02   | 1.16    | 1.12            | Median                       | 1.10            | 1.00               |
|      |                      |                           |                 | aFA2G2               | IQR                          | 0.87     | IQR     | 0.74                         | 0.92   | 1.00   | 0.71   | 0.85     | 0.73         | 1.06     | 0.99     | 0.77    | 0.83    | 1.04             | 0.74   | 0.73   | 0.72    | 0.95            | IQR                          | 0.87            | 0.91               |
|      |                      |                           |                 | aFA2G2               | $\chi^2(14)$                 | 1.43     | Z       | 1.12                         | 1.49   | 1.48   | 1.02   | 1.30     | 1.47         | 1.50     | 1.41     | 1.39    | 1.62    | 1.47             | 1.53   | 1.42   | 1.67    | 1.43            | Z                            | 1.35            | 1.33               |
|      |                      |                           |                 | aFA2G2               | p value                      | 0.680    | p value | -                            | -      | -      | -      | -        | -            | -        | -        | -       | -       | -                | -      | -      | -       | -               | p value                      | -               | -0.405             |
| 13   | 9.82                 |                           |                 | FA2G2                | Median                       | 13.69    | Median  | 13.63                        | 13.51  | 13.71  | 13.81  | 13.84    | 14.04        | 13.94    | 13.79    | 13.77   | 14.09   | 13.37            | 13.69  | 13.66  | 13.69   | 13.65           | Median                       | 13.12           | 13.08              |
|      |                      |                           |                 | FA2G2                | IQR                          | 13.07    | IQR     | 13.07                        | 13.00  | 12.82  | 13.01  | 13.30    | 13.01        | 13.10    | 13.20    | 13.53   | 13.55   | 12.81            | 12.59  | 12.79  | 12.71   | 12.98           | IQR                          | 12.60           | 12.79              |
|      |                      |                           |                 | FA2G2                | $\chi^2(14)$                 | 14.41    | Z       | 14.57                        | 14.61  | 14.74  | 14.47  | 14.84    | 14.51        | 14.72    | 14.69    | 14.58   | 14.76   | 13.99            | 14.10  | 14.43  | 14.17   | 14.11           | Z                            | 14.03           | 14.20              |
|      |                      |                           |                 | FA2G2                | p value                      | 0.001    | p value | -                            | -0.153 | -0.051 | -0.561 | -1.784   | -0.663       | -1.172   | -1.274   | -1.376  | -1.580  | -                | -0.051 | -1.274 | -1.070  | -2.497          | p value                      | -               | -0.674             |
| 14   | 10.14                |                           |                 | FA2BG2               | Median                       | 4.31     | Median  | 3.93                         | 4.12   | 4.16   | 4.17   | 4.27     | 4.46         | 4.54     | 4.50     | 4.29    | 4.58    | 4.07             | 4.52   | 4.35   | 4.10    | 4.59            | Median                       | 4.57            | 4.88               |
|      |                      |                           |                 | FA2BG2               | IQR                          | 3.87     | IQR     | 3.76                         | 3.68   | 3.60   | 3.42   | 4.06     | 3.66         | 4.06     | 3.92     | 4.07    | 3.83    | 3.63             | 3.86   | 3.99   | 3.45    | 3.91            | IQR                          | 3.87            | 4.18               |
|      |                      |                           |                 | FA2BG2               | $\chi^2(14)$                 | 5.03     | Z       | 4.81                         | 4.90   | 4.61   | 5.33   | 4.93     | 5.31         | 5.62     | 5.32     | 4.77    | 5.24    | 4.79             | 5.31   | 5.18   | 5.08    | 5.05            | Z                            | 5.45            | 5.65               |
|      |                      |                           |                 | FA2BG2               | p value                      | 0.001    | p value | -                            | -0.459 | -0.255 | -0.459 | -2.599   | -1.172       | -2.803   | -2.293   | -1.886  | -1.886  | -                | -1.784 | -0.255 | -1.478  | -0.153          | p value                      | -               | -2.023             |
| 15   | 10.95                |                           |                 | A3G3[3]              | Median                       | 1.55     | Median  | 1.53                         | 1.57   | 1.55   | 1.58   | 1.53     | 1.58         | 1.54     | 1.49     | 1.57    | 1.59    | 1.42             | 1.56   | 1.51   | 1.53    | 1.53            | Median                       | 1.56            | 1.53               |
|      |                      |                           |                 | A3G3[3]              | IQR                          | 1.43     | IQR     | 1.40                         | 1.46   | 1.47   | 1.45   | 1.44     | 1.45         | 1.35     | 1.40     | 1.51    | 1.36    | 1.31             | 1.45   | 1.36   | 1.40    | 1.39            | IQR                          | 1.40            | 1.42               |
|      |                      |                           |                 | A3[6]G3              | $\chi^2(14)$                 | 1.67     | Z       | 1.72                         | 1.68   | 1.71   | 1.71   | 1.74     | 1.73         | 1.65     | 1.65     | 1.74    | 1.72    | 1.57             | 1.68   | 1.66   | 1.70    | 1.62            | Z                            | 1.69            | 1.70               |
|      |                      |                           |                 | A3[6]G3              | p value                      | < 0.0001 | p value | -                            | -0.169 | 0.093  | 0.047  | 0.241    | 0.005        | 0.241    | 0.285    | 0.013   | 0.285   | -                | 0.017  | 0.013  | 0.005   | 0.169           | p value                      | -               | 0.686              |
| 16   | 11.16                |                           |                 | A3G3                 | Median                       | 12.21    | Median  | 12.70                        | 12.66  | 12.40  | 12.33  | 11.82    | 12.11        | 11.88    | 12.54    | 12.34   | 11.74   | 12.35            | 11.99  | 11.74  | 12.42   | 11.30           | Median                       | 11.89           | 10.72              |
|      |                      |                           |                 | A3G3                 | IQR                          | 9.99     | IQR     | 9.73                         | 9.42   | 9.96   | 10.18  | 9.24     | 9.79         | 10.68    | 10.79    | 9.21    | 10.20   | 9.92             | 10.59  | 8.56   | 10.01   | 9.24            | IQR                          | 9.82            | 9.06               |
|      |                      |                           |                 | A3G3                 | $\chi^2(14)$                 | 13.58    | Z       | 13.98                        | 14.45  | 14.18  | 14.34  | 13.71    | 13.92        | 14.33    | 14.52    | 13.57   | 13.41   | 13.73            | 13.65  | 13.94  | 13.57   | 13.23           | Z                            | 13.56           | 12.86              |
|      |                      |                           |                 | A3G3                 | p value                      | 0.001    | p value | -                            | -0.255 | -0.357 | -1.172 | -1.478   | -0.561       | -0.459   | -1.376   | -1.478  | -1.070  | -                | -0.153 | -1.682 | -1.376  | -2.803          | p value                      | -               | -2.023             |
| 17   | 11.80                |                           |                 | aFA3G3               | Median                       | 1.87     | Median  | 2.28                         | 2.00   | 1.98   | 1.85   | 1.60     | 1.92         | 1.93     | 1.95     | 1.96    | 1.91    | 1.71             | 1.61   | 1.90   | 1.82    | 1.52            | Median                       | 1.91            | 1.69               |
|      |                      |                           |                 | aFA3G3               | IQR                          | 0.99     | IQR     | 0.87                         | 0.86   | 0.85   | 1.03   | 0.39     | 0.79         | 1.30     | 0.92     | 0.83    | 0.84    | 0.77             | 0.82   | 0.83   | 0.77    | 0.68            | IQR                          | 0.88            | 0.94               |
|      |                      |                           |                 | aFA3G3               | $\chi^2(14)$                 | 2.79     | Z       | 2.84                         | 3.03   | 3.19   | 2.69   | 2.97     | 2.91         | 3.07     | 3.11     | 2.98    | 2.98    | 2.72             | 2.18   | 2.40   | 2.94    | 2.15            | Z                            | 2.67            | 2.82               |
|      |                      |                           |                 | aFA3G3               | p value                      | < 0.0001 | p value | -                            | -0.255 | -0.153 | -1.478 | -0.663   | -0.255       | -0.968   | -0.255   | -0.357  | -1.070  | -                | -0.764 | -0.764 | -2.701  | -1.988          | p value                      | -               | -0.944             |
| 18   | 12.02                |                           |                 | FA3G3                | Median                       | 1.21     | Median  | 1.28                         | 1.21   | 1.24   | 1.28   | 1.31     | 1.22         | 1.21     | 1.30     | 1.30    | 1.29    | 1.27             | 1.26   | 1.12   | 1.34    | 1.16            | Median                       | 1.00            | 0.91               |
|      |                      |                           |                 | FA3G3                | IQR                          | 0.96     | IQR     | 1.01                         | 0.91   | 0.98   | 0.90   | 0.92     | 0.94         | 1.06     | 1.08     | 0.91    | 0.92    | 0.96             | 0.98   | 0.91   | 0.94    | 0.97            | IQR                          | 0.84            | 0.76               |
|      |                      |                           |                 | FA3G3                | $\chi^2(14)$                 | 1.75     | Z       | 1.71                         | 1.87   | 1.86   | 1.60   | 1.74     | 1.75         | 1.98     | 2.04     | 1.77    | 1.66    | 1.88             | 1.81   | 1.82   | 1.98    | 1.71            | Z                            | 1.67            | 1.60               |
|      |                      |                           |                 | FA3G3                | p value                      | 0.022    | p value | -                            | -0.255 | -0.051 | -1.886 | -0.561   | -0.866       | -0.764   | -1.784   | -0.459  | -0.255  | -                | -0.051 | -1.274 | -1.784  | -1.070          | p value                      | -               | -2.023             |

| Peak | GU             | Structure                                                                         |                                                                                   |                      | Friedman's test <sup>a</sup> |              | Wilcoxon's test <sup>b</sup> |              |              |              |              |              |              |              |              |              |              |                  |              |              |              |                 | Wilcoxon's test <sup>c</sup> |                 |                    |  |        |
|------|----------------|-----------------------------------------------------------------------------------|-----------------------------------------------------------------------------------|----------------------|------------------------------|--------------|------------------------------|--------------|--------------|--------------|--------------|--------------|--------------|--------------|--------------|--------------|--------------|------------------|--------------|--------------|--------------|-----------------|------------------------------|-----------------|--------------------|--|--------|
|      |                | Desialylated CFG notation                                                         | Oxford notation                                                                   | Oxford notation name |                              | All          |                              | 1            | 2            | 3            | 4            | 5            | 6            | 7            | 8            | 9            | 10           | 11               | 12           | 13           | 14           | 15              |                              | 11              | 16                 |  |        |
|      |                |                                                                                   |                                                                                   |                      |                              |              |                              | Serum ref.   | 6h RT        | 2h RT        | 2h 4°C       | 6h after     | gel 6h after | 2M -80°C     | 2M -20°C     | 24h 4°C      | 48h 4°C      | Plasma ref. n=10 | Vacuum       | EDTA         | Heparin      | Hemolysis water |                              | Plasma ref. n=5 | Hemolysis combined |  |        |
| 19   | 12.61          | 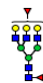 | 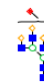 | FaFA3G3              | Median                       | 0.27         | Median                       | 0.27         | 0.28         | 0.29         | 0.27         | 0.29         | 0.29         | 0.29         | 0.28         | 0.26         | 0.26         | 0.22             | 0.27         | 0.24         | 0.28         | 0.30            | Median                       | 0.25            | 0.28               |  |        |
|      |                |                                                                                   |                                                                                   |                      | IQR                          | 0.16<br>0.39 | IQR                          | 0.20<br>0.37 | 0.14<br>0.42 | 0.14<br>0.45 | 0.21<br>0.40 | 0.11<br>0.39 | 0.15<br>0.46 | 0.17<br>0.35 | 0.16<br>0.37 | 0.15<br>0.43 | 0.15<br>0.44 | 0.12<br>0.33     | 0.15<br>0.36 | 0.14<br>0.41 | 0.19<br>0.49 | 0.19<br>0.39    | IQR                          | 0.17<br>0.43    | 0.18<br>0.44       |  |        |
|      |                |                                                                                   |                                                                                   |                      | χ <sup>2</sup> (14)          | 28.693       | Z                            | -            | -1.682       | -1.172       | -2.073       | -0.051       | -1.886       | -0.051       | -0.051       | -0.866       | -1.070       | -                | -1.784       | -0.459       | -2.497       | -1.886          | Z                            |                 | -1.214             |  |        |
|      |                |                                                                                   |                                                                                   |                      | p value                      | 0.011        | p value                      | -            | 0.093        | 0.241        | 0.038        | 0.959        | 0.059        | 0.959        | 0.959        | 0.386        | 0.285        | -                | 0.074        | 0.646        | 0.013        | 0.059           | p value                      |                 | 0.225              |  |        |
| 20   | 13.00          | 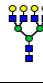 | 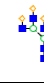 | A4G4                 | Median                       | 2.15         | Median                       | 2.08         | 2.24         | 2.24         | 2.17         | 1.73         | 2.09         | 2.17         | 2.15         | 1.94         | 1.98         | 2.33             | 2.52         | 2.03         | 2.20         | 2.18            | Median                       | 2.79            | 2.54               |  |        |
|      |                |                                                                                   |                                                                                   |                      | IQR                          | 1.91<br>2.52 | IQR                          | 1.83<br>2.38 | 1.79<br>2.74 | 1.91<br>2.76 | 1.94<br>2.45 | 1.21<br>2.07 | 1.76<br>2.46 | 2.02<br>2.51 | 2.00<br>2.30 | 1.67<br>2.36 | 1.66<br>2.22 | 2.06<br>2.82     | 2.11<br>2.78 | 1.65<br>2.56 | 2.01<br>2.78 | 2.03<br>2.57    | IQR                          | 2.33<br>3.02    | 2.30<br>3.03       |  |        |
|      |                |                                                                                   |                                                                                   |                      | χ <sup>2</sup> (14)          | 52.797       | Z                            | -            | -0.764       | -1.274       | -0.561       | -2.497       | -0.357       | -1.274       | -0.561       | -0.866       | -1.478       | -                | -1.784       | -2.191       | -0.459       | -1.376          | Z                            |                 | -0.674             |  |        |
|      |                |                                                                                   |                                                                                   |                      | p value                      | < 0.0001     | p value                      | -            | 0.445        | 0.203        | 0.575        | 0.013        | 0.721        | 0.203        | 0.575        | 0.386        | 0.139        | -                | 0.074        | 0.028        | 0.646        | 0.169           | p value                      |                 | 0.500              |  |        |
| 21   | 13.62<br>13.77 | 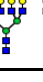 | 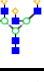 | aFA4G4               | Median                       | 0.38         | Median                       | 0.44         | 0.65         | 0.66         | 0.32         | 0.06         | 0.24         | 0.43         | 0.42         | 0.51         | 0.31         | 0.39             | 0.18         | 0.16         | 0.64         | 0.18            | Median                       | 0.55            | 0.50               |  |        |
|      |                |                                                                                   |                                                                                   | FA4G4                | IQR                          | 0.05<br>0.71 | IQR                          | 0.09<br>0.59 | 0.00<br>0.90 | 0.07<br>0.88 | 0.00<br>0.74 | 0.00<br>0.43 | 0.00<br>0.66 | 0.21<br>0.72 | 0.14<br>0.71 | 0.09<br>0.84 | 0.03<br>0.56 | 0.11<br>0.79     | 0.04<br>1.04 | 0.05<br>0.55 | 0.04<br>0.78 | 0.00<br>0.41    | IQR                          | 0.12<br>0.78    | 0.22<br>1.29       |  |        |
|      |                |                                                                                   |                                                                                   | χ <sup>2</sup> (14)  | 22.523                       | Z            | -                            | -            | -            | -            | -            | -            | -            | -            | -            | -            | -            | -                | -            | -            | -            | -               | -                            | -               | Z                  |  | -0.730 |
|      |                |                                                                                   |                                                                                   | p value              | 0.068                        | p value      | -                            | -            | -            | -            | -            | -            | -            | -            | -            | -            | -            | -                | -            | -            | -            | -               | -                            | -               | p value            |  | 0.465  |
| 22   | 14.22          | 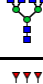 | 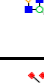 | aF2A4G4              | Median                       | 0.03         | Median                       | 0.03         | 0.02         | 0.02         | 0.03         | 0.02         | 0.03         | 0.00         | 0.00         | 0.01         | 0.01         | 0.08             | 0.04         | 0.02         | 0.08         | 0.12            | Median                       | 0.12            | 0.09               |  |        |
|      |                |                                                                                   |                                                                                   | IQR                  | 0.00<br>0.08                 | IQR          | 0.01<br>0.05                 | 0.00<br>0.06 | 0.00<br>0.09 | 0.00<br>0.05 | 0.00<br>0.07 | 0.01<br>0.06 | 0.00<br>0.06 | 0.00<br>0.04 | 0.00<br>0.06 | 0.00<br>0.03 | 0.00<br>0.14 | 0.02<br>0.14     | 0.00<br>0.08 | 0.02<br>0.11 | 0.07<br>0.15 | IQR             | 0.08<br>0.15                 | 0.08<br>0.13    |                    |  |        |
|      |                |                                                                                   |                                                                                   | χ <sup>2</sup> (14)  | 51.396                       | Z            | -                            | -0.980       | -0.178       | -1.120       | -1.260       | -0.561       | -1.955       | -2.100       | -0.652       | -2.100       | -            | -0.059           | -1.352       | 0.000        | -1.988       | Z               |                              | -0.405          |                    |  |        |
|      |                |                                                                                   |                                                                                   | p value              | < 0.0001                     | p value      | -                            | 0.327        | 0.859        | 0.263        | 0.208        | 0.575        | 0.051        | 0.036        | 0.515        | 0.036        | -            | 0.953            | 0.176        | 1.000        | 0.047        | p value         |                              | 0.686           |                    |  |        |
| 23   | 14.69          | 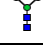 | 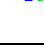 | aF3A4G4              | Median                       | 0.10         | Median                       | 0.11         | 0.10         | 0.09         | 0.10         | 0.08         | 0.09         | 0.07         | 0.06         | 0.09         | 0.09         | 0.14             | 0.17         | 0.09         | 0.11         | 0.24            | Median                       | 0.24            | 0.22               |  |        |
|      |                |                                                                                   |                                                                                   | IQR                  | 0.07<br>0.15                 | IQR          | 0.08<br>0.12                 | 0.08<br>0.13 | 0.08<br>0.12 | 0.04<br>0.16 | 0.05<br>0.12 | 0.06<br>0.15 | 0.05<br>0.09 | 0.05<br>0.08 | 0.08<br>0.12 | 0.10         | 0.10         | 0.14             | 0.16         | 0.14         | 0.30         | IQR             | 0.17<br>0.28                 | 0.19<br>0.23    |                    |  |        |
|      |                |                                                                                   |                                                                                   | χ <sup>2</sup> (14)  | 71.270                       | Z            | -                            | -0.561       | -0.764       | -0.153       | -0.866       | -0.051       | -2.497       | -2.803       | -1.274       | -1.682       | -            | -0.561           | -2.395       | -2.293       | -2.293       | Z               |                              | -0.674          |                    |  |        |
|      |                |                                                                                   |                                                                                   | p value              | < 0.0001                     | p value      | -                            | 0.575        | 0.445        | 0.878        | 0.386        | 0.959        | 0.013        | 0.005        | 0.203        | 0.093        | -            | 0.575            | 0.017        | 0.022        | 0.022        | p value         |                              | 0.500           |                    |  |        |
