# Supplementary material
Source: publisher figshare collection journal article supplement (https://plos.figshare.com/articles/dataset/_/6806699)
Supplement: Supplementary file [file 1]

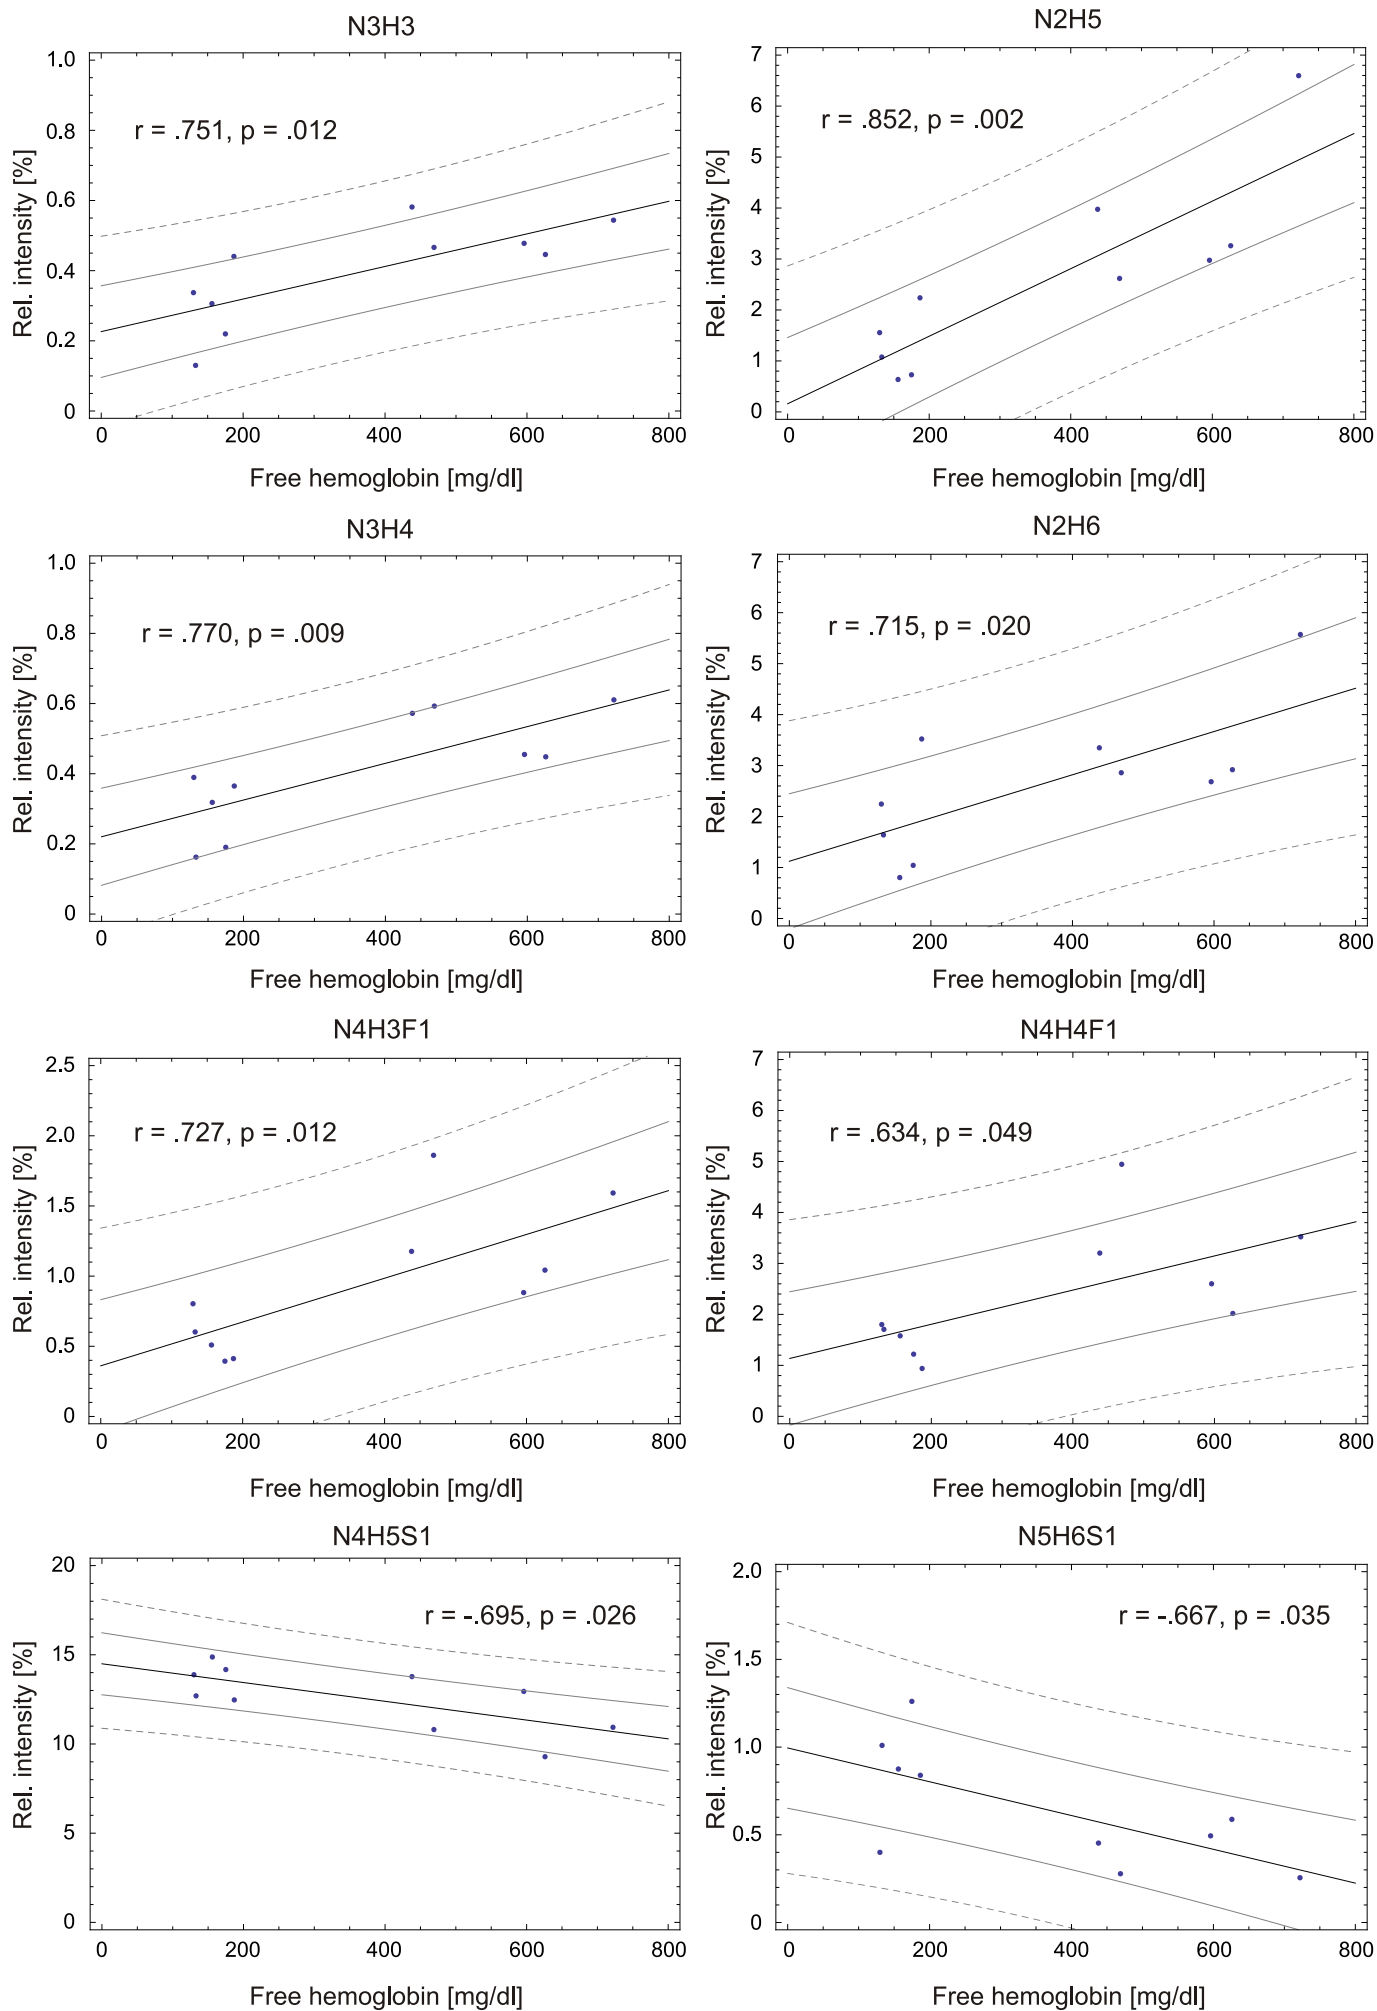

**S2 Fig.** Scatter plots of free hemoglobin concentration and rel.intensities of N-glycans
