# Supplementary material
Source: publisher figshare collection journal article supplement (https://plos.figshare.com/articles/dataset/_/6806699)

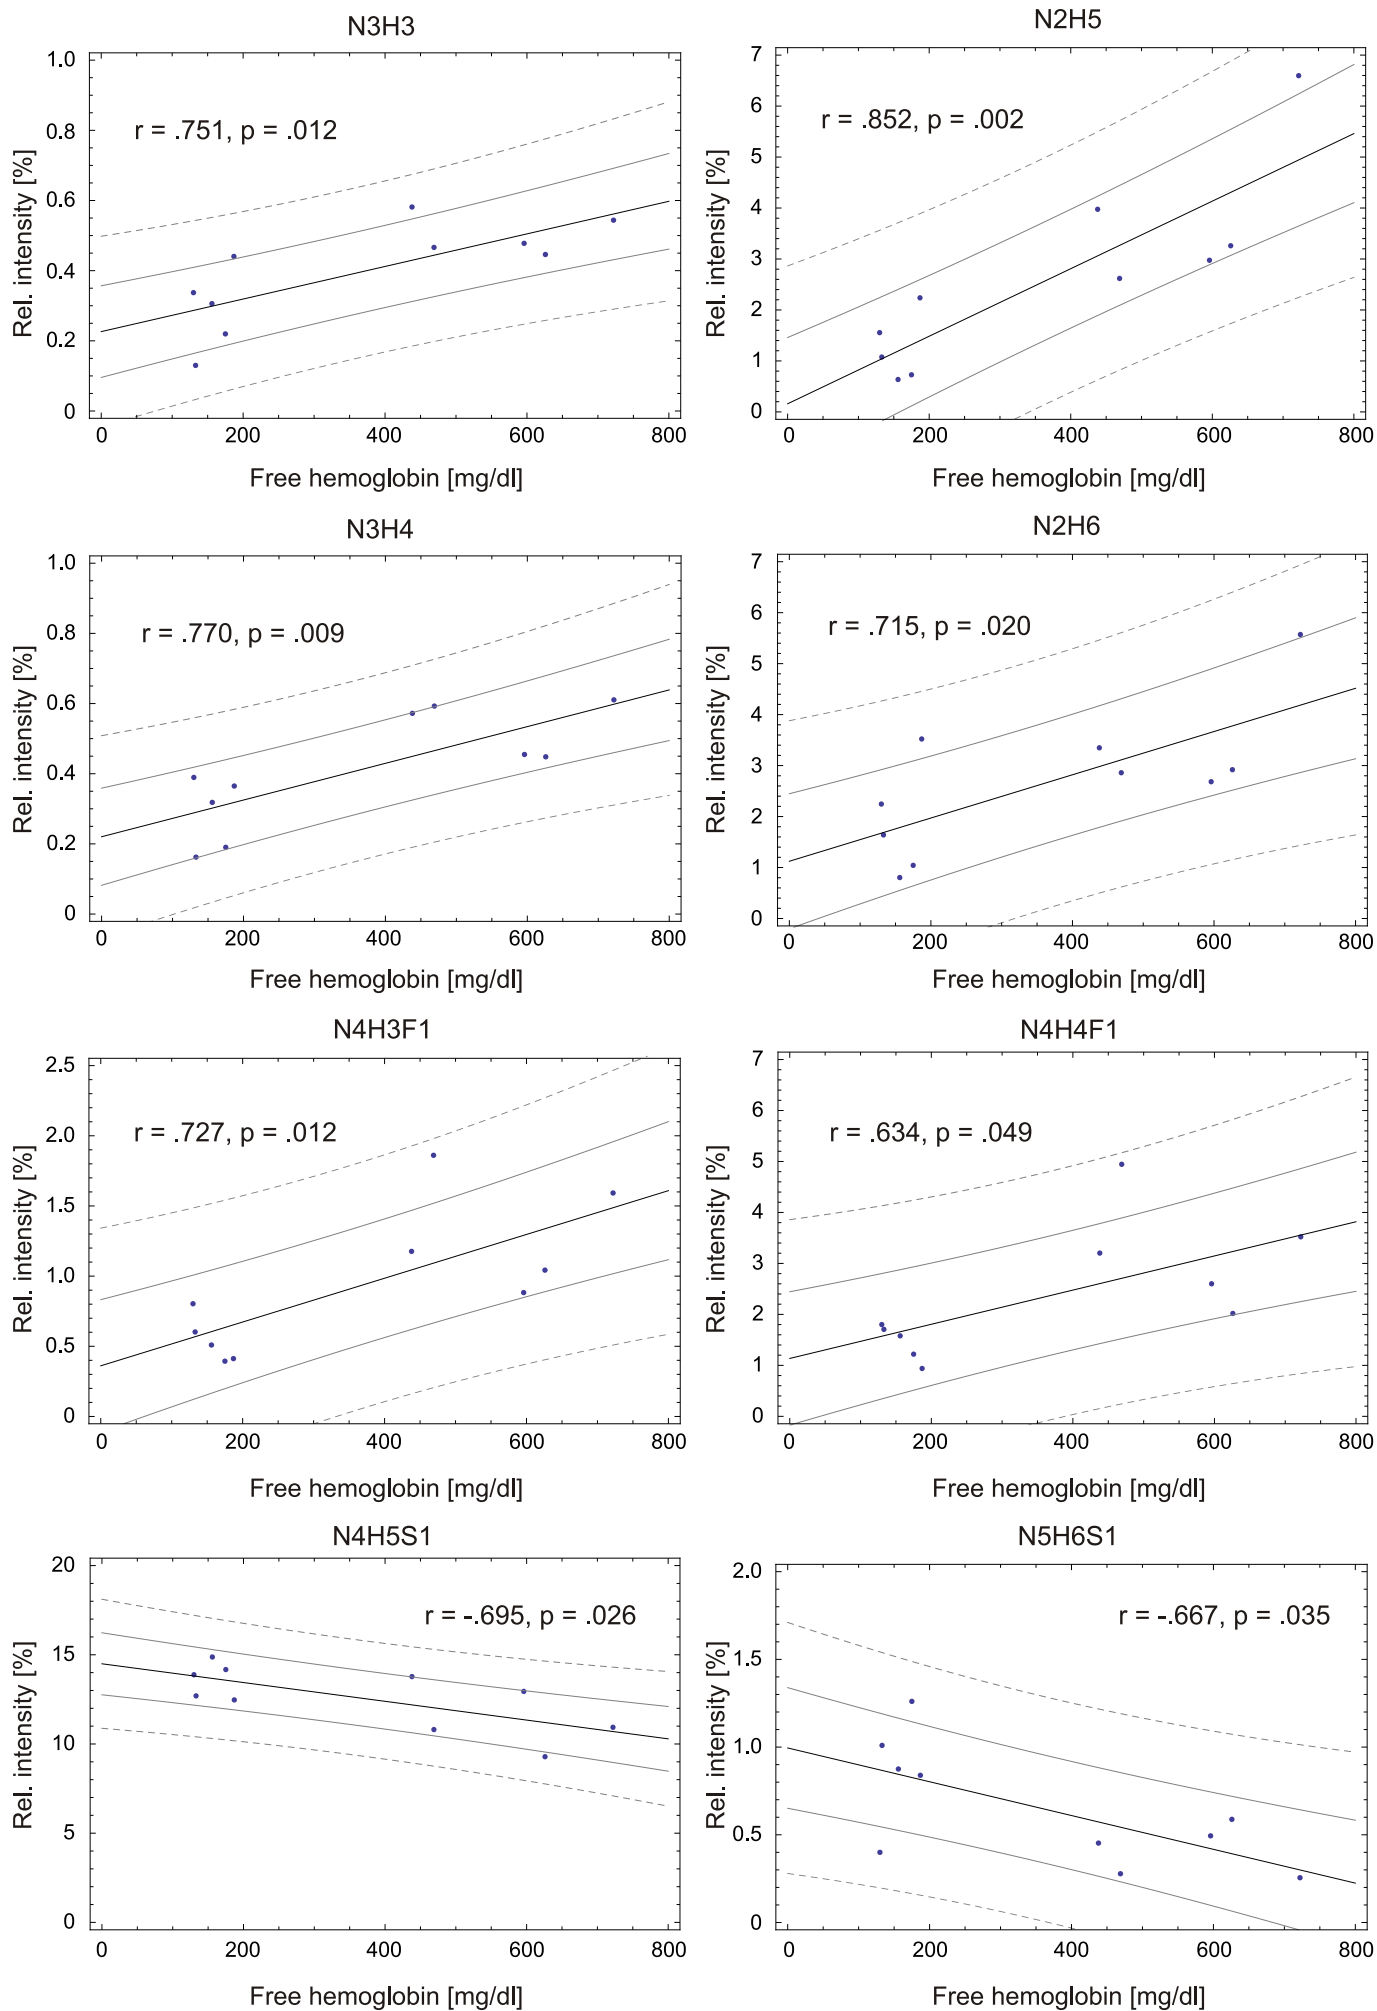

**S2 Fig.** Scatter plots of free hemoglobin concentration and rel.intensities of N-glycans

Supplement: Supplementary file 1 [file 1 › pone.0200507.s002.pdf]
